# Supplementary material for: Prediction models for hospital readmissions in patients with heart disease: a systematic review and meta-analysis
Source: PubMed Central journal article supplement — BMJ Open. 2021 Aug 17;11(8):e047576. doi: 10.1136/bmjopen-2020-047576 (PMC8372817; doi:10.1136/bmjopen-2020-047576), 2021-08-17
Supplement: bmjopen-2020-047576.draft_revisions.pdf [file bmjopen-2020-047576.draft_revisions.pdf]

# BMJ Open

BMJ Open is committed to open peer review. As part of this commitment we make the peer review history of every article we publish publicly available.

When an article is published we post the peer reviewers' comments and the authors' responses online. We also post the versions of the paper that were used during peer review. These are the versions that the peer review comments apply to.

The versions of the paper that follow are the versions that were submitted during the peer review process. They are not the versions of record or the final published versions. They should not be cited or distributed as the published version of this manuscript.

BMJ Open is an open access journal and the full, final, typeset and author-corrected version of record of the manuscript is available on our site with no access controls, subscription charges or pay-per-view fees (<http://bmjopen.bmj.com>).

If you have any questions on BMJ Open's open peer review process please email [info.bmjopen@bmj.com](mailto:info.bmjopen@bmj.com)

# BMJ Open

## Prediction models for hospital readmissions in patients with heart disease: a systematic review and meta-analysis

|                               |                                                                                                                                                                                                                                                                                                                                                                                                                                                                                                                                                                                                                                                                                                                                                                                                                                                                                                                               |
|-------------------------------|-------------------------------------------------------------------------------------------------------------------------------------------------------------------------------------------------------------------------------------------------------------------------------------------------------------------------------------------------------------------------------------------------------------------------------------------------------------------------------------------------------------------------------------------------------------------------------------------------------------------------------------------------------------------------------------------------------------------------------------------------------------------------------------------------------------------------------------------------------------------------------------------------------------------------------|
| Journal:                      | <i>BMJ Open</i>                                                                                                                                                                                                                                                                                                                                                                                                                                                                                                                                                                                                                                                                                                                                                                                                                                                                                                               |
| Manuscript ID                 | bmjopen-2020-047576                                                                                                                                                                                                                                                                                                                                                                                                                                                                                                                                                                                                                                                                                                                                                                                                                                                                                                           |
| Article Type:                 | Original research                                                                                                                                                                                                                                                                                                                                                                                                                                                                                                                                                                                                                                                                                                                                                                                                                                                                                                             |
| Date Submitted by the Author: | 02-Dec-2020                                                                                                                                                                                                                                                                                                                                                                                                                                                                                                                                                                                                                                                                                                                                                                                                                                                                                                                   |
| Complete List of Authors:     | van Grootven, Bastiaan; KU Leuven; Research Foundation Flanders<br>Jepma, Patricia; Amsterdam UMC Locatie AMC, ; Amsterdam University of Applied Sciences,<br>Rijkema, Corinne; Vrije Universiteit Amsterdam<br>Verweij, Lotte; Amsterdam University of Applied Sciences,<br>Leeflang, Mariska; Amsterdam UMC Locatie AMC<br>Daams, Joost; Amsterdam UMC Location AMC, Medical Library<br>Deschodt, Mieke; KU Leuven – University of Leuven, Department of Public Health and primary care ; University of Basel, Department of Public Health<br>Milisen, Koen; KU Leuven – University of Leuven, Department of Public Health and Primary Care; University Hospitals Leuven, Department of Geriatric Medicine<br>Flamaing, Johan; University Hospitals Leuven, Department of Public health and primary care ; KU Leuven – University of Leuven, Department of Geriatric Medicine<br>Buurman, Bianca; Amsterdam UMC Locatie AMC |
| Keywords:                     | CARDIOLOGY, Adverse events < THERAPEUTICS, Risk management < HEALTH SERVICES ADMINISTRATION & MANAGEMENT                                                                                                                                                                                                                                                                                                                                                                                                                                                                                                                                                                                                                                                                                                                                                                                                                      |
|                               |                                                                                                                                                                                                                                                                                                                                                                                                                                                                                                                                                                                                                                                                                                                                                                                                                                                                                                                               |

SCHOLARONE™  
Manuscripts

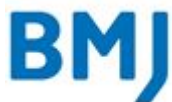

I, the Submitting Author has the right to grant and does grant on behalf of all authors of the Work (as defined in the below author licence), an exclusive licence and/or a non-exclusive licence for contributions from authors who are: i) UK Crown employees; ii) where BMJ has agreed a CC-BY licence shall apply, and/or iii) in accordance with the terms applicable for US Federal Government officers or employees acting as part of their official duties; on a worldwide, perpetual, irrevocable, royalty-free basis to BMJ Publishing Group Ltd ("BMJ") its licensees and where the relevant Journal is co-owned by BMJ to the co-owners of the Journal, to publish the Work in this journal and any other BMJ products and to exploit all rights, as set out in our [licence](#).

The Submitting Author accepts and understands that any supply made under these terms is made by BMJ to the Submitting Author unless you are acting as an employee on behalf of your employer or a postgraduate student of an affiliated institution which is paying any applicable article publishing charge ("APC") for Open Access articles. Where the Submitting Author wishes to make the Work available on an Open Access basis (and intends to pay the relevant APC), the terms of reuse of such Open Access shall be governed by a Creative Commons licence – details of these licences and which [Creative Commons](#) licence will apply to this Work are set out in our licence referred to above.

Other than as permitted in any relevant BMJ Author's Self Archiving Policies, I confirm this Work has not been accepted for publication elsewhere, is not being considered for publication elsewhere and does not duplicate material already published. I confirm all authors consent to publication of this Work and authorise the granting of this licence.

# Prediction models for hospital readmissions in patients with heart disease: a systematic review and meta-analysis.

Bastiaan van Grootven\* RN, PhD<sup>a,b</sup>, Patricia Jepma\* RN, MSc<sup>c</sup>, Corinne Rijpkema MSc<sup>d</sup>, Lotte Verweij RN, MSc<sup>c</sup>, Mariska Leeftang PhD<sup>e</sup>, Joost Daams MA<sup>f</sup>, Mieke Deschodt RN, PhD<sup>b,g,h</sup>, Koen Milisen RN, PhD<sup>b,i</sup>, Johan Flamaing MD, PhD<sup>b,i</sup>, Bianca Buurman RN, PhD<sup>e,j</sup>.

\* Joint first authors

<sup>a</sup> Research Foundation Flanders, Brussels, Belgium;

<sup>b</sup> KU Leuven, Department of Public Health and Primary Care, Leuven, Belgium.

<sup>c</sup> Center of Expertise Urban Vitality, Faculty of Health, Amsterdam University of Applied Sciences, Amsterdam, the Netherlands.

<sup>d</sup> Vrije Universiteit, Faculty of Science, Amsterdam, the Netherlands.

<sup>e</sup> Amsterdam UMC, Department of Clinical Epidemiology, Biostatistics and Bioinformatics, Amsterdam, the Netherlands.

<sup>f</sup> Amsterdam UMC, Research support, Amsterdam, the Netherlands.

<sup>g</sup> University of Hasselt, Department of Healthcare and Ethics. Faculty of Medicine and Life Sciences, Hasselt, Belgium.

<sup>h</sup> University of Basel, Department of Public Health, Basel, Switzerland.

<sup>i</sup> University Hospital Leuven, Department of Geriatric Medicine, Leuven, Belgium.

<sup>j</sup> Amsterdam UMC, Department of Internal Medicine, section of Geriatric Medicine. Amsterdam, the Netherlands.

## Corresponding author

Patricia Jepma, RN MSc

Amsterdam University Medical Center, department of Cardiology

Center of Expertise Urban Vitality, Amsterdam University of Applied Sciences

Tafelbergweg 51

1105 BD Amsterdam, the Netherlands

E-mail: [p.jepma@amsterdamumc.nl](mailto:p.jepma@amsterdamumc.nl)

Telephone: +31 6 50440499

Word count: 3036 words

## Abstract

**Objective:** To describe the discrimination and calibration of clinical prediction models, identify characteristics that contribute to better predictions, and investigate predictors that are associated with unplanned hospital readmissions.

**Design:** Systematic review and meta-analysis.

**Data source:** Medline, EMBASE, ICTPR (for study protocols), and Web of Science (for conference proceedings) were searched up to 25 August 2020.

**Eligibility criteria for selecting studies:** Studies were eligible if they reported on 1) hospitalized adult patients with acute heart disease; 2) a clinical presentation of prediction models with c-statistic; 3) unplanned hospital readmission within six months.

**Primary and secondary outcome measures:** Model discrimination for unplanned hospital readmission within six months measured using concordance (c) statistics and model calibration. Meta-regression and sub-group analyses were performed to investigate predefined sources of heterogeneity. Outcome measures from models reported in multiple independent cohorts and similarly defined risk predictors were pooled.

**Results:** Sixty studies describing 81 models were included: 43 models were newly developed, and 38 were externally validated. Included populations were mainly heart failure (HF) patients (n=29). The average age ranged between 56.5 and 84 years. The incidence of readmission ranged from 3% till 43%. Risk of bias was high in almost all studies. The c-statistic was <0.7 in 72 models, between 0.7-0.8 in 16 models and >0.8 in 5 models. The study population, data source and number of predictors were significant moderators for the discrimination. Calibration was reported for 27 models. Only the GRACE-score had adequate discrimination in independent cohorts (0.78, 95% CI 0.63-0.86). Eighteen predictors were pooled.

1  
2  
3 **Conclusion:** Some promising models require updating and validation before use in clinical  
4  
5 practice. The lack of independent validation studies, high risk of bias and low consistency in  
6  
7 measured predictors limit their applicability.  
8  
9

10  
11 **Trial registration:** Prospero, CRD42020159839  
12  
13  
14  
15  
16  
17  
18  
19

20 **Key words:** heart disease, meta-analysis, patient readmission, risk assessment, systematic  
21  
22 review.  
23  
24  
25  
26  
27  
28  
29  
30  
31  
32  
33  
34  
35  
36  
37  
38  
39  
40  
41  
42  
43  
44  
45  
46  
47  
48  
49  
50  
51  
52  
53  
54  
55  
56  
57  
58  
59  
60

## Article summary

### Strengths and limitations of this study

- Largest investigation of unplanned hospital readmission risk to date, including 81 unique prediction models in the systematic review.
- Independent and standardized procedures for study selection, data collection and risk of bias assessment.
- High risk of bias in current prediction models and unexplained heterogeneity between models limit recommendations for using prediction model in clinical practice.

## Introduction

Hospital readmissions in patients with acute heart disease are associated with a high burden on patients, healthcare and costs.<sup>1</sup> The identification of high-risk hospitalized patients is important to provide timely interventions.

Numerous systematic reviews have previously investigated the prediction of unplanned hospital readmissions in several populations.<sup>2-11</sup> While some have included hospitalized patients in general<sup>10,11</sup>, others have focused specifically on patients with heart failure (HF)<sup>2,4-7,9</sup> or acute myocardial infarction (AMI).<sup>3,8</sup> The conclusion is generally the same, the discrimination is poor to adequate, and there is little consistency in the type of predictors included in the models.

The clinical applicability of risk prediction models in daily practice is currently limited. Statistical models are often not presented in a clinically useful way or models based on administrative data are considered.<sup>3</sup> These models therefore cannot be readily used in daily practice. In addition, prediction models are often developed for a very specific population, which asks from clinicians to be familiar with several models. Furthermore, patients may belong to multiple populations because of cardiac comorbidities.

We believe that the state of the art on risk prediction can be improved if more knowledge is available on the performance of clinical risk prediction models and risk predictors across different populations of patients with heart disease. Although heterogeneity in models and predictors is often considered as a limitation, it can inform effect moderators on how predictions can be improved.<sup>12</sup> For example, perhaps we can identify predictors who demonstrate a consistent association with hospital readmission regardless of the underlying disease. If this can be identified, a more general prediction model could be developed that is relevant for the heterogeneous group of patients on cardiac care units. This might contribute to



1  
2  
3 the early recognition and onset of preventive interventions in patients with heart disease at risk  
4  
5 of readmission.  
6

7  
8 We therefore performed a systematic review and meta-analysis on clinical risk prediction  
9  
10 models for the outcome unplanned hospital readmission in patients hospitalized for acute heart  
11  
12 disease. Our aim was to describe the discrimination and calibration of clinical prediction  
13  
14 models, identify characteristics that contribute to better predictions, and to investigate  
15  
16 predictors that are consistently associated with hospital readmissions.  
17  
18  
19  
20  
21  
22  
23  
24  
25  
26  
27  
28  
29  
30  
31  
32  
33  
34  
35  
36  
37  
38  
39  
40  
41  
42  
43  
44  
45  
46  
47  
48  
49  
50  
51  
52  
53  
54  
55  
56  
57  
58  
59  
60

For peer review only

## Methods

A protocol was registered in PROSPERO (CRD42020159839). The results are reported following the PRISMA (Preferred Reporting Items for Systematic Reviews and Meta-Analyses) statement.<sup>13</sup>

### Eligibility criteria

Studies were eligible if 1) the study population included hospitalized adult patients with (symptoms of) heart disease; 2) a prediction model with c-statistic was reported; 3) a clinically useful presentation of the model with risk factors was reported; 4) the outcome was unplanned hospital readmissions within six months; 5) the study design was appropriate, i.e. (nested) case-control study, (prospective and retrospective) cohort study, database and registry study, or secondary analysis of a trial; 6) they were reported in English.

### Information sources

A search strategy was designed with an information specialist (PROSPERO protocol and Supplemental Text 1). We searched the Medline, EMBASE, WHO ICTPR search portal (for study protocols), and Web of Science (for conference proceedings) databases up to 25 August 2020 without any restrictions for eligible studies. We searched for full text manuscripts of the identified protocols. After selecting the full text manuscripts, we screened references lists and prospective citations (using Google Scholar) for additional eligible studies.

### Study selection

Three reviewers were involved in the study selection process. Each reviewer independently screened two thirds of the titles, abstracts and full-text articles of potentially relevant references identified in the literature search. Disagreements were resolved through consensus. Sixteen authors were contacted and six delivered data for readmission when a composite outcome was used. Two authors were also contacted when data was reported combining multiple patient

1  
2  
3 populations. However, no additional data was provided for the population with heart disease  
4  
5 and these studies were excluded.  
6  
7

### 8 **Data extraction**

9  
10  
11 Data extraction was performed based on the ‘Critical Appraisal and Data Extraction for  
12  
13 Systematic Reviews’ checklist using standardized forms in the Distiller Systematic Review  
14  
15 Software (see Supplemental Text 2 for the data items).<sup>14</sup> One reviewer collected the data and  
16  
17 the second reviewer verified the extracted data. Disagreements were resolved through  
18  
19 consensus. Eight authors were contacted and two delivered data to resolve uncertainties or  
20  
21 missing data.  
22  
23

### 24 **Risk of bias**

25  
26  
27 The PROBAST tool<sup>15</sup> was used to assess the risk of bias (RoB) for the participants, predictors,  
28  
29 outcome and analysis for each model. One author assessed the RoB as low, high or unclear,  
30  
31 and the second author verified the extracted data and RoB conclusion. Disagreements were  
32  
33 resolved through consensus. In addition, the applicability of the included studies based on our  
34  
35 research question was assessed for the participants, predictors and outcome domains and rated  
36  
37 as low concerns, high concerns or uncertain concerns regarding applicability.  
38  
39  
40  
41

### 42 **Summary measures**

43  
44  
45 The discrimination of the prediction models were described using the concordance (c)-statistic.  
46  
47 Missing standard errors were derived from the sample data.<sup>16</sup> The calibration was described  
48  
49 using the number of observed and expected events, the calibration slope, calibration in large,  
50  
51 or the Hosmer-Lemeshow test.  
52  
53

54  
55 The association between risk predictors and hospital readmission was described using  
56  
57 regression coefficients. Missing standard errors for the coefficients were considered missing  
58  
59 completely at random and were not imputed. A complete case analysis was performed.  
60

## Synthesis of results and analyses

Meta-analyses using random-effects models, with the Hartung-Knapp modification, were performed to describe the distribution of the between-study variance of the different prediction models and their predictors. Because we considered that there would be substantial heterogeneity, conclusions were not based on the precision of the pooled estimates.

The c-statistic from each model was pooled and a meta-regression was performed to investigate the moderation effect of age and the number of predictors on the discrimination. A subgroup analysis was performed to investigate the moderation effect of the different patient populations, design, outcome definition, and endpoint. The c-statistic of the validated model was used if available; otherwise the c-statistic from the development phase was used.

The c-statistics of specific prediction models that were evaluated in multiple studies were pooled for the endpoint 30 days follow-up.

Coefficients of predictors that were similarly defined in at least five studies were pooled for the endpoint 30 days follow-up. The patient populations were defined as subgroups to explore consistency and heterogeneity ( $I^2$ , tau) in the effect estimates.

Analyses were performed using the 'metan' package in STATA 15 IC and the 'metamisc package' in Rstudio.

## Public and patient involvement

Because of the design of the study and because we did not collect primary data, we did not involve patients or the public in the design, conduct, or reporting of our research.

## Results

A total of 8588 abstracts were reviewed and 60 studies describing 81 separate models were included (Figure 1). Table 1 provides an overview of the included studies and models, which were published between 2001 and 2020. The majority of the studies (n=40) was performed in the United States. The data sources used were mostly retrospective cohort studies (n=15), hospital databases (n=13) and registries (n=13). Included populations were mainly HF patients (n=29), surgical patients (n=14) and patients with an AMI or acute coronary syndrome (n=10). The average age was between 56.5 and 84 years. The sample size of development cohorts ranged from 182 till 193,899 patients and of the validation cohorts between 104 and 321,088 patients. The outcome of interest was mostly all-cause readmission (n=41) and measured on 30 days (n=55). The incidence of readmission per study ranged from 3% till 43%.

**Table 1. Study characteristics**

| Study                           | Model                                    | Data source          | Development | Validation | Sample size |       | Population           | Average age              | Outcome | Readmission (%) |      |
|---------------------------------|------------------------------------------|----------------------|-------------|------------|-------------|-------|----------------------|--------------------------|---------|-----------------|------|
|                                 |                                          |                      |             |            | Dev.        | Val.  |                      |                          |         | Dev.            | Val. |
| Moretti et al. <sup>17</sup>    | EuroHeart PCI score                      | Hospital database    | NA          | Ext        | -           | 1192  | ACS                  | 71 (7)                   | 30d     |                 | 4.7  |
| Asche et al. <sup>18</sup>      | NR                                       | Retrospective cohort | Yes         | Split      | 2446        | 612   | AMI                  | 65 (15)                  | 30d     | 8.9             |      |
| Cediel et al. <sup>19</sup>     | TARRACO Risk Score                       | Retrospective cohort | Yes         | No         | 611         | 401   | AMI type 2, ischemia | D: 78 [17]<br>V: 60 [21] | 30d     | 2.6             |      |
|                                 |                                          | Retrospective cohort | Yes         | No         | 611         | 401   | AMI type 2, ischemia | D: 78 [17]<br>V: 60 [21] | 180d    | 7.9             |      |
| Chotechuan et al. <sup>20</sup> | GRACE                                    | Retrospective cohort | NA          | Ext        | -           | 152   | AMI                  | 60.5 (6.3)               | 30d     |                 | 5.3  |
|                                 | GRACE                                    | Retrospective cohort | NA          | Ext        | -           | 152   | AMI                  | 60.5 (6.3)               | 180d    |                 | 9.2  |
| Hilbert et al. <sup>21</sup>    | AMI decision tree                        | Registry             | Yes         | Ext        | 10848       | 10701 | AMI                  | NR                       | 30d     | 20.6            | 19.7 |
| Dodson et al. <sup>22</sup>     | SILVER-AMI 30-day readmission calculator | Prospective cohort   | Yes         | Split      | 2004        | 1002  | AMI                  | 81.5 (5.0)               | 30d     | 18.2            |      |
| Kini et al. <sup>23</sup>       | NR                                       | Registry             | Yes         | Split      | 60742       | 26107 | AMI                  | 76.5 (8.0)               | 90d     | 27.5            |      |
| Nguyen et al. <sup>24</sup>     | AMI READMITS score                       | Retrospective cohort | Yes         | Split      | 661         | 165   | AMI                  | 65.5 (12.8)              | 30d     | 13              |      |
|                                 | Full-stay AMI model                      | Retrospective cohort | Yes         | Split      | 661         | 165   | AMI                  | 65.5 (12.8)              | 30d     | 13              |      |
|                                 | CMS AMI administrative model             | Retrospective cohort | NA          | Ext        | -           | 826   | AMI                  | 65.5 (12.8)              | 30d     |                 | 13   |

**Table 1. Study characteristics (continued)**

| Study                          | Model                               | Data source          | Development | Validation | Sample size |                         | Population     | Average age                      | Outcome | Readmission (%) |                          |
|--------------------------------|-------------------------------------|----------------------|-------------|------------|-------------|-------------------------|----------------|----------------------------------|---------|-----------------|--------------------------|
|                                |                                     |                      |             |            | Dev.        | Val.                    |                |                                  |         | Dev.            | Val.                     |
| Krumholz et al. <sup>25</sup>  | CMS AMI administrative model        | Registry             | Yes         | Split, Ext | 100465      | 321088                  | AMI            | 78.7 (8.0)                       | 30d     | 18.9            | 20.0 (Ext)<br>NR (split) |
|                                | CMS AMI medical model               | Registry             | Yes         | Split      | 130944      | 130944                  | AMI            | 76.2 (7.3)                       | 30d     | 20              |                          |
| Rana et al. <sup>26</sup>      | Elixhauser index                    | Hospital database    | NA          | Ext        | -           | 1660                    | AMI            | 67.9                             | 30d     |                 | 6.3                      |
|                                | HOSPITAL score                      | Hospital database    | NA          | Ext        | -           | 1660                    | AMI            | 67.9                             | 30d     |                 | 6.3                      |
| Atzema et al. <sup>27</sup>    | AFTER Part 2 scoring system         | Retrospective cohort | Yes         | Split      | 2343        | 1167                    | Arrhythmia, AF | D: 68.6 (14.7)<br>V: 68.3 (15.1) | 30d     | 7               | 7.6                      |
| Lahewala et al. <sup>28</sup>  | CHADS2                              | Administrative       | NA          | Ext        | -           | 116450                  | Arrhythmia, AF | <75                              | 30d     |                 | 15.8                     |
|                                | CHADS2                              | Administrative       | NA          | Ext        | -           | 116450                  | Arrhythmia, AF | <75                              | 90d     |                 | 25.1                     |
|                                | CHA2DS-VASc                         | Administrative       | NA          | Ext        | -           | 116450                  | Arrhythmia, AF | 65-74                            | 30d     |                 | 15.8                     |
|                                | CHA2DS-VASc                         | Administrative       | NA          | Ext        | -           | 116450                  | Arrhythmia, AF | 65-74                            | 90d     |                 | 25.1                     |
| Benezillo et al. <sup>29</sup> | CRSS                                | Hospital database    | Yes         | Boot, Ext  | 2589        | 896 (Ext)<br>500 (Boot) | CABG           | 66.7 (9.9)                       | 30d     | 9.1             | 8.2 (Ext)<br>9.1 (Boot)  |
| Deo et al. <sup>30</sup>       | 30-days CABG Readmission Calculator | Administrative       | Yes         | Boot       | 155054      | 1000                    | CABG           | 65.4 (10.4)                      | 30d     | 12.5            |                          |
| Engoren et al. <sup>31</sup>   | NR                                  | Hospital database    | Yes         | Split      | 2644        | 2711                    | CABG           | NR                               | 30d     | 7.6             | 8                        |
| Lancey et al. <sup>32</sup>    | NR                                  | Registry             | Yes         | Split      | 2341        | 2520                    | CABG           | 64.5 (10.5)                      | 30d     | 8.8             | 9.5                      |
| Rosenblum et al. <sup>33</sup> | The STS PROM score                  | Hospital database    | NA          | Ext        | -           | 21719                   | CABG           | 63.5 (10.7)                      | 30d     |                 | 9.3                      |

**Table 1. Study characteristics (continued)**

| Study                                | Model                                            | Data source        | Development | Validation | Sample size |        | Population | Average age          | Outcome | Readmission (%) |      |
|--------------------------------------|--------------------------------------------------|--------------------|-------------|------------|-------------|--------|------------|----------------------|---------|-----------------|------|
|                                      |                                                  |                    |             |            | Dev.        | Val.   |            |                      |         | Dev.            | Val. |
| Zitser-Gurevich et al. <sup>34</sup> | NR                                               | Prospective cohort | Yes         | Split      | 2266,5      | 2266,5 | CABG       | 65-74                | 30d     | 13.3            |      |
|                                      | NR                                               | Prospective cohort | Yes         | Split      | 2266,5      | 2266,5 | CABG       | 65-74                | 100d    | 24.1            |      |
| Zywot et al. <sup>35</sup>           | CABG Risk Scale                                  | Administrative     | Yes         | Ext        | 126519      | 94318  | CABG       | D: 70-74<br>V: 70-74 | 30d     | 23              | 21   |
| Ahmad et al. <sup>36</sup>           | CMS HF administrative model                      | Prospective cohort | NA          | Ext        | -           | 183    | HF         | 61 [18]              | 30d     | 22.4            |      |
| Amarasingham et al. <sup>37</sup>    | ADHERE                                           | Hospital database  | NA          | Ext        | -           | 1372   | HF         | 56.5                 | 30d     | 24.1            |      |
|                                      | CMS HF administrative model                      | Hospital database  | NA          | Ext        | -           | 1372   | HF         | 56.5                 | 30d     | 24.1            |      |
|                                      | Tabak mortality score                            | Hospital database  | NA          | Ext        | -           | 1372   | HF         | 56.5                 | 30d     | 24.1            |      |
| Au et al. <sup>38</sup>              | Administrative Claims Model: HF 30-day mortality | Administrative     | NA          | Ext        | 59652       | 59652  | HF         | 75.8 (12.7)          | 30d     | 15.9            |      |
|                                      | Charlson Comorbidity Score                       | Administrative     | NA          | Ext        | 59652       | 59652  | HF         | 75.8 (12.7)          | 30d     | 15.9            |      |
|                                      | CMS HF administrative model                      | Administrative     | NA          | Ext        | 59652       | 59652  | HF         | 75.8 (12.7)          | 30d     | 15.9            |      |
|                                      | LACE                                             | Administrative     | NA          | Ext        | 59652       | 59652  | HF         | 75.8 (12.7)          | 30d     | 15.9            |      |
| Bardhan et al. <sup>39</sup>         | NR                                               | Hospital database  | Yes         | No         | 40983       | -      | HF         | 69.2 (15.7)          | 30d     | 7               |      |



1  
2  
3  
4  
5  
6  
7  
8  
9  
10  
11  
12  
13  
14  
15  
16  
17  
18  
19  
20  
21  
22  
23  
24  
25  
26  
27  
28  
29  
30  
31  
32  
33  
34  
35  
36  
37  
38  
39  
40  
41  
42  
43  
44  
45  
46

**Table 1. Study characteristics (continued)**

| Study                          | Model                            | Data source            | Development | Validation | Sample size |       | Population | Average age  | Outcome | Readmission (%) |      |
|--------------------------------|----------------------------------|------------------------|-------------|------------|-------------|-------|------------|--------------|---------|-----------------|------|
|                                |                                  |                        |             |            | Dev.        | Val.  |            |              |         | Dev.            | Val. |
| Betihavas et al. <sup>40</sup> | NR                               | RCT secondary analysis | Yes         | Boot       | 280         | 200   | HF         | 74 [64 - 81] | 28d     |                 | 18   |
| Cox et al. <sup>41</sup>       | CMS HF administrative model      | Hospital database      | No          | Ext        | -           | 1454  | HF         | 75 (12)      | 30d     |                 | 21.5 |
|                                | CMS HF medical model             | Hospital database      | No          | Ext        | -           | 1454  | HF         | 75 (12)      | 30d     |                 | 21.5 |
| Delgado et al. <sup>42</sup>   | 15-day CV readmission risk score | Prospective cohort     | Yes         | Boot       | 1831        | 500   | HF         | 72.4 (12.1)  | 15d     |                 | 7.1  |
|                                | 30-day CV readmission risk score | Prospective cohort     | Yes         | Boot       | 1831        | 500   | HF         | 72.4 (12.1)  | 30d     |                 | 13.9 |
| Formiga et al. <sup>43</sup>   | CMS HF medical model             | Hospital database      | NA          | Ext        | -           | 719   | HF         | 78.1 (9)     | 30d     |                 | 7.6  |
|                                | CMS HF medical model             | Hospital database      | NA          | Ext        | -           | 719   | HF         | 78.1 (9)     | 90d     |                 | 14.4 |
| Frizzell et al. <sup>44</sup>  | CMS HF administrative model      | Registry               | NA          | External   | -           | 56477 | HF         | 80 [2]       | 30d     |                 | 21.2 |
| Hammill et al. <sup>45</sup>   | CMS HF administrative model      | Registry               | NA          | Ext        | -           | 24163 | HF         | 81           | 30d     |                 | 21.9 |
| Hilbert et al. <sup>21</sup>   | HF decision tree                 | Registry               | Yes         | Ext        | 39682       | 38409 | HF         | NR           | 30d     |                 | 25.5 |
| Hummel et al. <sup>46</sup>    | CMS HF medical model             | Prospective cohort     | NA          | Ext        | -           | 1807  | HF         | 79.8 (7.6)   | 30d     |                 | 27   |

**Table 1. Study characteristics (continued)**

| Study                         | Model                            | Data source          | Development | Validation  | Sample size |        | Population | Average age                      | Outcome | Readmission (%)       |                          |
|-------------------------------|----------------------------------|----------------------|-------------|-------------|-------------|--------|------------|----------------------------------|---------|-----------------------|--------------------------|
|                               |                                  |                      |             |             | Dev.        | Val.   |            |                                  |         | Dev.                  | Val.                     |
| Huynh et al. <sup>47</sup>    | NR                               | Prospective cohort   | Yes         | Ext         | 430         | 1046   | HF         | D: 75 [19]<br>V: 67 [17]         | 30d     | 21                    | 24                       |
| Ibrahim et al. <sup>48</sup>  | HOSPITAL score                   | Retrospective cohort | NA          | Ext         | -           | 692    | HfpEF      | 68.3 (11.8)                      | 30d     |                       | 27.3                     |
|                               | LACE / LACE+ index               | Retrospective cohort | NA          | Ext         | -           | 692    | HfpEF      | 68.3 (11.8)                      | 30d     |                       | 27.3                     |
| Keenan et al. <sup>49</sup>   | CMS HF administrative model      | Registry             | Yes         | Split, Ext. | 28319       | 845291 | HF         | 79.9 (7.8)                       | 30d     | 23.6                  | 23.7 (Ext)<br>NR (Split) |
|                               | CMS HF medical model             | Registry             | Yes         | Split, Ext. | 64329       | 64329  | HF         | 75-84                            | 30d     | 23.7                  |                          |
| Kitamura et al. <sup>50</sup> | FIM                              | Retrospective cohort | NA          | Ext         | -           | 113    | HF         | 80.5 (6.7)                       | 90d     |                       | 20.4                     |
| Leong et al. <sup>51</sup>    | 30-day HF readmission risk score | Retrospective cohort | Yes         | Split       | 888         | 587    | HF         | D: 70.0 (12.7)<br>V: 69.1 (12.8) | 30d     | 9.9                   |                          |
| Li et al. <sup>52</sup>       | NR                               | Retrospective cohort | Yes         | Split       | 51783       | 25887  | HF         | D: 84 [12]<br>V: 84[11]          | 30d     | 24.2                  |                          |
| Lim et al. <sup>53</sup>      | NR                               | Registry             | Yes         | No          | 4566        | -      | HF         | 70.5 (12.0)                      | 30d     | 6.6 (car)<br>13 (all) |                          |
| Reed et al. <sup>54</sup>     | AH model                         | Administrative       | Yes         | Split       | NR          | NR     | HF         | NR                               | 30d     | NR                    |                          |
|                               | CMS HF administrative model      | Administrative       | NA          | Split       | -           | NR     | HF         | NR                               | 30d     |                       | NR                       |
|                               | Hasan                            | Administrative       | NA          | Split       | -           | NR     | HF         | NR                               | 30d     |                       | NR                       |
|                               | LACE                             | Administrative       | NA          | Split       | -           | NR     | HF         | NR                               | 30d     |                       | NR                       |
|                               | PARR-30                          | Administrative       | NA          | Split       | -           | NR     | HF         | NR                               | 30d     |                       | NR                       |

**Table 1. Study characteristics (continued)**

| Study                                  | Model                       | Data source                              | Development | Validation | Sample size |                      | Population  | Average age                      | Outcome | Readmission (%) |                       |
|----------------------------------------|-----------------------------|------------------------------------------|-------------|------------|-------------|----------------------|-------------|----------------------------------|---------|-----------------|-----------------------|
|                                        |                             |                                          |             |            | Dev.        | Val.                 |             |                                  |         | Dev.            | Val.                  |
| Salah et al. <sup>55</sup>             | ELAN-HF score               | Prospective cohort<br>secondary analysis | Yes         | No         | 1301        | -                    | HF          | 74 [16]                          | 180d    | 36.1            |                       |
| Sudhakar et al. <sup>56</sup>          | CMS HF medical model        | Hospital database                        | NA          | Ext        | -           | 1046                 | HF          | 65.2 (16.6)                      | 30d     |                 | 35.3                  |
| Tan et al. <sup>57</sup>               | NR                          | Hospital database                        | Yes         | Split      | 246         | 104                  | HF          | D: 67.7 (12.3)<br>V: 69.0 (12.9) | 90d     | 24.5            | 11.7                  |
| Wang et al. <sup>58</sup>              | NR                          | Hospital database                        | Yes         | No         | 4548        | -                    | HF          | 68.5 [27.6]                      | 30d     | 25.1            |                       |
| Wang et al. <sup>59</sup>              | LACE                        | Retrospective cohort                     | NA          | Ext        | -           | 253                  | HF          | 56.6 (11.5)                      | 30d     |                 | 24.5                  |
| Yazdan-Ashoori et al. <sup>60</sup>    | CMS HF administrative model | Prospective cohort                       | NA          | Ext        | -           | 378                  | HF          | 73.1 (13.1)                      | 30d     |                 | 26                    |
|                                        | LACE                        | Prospective cohort                       | NA          | Ext        | -           | 378                  | HF          | 73.1 (13.1)                      | 30d     |                 | 26                    |
| Disdier Moulder et al. <sup>61</sup>   | NR                          | Prospective cohort                       | Yes         | No         | 258         |                      | HF, ACS, NR | 70.5 [23]                        | 30d     | 17              |                       |
|                                        | NR                          | Prospective cohort                       | Yes         | No         | 258         |                      | HF, ACS, NR | 70.5 [23]                        | 180d    | 38              |                       |
| Raposeiras-Roubín et al. <sup>62</sup> | GRACE                       | Retrospective cohort                     | NA          | Ext        | -           | 4229                 | HF, ACS     | 68.2 [18.7]                      | 30d     |                 | 2.6                   |
| Burke et al. <sup>63</sup>             | HOSPITAL score              | Retrospective cohort                     | NA          | Ext        | -           | HF: 3189<br>AMI: 767 | HF, AMI     | 65.8 (16.8)                      | 30d     |                 | HF: 18.2<br>AMI: 17.4 |
| Minges et al. <sup>64</sup>            | NR                          | Registry                                 | Yes         | Split      | 193899      | 194179               | HF, PCI     | 65+                              | 30d     | 11.4            |                       |
| Pack et al. <sup>65</sup>              | NR                          | Administrative                           | Yes         | Split      | 30826       | 7706                 | HVD         | 64.9 (12.2)                      | 90d     | 12.8            |                       |

**Table 1. Study characteristics (continued)**

| Study                              | Model                                          | Data source          | Development | Validation | Sample size |                     | Population  |                              | Average age | Outcome | Readmission (%) |                        |
|------------------------------------|------------------------------------------------|----------------------|-------------|------------|-------------|---------------------|-------------|------------------------------|-------------|---------|-----------------|------------------------|
|                                    |                                                |                      |             |            | Dev.        | Val.                |             |                              |             |         | Dev.            | Val.                   |
| Oliver-McNeil et al. <sup>66</sup> | ICD Readmission-Risk Score                     | Registry             | Update      | Ext        | 182         | -                   | ICD         |                              | 69 (11)     | 30d     |                 | 17.6                   |
| Wasfy et al. <sup>67</sup>         | Pre-PCI model                                  | Registry             | Yes         | Split      | 24052       | 12008               | NR          |                              | 64.8 (12.5) | 30d     | 10.4            |                        |
| Barnett et al. <sup>68</sup>       | NR                                             | Registry             | Update      | Ext        | 19964       | 19964               | Surgical    |                              | 65.3 (12.4) | 30d     | 11.4            |                        |
| Brown et al. <sup>69</sup>         | STS Augmented Clinical Model                   | Prospective cohort   | Update      | Boot       | 1046        |                     | NR Surgical |                              | 65.4 (9.8)  | 30d     |                 | NR                     |
|                                    | STS 30-day Readmission Model                   | Prospective cohort   | NA          | Ext        | -           | 1194                | Surgical    |                              | 73.3 (10.1) | 30d     |                 | NR                     |
| Espinoza et al. <sup>70</sup>      | 30-day readmission score after cardiac surgery | Retrospective cohort | Yes         | Split      | 2529        | 2567                | Surgical    |                              | 65.1 (11.5) | 30d     | 11.9            |                        |
| Ferraris et al. <sup>71</sup>      | READMIT                                        | Prospective cohort   | Yes         |            | 2574        |                     | Surgical    |                              | 63 (11)     | 30d     | 9.8             |                        |
| Kilic et al. <sup>72</sup>         | NR                                             | Retrospective cohort | Yes         | Split      | 3898        | 1295                | Surgical    | D:61.9 (14.7) V: 61.6 (15.1) |             | 30d     | 10              | 11                     |
| Stuebe et al. <sup>73</sup>        | NR                                             | Hospital database    | Yes         | No         | 4800        |                     | Surgical    |                              | 60-69       | 30d     | 12              |                        |
| Tam et al. <sup>74</sup>           | NR                                             | Retrospective cohort | Yes         | Boot       | 63336       | NR                  | Surgical    |                              | 66.2 (10.7) | 30d     | 11.3            |                        |
| Khera et al. <sup>75</sup>         | TAVR 30-Day Readmission Risk Model             | Administrative       | Yes         | Boots, Ext | 39305       | 40 (Boot) 885 (Ext) | TAVR        | D: 81.3 V: 81.7              |             | 30d     | 16.2            | 16.2 (Boot) 18.9 (Ext) |
| Sanchez et al. <sup>76</sup>       | NR                                             | Registry             | Yes         | Split      | 6903        | 3442                | TAVR        | D: 81.1 (7.9) V: 81.3 (7.9)  |             | 30d     | 9.8             | 10.7                   |

**Abbreviations:**

ACS: acute coronary syndrome, AF: atrial fibrillation, AH: Adventist hospitals, Boot: bootstrapping, CABG: coronary artery bypass grafting, Car: cardiac-related, CMS=centers for Medicare and Medicaid services, CRSS: CABG Readmission Risk Score, d: days, Dev: development, Ext: external validation, Fim: motor and cognitive Functional Independence Measure, HF: heart failure, HFpEF: heart failure with preserved ejection fraction, HVD: heart valve disease, ICD: implantable cardioverter defibrillator, NA: not applicable, NR: not reported, PARR-30: Patients at Risk of Re-admission within 30-days, PCI: percutaneous coronary intervention, SD: standard deviation, Split: random split, TAVR: transcatheter aortic valve replacement, Val: validation

Legend: Age is reported as mean (SD), median [IQR] or average age as reported in the study.

## Risk of bias

Figure 2 summarizes the RoB and applicability assessment (Supplemental Table 1). The overall RoB was high in 98.9% of the models and only one study<sup>22</sup> showed low RoB in all four domains.

For the domain participants, 82.4% of studies was assessed as high RoB because most studies performed retrospective data analyses or used data from existing sources with large number of candidate predictors that were originally developed for other purposes, e.g. administrative databases or registries. The domain predictors was assessed as high RoB in 27.5% of the models, 24.2% as low RoB and 48.4% as unclear RoB. For the domain outcome, 41.8%, 34.1% and 24.2% were assessed as high, low and unclear RoB respectively.

The domain analysis was assessed as high RoB in 97.8%. Most studies did not use appropriate statistics for the development or validation of prediction models.

The domains participants and predictors were assessed as low concerns regarding applicability in all studies. For the domain outcome, 70.3% of studies used all-cause readmission as the outcome of interest and were therefore assessed as low concerns regarding applicability.

## Prediction models

A total of 43 new models were developed for patients with HF (n=15), undergoing surgical procedures (n=12), AMI (n=9), transcatheter aortic valve replacement (TAVR) (n=2), a mixed sample with HF and coronary syndromes (n=2), arrhythmias (n=1), valvular disease (n=1), while one study did not specify the sample (table 1). The c-statistic was lower than 0.6 in five models, between 0.6 and 0.7 in 24 models, between 0.7 and 0.8 in six models, and between 0.8 and 0.9 in two models. In six models, the c-statistic was only reported for a validation cohort (table 2).

1  
2  
3 A total of 38 separate models were externally validated for patients with HF (n=26), AMI  
4 (n=4), surgical patients (n=3), acute coronary syndrome (n=2), arrhythmias (n=2), mixed  
5  
6 sample with HF and coronary syndromes (n=1). The discrimination was lower than 0.6 in  
7  
8 sixteen models, between 0.6 and 0.7 in fifteen models, between 0.7 and 0.8 in five models, and  
9  
10 between 0.8 and 0.9 in two models (Table 2).  
11  
12  
13  
14

15 The discrimination of six models was evaluated in multiple independent cohorts and was  
16  
17 pooled in meta-analyses (Figure 3, Supplemental Figures 1-6): the CMS AMI administrative  
18  
19 model<sup>24,25</sup> (0.65, 95% CI 0.56-0.73); the CMS HF administrative model<sup>36-38,41,44,45,49,54,60</sup> (0.60,  
20  
21 95% CI 0.58-0.62); the CMS HF medical model<sup>41,43,46,49,56</sup> (0.60, 95% CI 0.58-0.62); the  
22  
23 HOSPITAL score<sup>26,48,63</sup> (0.64, 95% CI 0.58-0.70); the GRACE score<sup>20,62</sup> (0.78, 95% CI 0.63-  
24  
25 0.86); and the LACE score<sup>38,48,54,59,60</sup> (0.62, 95% CI 0.53-0.70).  
26  
27  
28  
29

30 On average, models for AMI patients had the best discrimination (0.67, n=16), followed by  
31  
32 TAVR patients (0.65, n=2), HF patients (0.64, n=45), and surgical patients (0.63, n=17). The  
33  
34 discrimination was highest in studies using secondary analysis (0.70, n=2) and retrospective  
35  
36 cohort studies (0.69, n=23), and was lowest in studies using registries (0.61, n=17) and hospital  
37  
38 databases (0.61, n=18). The discrimination decreased when the number of predictors increased  
39  
40 (beta -0.002, n=90). There were no moderation effects based on the average age of the sample,  
41  
42 outcome definition and endpoint of the prediction (Supplemental Figures 7-8 and  
43  
44 Supplemental Table 2).  
45  
46  
47  
48

49 The calibration was reported for 27 models using multiple measures and could not be pooled  
50  
51 (Table 2).  
52  
53  
54  
55  
56  
57  
58  
59  
60

**Table 2. Model discrimination and calibration**

| Study                           | Model                                    | Setting              | Predictors, n | Cohort                    | Discrimination                            | Type calibration      | Calibration                          |
|---------------------------------|------------------------------------------|----------------------|---------------|---------------------------|-------------------------------------------|-----------------------|--------------------------------------|
| Moretti et al. <sup>17</sup>    | EuroHeart PCI score                      | ACS                  | 16            | External                  | 0.59 (0.48 - 0.71)                        | NA                    |                                      |
| Asche et al. <sup>18</sup>      | NR                                       | AMI                  | 19            | Development, random split | 0.74, NR                                  | NA                    |                                      |
| Cediel et al. <sup>19</sup>     | TARRACO Risk Score                       | AMI type 2, ischemia | 7             | Development (30d)         | 0.71 (0.61 - 0.82)                        | NA                    |                                      |
|                                 |                                          | AMI type 2, ischemia | 7             | Development (180d)        | 0.71 (0.64 - 0.78)                        | NA                    |                                      |
| Burke et al. <sup>63</sup>      | HOSPITAL score                           | AMI                  | 7             | External                  | 0.66 (0.61 - 0.71)                        | HLT                   | p=0.49                               |
| Chotechuan et al. <sup>20</sup> | GRACE                                    | AMI                  | 9             | External (30d)            | 0.77 (0.65 - 0.88)                        | NA                    |                                      |
|                                 | GRACE                                    | AMI                  | 9             | External (180d)           | 0.63 (0.49 - 0.77)                        | NA                    |                                      |
| Hilbert et al. <sup>21</sup>    | AMI decision tree                        | AMI                  | 44            | Development, External     | 0.65 (0.64 - 0.66),<br>0.61 (0.61 - 0.62) | NA                    |                                      |
| Dodson et al. <sup>22</sup>     | SILVER-AMI 30-day readmission calculator | AMI                  | 10            | Development, random split | 0.65, 0.63                                | HLT                   | p>0.05, p=0.05                       |
| Kini et al. <sup>23</sup>       | NR                                       | AMI                  | 12            | Development, random split | NR, 0.66                                  | Slope, in large, plot | 0.973 (p=0.330),<br>-0.038 (p=0.221) |
| Nguyen et al. <sup>24</sup>     | AMI READMITS score                       | AMI                  | 7             | Development, random split | 0.75 (0.70 - 0.80),<br>0.73 (0.71 - 0.74) | Plot, Plot            |                                      |
|                                 | Full-stay AMI model                      | AMI                  | 10            | Development, random split | 0.78 (0.74 - 0.83),<br>0.75 (0.74 - 0.76) | Plot                  |                                      |
|                                 | CMS AMI administrative model             | AMI                  | 32            | External                  | 0.74 (0.69 - 0.74)                        | Plot                  |                                      |



**Table 2. Model discrimination and calibration (continued)**

| Study                          | Model                               | Setting        | Predictors,<br>n | Cohort                              | Discrimination                            | Type calibration | Calibration                          |
|--------------------------------|-------------------------------------|----------------|------------------|-------------------------------------|-------------------------------------------|------------------|--------------------------------------|
| Krumholz et al. <sup>25</sup>  | CMS AMI administrative model        | AMI            | 32               | Development, external, random split | 0.63, 0.63, 0.62                          | In large, slope  |                                      |
|                                | CMS AMI medical model               | AMI            | 45               | Development, random split           | 0.58, 0.59                                | NA               | 0, 1 / 0.015, 0.997/<br>0.015, 0.983 |
| Rana et al. <sup>26</sup>      | Elixhauser index                    | AMI            | 30               | External                            | 0.53 (0.42 - 0.65)                        | NA               |                                      |
|                                | HOSPITAL score                      | AMI            | 7                | External                            | 0.60 (0.47 - 0.73)                        | NA               |                                      |
| Atzema et al. <sup>27</sup>    | AFTER Part 2 scoring system         | Arrhythmia, AF | 12               | Development                         | 0.69, NR                                  | NA               |                                      |
| Lahewala et al. <sup>28</sup>  | CHADS2                              | Arrhythmia, AF | 5                | External (30d)                      | 0.64                                      | NA               |                                      |
|                                | CHADS2                              | Arrhythmia, AF | 5                | External (90d)                      | 0.63                                      | NA               |                                      |
|                                | CHA2DS-VASc                         | Arrhythmia, AF | 9                | External (30d)                      | 0.65                                      | NA               |                                      |
|                                | CHA2DS-VASc                         | Arrhythmia, AF | 9                | External (90d)                      | 0.63                                      | NA               |                                      |
| Benuzillo et al. <sup>29</sup> | CRSS                                | CABG           | 5                | Development, bootstrapping          | 0.63, 0.63                                | HLT              | 7.13 (p=0.52),<br>9.31 (p=0.32)      |
| Deo et al. <sup>30</sup>       | 30-days CABG Readmission Calculator | CABG           | 20               | Development                         | 0.65                                      | NA               |                                      |
| Engoren et al. <sup>31</sup>   | NR                                  | CABG           | 6                | Development, random split           | 0.68 (0.64 - 0.72),<br>0.68 (0.64 - 0.68) | NA               |                                      |
| Lancey et al. <sup>32</sup>    | NR                                  | CABG           | 8                | Development, random split           | 0.64, 0.57                                | NA               |                                      |
| Rosenblum et al. <sup>33</sup> | The STS PROM score                  | CABG           | 40               | External                            | 0.59 (0.57 - 0.60)                        | NA               |                                      |

**Table 2. Model discrimination and calibration (continued)**

| Study                                | Model                                            | Setting | Predictors,<br>n | Cohort                      | Discrimination     | Type calibration | Calibration   |
|--------------------------------------|--------------------------------------------------|---------|------------------|-----------------------------|--------------------|------------------|---------------|
| Zitser-Gurevich et al. <sup>34</sup> | NR                                               | CABG    | 17               | Development, external (30d) | 0.63, 0.66/0.63    | HLT              | 7.91 (p=0.44) |
|                                      | NR                                               | CABG    | 13               | Development (100d)          | 0.65               | HLT              | 6.76 (p=0.56) |
| Zywot et al. <sup>35</sup>           | CABG Risk Scale                                  | CABG    | 27               | Development, external       | NR, 0.70           | Plot             |               |
| Ahmad et al. <sup>36</sup>           | CMS HF administrative model                      | HF      | 37               | External                    | 0.66 (0.57 - 0.76) | HLT              | p=0.19        |
| Amarasingham et al. <sup>37</sup>    | ADHERE                                           | HF      | 3                | External                    | 0.56 (0.54 - 0.59) | NA               |               |
|                                      | CMS HF administrative model                      | HF      | 37               | External                    | 0.66 (0.63 - 0.68) | NA               |               |
| Au et al. <sup>38</sup>              | Tabak mortality score                            | HF      | 18               | External                    | 0.61 (0.59 - 0.64) | NA               |               |
|                                      | Administrative Claims Model: HF 30-day mortality | HF      | 17               | External                    | 0.58 (0.58 - 0.59) | NA               |               |
|                                      | Charlson Comorbidity Score                       | HF      | 32               | External                    | 0.55 (0.55- 0.56)  | NA               |               |
|                                      | CMS HF administrative model                      | HF      | 37               | External                    | 0.59 (0.59 - 0.60) | NA               |               |
|                                      | LACE                                             | HF      | 18               | External                    | 0.58 (0.58 - 0.59) | NA               |               |
| Bardhan et al. <sup>39</sup>         | NR                                               | HF      | 30               | Development                 | 0.56               | NA               |               |
| Betihavas et al. <sup>40</sup>       | NR                                               | HF      | 7                | Development, bootstrapping  | NR, 0.80           | NA               |               |
| Burke et al. <sup>63</sup>           | HOSPITAL score                                   | HF      | 7                | External                    | 0.67 (0.65 - 0.70) | HLT              | p=0.10        |

**Table 2. Model discrimination and calibration (continued)**

| Study                         | Model                            | Setting | Predictors, n | Cohort                      | Discrimination                            | Type calibration | Calibration |
|-------------------------------|----------------------------------|---------|---------------|-----------------------------|-------------------------------------------|------------------|-------------|
| Cox et al. <sup>41</sup>      | CMS HF administrative model      | HF      | 37            | External                    | 0.61                                      | NA               |             |
|                               | CMS HF medical model             | HF      | 20            | External                    | 0.60                                      | NA               |             |
| Delgado et al. <sup>42</sup>  | 15-day CV readmission risk score | HF      | 5             | Development, bootstrapping  | 0.65, 0.63                                | Plot             |             |
|                               | 30-day CV readmission risk score | HF      | 11            | Development, bootstrapping  | 0.66, 0.64                                | Plot             |             |
| Formiga et al. <sup>43</sup>  | CMS HF medical model             | HF      | 19            | External (30d)              | 0.65 (0.57 - 0.72)                        | NA               |             |
|                               | CMS HF medical model             | HF      | 19            | External (90d)              | 0.62 (0.56 - 0.68)                        | NA               |             |
| Frizzell et al. <sup>44</sup> | CMS HF administrative model      | HF      | 37            | External                    | 0.60                                      | NA               |             |
| Hammill et al. <sup>45</sup>  | CMS HF administrative model      | HF      | 37            | External                    | 0.59                                      | Plot             |             |
| Hilbert et al. <sup>21</sup>  | HF decision tree                 | HF      | 44            | Development, External       | 0.59 (0.58 - 0.60),<br>0.58 (0.58 - 0.59) | NA               |             |
| Hummel et al. <sup>46</sup>   | CMS HF medical model             | HF      | 28            | External                    | 0.61                                      | NA               |             |
| Huynh et al. <sup>47</sup>    | NR                               | HF      | 12            | Development, external (30d) | 0.82 (0.76 - 0.87),<br>0.73 (0.69 - 0.77) | NA               |             |
|                               | NR                               | HF      | 12            | Development, external (90d) | NR, 0.65                                  | NA               |             |

**Table 2. Model discrimination and calibration (continued)**

| Study                         | Model                            | Setting | Predictors,<br>n | Cohort                              | Discrimination                            | Type calibration | Calibration                                 |
|-------------------------------|----------------------------------|---------|------------------|-------------------------------------|-------------------------------------------|------------------|---------------------------------------------|
| Ibrahim et al. <sup>48</sup>  | HOSPITAL score                   | HfpEF   | 7                | External                            | 0.60 (0.55 - 0.64)                        | NA               |                                             |
|                               | LACE                             | HfpEF   | 18               | External                            | 0.55 (0.50 - 0.60)                        | NA               |                                             |
|                               | LACE+ index                      | HfpEF   | 24               | External                            | 0.57 (0.52 - 0.62)                        | NA               |                                             |
| Keenan et al. <sup>49</sup>   | CMS HF administrative model      | HF      | 37               | Development, external, random split | 0.60, 0.60, 0.61                          | In large, slope  | 0, 1 / 0.02, 1.01 / 0.09, 1.05              |
|                               | CMS HF medical model             | HF      | 30               | Development, random split           | 0.58, 0.61                                | In large, slope  | 0, 1 / 0, 1                                 |
| Kitamura et al. <sup>50</sup> | FIM                              | HF      | 13               | External                            | 0.78                                      | NA               |                                             |
| Leong et al. <sup>51</sup>    | 30-day HF readmission risk score | HF      | 7                | Development, random split           | 0.76, 0.76                                | NA               |                                             |
| Li et al. <sup>52</sup>       | NR                               | HF      | 10               | Development, random split           | 0.63 (0.62 - 0.63)<br>0.63 (0.62 - 0.63)  | HLT, plot        | 0.15 (p>0.005)                              |
| Lim et al. <sup>53</sup>      | NR                               | HF      | 13               | Development                         | 0.68 (car), 0.62 (all)                    | HLT              | 27.5 (p=0.001) (car)<br>8.0 (p=0.429) (all) |
| Reed et al. <sup>54</sup>     | AH model                         | HF      | 14               | Development, random split           | 0.86 (0.85 - 0.86),<br>0.85 (0.84 - 0.86) | NA               |                                             |
|                               | CMS HF administrative model      | HF      | 37               | Random split                        | 0.55 (0.54 - 0.56)<br>0.55 (0.54 - 0.57)  | NA               |                                             |
|                               | Hasan                            | HF      | 9                | Random split                        | 0.80 (0.79 - 0.81)<br>0.80 (0.80 - 0.82)  | NA               |                                             |
|                               | LACE                             | HF      | 18               | Random split                        | 0.75 (0.74 - 0.81)<br>0.74 (0.73 - 0.76)  | NA               |                                             |

**Table 2. Model discrimination and calibration (continued)**

| Study                                    | Model                       | Setting     | Predictors,<br>n | Cohort                    | Discrimination                                                                       | Type calibration | Calibration |
|------------------------------------------|-----------------------------|-------------|------------------|---------------------------|--------------------------------------------------------------------------------------|------------------|-------------|
| Reed et al. <sup>54</sup><br>(continued) | PARR-30                     | HF          | 10               | Random split              | 0.82 (0.81 - 0.83)<br>0.81 (0.80 - 0.82)                                             | NA               |             |
| Salah et al. <sup>55</sup>               | ELAN-HF score               | HF          | 10               | Development               | 0.60 (0.56 - 0.64)                                                                   | NA               |             |
| Sudhakar et al. <sup>56</sup>            | CMS HF medical model        | HF          | 20               | External                  | 0.61 (0.57-0.64)<br>≥65y: 0.59 (0.53-0.64)<br>Random patient-level: 0.58 (0.50-0.65) | NA               |             |
| Tan et al. <sup>57</sup>                 | NR                          | HF          | 3                | Random split              | 0.73                                                                                 | HLT, plot        | p=0.62      |
| Wang et al. <sup>58</sup>                | NR                          | HF          | 12               | Development               | 0.65                                                                                 | NA               |             |
| Wang et al. <sup>59</sup>                | LACE                        | HF          | 18               | External                  | 0.56 (0.48 - 0.64)                                                                   | NA               |             |
| Yazdan-Ashoori et al. <sup>60</sup>      | CMS HF administrative model | HF          | 37               | External                  | 0.61 (0.55 - 0.67)                                                                   | NA               |             |
|                                          | LACE                        | HF          | 18               | External                  | 0.59 (0.52 - 0.65)                                                                   | HLT              | p=0.73      |
| Disdier Moulder et al. <sup>61</sup>     | NR                          | HF, ACS, NR | 4                | Development (30d)         | 0.68                                                                                 | NA               |             |
|                                          | NR                          | HF, ACS, NR | 5                | Development (180d)        | 0.69                                                                                 | NA               |             |
| Raposeiras-Roubín et al. <sup>62</sup>   | GRACE                       | HF, ACS     | 9                | External                  | 0.74 (0.73-0.80)                                                                     | HLT              | p=0.14      |
| Minges et al. <sup>64</sup>              | NR                          | HF, PCI     | 35               | Development, random split | 0.67, 0.66                                                                           | NA               |             |

**Table 2. Model discrimination and calibration (continued)**

| Study                              | Model                                          | Setting  | Predictors,<br>n | Cohort                                                       | Discrimination                                            | Type calibration                       | Calibration      |
|------------------------------------|------------------------------------------------|----------|------------------|--------------------------------------------------------------|-----------------------------------------------------------|----------------------------------------|------------------|
| Pack et al. <sup>65</sup>          | NR                                             | HVD      | 28               | Development,<br>random split                                 | 0.67 (full dev.)/<br>0.65 (nomogram),<br>0.67 (full val.) | Harrell's E, O:E,<br>Harrell's E, plot | 0.1%, 1.9%, 1.6% |
| Oliver-McNeil et al. <sup>66</sup> | ICD Readmission-Risk Score                     | ICD      | 4                | Update, External                                             | 0.69 (0.58 - 0.79)                                        | HLT, plot                              | 3.44 (p=0.49)    |
| Wasfy et al. <sup>67</sup>         | Pre-PCI model                                  | NR       | 23               | Development,<br>random split                                 | 0.68, 0.67                                                | HLT, plot                              | p=0.59           |
| Barnett et al. <sup>68</sup>       | NR validation                                  | Surgical | 15               | External                                                     | 0.59                                                      | NA                                     |                  |
|                                    | NR update                                      | Surgical | 18               | Update                                                       | 0.60 (0.59 - 0.62)                                        | NA                                     |                  |
| Brown et al. <sup>69</sup>         | STS Augmented Clinical Model                   | Surgical | 27               | Update (bootstrap),<br>random split,<br>external (bootstrap) | 0.66 (0.61 - 0.72),<br>0.56,<br>0.47 (0.42 - 0.53)        | HLT                                    | p=1.0            |
|                                    | STS 30-day Readmission Model                   | Surgical | 21               | Update (bootstrap),<br>random split,<br>external (bootstrap) | 0.66 (0.62 - 0.71),<br>0.58,<br>0.47 (0.41 - 0.52)        | HLT                                    | p=0.492          |
| Espinoza et al. <sup>70</sup>      | 30-day readmission score after cardiac surgery | Surgical | 5                | Development,<br>random split                                 | 0.66 (0.63 - 0.70),<br>0.64 (0.61 - 0.67)                 | NA                                     |                  |

**Table 2. Model discrimination and calibration (continued)**

| Study                         | Model                                 | Setting  | Predictors,<br>n | Cohort                                    | Discrimination | Type calibration         | Calibration          |
|-------------------------------|---------------------------------------|----------|------------------|-------------------------------------------|----------------|--------------------------|----------------------|
| Ferraris et al. <sup>71</sup> | READMIT                               | Surgical | 9                | Development                               | 0.70           | HLT                      | 5.966 (p=0.651)      |
| Kilic et al. <sup>72</sup>    | NR                                    | Surgical | 15               | Development,<br>random split              | NR, 0.64       | HLT, plot                | p=0.45, p=0.57       |
| Stuebe et al. <sup>73</sup>   | NR                                    | Surgical | 7                | Development                               | 0.63           | NA                       |                      |
| Tam et al. <sup>74</sup>      | NR                                    | Surgical | 29               | Development,<br>bootstrapping             | 0.63, 0.65     | Plot                     |                      |
| Khera et al. <sup>75</sup>    | TAVR 30-Day Readmission<br>Risk Model | TAVR     | 11               | Development,<br>random split,<br>external | NR, 0.63, 0.69 | HLT, RMSE, RMSE,<br>plot | p=0.33, 0.978, 0.928 |
| Sanchez et al. <sup>76</sup>  | NR                                    | TAVR     | 10               | Development,<br>random split              | 0.61, 0.60     | HLT                      | p=0.749, p=0.403     |

**Abbreviations:** ACS: acute coronary syndrome, AF: atrial fibrillation, AH: Adventist hospitals, CABG: coronary artery bypass grafting, Car: cardiac-related, CMS=centers for Medicare and Medicaid services, CRSS: CABG Readmission Risk Score, d: days, dev: development, Fim: motor and cognitive Functional Independence Measure, HF: heart failure, HFpEF: heart failure with preserved ejection fraction, HLT: Hosmer-Lemeshow test, HVD: heart valve disease, ICD: implantable cardioverter defibrillator, NA: not applicable, NR: not reported, O:E: observed:expected, PARR-30: Patients at Risk of Re-admission within 30-days, PCI: percutaneous coronary intervention, plot: calibration plot, TAVR: transcatheter aortic valve replacement, val: validation.

## Predictors

A total of 766 predictor values were estimated in the included models. The median number of predictors per model was 15 (IQR=9–28). The predictors were mostly situated in the domains medical comorbidities (n=211), disease and hospital characteristics (n=128), demographic data (n=128), laboratory values (n=97), and medical history characteristics (n=51). Age (n=47), the presence of diabetes (n=26), insurance status (n=24), length of stay (n=28), and gender (n=23) were the most prevalent predictors. There was little consistency in the definition of predictors, and most studies did not report how they were measured.

Only 18 predictors were similarly defined in multiple studies and could be pooled for the outcome readmission at 30 days (Figure 4, Supplemental Table 3 and Supplemental Figures 9–26). The coefficients of four predictors demonstrated a consistent and significant association across the different samples: chronic obstructive pulmonary disease (COPD), history of HF, and valvular disease. The coefficients of eleven predictors demonstrated an overall significant association, i.e. age, female gender, arrhythmias, chronic lung disease, diabetes mellitus, cerebrovascular disease, cardiovascular accident, anemia, peripheral vascular disease, urgent admission, and infection, but this was not consistent across the samples and the prediction intervals were not significant. The effect of these predictors was mostly smaller in the HF samples.

The coefficients for most predictors could not be pooled because they had different definitions, cutoff values or reference categories. However, renal disease, including dialysis, a longer length of stay, creatinine, NT-proBNP, and previous hospital admissions demonstrated a consistent association with readmissions.



## Discussion

In this systematic review, we included 60 studies that reported the results from 81 separate clinical risk prediction models and 766 risk predictors for unplanned readmission in patients with acute heart disease. No clinical model demonstrated good discrimination (i.e. c-statistic > 0.8) in independently externally validated cohorts, regardless of the underlying patient populations. GRACE was the only model that demonstrated adequate discrimination in multiple cohorts in patients with acute coronary syndromes<sup>20,62</sup> and HF<sup>62</sup>, but the RoB was high. There was little consistency in the measurement of risk predictors.

The results of our review are in line with previous systematic reviews which have mainly focused on samples of patients with HF, AMI or focused on generic prediction models. All reviews confirm that the discrimination is generally low. Our review confirms the importance of previous HF<sup>4,5</sup> and previous hospital admissions<sup>5,7</sup> as consistent predictors for the risk of readmission. In addition two prevalent comorbidities, COPD and valve disease were also consistent predictors across the different populations. Other reviews also identified the importance of age, gender, comorbidities and certain laboratory values. These were also significant in our review but the association was not always consistent across the different populations or heterogeneously measured making comparisons difficult. As a result, no clinical risk prediction model or set of predictors that is relevant for different populations of heart disease could be identified.

Our review focused specifically on prediction models with a clinical presentation that can be used in daily practice, e.g. risk scores or nomograms. These simple models do not consider interactions between predictor values or nonlinear link functions in their predictions. This may partially explain the poor discrimination.<sup>77</sup> Using web applications or electronic patient records to run more complex prediction algorithms can likely offer a solution for future models. A recent systematic review observed an average c-statistic of 0.74 for models based using

1  
2  
3 electronic patient records and machine learning algorithms.<sup>10</sup> Our review included eleven  
4  
5 studies<sup>20,22,28,33,35,56,60,62,69,74,75</sup> that developed or validated electronic tools for risk prediction  
6  
7 and their discrimination ranged between 0.59 and 0.77. However, these electronic tools were  
8  
9 mostly derived from score charts and nomograms.  
10

11  
12 There are also concerns about the generalizability of the prediction models. The median age of  
13  
14 patients included in the samples was 68 years (IQR=65–75). However, older and frail patients  
15  
16 suffer more multimorbidity and geriatric syndromes, and the distribution of predictor and  
17  
18 outcome values will also be different than in younger samples. It is therefore unlikely that the  
19  
20 majority of the current models will hold their value in daily clinical practice where there is a  
21  
22 high prevalence of older patients. Only eight studies<sup>18,22,25,27,47,49,52,76</sup> included one or more  
23  
24 geriatric risk factors (e.g. physical performance, dementia) as predictors for readmission. The  
25  
26 performance of models including geriatric conditions was similar to models without these  
27  
28 conditions. This might be explained by the relative young mean age of the samples in our  
29  
30 review. Mahmoudi et al.<sup>10</sup> reported that functional and frailty status are important predictors,  
31  
32 but were only included in a small number of studies. Frailty was not identified in any of the  
33  
34 models in our review. It might be valuable to examine the additive value of these predictors in  
35  
36 prediction models for patients with heart disease.  
37  
38  
39  
40  
41

42 We observed high RoB in almost all clinical risk prediction models (98.8%). This was mainly  
43  
44 because the calibration was lacking or not fully reported (e.g. only p-value of Hosmer-  
45  
46 Lemeshow test). Furthermore, most studies performed retrospective data analyses or used data  
47  
48 from existing sources. However, our results demonstrate that studies using these data sources  
49  
50 had the lowest c-statistic, and that the c-statistic decreased when more predictors were tested.  
51  
52 Databases often have missing data, misclassification bias, and random measurement error,  
53  
54 which likely explains their average poor performance.<sup>78</sup> Only the SILVER-AMI study<sup>22</sup>  
55  
56  
57  
58  
59  
60

1  
2  
3 demonstrated low RoB on all domains. However, their readmission risk calculator for older  
4 AMI patients only discriminated modestly (c-statistic = 0.65).  
5

6  
7 Our review included many recent published studies that were not included in previous reviews  
8 and added some new perspective to the literature. Our results show the current state-of-the art  
9  
10 of risk prediction in patients with acute heart disease. The timely identification of patients with  
11  
12 acute heart disease at risk of readmission remains challenging with the prediction models  
13  
14 identified in this systematic review. Therefore, further research in risk prediction remains  
15  
16 important and some recommendations for further research can be derived from this review.  
17  
18 First, consistency is needed in the definition and measurement of predictors. More  
19  
20 homogeneity might improve the identification of important predictors and their effect on  
21  
22 readmission. Second, the results suggest that multiple predictors are associated with  
23  
24 readmissions regardless of the underlying population. Therefore, attention might be shifted  
25  
26 from developing new risk prediction models to updating and externally validating existing  
27  
28 prediction models in different populations with heart disease. Third, the applicability of current  
29  
30 prediction models in daily practice is an important concern as most models had poor  
31  
32 performance, were not replicated and had high RoB. More high-quality studies are needed that  
33  
34 evaluate the discrimination, calibration and clinical usefulness. To limit the risk of bias as much  
35  
36 as possible, future studies should adhere to the relevant reporting guidelines<sup>79</sup> and could use  
37  
38 PROBAST<sup>15</sup> as a guidance to plan their study. Third, Fourth, more complex models integrated  
39  
40 in electronic patient records may results in better predictions.  
41  
42  
43  
44  
45  
46  
47  
48  
49

### 50 **Limitations**

51  
52 Although we performed an extensive literature search, we might have missed some eligible  
53  
54 studies, particularly those published in non-English languages. We were able to perform meta-  
55  
56 analysis for predictors that were often ( $\geq 5$  models) reported. However, it might be possible  
57  
58 that some less frequently mentioned predictors (e.g. geriatric predictors) are a valuable addition  
59  
60

1  
2  
3 in clinical practice. The review included a large number of results and statistical tests which  
4  
5 may result in an inflated alpha error. The meta-regression identified that models with less  
6  
7 predictors had a better discrimination, but this could also be explained by overfitting models;  
8  
9 this could not be tested.  
10  
11

### 12 13 **Conclusion**

14  
15 A large number of clinical models have recently been developed. Although some models are  
16  
17 promising as they demonstrated adequate to good discrimination, no model can currently be  
18  
19 recommended for clinical practice. The lack of independently validated studies, high risk of  
20  
21 bias and low consistency in measured predictors limit their applicability. Model updating and  
22  
23 external validation is urgently needed.  
24  
25  
26  
27  
28  
29  
30  
31  
32  
33  
34  
35  
36  
37  
38  
39  
40  
41  
42  
43  
44  
45  
46  
47  
48  
49  
50  
51  
52  
53  
54  
55  
56  
57  
58  
59  
60

### Data statement section

All data relevant to the study are included in the article or uploaded as supplementary information.

### Author contributions

Bastiaan Van Grootven and Patricia Jepma had full access to all the data in the study and take responsibility for the integrity of the data and the accuracy of the data analysis. Bastiaan Van Grootven and Patricia Jepma contributed equally as first authors.

*Concept and design:* all authors; *Acquisition, analysis or interpretation of data:* Bastiaan Van Grootven, Patricia Jepma, Corinne Rijpkema, Mariska Leeflang, Joost Daams; *Drafting the manuscript:* Bastiaan Van Grootven, Patricia Jepma; *Critical revision of the manuscript:* all authors; *Analysis:* Bastiaan Van Grootven, Patricia Jepma; *Supervision:* Bianca Buurman.

### Funding

This work was partly supported by the Research Foundation Flanders (FWO) fellowship grant (BVG) and by the Dutch Research Council (NWO) [grant number 023.009.036 [PJJ]]. The funders had no role in the design and conduct of the study; collection, management, analysis, and interpretation of the data; preparation, review, or approval of the manuscript; and decision to submit the manuscript for publication.

### Conflict of interest

None declared.

## License statement

I, the Submitting Author has the right to grant and does grant on behalf of all authors of the Work (as defined in the below author licence), an exclusive licence and/or a non-exclusive licence for contributions from authors who are: i) UK Crown employees; ii) where BMJ has agreed a CC-BY licence shall apply, and/or iii) in accordance with the terms applicable for US Federal Government officers or employees acting as part of their official duties; on a worldwide, perpetual, irrevocable, royalty-free basis to BMJ Publishing Group Ltd (“BMJ”) its licensees and where the relevant Journal is co-owned by BMJ to the co-owners of the Journal, to publish the Work in Heart and any other BMJ products and to exploit all rights, as set out in our licence.

The Submitting Author accepts and understands that any supply made under these terms is made by BMJ to the Submitting Author unless you are acting as an employee on behalf of your employer or a postgraduate student of an affiliated institution which is paying any applicable article publishing charge (“APC”) for Open Access articles. Where the Submitting Author wishes to make the Work available on an Open Access basis (and intends to pay the relevant APC), the terms of reuse of such Open Access shall be governed by a Creative Commons licence – details of these licences and which Creative Commons licence will apply to this Work are set out in our licence referred to above.

## References

1. Virani SS, Alonso A, Benjamin EJ, et al. Heart Disease and Stroke Statistics-2020 Update: A Report From the American Heart Association. *Circulation* 2020;141(9):e139-e596.
2. Di Tanna GL, Wirtz H, Burrows KL, Globe G. Evaluating risk prediction models for adults with heart failure: A systematic literature review. *PLoS One* 2020;15(1):e0224135. 10.1371/journal.pone.0224135 [doi].
3. Smith LN, Makam AN, Darden D, et al. Acute Myocardial Infarction Readmission Risk Prediction Models: A Systematic Review of Model Performance. *Circ Cardiovasc Qual Outcomes* 2018;11(1):e003885. 10.1161/CIRCOUTCOMES.117.003885 [doi].
4. Mahajan SM, Heidenreich P, Abbott B, Newton A, Ward D. Predictive models for identifying risk of readmission after index hospitalization for heart failure: A systematic review. *Eur J Cardiovasc Nurs* 2018;17(8):675-689.
5. O'Connor M, Murtaugh CM, Shah S, et al. Patient Characteristics Predicting Readmission Among Individuals Hospitalized for Heart Failure. *Med Care Res Rev* 2016;73(1):3-40.
6. Rahimi K, Bennett D, Conrad N, et al. Risk prediction in patients with heart failure: a systematic review and analysis. *JACC Heart Fail* 2014;2(5):440-446.
7. Betihavas V, Davidson PM, Newton PJ, Frost SA, Macdonald PS, Stewart S. What are the factors in risk prediction models for rehospitalisation for adults with chronic heart failure? *Aust Crit Care* 2012;25(1):31-40.
8. Desai MM, Stauffer BD, Feringa HH, Schreiner GC. Statistical models and patient predictors of readmission for acute myocardial infarction: a systematic review. *Circ Cardiovasc Qual Outcomes* 2009;2(5):500-507.

- 1  
2  
3 9. Ross JS, Mulvey GK, Stauffer B, et al. Statistical models and patient predictors of  
4  
5 readmission for heart failure: a systematic review. *Arch Intern Med* 2008;168(13):1371-1386.  
6  
7
- 8  
9 10. Mahmoudi E, Kamdar N, Kim N, Gonzales G, Singh K, Waljee AK. Use of electronic  
10  
11 medical records in development and validation of risk prediction models of hospital  
12  
13 readmission: systematic review. *BMJ* 2020;369:m958. 10.1136/bmj.m958 [doi].  
14  
15
- 16  
17 11. Zhou H, Della PR, Roberts P, Goh L, Dhaliwal SS. Utility of models to predict 28-day or  
18  
19 30-day unplanned hospital readmissions: an updated systematic review. *BMJ Open*  
20  
21 2016;6(6):e011060-2016-011060. 10.1136/bmjopen-2016-011060 [doi].  
22  
23
- 24  
25 12. Song F, Sheldon TA, Sutton AJ, Abrams KR, Jones DR. Methods for exploring  
26  
27 heterogeneity in meta-analysis. *Eval Health Prof* 2001;24(2):126-151.  
28  
29
- 30  
31 13. Moher D, Liberati A, Tetzlaff J, Altman DG, PRISMA Group. Preferred reporting items  
32  
33 for systematic reviews and meta-analyses: the PRISMA statement. *PLoS Med*.  
34  
35 2009;6(7):e1000097. 10.1371/journal.pmed.1000097 [doi].  
36  
37
- 38  
39 14. Distiller. Distiller Systematic Review Software . Available at:  
40  
41 <https://www.evidencepartners.com/products/distillersr-systematic-review-software/>.  
42  
43 Accessed 08/25, 2020.  
44  
45
- 46  
47 15. Wolff RF, Moons KGM, Riley RD, et al. PROBAST: A Tool to Assess the Risk of Bias  
48  
49 and Applicability of Prediction Model Studies. *Ann Intern Med* 2019;170(1):51-58.  
50  
51
- 52  
53 16. Newcombe RG. Confidence intervals for an effect size measure based on the Mann-  
54  
55 Whitney statistic. Part 2: asymptotic methods and evaluation. *Stat Med* 2006;25(4):559-573.  
56  
57  
58  
59  
60



- 1  
2  
3 17. Moretti C, D'Ascenzo F, Omedè P, et al. Thirty-day readmission rates after PCI in a  
4 metropolitan center in Europe: incidence and impact on prognosis. *J Cardiovasc Med*  
5  
6 (Hagerstown) 2015;16(3):238-245.  
7  
8  
9  
10  
11 18. Asche CV, Ren J, Kirkness CS, Kim M, Dong Y, Hippler S. A prediction model to  
12 identify acute myocardial infarction (AMI) patients at risk for 30-day readmission. *SCSC:*  
13  
14 *Proceedings of the Summer Computer Simulation Conference 2016*;1:1-8.  
15  
16 <https://dl.acm.org/doi/10.5555/3015574.3015575>.  
17  
18  
19  
20  
21 19. Cediel G, Sandoval Y, Sexter A, et al. Risk Estimation in Type 2 Myocardial Infarction  
22 and Myocardial Injury: The TARRACO Risk Score. *Am J Med* 2019;132(2):217-226.  
23  
24  
25  
26  
27 20. Chotechuan Y, Phrommintikul A, Muenpa R, et al. The prognostic utility of GRACE  
28 risk score in predictive cardiovascular event rate in STEMI patients with successful  
29 fibrinolysis and delay intervention in non PCI-capable hospital: a retrospective cohort study.  
30  
31 *BMC Cardiovasc.Disord.* 2016;16(1):212. 10.1186/s12872-016-0383-3 [doi].  
32  
33  
34  
35  
36  
37 21. Hilbert JP, Zasadil S, Keyser DJ, Peele PB. Using decision trees to manage hospital  
38 readmission risk for acute myocardial infarction, heart failure, and pneumonia. *Appl Health*  
39  
40 *Econ Health Policy* 2014;12(6):573-585.  
41  
42  
43  
44  
45 22. Dodson JA, Hajduk AM, Murphy TE, et al. Thirty-Day Readmission Risk Model for  
46 Older Adults Hospitalized With Acute Myocardial Infarction.  
47  
48 *Circ.Cardiovasc.Qual.Outcomes* 2019;12(5):e005320.  
49  
50  
51  
52  
53 10.1161/CIRCUOUTCOMES.118.005320 [doi].  
54  
55  
56  
57  
58  
59  
60

- 1  
2  
3 23. Kini V, Peterson PN, Spertus JA, et al. Clinical Model to Predict 90-Day Risk of  
4  
5 Readmission After Acute Myocardial Infarction. *Circ Cardiovasc Qual Outcomes*  
6  
7 2018;11(10):e004788.  
8  
9  
10  
11 24. Nguyen OK, Makam AN, Clark C, Zhang S, Das SR, Halm EA. Predicting 30-Day  
12  
13 Hospital Readmissions in Acute Myocardial Infarction: The AMI "READMITS" (Renal  
14  
15 Function, Elevated Brain Natriuretic Peptide, Age, Diabetes Mellitus, Nonmale Sex,  
16  
17 Intervention with Timely Percutaneous Coronary Intervention, and Low Systolic Blood  
18  
19 Pressure) Score. *J Am Heart Assoc* 2018;7(8):e008882. doi: 10.1161/JAHA.118.008882.  
20  
21  
22  
23 25. Krumholz HM, Lin Z, Drye EE, et al. An administrative claims measure suitable for  
24  
25 profiling hospital performance based on 30-day all-cause readmission rates among patients  
26  
27 with acute myocardial infarction. *Circ Cardiovasc Qual Outcomes* 2011;4(2):243-252.  
28  
29  
30  
31 26. Rana S, Tran T, Luo W, Phung D, Kennedy RL, Venkatesh S. Predicting unplanned  
32  
33 readmission after myocardial infarction from routinely collected administrative hospital data.  
34  
35 *Aust Health Rev* 2014;38(4):377-382.  
36  
37  
38  
39 27. Atzema CL, Dorian P, Fang J, et al. A clinical decision instrument to predict 30-day death  
40  
41 and cardiovascular hospitalizations after an emergency department visit for atrial fibrillation:  
42  
43 The Atrial Fibrillation in the Emergency Room, Part 2 (AFTER2) study. *Am Heart J*  
44  
45 2018;203:85-92.  
46  
47  
48  
49 28. Lahewala S, Arora S, Patel P, et al. Atrial fibrillation: Utility of CHADS(2) and  
50  
51 CHA(2)DS(2)-VASc scores as predictors of readmission, mortality and resource utilization.  
52  
53 *Int J Cardiol* 2017;245:162-167.  
54  
55  
56  
57  
58  
59  
60

- 1  
2  
3 29. Benuzillo J, Caine W, Evans RS, Roberts C, Lappe D, Doty J. Predicting readmission risk  
4 shortly after admission for CABG surgery. *J Card Surg* 2018;33(4):163-170.  
5  
6  
7  
8  
9 30. Deo SV, Raza S, Altarabsheh SE, et al. Risk Calculator to Predict 30-Day Readmission  
10 After Coronary Artery Bypass: A Strategic Decision Support Tool. *Heart Lung Circ*  
11 2019;28(12):1896-1903.  
12  
13  
14  
15  
16  
17 31. Engoren M, Habib RH, Dooner JJ, Schwann TA. Use of genetic programming, logistic  
18 regression, and artificial neural nets to predict readmission after coronary artery bypass  
19 surgery. *J Clin Monit Comput* 2013;27(4):455-464.  
20  
21  
22  
23  
24  
25 32. Lancey R, Kurlansky P, Argenziano M, et al. Uniform standards do not apply to  
26 readmission following coronary artery bypass surgery: a multi-institutional study. *J Thorac*  
27 *Cardiovasc Surg* 2015;149(3):850-7.e1; discussion 857.  
28  
29  
30  
31  
32  
33 33. Rosenblum JM, Lovasik BP, Hunting JC, et al. Predicted Risk of Mortality Score predicts  
34 30-day readmission after coronary artery bypass grafting. *Gen Thorac Cardiovasc Surg*  
35 2019;67(8):661-668.  
36  
37  
38  
39  
40  
41 34. Zitser-Gurevich Y, Simchen E, Galai N, Braun D. Prediction of readmissions after CABG  
42 using detailed follow-up data: the Israeli CABG Study (ISCAB). *Med Care* 1999;37(7):625-  
43 636.  
44  
45  
46  
47  
48  
49 35. Zywtot A, Lau CSM, Glass N, et al. Preoperative Scale to Determine All-Cause  
50 Readmission After Coronary Artery Bypass Operations. *Ann Thorac Surg* 2018;105(4):1086-  
51 1093.  
52  
53  
54  
55  
56  
57 36. Ahmad FS, French B, Bowles KH, et al. Incorporating patient-centered factors into heart  
58 failure readmission risk prediction: A mixed-methods study. *Am Heart J* 2018;200:75-82.  
59  
60

- 1  
2  
3 37. Amarasingham R, Moore BJ, Tabak YP, et al. An automated model to identify heart  
4 failure patients at risk for 30-day readmission or death using electronic medical record data.  
5  
6 Med Care 2010;48(11):981-988.  
7  
8  
9  
10  
11 38. Au AG, McAlister FA, Bakal JA, Ezekowitz J, Kaul P, van Walraven C. Predicting the  
12 risk of unplanned readmission or death within 30 days of discharge after a heart failure  
13 hospitalization. Am Heart J 2012;164(3):365-372.  
14  
15  
16  
17  
18  
19 39. Bardhan I, Oh J, Zhiqiang Z, Kirksey K. Predictive Analytics for Readmission of Patients  
20 with Congestive Heart Failure. Information Systems Research 2015;26(1):19-39.  
21  
22  
23  
24  
25 40. Betihavas V, Frost SA, Newton PJ, et al. An Absolute Risk Prediction Model to  
26 Determine Unplanned Cardiovascular Readmissions for Adults with Chronic Heart Failure.  
27 Heart Lung Circ 2015;24(11):1068-1073.  
28  
29  
30  
31  
32  
33 41. Cox ZL, Lai P, Lewis CM, Lindenfeld J, Collins SP, Lenihan DJ. Customizing national  
34 models for a medical center's population to rapidly identify patients at high risk of 30-day all-  
35 cause hospital readmission following a heart failure hospitalization. Heart Lung  
36  
37 2018;47(4):290-296.  
38  
39  
40  
41  
42  
43 42. Delgado JF, Ferrero Gregori A, Fernández LM, et al. Patient-Associated Predictors of 15-  
44 and 30-Day Readmission After Hospitalization for Acute Heart Failure. Curr Heart Fail Rep  
45  
46 2019;16(6):304-314.  
47  
48  
49  
50  
51 43. Formiga F, Masip J, Chivite D, Corbella X. Applicability of the heart failure Readmission  
52 Risk score: A first European study. Int J Cardiol 2017;236:304-309.  
53  
54  
55  
56  
57  
58  
59  
60

- 1  
2  
3 44. Frizzell JD, Liang L, Schulte PJ, et al. Prediction of 30-Day All-Cause Readmissions in  
4  
5 Patients Hospitalized for Heart Failure: Comparison of Machine Learning and Other  
6  
7 Statistical Approaches. *JAMA Cardiol* 2017;2(2):204-209.  
8  
9  
10  
11 45. Hammill BG, Curtis LH, Fonarow GC, et al. Incremental value of clinical data beyond  
12  
13 claims data in predicting 30-day outcomes after heart failure hospitalization. *Circ Cardiovasc*  
14  
15 *Qual Outcomes* 2011;4(1):60-67.  
16  
17  
18  
19 46. Hummel SL, Katrapati P, Gillespie BW, Defranco AC, Koelling TM. Impact of prior  
20  
21 admissions on 30-day readmissions in medicare heart failure inpatients. *Mayo Clin Proc*  
22  
23 2014;89(5):623-630.  
24  
25  
26  
27 47. Huynh Q, Negishi K, De Pasquale CG, et al. Validation of Predictive Score of 30-Day  
28  
29 Hospital Readmission or Death in Patients With Heart Failure. *Am J Cardiol*  
30  
31 2018;121(3):322-329.  
32  
33  
34  
35 48. Ibrahim AM, Koester C, Al-Akchar M, et al. HOSPITAL Score, LACE Index and  
36  
37 LACE+ Index as predictors of 30-day readmission in patients with heart failure. *BMJ Evid*  
38  
39 *Based Med* 2019.  
40  
41  
42  
43 49. Keenan PS, Normand SL, Lin Z, et al. An administrative claims measure suitable for  
44  
45 profiling hospital performance on the basis of 30-day all-cause readmission rates among  
46  
47 patients with heart failure. *Circ Cardiovasc Qual Outcomes* 2008;1(1):29-37.  
48  
49  
50  
51 50. Kitamura M, Izawa KP, Taniue H, et al. Relationship between Activities of Daily Living  
52  
53 and Readmission within 90 Days in Hospitalized Elderly Patients with Heart Failure. *Biomed*  
54  
55 *Res Int* 2017;2017:7420738.  
56  
57  
58  
59  
60

- 1  
2  
3 51. Leong KT, Wong LY, Aung KC, et al. Risk Stratification Model for 30-Day Heart Failure  
4 Readmission in a Multiethnic South East Asian Community. *Am J Cardiol*  
5  
6 2017;119(9):1428-1432.  
7  
8  
9  
10  
11 52. Li L, Baek J, Jesdale BM, et al. Predicting 30-day mortality and 30-day re-hospitalization  
12 risks in Medicare patients with heart failure discharged to skilled nursing facilities:  
13 development and validation of models using administrative data. *The Journal of Nursing*  
14  
15  
16  
17  
18  
19  
20  
21  
22 53. Lim NK, Lee SE, Lee HY, et al. Risk prediction for 30-day heart failure-specific  
23 readmission or death after discharge: Data from the Korean Acute Heart Failure (KorAHF)  
24 registry. *J Cardiol* 2019;73(2):108-113.  
25  
26  
27  
28  
29  
30 54. Reed J, Bokovoy J, Doram K. Unplanned readmissions after hospital discharge among  
31 heart failure patients at risk for 30-day readmission using an administrative dataset and “off  
32 the shelf” readmission models. *Internet J Cardiovasc Res* 2014;9(1):2020-07-15.  
33  
34  
35  
36  
37  
38 55. Salah K, Kok WE, Eurlings LW, et al. A novel discharge risk model for patients  
39 hospitalised for acute decompensated heart failure incorporating N-terminal pro-B-type  
40 natriuretic peptide levels: a European coLlaboration on Acute decompensated Heart Failure:  
41 ELAN-HF Score. *Heart* 2014;100(2):115-125.  
42  
43  
44  
45  
46  
47  
48 56. Sudhakar S, Zhang W, Kuo YF, Alghrouz M, Barbajelata A, Sharma G. Validation of the  
49 Readmission Risk Score in Heart Failure Patients at a Tertiary Hospital. *J Card Fail*  
50  
51  
52  
53  
54  
55  
56  
57  
58  
59  
60

- 1  
2  
3 57. Tan BY, Gu JY, Wei HY, Chen L, Yan SL, Deng N. Electronic medical record-based  
4 model to predict the risk of 90-day readmission for patients with heart failure. *BMC Med*  
5  
6 *Inform Decis Mak* 2019;19(1):193-019-0915-8.  
7  
8  
9  
10  
11 58. Wang LE, Shaw PA, Mathelier HM, Kimmel SE, French B. Evaluating Risk-Prediction  
12 Models using Data from Electronic Health Records. *Ann Appl Stat* 2016;10(1):286-304.  
13  
14  
15  
16  
17 59. Wang H, Robinson RD, Johnson C, et al. Using the LACE index to predict hospital  
18 readmissions in congestive heart failure patients. *BMC Cardiovasc Disord* 2014;14:97-2261-  
19 14-97.  
20  
21  
22  
23  
24  
25 60. Yazdan-Ashoori P, Lee SF, Ibrahim Q, Van Spall HG. Utility of the LACE index at the  
26 bedside in predicting 30-day readmission or death in patients hospitalized with heart failure.  
27 *Am Heart J* 2016;179:51-58.  
28  
29  
30  
31  
32  
33 61. Disdier Moulder MP, Larock JM, Garofoli A, Foley DA. Family Help With Medication  
34 Management: A Predictive Marker for Early Readmission. *Mayo Clin Proc Innov Qual*  
35 *Outcomes* 2017;1(3):211-218.  
36  
37  
38  
39  
40  
41 62. Raposeiras-Roubín S, Abu-Assi E, Cambeiro-González C, et al. Mortality and  
42 cardiovascular morbidity within 30 days of discharge following acute coronary syndrome in a  
43 contemporary European cohort of patients: How can early risk prediction be improved? The  
44 six-month GRACE risk score. *Rev Port Cardiol* 2015;34(6):383-391.  
45  
46  
47  
48  
49  
50  
51 63. Burke RE, Schnipper JL, Williams MV, et al. The HOSPITAL Score Predicts Potentially  
52 Preventable 30-Day Readmissions in Conditions Targeted by the Hospital Readmissions  
53 Reduction Program. *Med Care* 2017;55(3):285-290.  
54  
55  
56  
57  
58  
59  
60

1  
2  
3 64. Minges KE, Herrin J, Fiorilli PN, Curtis JP. Development and validation of a simple risk  
4 score to predict 30-day readmission after percutaneous coronary intervention in a cohort of  
5 medicare patients. *Catheter Cardiovasc Interv* 2017;89(6):955-963.  
6  
7

8  
9  
10  
11 65. Pack QR, Priya A, Lagu T, et al. Development and Validation of a Predictive Model for  
12 Short- and Medium-Term Hospital Readmission Following Heart Valve Surgery. *J Am Heart*  
13 *Assoc* 2016;5(9):e003544. doi: 10.1161/JAHA.116.003544.  
14  
15

16  
17  
18  
19 66. Oliver-McNeil S, Templin TN, Haines DE. Preoperative ICD risk score variables predict  
20 30-day readmission after implantable cardioverter defibrillator implantation in patients with  
21 heart failure. *Heart Lung* 2016;45(1):29-33.  
22  
23

24  
25  
26  
27 67. Wasfy JH, Rosenfield K, Zelevinsky K, et al. A prediction model to identify patients at  
28 high risk for 30-day readmission after percutaneous coronary intervention. *Circ Cardiovasc*  
29 *Qual Outcomes* 2013;6(4):429-435.  
30  
31

32  
33  
34  
35 68. Barnett SD, Sarin E, Kiser AC, et al. Examination of a Proposed 30-day Readmission  
36 Risk Score on Discharge Location and Cost. *Ann Thorac Surg* 2020;109(6):1797-1803.  
37  
38

39  
40  
41 69. Brown JR, Jacobs JP, Alam SS, et al. Utility of Biomarkers to Improve Prediction of  
42 Readmission or Mortality After Cardiac Surgery. *Ann Thorac Surg* 2018;106(5):1294-1301.  
43  
44

45  
46  
47 70. Espinoza J, Camporrontondo M, Vrancic M, et al. 30-day readmission score after cardiac  
48 surgery. *Clin. Trials Regul. Sci. Cardio* 2016;20:2020-07-15.  
49

50  
51 <https://doi.org/10.1016/j.ctrsc.2016.05.006>.  
52

53  
54  
55 71. Ferraris VA, Ferraris SP, Harmon RC, Evans BD. Risk factors for early hospital  
56 readmission after cardiac operations. *J Thorac Cardiovasc Surg* 2001;122(2):278-286.  
57  
58



- 1  
2  
3 72. Kilic A, Magruder JT, Grimm JC, et al. Development and Validation of a Score to Predict  
4 the Risk of Readmission After Adult Cardiac Operations. *Ann Thorac Surg* 2017;103(1):66-  
5  
6  
7  
8 73.  
9  
10  
11 73. Stuebe J, Rydingsward J, Lander H, et al. A Pragmatic Preoperative Prediction Score for  
12 Nonhome Discharge After Cardiac Operations. *Ann Thorac Surg* 2018;105(5):1384-1391.  
13  
14  
15  
16  
17 74. Tam DY, Fang J, Tran A, et al. A Clinical Risk Scoring Tool to Predict Readmission  
18 After Cardiac Surgery: An Ontario Administrative and Clinical Population Database Study.  
19 *Can J Cardiol* 2018;34(12):1655-1664.  
20  
21  
22  
23  
24  
25 75. Khera S, Kolte D, Deo S, et al. Derivation and external validation of a simple risk tool to  
26 predict 30-day hospital readmissions after transcatheter aortic valve replacement.  
27 *EuroIntervention* 2019;15(2):155-163.  
28  
29  
30  
31  
32  
33 76. Sanchez CE, Hermiller JB, Jr, Pinto DS, et al. Predictors and Risk Calculator of Early  
34 Unplanned Hospital Readmission Following Contemporary Self-Expanding Transcatheter  
35 Aortic Valve Replacement from the STS/ACC TVT Registry. *Cardiovasc Revasc Med*  
36 2020;21(3):263-270.  
37  
38  
39  
40  
41  
42  
43 77. Kerr KF, Pepe MS. Joint modeling, covariate adjustment, and interaction: contrasting  
44 notions in risk prediction models and risk prediction performance. *Epidemiology*  
45 2011;22(6):805-812.  
46  
47  
48  
49  
50  
51 78. Jordan K, Moons K. Electronic healthcare records and prognosis research. In: Riley R,  
52 van der Windt D, Croft P, Moons K, editors. *Prognosis research in healthcare. Concepts,*  
53 *methods and impact* Oxford: Oxford University press; 2019.  
54  
55  
56  
57  
58  
59  
60

1  
2  
3 79. Collins G, Reitsma J, Altman D, Moons K. Transparent reporting of a multivariable  
4 prediction model for individual prognosis or diagnosis (TRIPOD): The TRIPOD statement.  
5  
6 2020; Available at: <https://www.equator-network.org/reporting-guidelines/tripod-statement/>.  
7  
8 Accessed 08/20, 2020.  
9  
10  
11  
12  
13  
14  
15  
16  
17  
18  
19  
20  
21  
22  
23  
24  
25  
26  
27  
28  
29  
30  
31  
32  
33  
34  
35  
36  
37  
38  
39  
40  
41  
42  
43  
44  
45  
46  
47  
48  
49  
50  
51  
52  
53  
54  
55  
56  
57  
58  
59  
60

For peer review only

## Figure legends

### Figure 1. Flowchart

In total, 8592 records were screened and 60 studies with 81 prediction models were included.

### Figure 2. PROBAST Risk of bias and applicability

The PROBAST tool<sup>15</sup> was used to assess the risk of bias for the participants, predictors, outcome and analysis for each model. Only one study demonstrated low risk of bias on all domains.

### Figure 3. Meta-analysis of prediction models

Random-effect models were used to pool similar models reported in independent cohorts. For the HOSPITAL score, the discrimination for the HF and AMI samples were similar (0.65 and 0.64). For GRACE, the discrimination for the AMI and reinfarction samples were similar (0.77 and 0.74), and was higher for the HF sample (0.83). Only GRACE demonstrated adequate discrimination in external cohorts.

### Figure 4. Predictors of unplanned hospital readmission

The plot provides an overview of the random-effects meta-analyses that were performed for predictors who were similarly defined for the outcome unplanned hospital readmission at 30 days follow-up. See Supplemental table 3 and Supplemental figures 9-26 for more details.

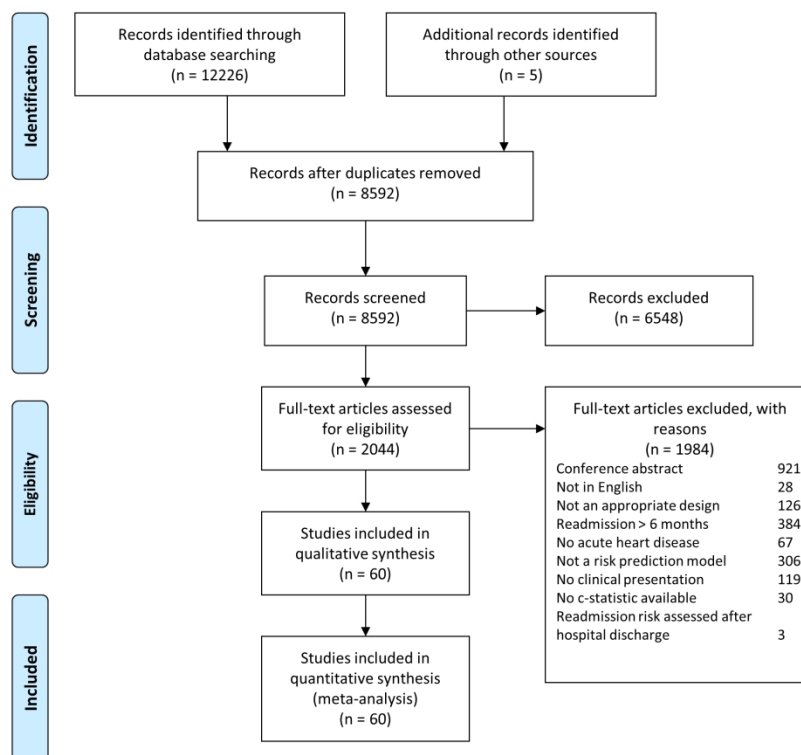

Flowchart  
 In total, 8592 records were screened and 60 studies with 81 prediction models were included.

190x275mm (300 x 300 DPI)

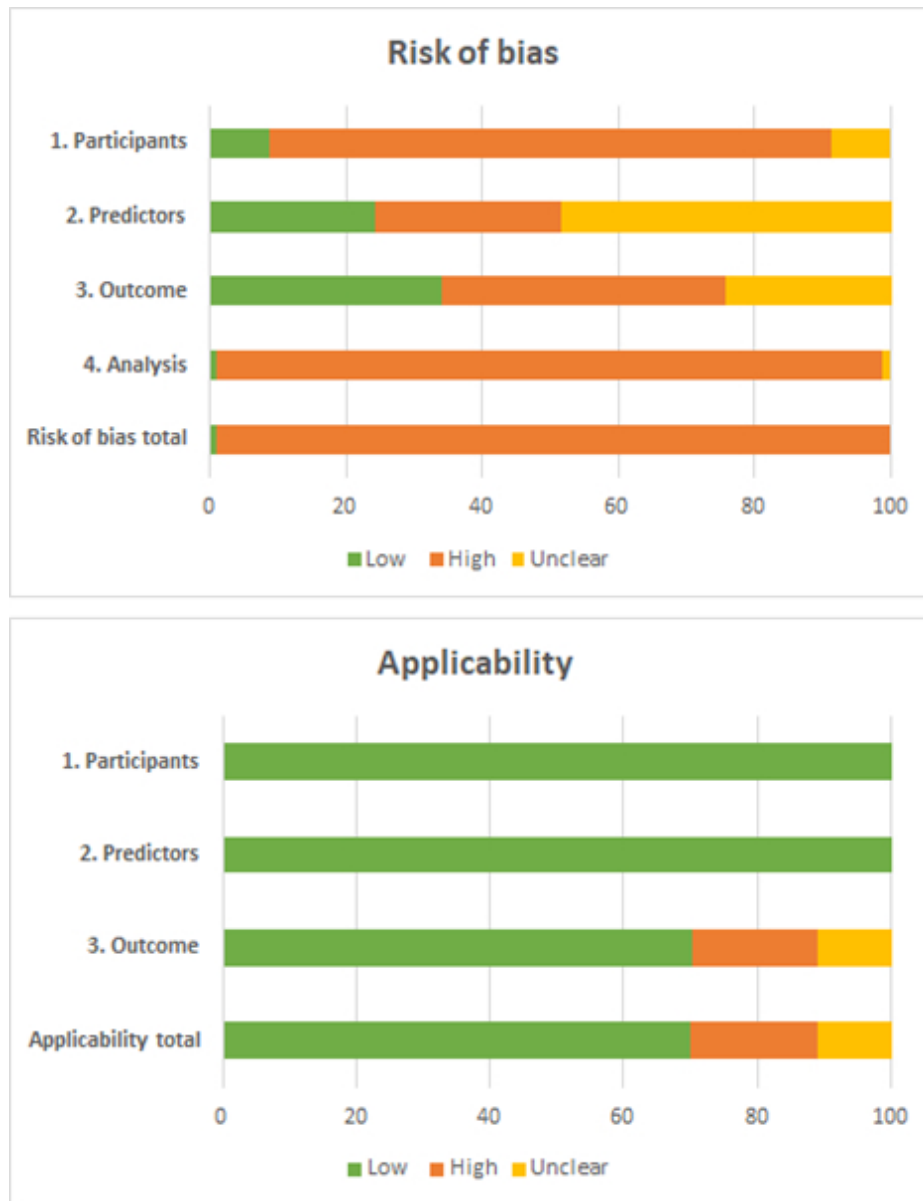

#### PROBAST Risk of bias and applicability

The PROBAST tool<sup>15</sup> was used to assess the risk of bias for the participants, predictors, outcome and analysis for each model. Only one study demonstrated low risk of bias on all domains.

39x51mm (300 x 300 DPI)

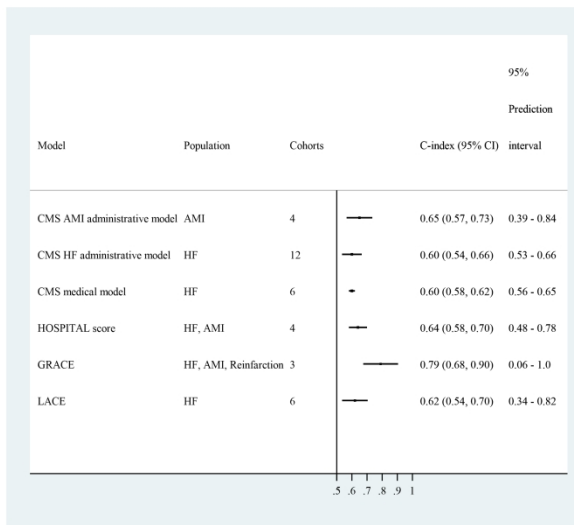

Meta-analysis of prediction models

Random-effect models were used to pool similar models reported in independent cohorts. For the HOSPITAL score, the discrimination for the HF and AMI samples were similar (0.65 and 0.64). For GRACE, the discrimination for the AMI and reinfarction samples were similar (0.77 and 0.74), and was higher for the HF sample (0.83). Only GRACE demonstrated adequate discrimination in external cohorts.

338x190mm (300 x 300 DPI)

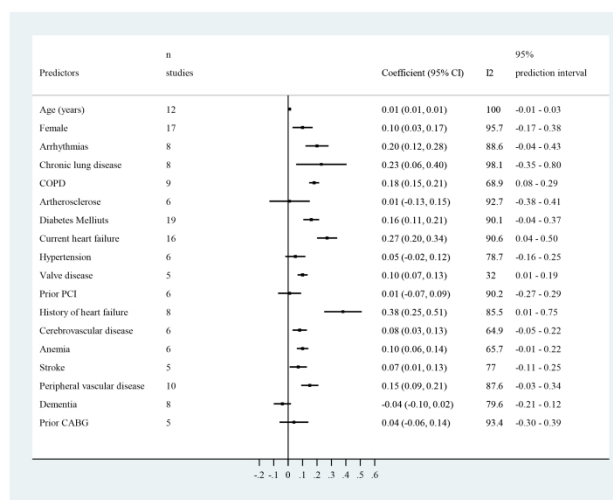

Predictors of unplanned hospital readmissionThe plot provides an overview of the random-effects meta-analyses that were performed for predictors who were similarly defined for the outcome unplanned hospital readmission at 30 days follow-up. See Supplemental table 2A and Supplemental figures 9-26 for more details.

338x190mm (300 x 300 DPI)

## Supplemental materials

Supplemental Text 1. Search string

Supplemental Text 2. Data items

Supplemental Table 1. Risk of bias

Supplemental Figure 1. Meta-analysis of CMS AMI administrative model

Supplemental Figure 2. Meta-analysis of CMS HF administrative model

Supplemental Figure 3. Meta-analysis of CMS medical model

Supplemental Figure 4. Meta-analysis of HOSPITAL score

Supplemental Figure 5. Meta-analysis of GRACE

Supplemental Figure 6. Meta-analysis of LACE

Supplemental Figure 7. Age as moderator

Supplemental Figure 8. Number of predictors as moderator

Supplemental Table 2. Subgroup analyses

Supplemental Table 3. Summary of meta-analyses predictors

Supplemental Figure 9. Age as predictor

Supplemental Figure 10. Female as predictor

Supplemental Figure 11. Arrhythmias as predictor

Supplemental Figure 12. Chronic lung disease as predictor

Supplemental Figure 13. Chronic Obstructive Pulmonary Disease as predictor

Supplemental Figure 14. Artherosclerosis as predictor

Supplemental Figure 15. Diabetes Mellitus as predictor

Supplemental Figure 16. Current heart failure as predictor

Supplemental Figure 17. Hypertension as predictor

Supplemental Figure 18. Valve disease as predictor

Supplemental Figure 19. Prior percutaneous coronary intervention as predictor

Supplemental Figure 20. History of heart failure as predictor

Supplemental Figure 21. Cerebrovascular disease as predictor

Supplemental Figure 22. Anemia as predictor

Supplemental Figure 23. Stroke as predictor

Supplemental Figure 24. Peripheral vascular disease as predictor

Supplemental Figure 25. Dementia as predictor

Supplemental Figure 26. Prior Coronary Artery Bypass Graft as predictor



## Supplemental Text 1. Search string

Ovid MEDLINE(R) ALL 1946 to November 21, 2019

Search date: 25 August 2020

| #  | Searches                                                                                                                                                                                                                                                                                                                                                                                                                                                                                                                                                                                                                                                                                                                                                                                                                                                                                                                                                                                                                                                                                                                                                                                                                                     | Results |
|----|----------------------------------------------------------------------------------------------------------------------------------------------------------------------------------------------------------------------------------------------------------------------------------------------------------------------------------------------------------------------------------------------------------------------------------------------------------------------------------------------------------------------------------------------------------------------------------------------------------------------------------------------------------------------------------------------------------------------------------------------------------------------------------------------------------------------------------------------------------------------------------------------------------------------------------------------------------------------------------------------------------------------------------------------------------------------------------------------------------------------------------------------------------------------------------------------------------------------------------------------|---------|
| 1  | exp "predictive value of tests"/ or roc curve/ or exp Decision Support Techniques/                                                                                                                                                                                                                                                                                                                                                                                                                                                                                                                                                                                                                                                                                                                                                                                                                                                                                                                                                                                                                                                                                                                                                           | 321482  |
| 2  | ("signal to noise" or roc curve or reiver operating or predict*).ab,kf,ti.                                                                                                                                                                                                                                                                                                                                                                                                                                                                                                                                                                                                                                                                                                                                                                                                                                                                                                                                                                                                                                                                                                                                                                   | 1644590 |
| 3  | (decision adj2 (aid? or model* or clinical* or support or system? or tool?)).ab,kf,ti.                                                                                                                                                                                                                                                                                                                                                                                                                                                                                                                                                                                                                                                                                                                                                                                                                                                                                                                                                                                                                                                                                                                                                       | 56262   |
| 4  | decision?.ab,kf,ti.                                                                                                                                                                                                                                                                                                                                                                                                                                                                                                                                                                                                                                                                                                                                                                                                                                                                                                                                                                                                                                                                                                                                                                                                                          | 381353  |
| 5  | logistic models/                                                                                                                                                                                                                                                                                                                                                                                                                                                                                                                                                                                                                                                                                                                                                                                                                                                                                                                                                                                                                                                                                                                                                                                                                             | 139814  |
| 6  | (logistic model* or regression).ab,kf,ti.                                                                                                                                                                                                                                                                                                                                                                                                                                                                                                                                                                                                                                                                                                                                                                                                                                                                                                                                                                                                                                                                                                                                                                                                    | 758909  |
| 7  | 5 or 6                                                                                                                                                                                                                                                                                                                                                                                                                                                                                                                                                                                                                                                                                                                                                                                                                                                                                                                                                                                                                                                                                                                                                                                                                                       | 814876  |
| 8  | 4 and 7                                                                                                                                                                                                                                                                                                                                                                                                                                                                                                                                                                                                                                                                                                                                                                                                                                                                                                                                                                                                                                                                                                                                                                                                                                      | 23040   |
| 9  | or/1-3,8                                                                                                                                                                                                                                                                                                                                                                                                                                                                                                                                                                                                                                                                                                                                                                                                                                                                                                                                                                                                                                                                                                                                                                                                                                     | 1861041 |
| 10 | patient readmission/                                                                                                                                                                                                                                                                                                                                                                                                                                                                                                                                                                                                                                                                                                                                                                                                                                                                                                                                                                                                                                                                                                                                                                                                                         | 17534   |
| 11 | ((readmission or readmitted or re-admission or re-admitted) and (hospital* or prehospital*)).ab,kf,ti.                                                                                                                                                                                                                                                                                                                                                                                                                                                                                                                                                                                                                                                                                                                                                                                                                                                                                                                                                                                                                                                                                                                                       | 20747   |
| 12 | ((readmission or readmitted or re-admission or re-admitted) adj2 (patient? or client)).ab,kf,ti.                                                                                                                                                                                                                                                                                                                                                                                                                                                                                                                                                                                                                                                                                                                                                                                                                                                                                                                                                                                                                                                                                                                                             | 4515    |
| 13 | (rehospitali?ation? or re-hospitali?ation? or rehospitali?ed or re-hospitali?ed).ab,kf,ti.                                                                                                                                                                                                                                                                                                                                                                                                                                                                                                                                                                                                                                                                                                                                                                                                                                                                                                                                                                                                                                                                                                                                                   | 7834    |
| 14 | or/10-13                                                                                                                                                                                                                                                                                                                                                                                                                                                                                                                                                                                                                                                                                                                                                                                                                                                                                                                                                                                                                                                                                                                                                                                                                                     | 35723   |
| 15 | exp cardiovascular system/ or exp cardiovascular diseases/                                                                                                                                                                                                                                                                                                                                                                                                                                                                                                                                                                                                                                                                                                                                                                                                                                                                                                                                                                                                                                                                                                                                                                                   | 3001695 |
| 16 | (cardiac* or cardio* or myocard* or coronary or heart).ab,jw,kf,ti.                                                                                                                                                                                                                                                                                                                                                                                                                                                                                                                                                                                                                                                                                                                                                                                                                                                                                                                                                                                                                                                                                                                                                                          | 2161260 |
| 17 | (diastolic or systolic or edema or dyspnea or renocardiac or Stenocardia* or angor or angina* or atheroscleros* or atheroscleros* or arteroscleros* or Arterioscleros* or Kounis syndrome or ST elevation or STEMI or valve* or aortic or stenosis or Leopard Syndrome or Noonan Syndrome with Multiple Lentigines or Multiple Lentigines Syndrome or Obstructive Subaortic Conus or Absent Right Atrioventricular Connection or arrhythmia* or sinus or sinoatrial or atria* or auricular or atrioventricular or ventricular or bradycardia or Bradyarrhythmia* or tachycardia* or fibrillation* or flutter* or Right Bundle Branch Block or Brugada or extrasystole* or (commotion adj1 cordis) or Auriculo-Ventricular Dissociation or Auriculo Ventricular Dissociation or Atrioventricular Dissociation or A-V Dissociation or AV Dissociation or syncope or (Andersen adj2 Tawil) or QT Syndrome or (jervell adj2 lange) or Prolonged QT Interval or (romano adj1 ward) or parasystole or Pre-Excitation or Preexcitation or (Lown adj2 Ganong) or Short PR-Normal QRS Complex Syndrome or Short PR Normal QRS Complex Syndrome or Wolff-Parkinson-White or WPW Syndrome or Idioventricular Rhythm or Torsade de Pointes).ab,hw,kf,ti. | 1642025 |
| 18 | or/15-17                                                                                                                                                                                                                                                                                                                                                                                                                                                                                                                                                                                                                                                                                                                                                                                                                                                                                                                                                                                                                                                                                                                                                                                                                                     | 4136701 |
| 19 | (predict* adj3 risk?).ab,kf,ti.                                                                                                                                                                                                                                                                                                                                                                                                                                                                                                                                                                                                                                                                                                                                                                                                                                                                                                                                                                                                                                                                                                                                                                                                              | 57669   |
| 20 | retrospective.ab,hw,kf,ti.                                                                                                                                                                                                                                                                                                                                                                                                                                                                                                                                                                                                                                                                                                                                                                                                                                                                                                                                                                                                                                                                                                                                                                                                                   | 1006259 |
| 21 | (admission or hospitali?ation or discharge).ab,hw,kf,ti.                                                                                                                                                                                                                                                                                                                                                                                                                                                                                                                                                                                                                                                                                                                                                                                                                                                                                                                                                                                                                                                                                                                                                                                     | 529444  |
| 22 | and/18-21                                                                                                                                                                                                                                                                                                                                                                                                                                                                                                                                                                                                                                                                                                                                                                                                                                                                                                                                                                                                                                                                                                                                                                                                                                    | 692     |
| 23 | and/9,14,18                                                                                                                                                                                                                                                                                                                                                                                                                                                                                                                                                                                                                                                                                                                                                                                                                                                                                                                                                                                                                                                                                                                                                                                                                                  | 3482    |
| 24 | (ISRCTN96643197 or ChiCTR1900026250 or NCT04008914 or NCT03791541 or NCT03300791 or "CTRI/2016/10/007411" or "CTRI/2014/06/004690" or NCT03949439 or NCT03905226 or NCT00344513 or NCT01755052 or NCT02041585).ab,kf,ti.                                                                                                                                                                                                                                                                                                                                                                                                                                                                                                                                                                                                                                                                                                                                                                                                                                                                                                                                                                                                                     | 9       |
| 25 | ((OPERA or REIC or FigARO or PREDIC or optimize-hf or ten-hms or tele-hf or readmits or silver-ami or dc promis or KorAHF) adj3 (trial or study)).ab,kf,ti.                                                                                                                                                                                                                                                                                                                                                                                                                                                                                                                                                                                                                                                                                                                                                                                                                                                                                                                                                                                                                                                                                  | 118     |
| 26 | or/22-25                                                                                                                                                                                                                                                                                                                                                                                                                                                                                                                                                                                                                                                                                                                                                                                                                                                                                                                                                                                                                                                                                                                                                                                                                                     | 4209    |

## Ovid Embase Classic+Embase &lt;1947 to 2020 August 24&gt;

Search date: 25 August 2020

| #  | Searches                                                                                                                                                                                                                                                                                                                                                                                                                                                                                                                                                                                                                                                                                                                                                                                                                                                                                                                                                                                                                                                                                                                                                                                                                                     | Results |
|----|----------------------------------------------------------------------------------------------------------------------------------------------------------------------------------------------------------------------------------------------------------------------------------------------------------------------------------------------------------------------------------------------------------------------------------------------------------------------------------------------------------------------------------------------------------------------------------------------------------------------------------------------------------------------------------------------------------------------------------------------------------------------------------------------------------------------------------------------------------------------------------------------------------------------------------------------------------------------------------------------------------------------------------------------------------------------------------------------------------------------------------------------------------------------------------------------------------------------------------------------|---------|
| 1  | *predictive value/ or *receiver operating characteristic/ or exp *Decision Support system/                                                                                                                                                                                                                                                                                                                                                                                                                                                                                                                                                                                                                                                                                                                                                                                                                                                                                                                                                                                                                                                                                                                                                   | 21786   |
| 2  | ("signal to noise" or roc curve or reiver operating or predict*).ab,kw,ti.                                                                                                                                                                                                                                                                                                                                                                                                                                                                                                                                                                                                                                                                                                                                                                                                                                                                                                                                                                                                                                                                                                                                                                   | 2224346 |
| 3  | (decision adj2 (aid? or model* or clinical* or support or system? or tool?)).ab,kw,ti.                                                                                                                                                                                                                                                                                                                                                                                                                                                                                                                                                                                                                                                                                                                                                                                                                                                                                                                                                                                                                                                                                                                                                       | 80866   |
| 4  | decision?.ab,kw,ti.                                                                                                                                                                                                                                                                                                                                                                                                                                                                                                                                                                                                                                                                                                                                                                                                                                                                                                                                                                                                                                                                                                                                                                                                                          | 531706  |
| 5  | *logistic regression analysis/                                                                                                                                                                                                                                                                                                                                                                                                                                                                                                                                                                                                                                                                                                                                                                                                                                                                                                                                                                                                                                                                                                                                                                                                               | 1018    |
| 6  | (logistic model* or regression).ab,kw,ti.                                                                                                                                                                                                                                                                                                                                                                                                                                                                                                                                                                                                                                                                                                                                                                                                                                                                                                                                                                                                                                                                                                                                                                                                    | 1107281 |
| 7  | 5 or 6                                                                                                                                                                                                                                                                                                                                                                                                                                                                                                                                                                                                                                                                                                                                                                                                                                                                                                                                                                                                                                                                                                                                                                                                                                       | 1107307 |
| 8  | 4 and 7                                                                                                                                                                                                                                                                                                                                                                                                                                                                                                                                                                                                                                                                                                                                                                                                                                                                                                                                                                                                                                                                                                                                                                                                                                      | 33059   |
| 9  | or/1-3,8                                                                                                                                                                                                                                                                                                                                                                                                                                                                                                                                                                                                                                                                                                                                                                                                                                                                                                                                                                                                                                                                                                                                                                                                                                     | 2305864 |
| 10 | *hospital readmission/                                                                                                                                                                                                                                                                                                                                                                                                                                                                                                                                                                                                                                                                                                                                                                                                                                                                                                                                                                                                                                                                                                                                                                                                                       | 13570   |
| 11 | ((readmission or readmitted or re-admission or re-admitted) and (hospital* or prehospita*)).ab,kw,ti.                                                                                                                                                                                                                                                                                                                                                                                                                                                                                                                                                                                                                                                                                                                                                                                                                                                                                                                                                                                                                                                                                                                                        | 39681   |
| 12 | ((readmission or readmitted or re-admission or re-admitted) adj2 (patient? or client)).ab,kw,ti.                                                                                                                                                                                                                                                                                                                                                                                                                                                                                                                                                                                                                                                                                                                                                                                                                                                                                                                                                                                                                                                                                                                                             | 9596    |
| 13 | (rehospitali?ation? or re-hospitali?ation? or rehospitali?ed or re-hospitali?ed).ab,kw,ti.                                                                                                                                                                                                                                                                                                                                                                                                                                                                                                                                                                                                                                                                                                                                                                                                                                                                                                                                                                                                                                                                                                                                                   | 14392   |
| 14 | or/10-13                                                                                                                                                                                                                                                                                                                                                                                                                                                                                                                                                                                                                                                                                                                                                                                                                                                                                                                                                                                                                                                                                                                                                                                                                                     | 56536   |
| 15 | exp *cardiovascular system/                                                                                                                                                                                                                                                                                                                                                                                                                                                                                                                                                                                                                                                                                                                                                                                                                                                                                                                                                                                                                                                                                                                                                                                                                  | 630584  |
| 16 | (cardiac* or cardio* or myocard* or coronary or heart).ab,jw,kw,ti.                                                                                                                                                                                                                                                                                                                                                                                                                                                                                                                                                                                                                                                                                                                                                                                                                                                                                                                                                                                                                                                                                                                                                                          | 3123455 |
| 17 | (diastolic or systolic or edema or dyspnea or renocardiac or Stenocardia* or angor or angina* or atheroscleros* or atheroscleros* or arteroscleros* or Arterioscleros* or Kounis syndrome or ST elevation or STEMI or valve* or aortic or stenosis or Leopard Syndrome or Noonan Syndrome with Multiple Lentiginos or Multiple Lentiginos Syndrome or Obstructive Subaortic Conus or Absent Right Atrioventricular Connection or arrhythmia* or sinus or sinoatrial or atria* or auricular or atrioventricular or ventricular or bradycardia or Bradyarrhythmia* or tachycardia* or fibrillation* or flutter* or Right Bundle Branch Block or Brugada or extrasystole* or (commotion adj1 cordis) or Auriculo-Ventricular Dissociation or Auriculo Ventricular Dissociation or Atrioventricular Dissociation or A-V Dissociation or AV Dissociation or syncope or (Andersen adj2 Tawil) or QT Syndrome or (jervell adj2 lange) or Prolonged QT Interval or (romano adj1 ward) or parasystole or Pre-Excitation or Preexcitation or (Lown adj2 Ganong) or Short PR-Normal QRS Complex Syndrome or Short PR Normal QRS Complex Syndrome or Wolff-Parkinson-White or WPW Syndrome or Idioventricular Rhythm or Torsade de Pointes).ab,hw,kw,ti. | 2756334 |
| 18 | or/15-17                                                                                                                                                                                                                                                                                                                                                                                                                                                                                                                                                                                                                                                                                                                                                                                                                                                                                                                                                                                                                                                                                                                                                                                                                                     | 4713190 |
| 19 | (predict* adj3 risk?).ab,kw,ti.                                                                                                                                                                                                                                                                                                                                                                                                                                                                                                                                                                                                                                                                                                                                                                                                                                                                                                                                                                                                                                                                                                                                                                                                              | 90323   |
| 20 | retrospective.ab,hw,kw,ti.                                                                                                                                                                                                                                                                                                                                                                                                                                                                                                                                                                                                                                                                                                                                                                                                                                                                                                                                                                                                                                                                                                                                                                                                                   | 1280890 |
| 21 | (admission or hospitali?ation or discharge).ab,hw,kw,ti.                                                                                                                                                                                                                                                                                                                                                                                                                                                                                                                                                                                                                                                                                                                                                                                                                                                                                                                                                                                                                                                                                                                                                                                     | 1117031 |
| 22 | and/18-21                                                                                                                                                                                                                                                                                                                                                                                                                                                                                                                                                                                                                                                                                                                                                                                                                                                                                                                                                                                                                                                                                                                                                                                                                                    | 991     |
| 23 | and/9,14,18                                                                                                                                                                                                                                                                                                                                                                                                                                                                                                                                                                                                                                                                                                                                                                                                                                                                                                                                                                                                                                                                                                                                                                                                                                  | 6851    |
| 24 | (ISRCTN96643197 or ChiCTR1900026250 or NCT04008914 or NCT03791541 or NCT03300791 or "CTRI/2016/10/007411" or "CTRI/2014/06/004690" or NCT03949439 or NCT03905226 or NCT00344513 or NCT01755052 or NCT02041585).ab,cn,kw,ti.                                                                                                                                                                                                                                                                                                                                                                                                                                                                                                                                                                                                                                                                                                                                                                                                                                                                                                                                                                                                                  | 31      |
| 25 | ((OPERA or REIC or FigARO or PREDIC or optimize-hf or ten-hms or tele-hf or readmits or silver-ami or dc promis or KorAHF) adj3 (trial or study)).ab,kw,ti.                                                                                                                                                                                                                                                                                                                                                                                                                                                                                                                                                                                                                                                                                                                                                                                                                                                                                                                                                                                                                                                                                  | 285     |
| 26 | or/22-25                                                                                                                                                                                                                                                                                                                                                                                                                                                                                                                                                                                                                                                                                                                                                                                                                                                                                                                                                                                                                                                                                                                                                                                                                                     | 8017    |

## Supplemental Text 2. Data items

The following data was collected in accordance with the CHARMS checklist (Critical Appraisal and Data Extraction for Systematic Reviews): citation, source of data, country, study design, setting, participant description, sample characteristics, study dates, outcome definition, follow-up, number and type of predictors, definition and method for measurement of predictors, timing of predictor measurement, handling of predictors in the modelling, number of participants and number of outcomes/events, calibration, discrimination, classification, methods used for testing model performance, final multivariable model results (regression coefficients, intercept, baseline survival, model performance), and model presentation.

For peer review only

**Supplemental Table 1. Risk of Bias**

| Study            | Model                                    | Risk of bias |            |         |          | Overall Risk of bias | Applicability |            |         | Overall applicability |
|------------------|------------------------------------------|--------------|------------|---------|----------|----------------------|---------------|------------|---------|-----------------------|
|                  |                                          | Participants | Predictors | Outcome | Analysis |                      | Participants  | Predictors | Outcome |                       |
| Barnett et al.   | Model validation                         | -            | ?          | +       | -        | -                    | +             | +          | +       | +                     |
|                  | Model update                             | -            | ?          | +       | -        | -                    | +             | +          | +       | +                     |
| Sanchez et al.   | NR                                       | -            | ?          | ?       | -        | -                    | +             | +          | +       | +                     |
| Deo et al.       | 30-days CABG Readmission Calculator      | -            | -          | -       | -        | -                    | +             | +          | ?       | ?                     |
| Tan et al.       | NR                                       | -            | -          | -       | -        | -                    | +             | +          | -       | -                     |
| Wang et al.      | NR                                       | -            | ?          | ?       | -        | -                    | +             | +          | +       | +                     |
| Rosenblum et al. | The STS PROM score                       | -            | ?          | -       | -        | -                    | +             | +          | +       | +                     |
| Dodson et al.    | SILVER-AMI 30-day readmission calculator | +            | +          | +       | +        | +                    | +             | +          | +       | +                     |
| Lim et al.       | NR                                       | +            | ?          | -       | -        | -                    | +             | +          | -       | -                     |
| Kini et al.      | NR                                       | -            | -          | -       | ?        | -                    | +             | +          | +       | +                     |
| Nguyen et al.    | AMI READMITS score                       | -            | -          | +       | -        | -                    | +             | +          | +       | +                     |
|                  | Full-stay AMI model                      | -            | -          | +       | -        | -                    | +             | +          | +       | +                     |
|                  | CMS AMI administrative model             | -            | ?          | +       | -        | -                    | +             | +          | +       | +                     |
| Cediel et al.    | TARRACO Risk Score                       | -            | -          | -       | -        | -                    | +             | +          | -       | -                     |
| Brown et al.     | STS 30-day Readmission Model             | +            | ?          | ?       | -        | -                    | +             | +          | ?       | ?                     |
|                  | STS Augmented Clinical Model             | -            | ?          | +       | -        | -                    | +             | +          | ?       | ?                     |
| Khera et al.     | TAVR 30-Day Readmission Risk Model       | -            | -          | ?       | -        | -                    | +             | +          | ?       | ?                     |
| Tam et al.       | NR                                       | -            | -          | ?       | -        | -                    | +             | +          | ?       | ?                     |
| Atzema et al.    | AFTER Part 2 scoring system              | -            | -          | -       | -        | -                    | +             | +          | -       | -                     |
| Stuebe et al.    | NR                                       | -            | +          | -       | -        | -                    | +             | +          | +       | +                     |
| Huynh et al.     | NR                                       | -            | -          | ?       | -        | -                    | +             | +          | +       | +                     |
| Zywot et al.     | CABG Risk Scale                          | -            | ?          | ?       | -        | -                    | +             | +          | +       | +                     |

1  
2  
3  
4  
5  
6  
7  
8  
9  
10  
11  
12  
13  
14  
15  
16  
17  
18  
19  
20  
21  
22  
23  
24  
25  
26  
27  
28  
29  
30  
31  
32  
33  
34  
35  
36  
37  
38  
39  
40  
41  
42  
43  
44  
45  
46

**Supplemental Table 1. Risk of bias (continued)**

| Study                    | Model                            | Risk of bias |            |         |          | Overall Risk of bias | Applicability |            |         | Overall applicability |
|--------------------------|----------------------------------|--------------|------------|---------|----------|----------------------|---------------|------------|---------|-----------------------|
|                          |                                  | Participants | Predictors | Outcome | Analysis |                      | Participants  | Predictors | Outcome |                       |
| Cox et al.               | CMS HF medical model             | -            | +          | +       | -        | -                    | +             | +          | +       | +                     |
|                          | CMS HF administrative model      | -            | ?          | +       | -        | -                    | +             | +          | +       | +                     |
| Zitser-Gurevich et al.   | NR                               | ?            | +          | +       | -        | -                    | +             | +          | +       | +                     |
| Ahmad et al.             | CMS HF administrative model      | -            | +          | +       | -        | -                    | +             | +          | +       | +                     |
| Minges et al.            | NR                               | -            | +          | +       | -        | -                    | +             | +          | +       | +                     |
| Pack et al.              | NR                               | -            | -          | -       | -        | -                    | +             | +          | +       | +                     |
| Benuzillo et al.         | CRSS                             | -            | -          | +       | -        | -                    | +             | +          | +       | +                     |
| Kitamura et al.          | FIM                              | -            | ?          | -       | -        | -                    | +             | +          | +       | +                     |
| Lahewala et al.          | CHADS2                           | -            | ?          | +       | -        | -                    | +             | +          | +       | +                     |
|                          | CHA2DS-VASc                      | -            | ?          | +       | -        | -                    | +             | +          | +       | +                     |
| Formiga et al.           | CMS HF medical model             | -            | ?          | -       | -        | -                    | +             | +          | +       | +                     |
| Leong et al.             | 30-day HF readmission risk score | -            | +          | -       | -        | -                    | +             | +          | -       | -                     |
| Burke et al.             | HOSPITAL score                   | -            | -          | -       | -        | -                    | +             | +          | +       | +                     |
| Kilic et al.             | NR                               | -            | ?          | -       | -        | -                    | +             | +          | +       | +                     |
| Moulder et al.           | NR                               | +            | +          | -       | -        | -                    | +             | +          | +       | +                     |
| Chotechuang et al.       | GRACE                            | -            | -          | -       | -        | -                    | +             | +          | -       | -                     |
| Yazdan-Ashoori et al.    | LACE                             | ?            | ?          | +       | -        | -                    | +             | +          | +       | +                     |
|                          | CMS HF administrative model      | ?            | ?          | +       | -        | -                    | +             | +          | +       | +                     |
| Oliver-McNeil et al.     | ICD Readmission-Risk Score       | -            | ?          | -       | -        | -                    | +             | +          | +       | +                     |
| Sudhakar et al.          | CMS HF medical model             | -            | +          | -       | -        | -                    | +             | +          | +       | +                     |
| Raposeiras-Roubín et al. | GRACE                            | -            | -          | -       | -        | -                    | +             | +          | -       | -                     |
| Betihavas et al.         | NR                               | -            | ?          | -       | -        | -                    | +             | +          | -       | -                     |
| Lancey et al.            | NR                               | -            | ?          | -       | -        | -                    | +             | +          | +       | +                     |
| Moretti et al.           | EuroHeart PCI score              | -            | +          | -       | -        | -                    | +             | +          | -       | -                     |
| Hilbert et al.           | HF decision tree                 | -            | +          | +       | -        | -                    | +             | +          | +       | +                     |
|                          | AMI decision tree                | -            | +          | +       | -        | -                    | +             | +          | +       | +                     |

**Supplemental Table 1. Risk of bias (continued)**

| Study               | Model                                               | Risk of bias |            |         |          | Overall Risk of bias | Applicability |            |         | Overall applicability |
|---------------------|-----------------------------------------------------|--------------|------------|---------|----------|----------------------|---------------|------------|---------|-----------------------|
|                     |                                                     | Participants | Predictors | Outcome | Analysis |                      | Participants  | Predictors | Outcome |                       |
| Wang et al.         | LACE                                                | -            | ?          | -       | -        | -                    | +             | +          | +       | +                     |
| Rana et al.         | HOSPITAL score                                      | -            | ?          | -       | -        | -                    | +             | +          | -       | -                     |
|                     | Elixhauser index                                    | -            | ?          | -       | -        | -                    | +             | +          | -       | -                     |
| Hummel et al.       | CMS HF medical model                                | ?            | +          | +       | -        | -                    | +             | +          | +       | +                     |
| Salah et al.        | ELAN-HF score                                       | -            | ?          | -       | -        | -                    | +             | +          | -       | -                     |
| Wasfy et al.        | Pre-PCI model                                       | -            | +          | ?       | -        | -                    | +             | +          | +       | +                     |
| Engoren et al.      | NR                                                  | -            | ?          | +       | -        | -                    | +             | +          | +       | +                     |
| Au et al.           | Administrative Claims Model:<br>HF 30-day mortality | -            | ?          | ?       | -        | -                    | +             | +          | ?       | ?                     |
|                     | Charlson Comorbidity Score                          | -            | ?          | ?       | -        | -                    | +             | +          | ?       | ?                     |
|                     | CMS HF administrative model                         | -            | ?          | ?       | -        | -                    | +             | +          | ?       | ?                     |
|                     | LACE                                                | -            | ?          | ?       | -        | -                    | +             | +          | ?       | ?                     |
| Krumholz et al.     | CMS AMI medical model                               | +            | -          | +       | -        | -                    | +             | +          | +       | +                     |
|                     | CMS AMI administrative model                        | -            | -          | +       | -        | -                    | +             | +          | +       | +                     |
| Amarasingham et al. | Tabak mortality score                               | -            | ?          | ?       | -        | -                    | +             | +          | +       | +                     |
|                     | CMS HF administrative model                         | -            | ?          | ?       | -        | -                    | +             | +          | +       | +                     |
|                     | ADHERE                                              | -            | ?          | ?       | -        | -                    | +             | +          | +       | +                     |
| Keenan et al.       | CMS HF administrative model                         | -            | -          | +       | -        | -                    | +             | +          | +       | +                     |
|                     | CMS HF medical model                                | +            | -          | -       | -        | -                    | +             | +          | +       | +                     |
| Ferraris et al.     | READMIT                                             | ?            | +          | +       | -        | -                    | +             | +          | +       | +                     |
| Delgado et al.      | 15-day CV readmission risk score                    | ?            | +          | -       | -        | -                    | +             | +          | -       | -                     |
|                     | 30-day CV readmission risk score                    | ?            | +          | -       | -        | -                    | +             | +          | -       | -                     |
| Espinoza et al.     | 30-day readmission score after cardiac surgery      | +            | ?          | ?       | -        | -                    | +             | +          | +       | +                     |

1  
2  
3  
4  
5  
6  
7  
8  
9  
10  
11  
12  
13  
14  
15  
16  
17  
18  
19  
20  
21  
22  
23  
24  
25  
26  
27  
28  
29  
30  
31  
32  
33  
34  
35  
36  
37  
38  
39  
40  
41  
42  
43  
44  
45  
46

**Supplemental Table 1. Risk of bias (continued)**

| Study           | Model                       | Risk of bias |            |         |          | Overall Risk of bias | Applicability |            |         | Overall applicability |
|-----------------|-----------------------------|--------------|------------|---------|----------|----------------------|---------------|------------|---------|-----------------------|
|                 |                             | Participants | Predictors | Outcome | Analysis |                      | Participants  | Predictors | Outcome |                       |
| Reed et al.     | CMS HF administrative model | -            | ?          | ?       | -        | -                    | +             | +          | +       | +                     |
|                 | PARR-30                     | -            | ?          | ?       | -        | -                    | +             | +          | +       | +                     |
|                 | LACE                        | -            | ?          | ?       | -        | -                    | +             | +          | +       | +                     |
|                 | Hasan                       | -            | ?          | ?       | -        | -                    | +             | +          | +       | +                     |
|                 | AH model                    | -            | ?          | ?       | -        | -                    | +             | +          | +       | +                     |
| Ibrahim et al.  | HOSPITAL score              | -            | +          | -       | -        | -                    | +             | +          | +       | +                     |
|                 | LACE                        | -            | +          | -       | -        | -                    | +             | +          | +       | +                     |
|                 | LACE+ index                 | -            | +          | -       | -        | -                    | +             | +          | +       | +                     |
| Bardhan et al.  | NR                          | -            | -          | -       | -        | -                    | +             | +          | -       | -                     |
| Asche et al.    | NR                          | -            | ?          | -       | -        | -                    | +             | +          | ?       | ?                     |
| Li et al.       | NR                          | -            | ?          | +       | -        | -                    | +             | +          | +       | +                     |
| Hamill et al.   | CMS HF administrative model | -            | -          | +       | ?        | -                    | +             | +          | +       | +                     |
| Frizzell et al. | CMS HF administrative model | -            | -          | +       | -        | -                    | +             | +          | +       | +                     |

Legend: the overall risk of bias assessment is located in the main paper.

Abbreviations: AH: Adventist hospitals, CABG: coronary artery bypass grafting, CMS=centers for Medicare and Medicaid services, CRSS: CABG Readmission Risk Score, Fim: motor and cognitive Functional Independence Measure, HF: heart failure, ICD: implantable cardioverter defibrillator, NR: not reported, PARR-30: Patients at Risk of Re-admission within 30-days, PCI: percutaneous coronary intervention, TAVR: transcatheter aortic valve replacement

**Supplemental Figure 1. Meta-analysis of CMS AMI administrative model**

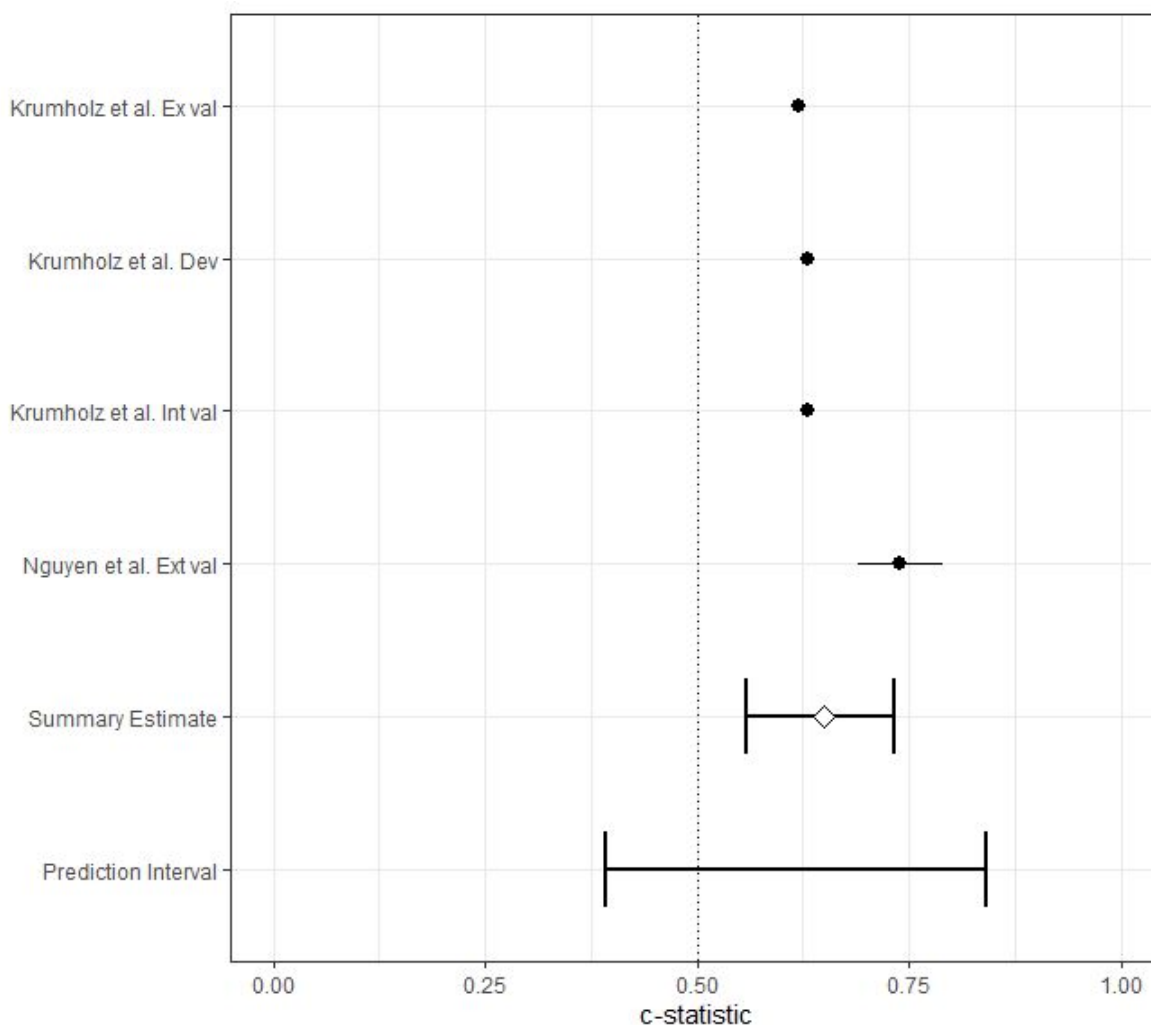

Legend: The CMS acute myocardial infarction (AMI) administrative model was evaluated in four independent cohorts in two studies: 0.65, 95% CI 0.56 to 0.73, 95% prediction interval 0.39 to 0.84. Standard errors were derived from the reported c-statistics, sample size and observed events. The readmission rate was missing for the internal validation cohort in the Krumholz et al. study, and this data was needed to derive the observed events. The development and validation cohort in the Krumholz et al. study were similar samples and we used the average readmission rate from these two cohorts to impute the missing readmission rate for the internal validation.

Abbreviations: Ext val: external validation, Int val: internal validation, Dev: Development



### Supplemental Figure 2. Meta-analysis of CMS HF administrative model

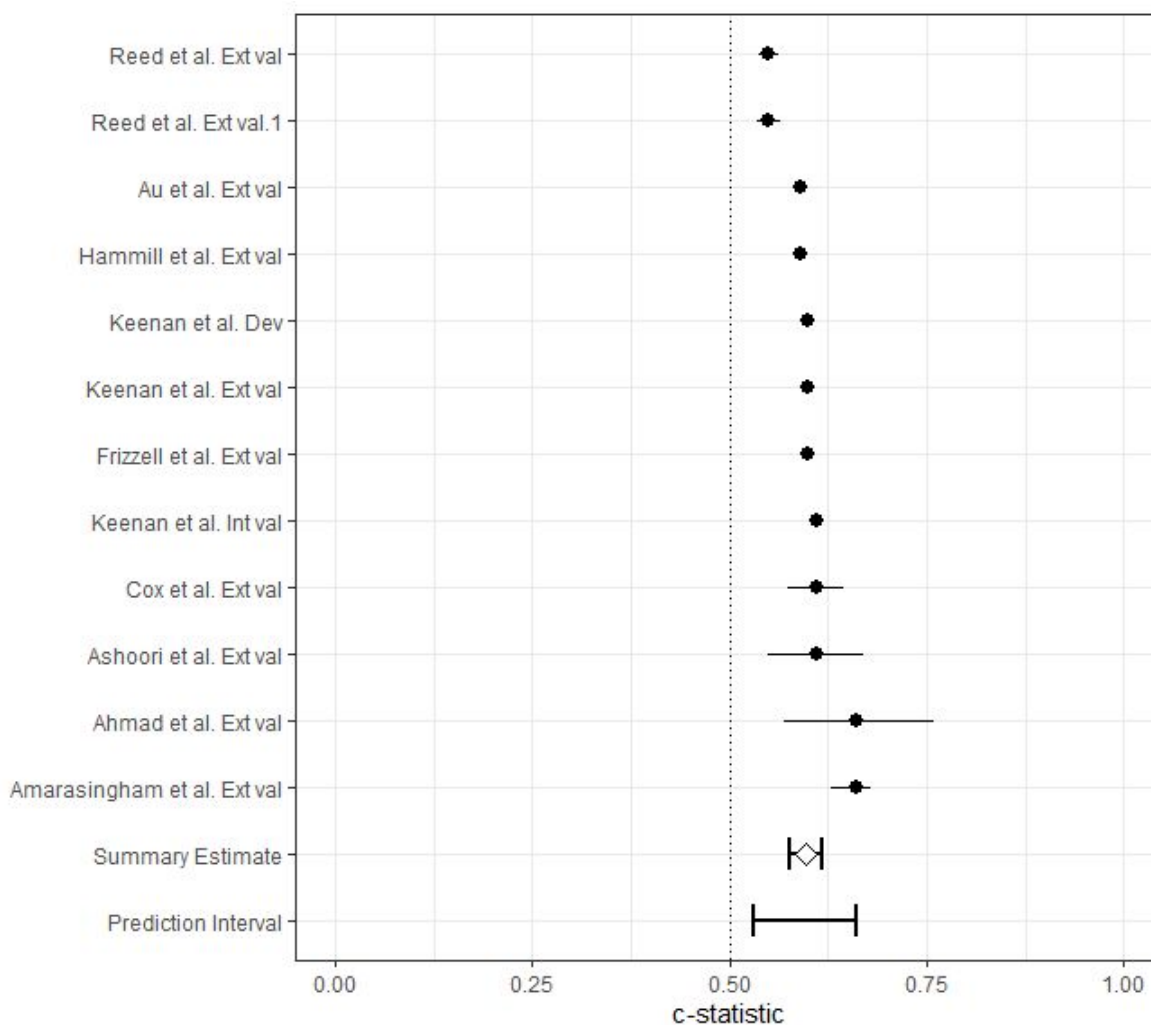

Legend: The CMS heart failure (HF) administrative model was evaluated in twelve independent cohorts in nine studies: 0.60, 95% CI 0.58 to 0.62, 95% prediction interval 0.53 to 0.66. Standard errors were derived from the reported c-statistics, sample size and observed events. The readmission rate was missing for the internal validation cohort in the Keenan et al. study, and this data was needed to derive the observed events. The development and validation cohort in the Keenan et al. study were similar samples and we used the average readmission rate from these two cohorts to impute the missing readmission rate for the internal validation.

Abbreviations: Ext val: external validation, Int val: internal validation, Dev: Development

**Supplemental Figure 3. Meta-analysis of CMS medical model**

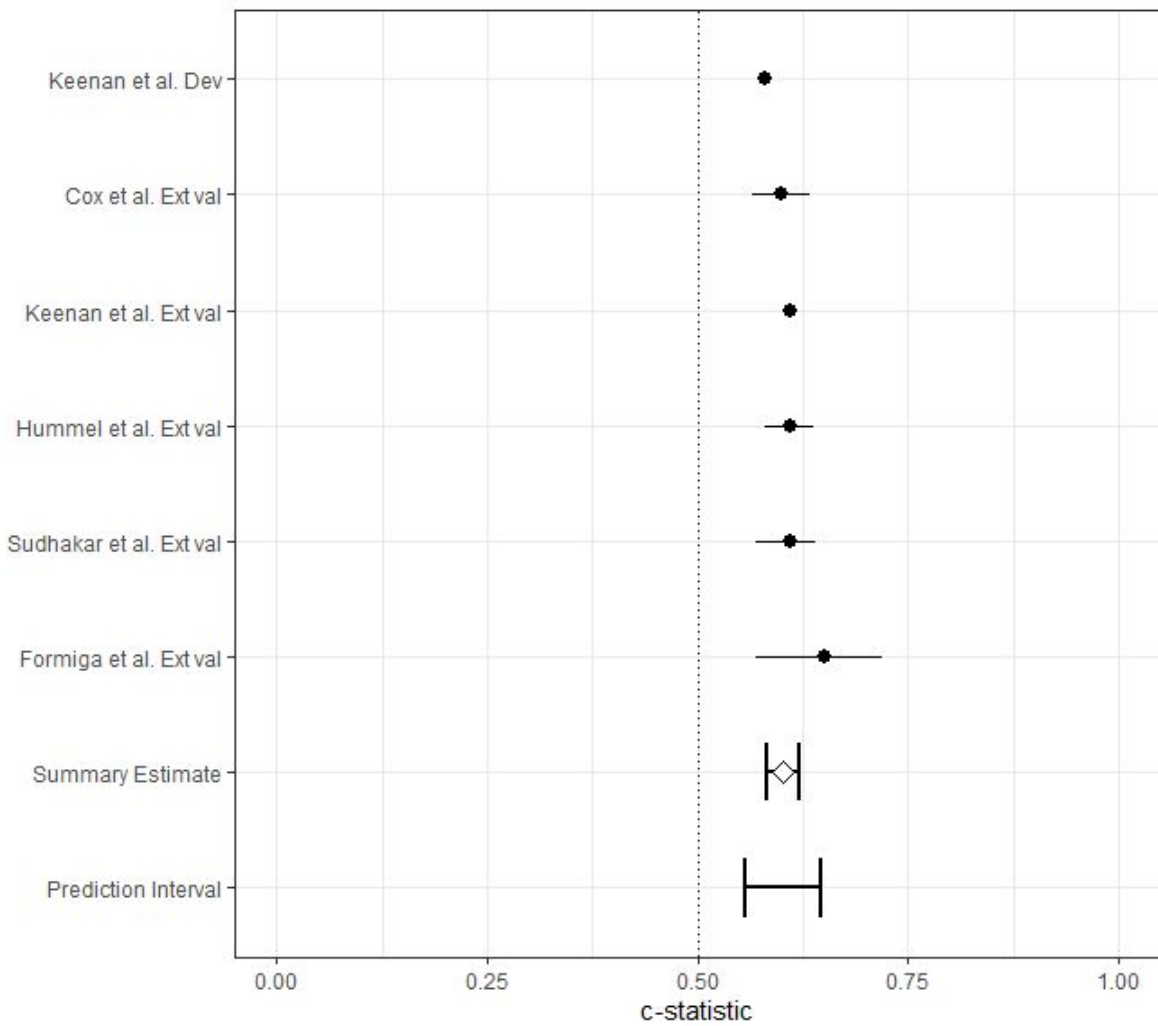

Legend: The CMS medical model was evaluated in six independent cohorts in five studies: 0.60, 95% CI 0.58 to 0.62, 95% prediction interval 0.56 to 0.65. Standard errors were derived from the reported c-statistics, sample size and observed events.

Abbreviations: Ext val: external validation, Int val: internal validation, Dev: Development

### Supplemental Figure 4. Meta-analysis of HOSPITAL score

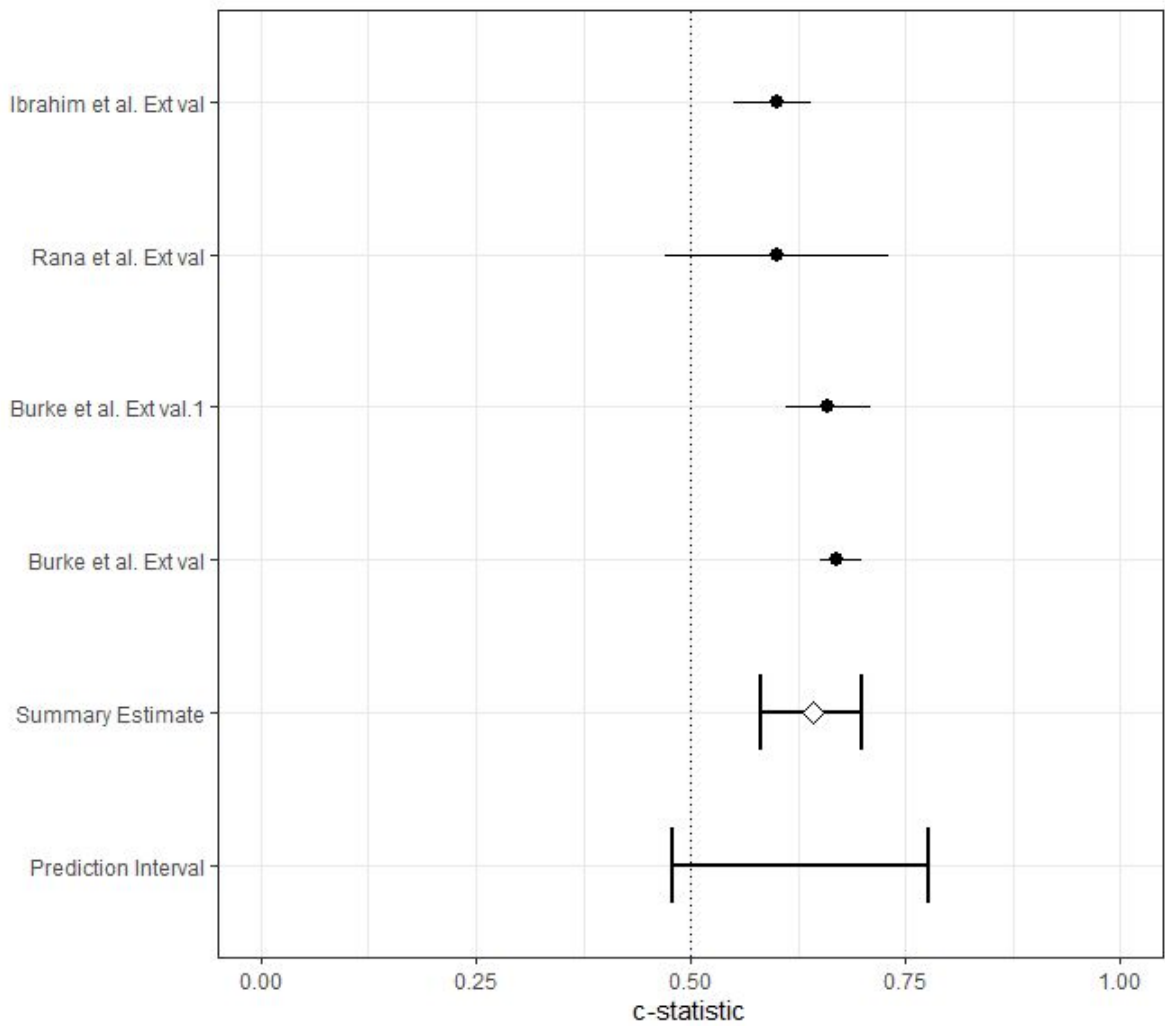

Legend: The HOSPITAL score was evaluated in four independent cohorts in three studies: 0.64, 95% CI 0.58 to 0.70, 95% prediction interval 0.48 to 0.78. Standard errors were derived from the reported c-statistics, sample size and observed events.

Abbreviations: Ext val: external validation, Int val: internal validation, Dev: Development

Supplemental Figure 5. Meta-analysis of GRACE

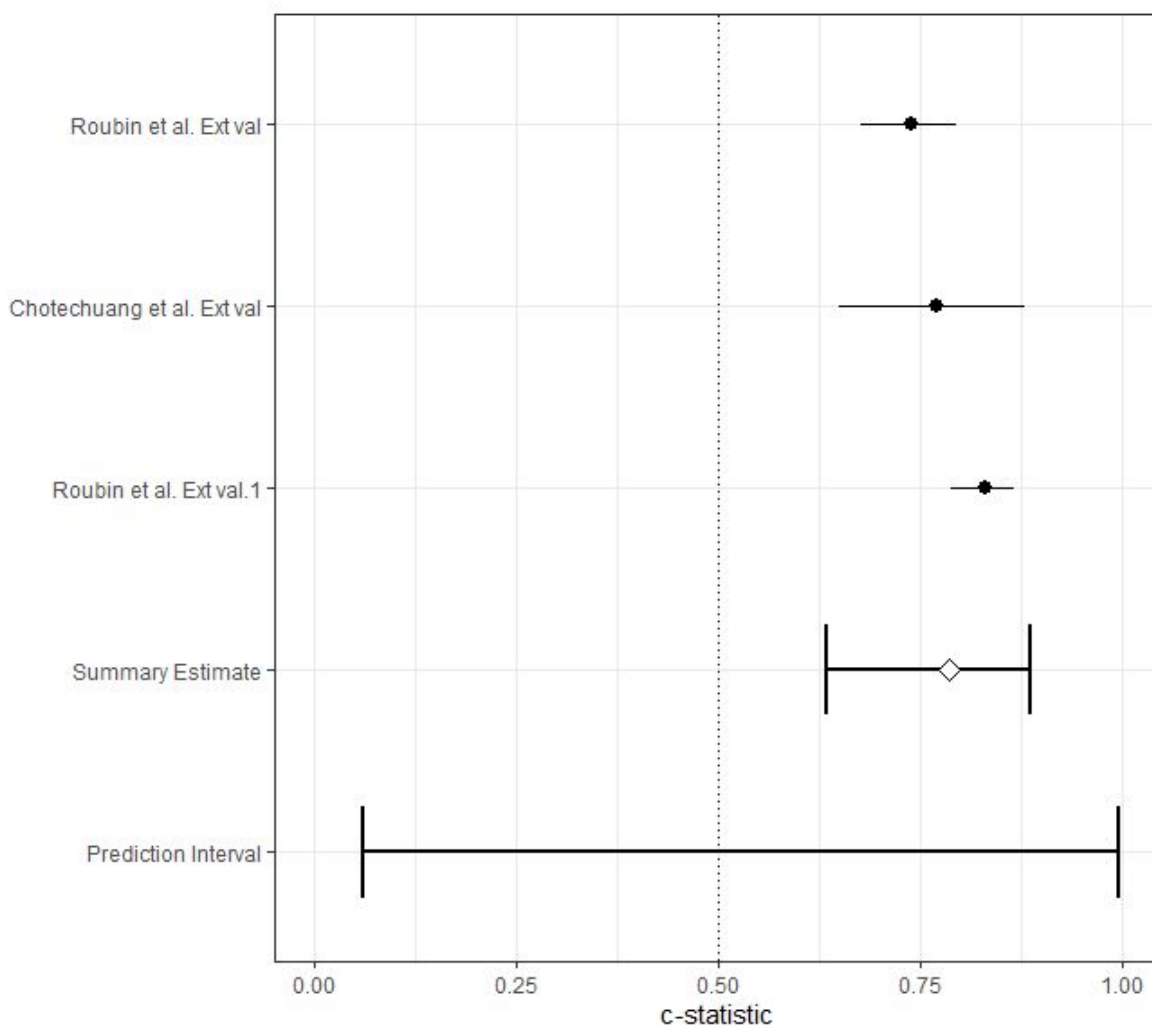

Legend: GRACE was evaluated in four independent cohorts in three studies: 0.79, 95% CI 0.63 to 0.86, 95% prediction interval 0.06 to 1.00. Standard errors were derived from the reported c-statistics, sample size and observed events.

Abbreviations: Ext val: external validation, Int val: internal validation, Dev: Development

### Supplemental Figure 6. Meta-analysis of LACE

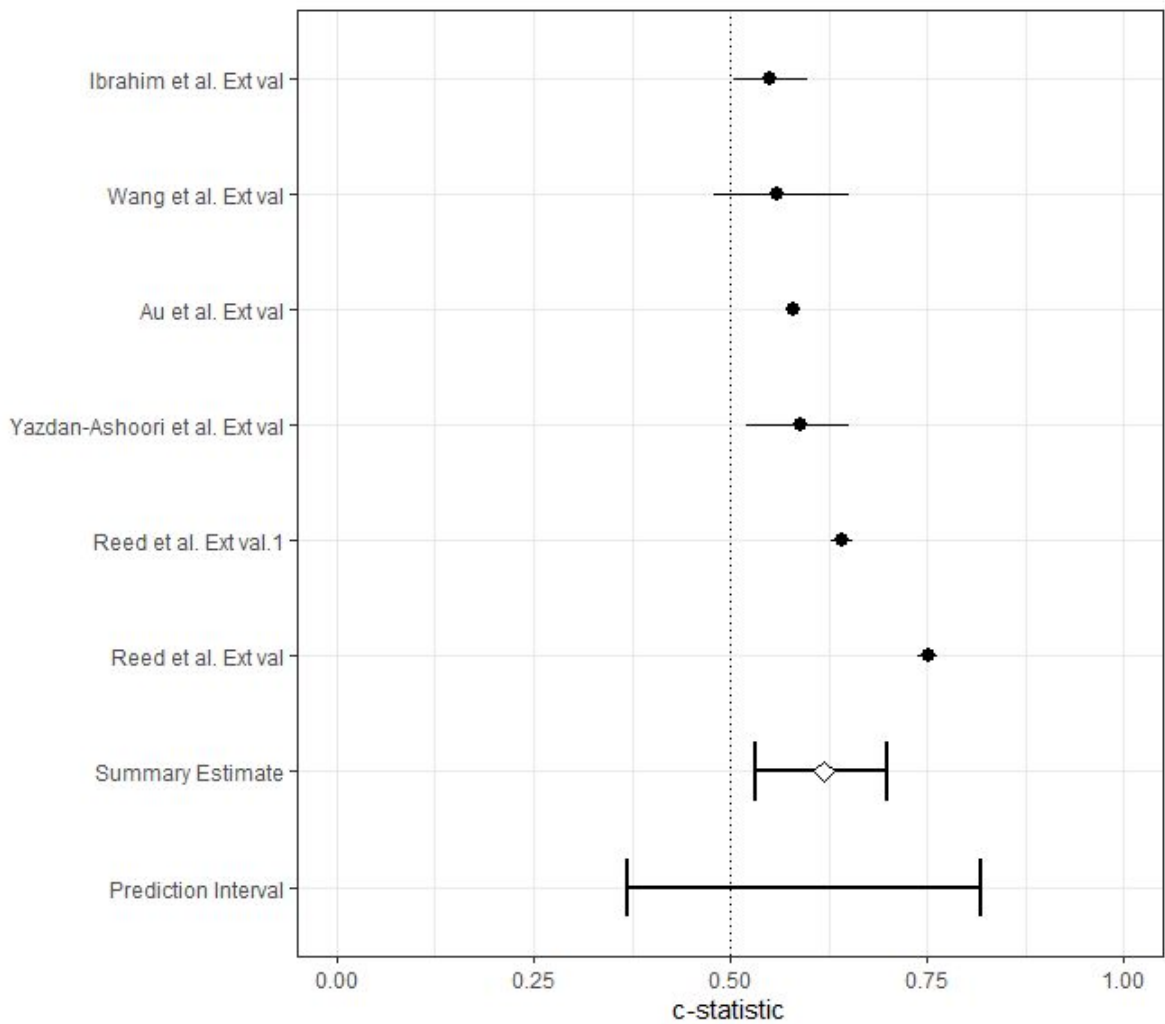

Legend: LACE was evaluated in six independent cohorts in five studies: 0.62, 95% CI 0.53 to 0.70, 95% prediction interval 0.37 to 0.82. Standard errors were derived from the reported c-statistics, sample size and observed events.

Abbreviations: Ext val: external validation, Int val: internal validation, Dev: Development

**Supplemental Figure 7. Age as moderator**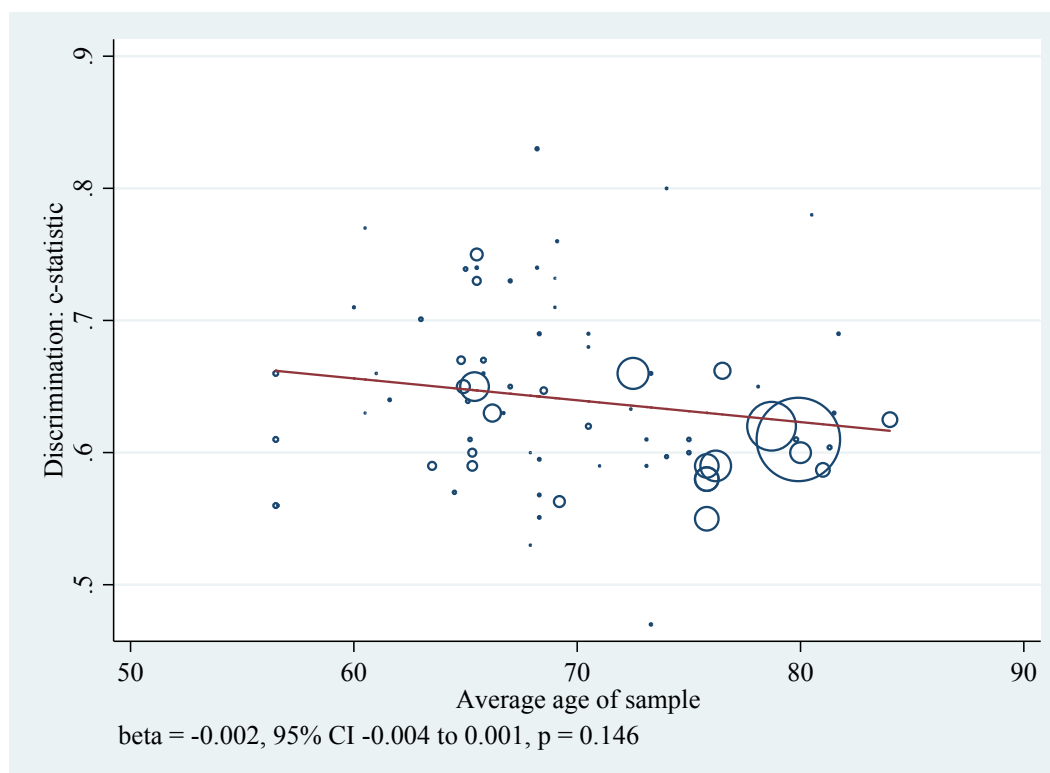

Legend: A meta-regression with average sample age as covariate was performed. The outcome was the discrimination (c-statistic). There is no association between the sample age and the discrimination.

**Supplemental Figure 8. Number of predictors as moderator**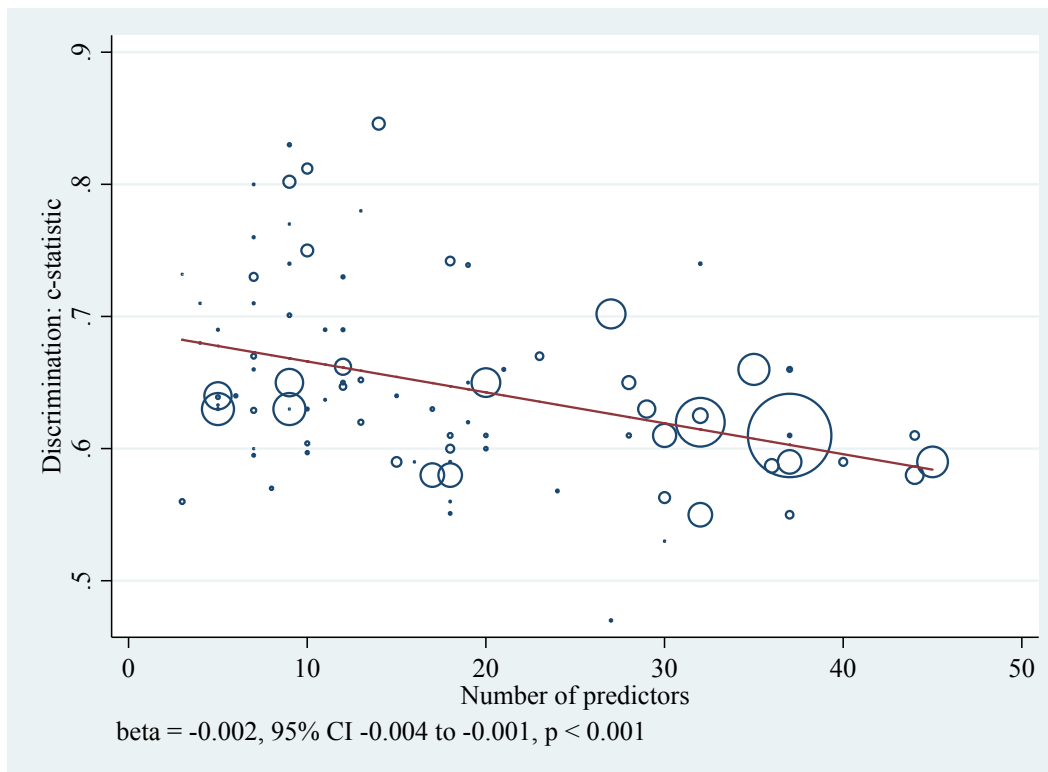

Legend: A meta-regression with the number of predictors as covariate was performed. The outcome was the discrimination (c-statistic). The discrimination increases with the number of predictors decreases. This association is significant.

## Supplemental Table 2. Subgroup analyses

| Moderators                    | N  | C-statistic | 95% CI        | Test for subgroup difference |
|-------------------------------|----|-------------|---------------|------------------------------|
| <b>Population</b>             |    |             |               | p = 0.835                    |
| - Surgical                    | 17 | 0.627       | 0.605 – 0.649 |                              |
| - TAVR                        | 2  | 0.645       | 0.560 – 0.729 |                              |
| - Heart failure               | 45 | 0.641       | 0.623 – 0.658 |                              |
| - Acute myocardial infarction | 16 | 0.671       | 0.644 – 0.697 |                              |
| - Arrhythmias                 | 5  | 0.640       | 0.630 – 0.649 |                              |
| - Valve disease               | 1  | 0.650       | 0.641 – 0.659 |                              |
| - ICD implantation            | 1  | 0.710       | 0.605 – 0.815 |                              |
| - Reinfarction                | 1  | 0.740       | 0.681 – 0.799 |                              |
| - Acute coronary syndrome     | 1  | 0.590       | 0.475 – 0.705 |                              |
| - Mixed                       | 3  | 0.660       | 0.656 – 0.664 |                              |
| <b>Data source</b>            |    |             |               | p = 0.014                    |
| - Registry                    | 17 | 0.613       | 0.602 – 0.624 |                              |
| - Administrative database     | 17 | 0.664       | 0.635 – 0.693 |                              |
| - Hospital database           | 18 | 0.612       | 0.593 – 0.632 |                              |
| - Prospective cohort          | 16 | 0.640       | 0.613 – 0.667 |                              |
| - Retrospective cohort        | 23 | 0.682       | 0.653 – 0.710 |                              |
| - Secondary analysis          | 2  | 0.695       | 0.497 – 0.894 |                              |
| <b>Endpoint</b>               |    |             |               | p = 0.589                    |
| - 15 days                     | 1  | 0.633       | 0.539 – 0.727 |                              |
| - 28 days                     | 1  | 0.800       | 0.720 – 0.880 |                              |
| - 30 days                     | 78 | 0.642       | 0.631 – 0.654 |                              |
| - 90 days                     | 8  | 0.645       | 0.632 – 0.657 |                              |
| - 100 days                    | 1  | 0.652       | 0.626 – 0.678 |                              |
| - 180 days                    | 4  | 0.656       | 0.591 – 0.721 |                              |
| <b>Outcome definition</b>     |    |             |               | p = 0.144                    |
| - All cause                   | 65 | 0.644       | 0.633 – 0.656 |                              |
| - Cardiac related             | 18 | 0.676       | 0.628 – 0.723 |                              |

Legend: Subgroup analyses were performed. The outcome was the discrimination (c-statistic). The discrimination is moderator by the data source that was used in the study, but not by the population, outcome definition and endpoint.



**Supplemental Table 3. Summary of meta-analyses predictors**

| Predictor                                | Coefficient, 95% CI | Prediction interval |
|------------------------------------------|---------------------|---------------------|
| Age (years)                              | 0.01, 0.00 - 0.01   | -0.01 - 0.03        |
| Female                                   | 0.10, 0.03 - 0.17   | -0.17 - 0.38        |
| Arrhythmias                              | 0.20, 0.12 - 0.28   | -0.04 - 0.43        |
| Chronic lung disease                     | 0.23, 0.05 - 0.40   | -0.35 - 0.80        |
| Chronic obstructive pulmonary disease    | 0.18, 0.15 - 0.22   | 0.08 - 0.29         |
| Artherosclerosis                         | 0.01, -0.13 - 0.15  | -0.38 - 0.41        |
| Diabetes mellitus                        | 0.16, 0.11 - 0.22   | -0.04 - 0.37        |
| Current heart failure                    | 0.27, 0.20 - 0.34   | 0.04 - 0.50         |
| Hypertension                             | 0.05, -0.02 - 0.12  | -0.16 - 0.25        |
| Valve disease                            | 0.10, 0.06 - 0.13   | 0.01 - 0.19         |
| Prior percutaneous coronary intervention | 0.01, -0.07 - 0.09  | -0.27 - 0.29        |
| History of heart failure                 | 0.38, 0.25 - 0.51   | 0.01 - 0.75         |
| Cerebrovascular disease                  | 0.08, 0.03 - 0.13   | -0.05 - 0.22        |
| Anemia                                   | 0.10, 0.06 - 0.14   | -0.01 - 0.22        |
| Stroke                                   | 0.07, 0.01 - 0.13   | -0.11 - 0.25        |
| Peripheral vascular disease              | 0.15, 0.09 - 0.21   | -0.03 - 0.34        |
| Dementia                                 | -0.04, -0.10 - 0.02 | -0.21 - 0.12        |
| Prior Coronary Artery Bypass Graft       | 0.04, -0.06 - 0.14  | -0.30 - 0.39        |

Legend: A meta-analyses was performed with the outcome 30 day unplanned hospital readmissions. The forest plots are detailed below. Please note that there are some small differences with the data reported in Figure 4 in the main manuscript. This is because of a difference in rounding the decimal points by the software.

Supplemental Figure 9. Age as predictor

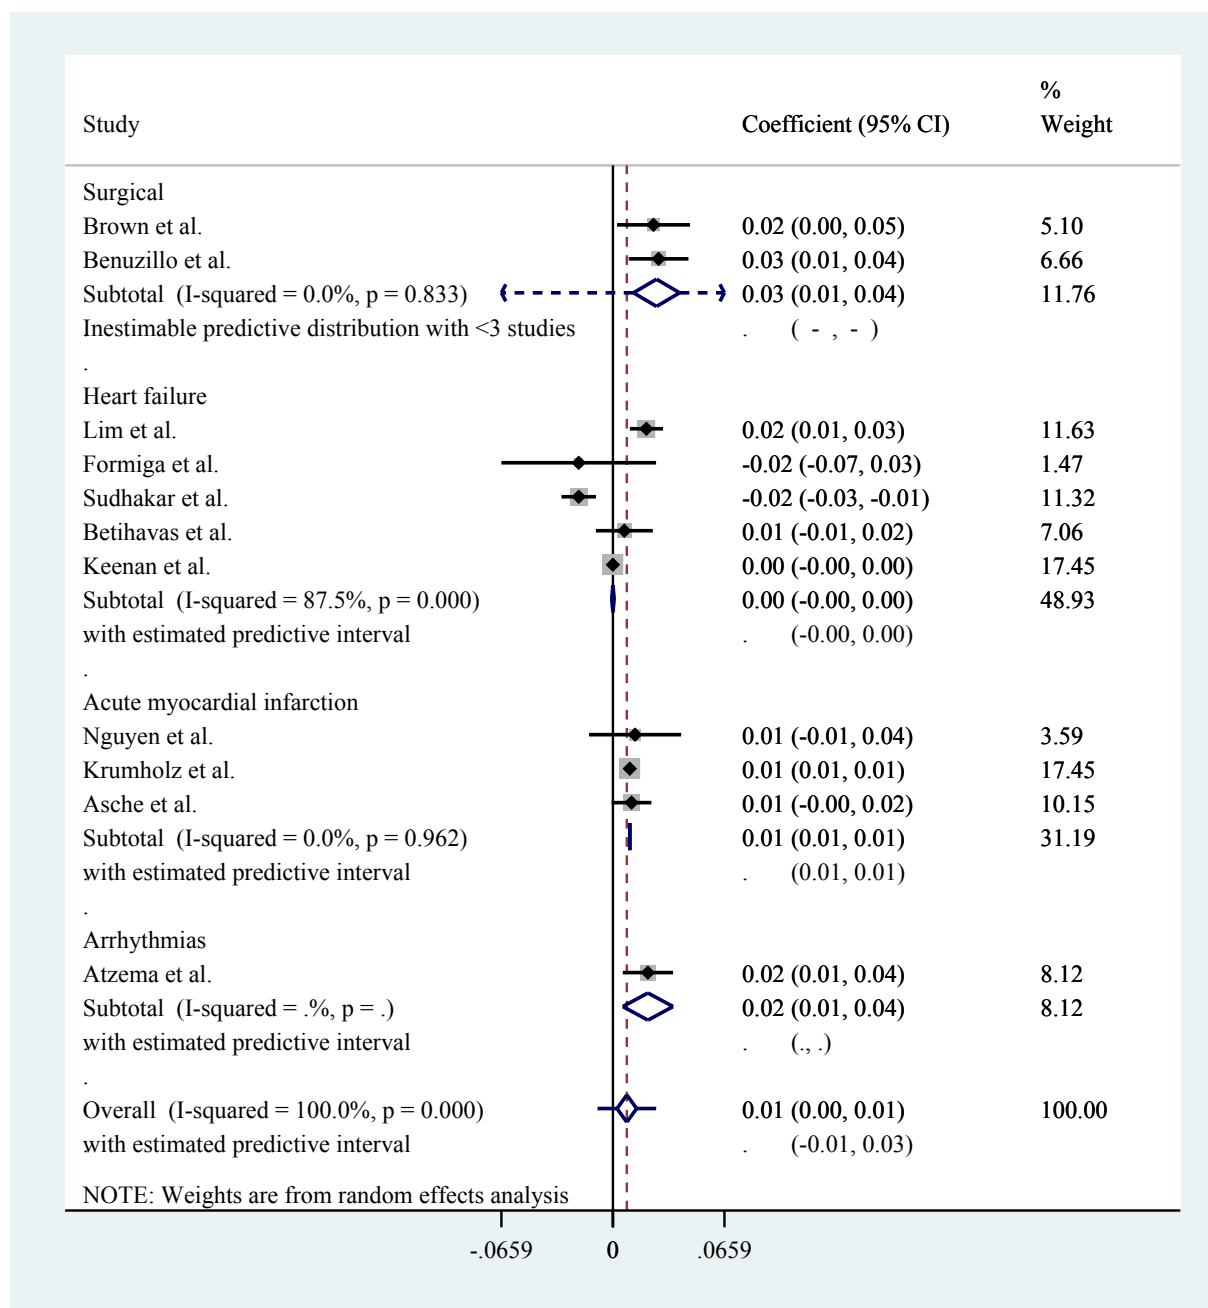

Legend: Two studies were not included in the analysis. One study had a missing standard error and one study reported transformed values. The values of their coefficients were: -0.001, and log(0,502).

## Supplemental Figure 10. Female as predictor

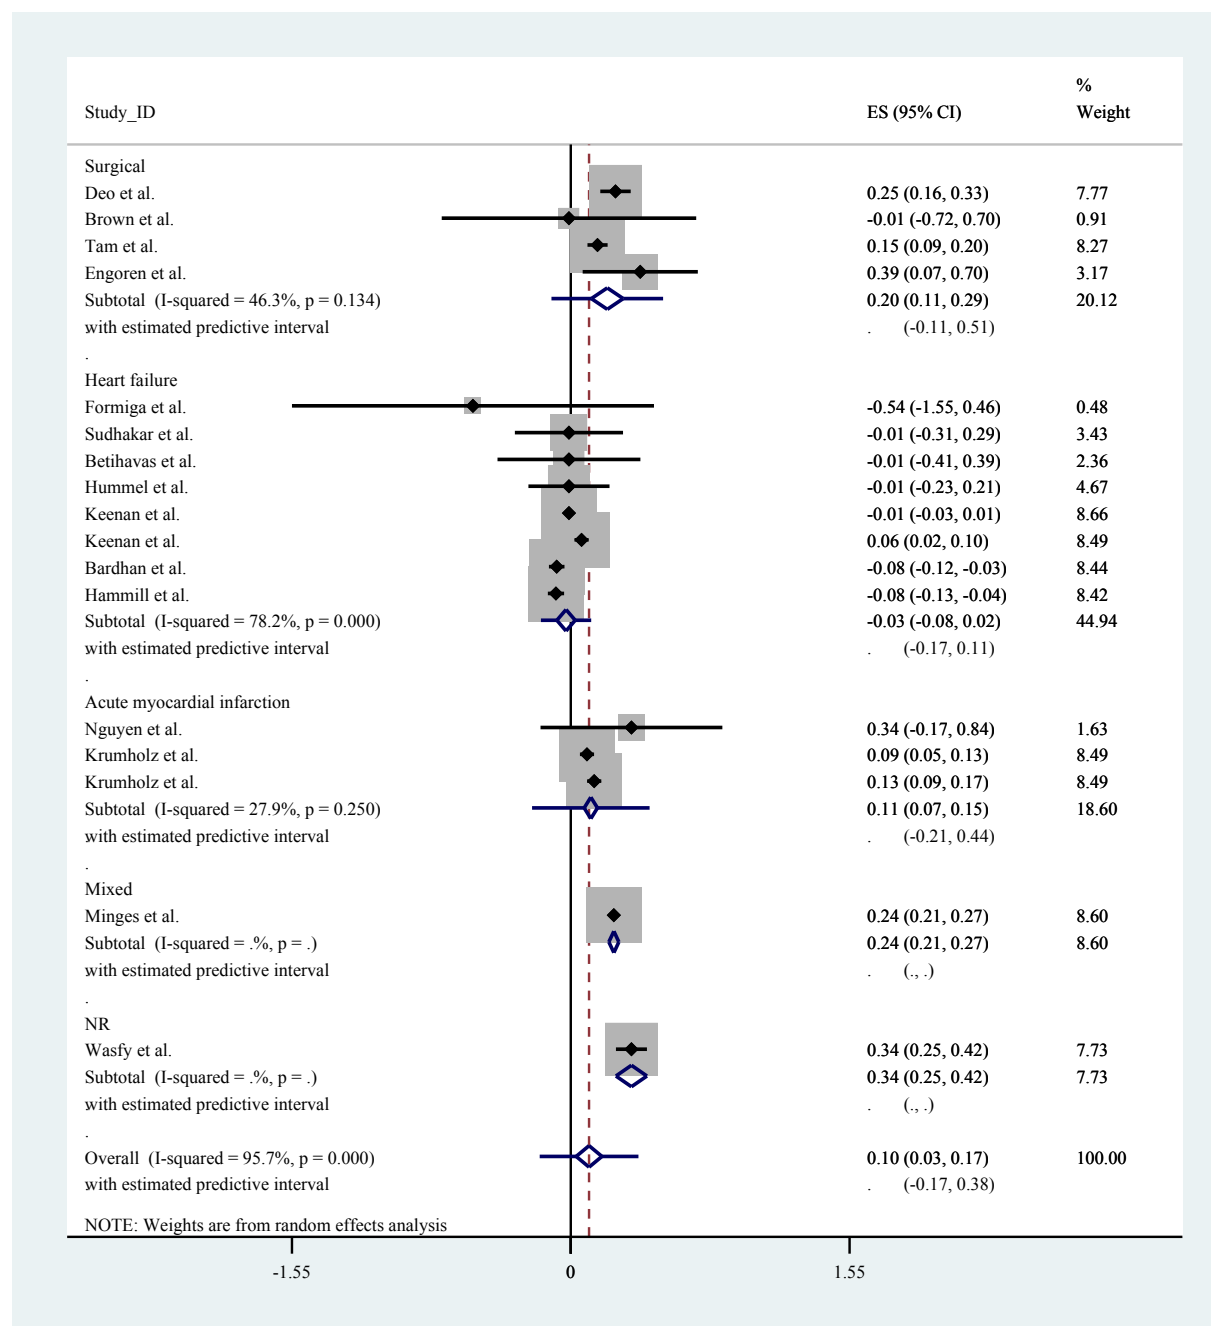

Legend: Two studies were not included in the analysis because the standard errors were missing. The values of their coefficients were: -0.28 and 0.206.

**Supplemental Figure 1. Arrhythmias as predictor**

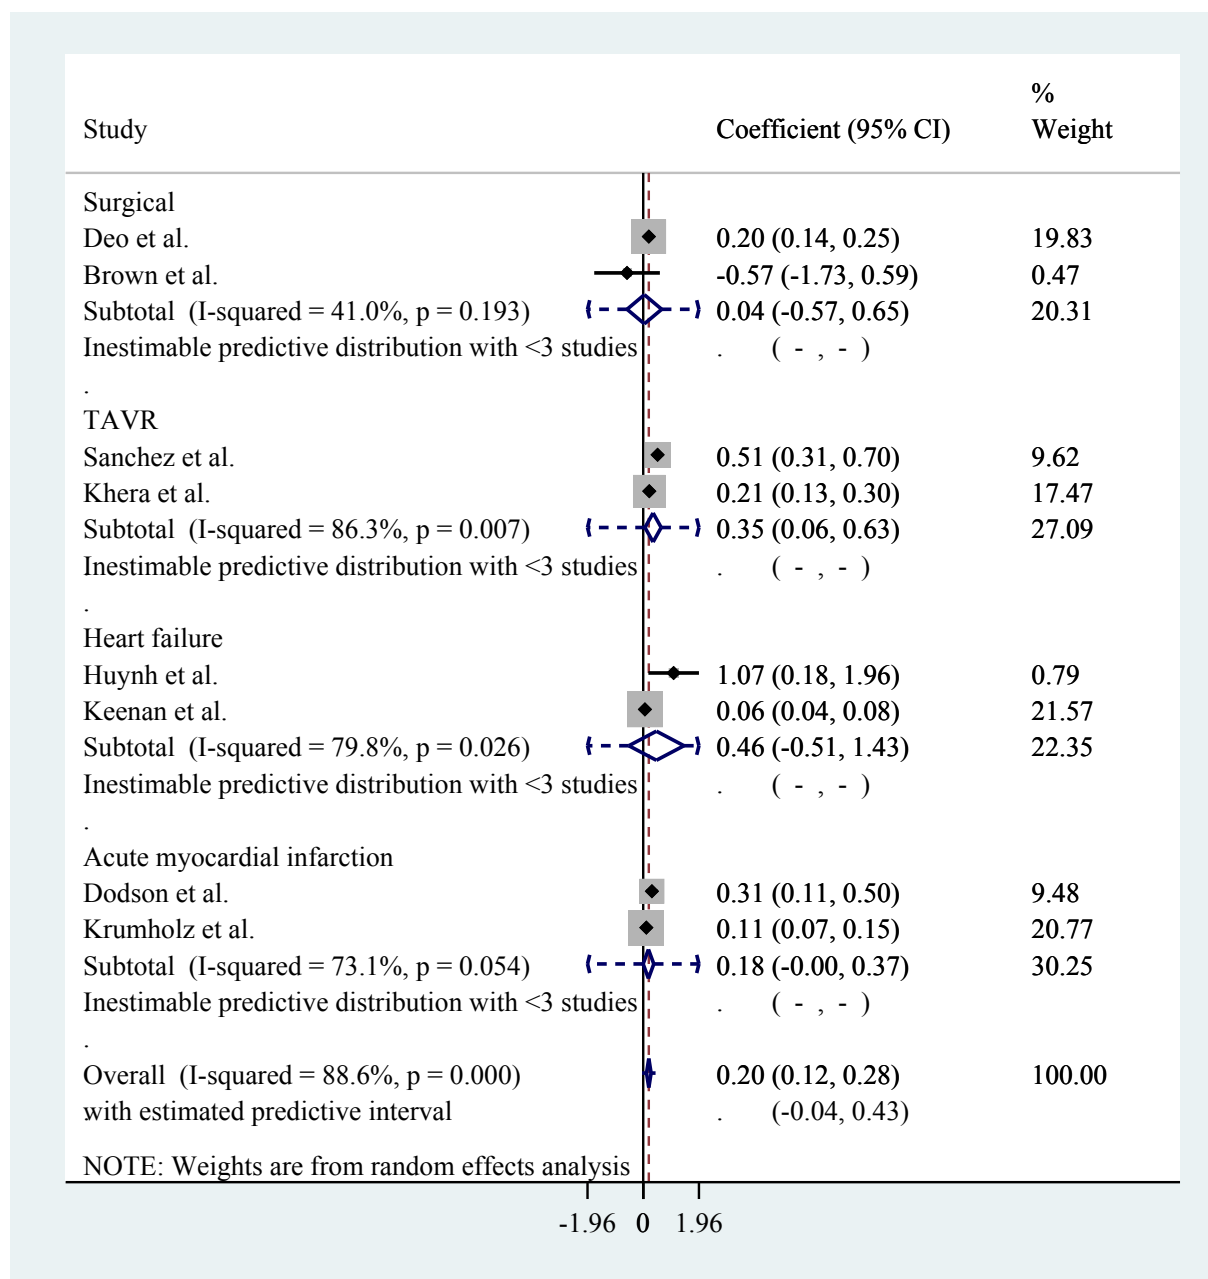

Legend: There was no missing data in the analysis.

**Supplemental Figure 12. Chronic lung disease as predictor**

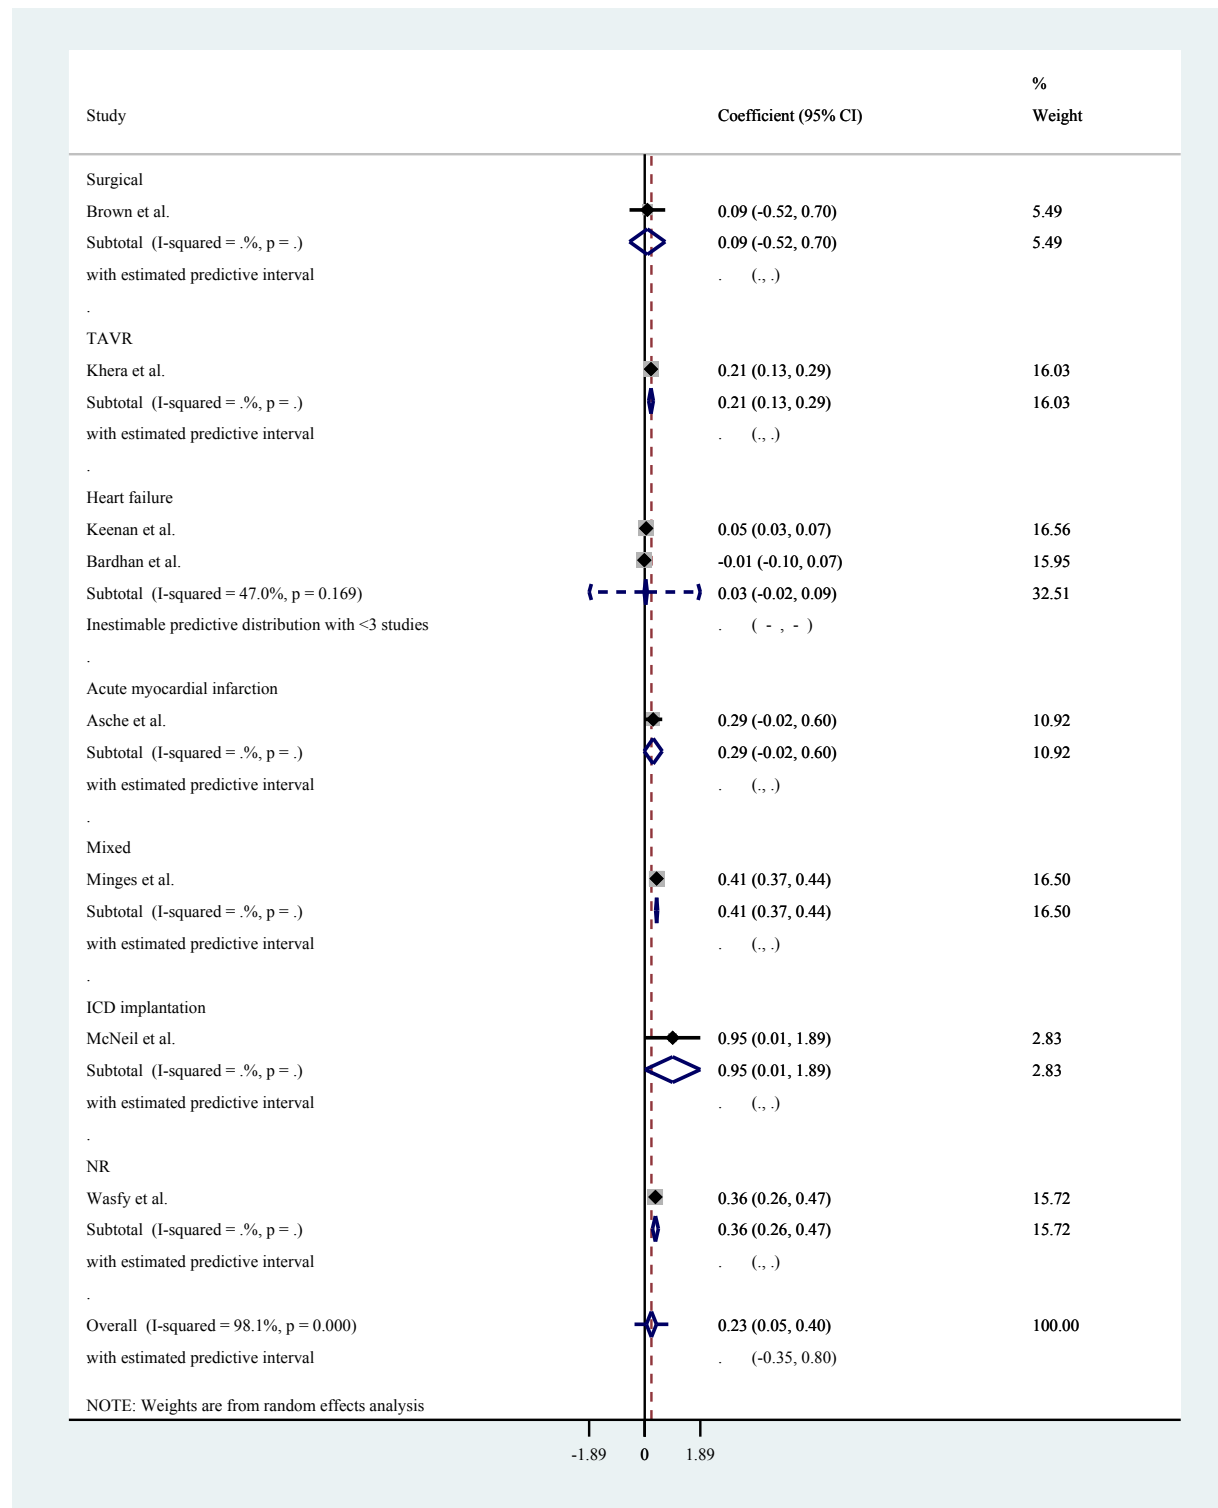

Legend: There was no missing data in the analysis.

**Supplemental Figure 13. Chronic Obstructive Pulmonary Disease as predictor**

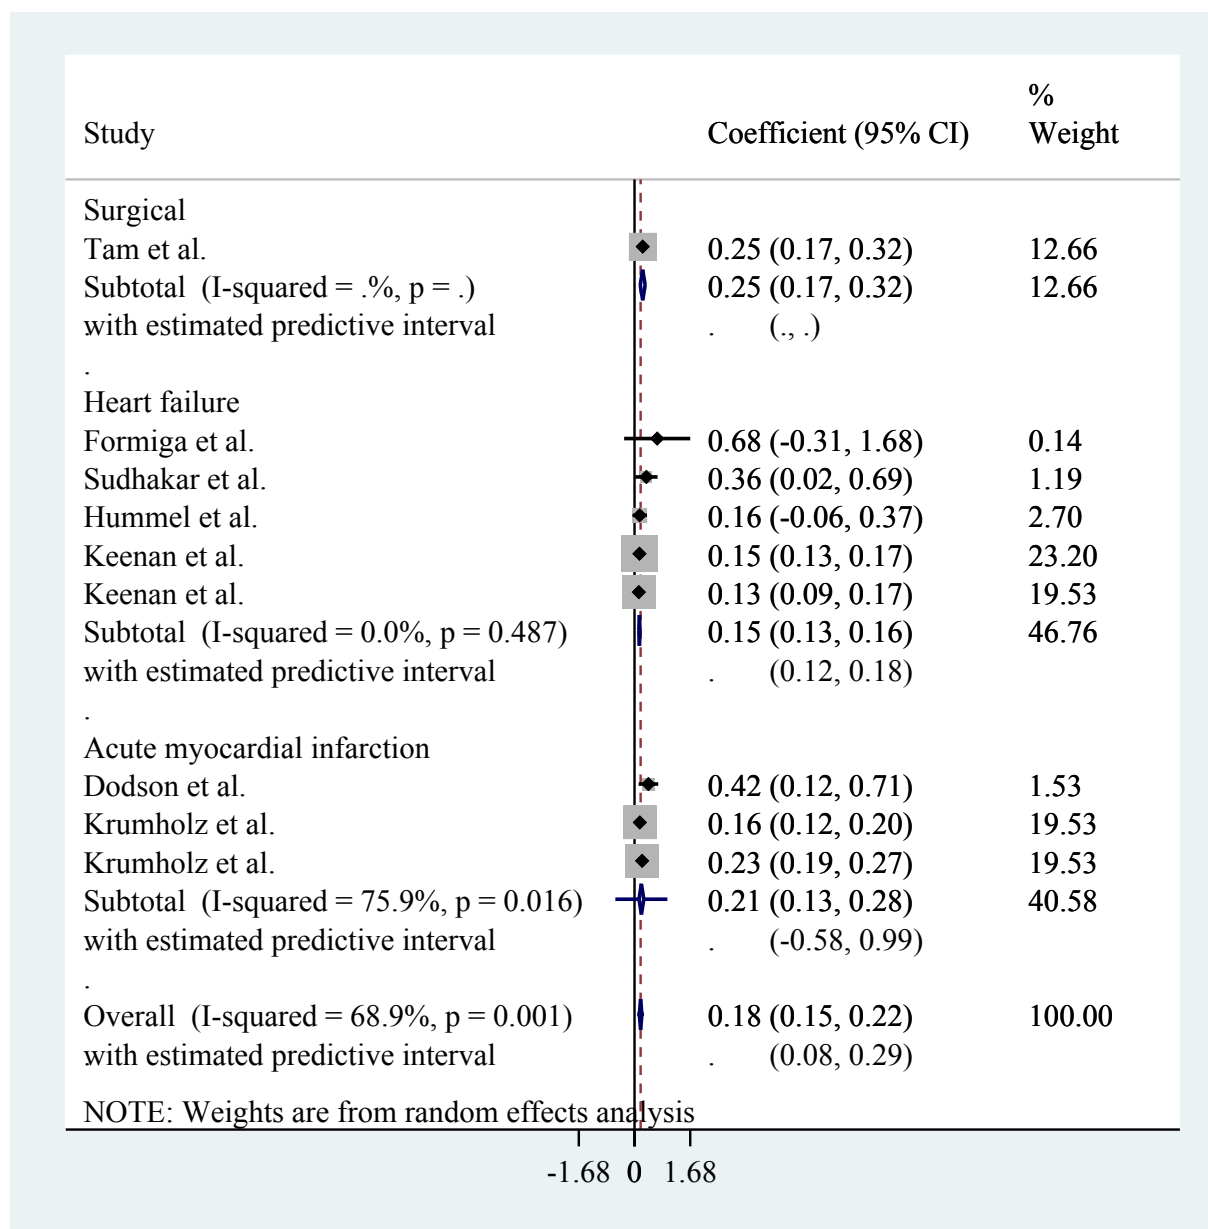

Legend: Two studies were not included in the analysis because the standard errors were missing. The values of their coefficients were: 0.053 and 0.677.

## Supplemental Figure 14. Artherosclerosis as predictor

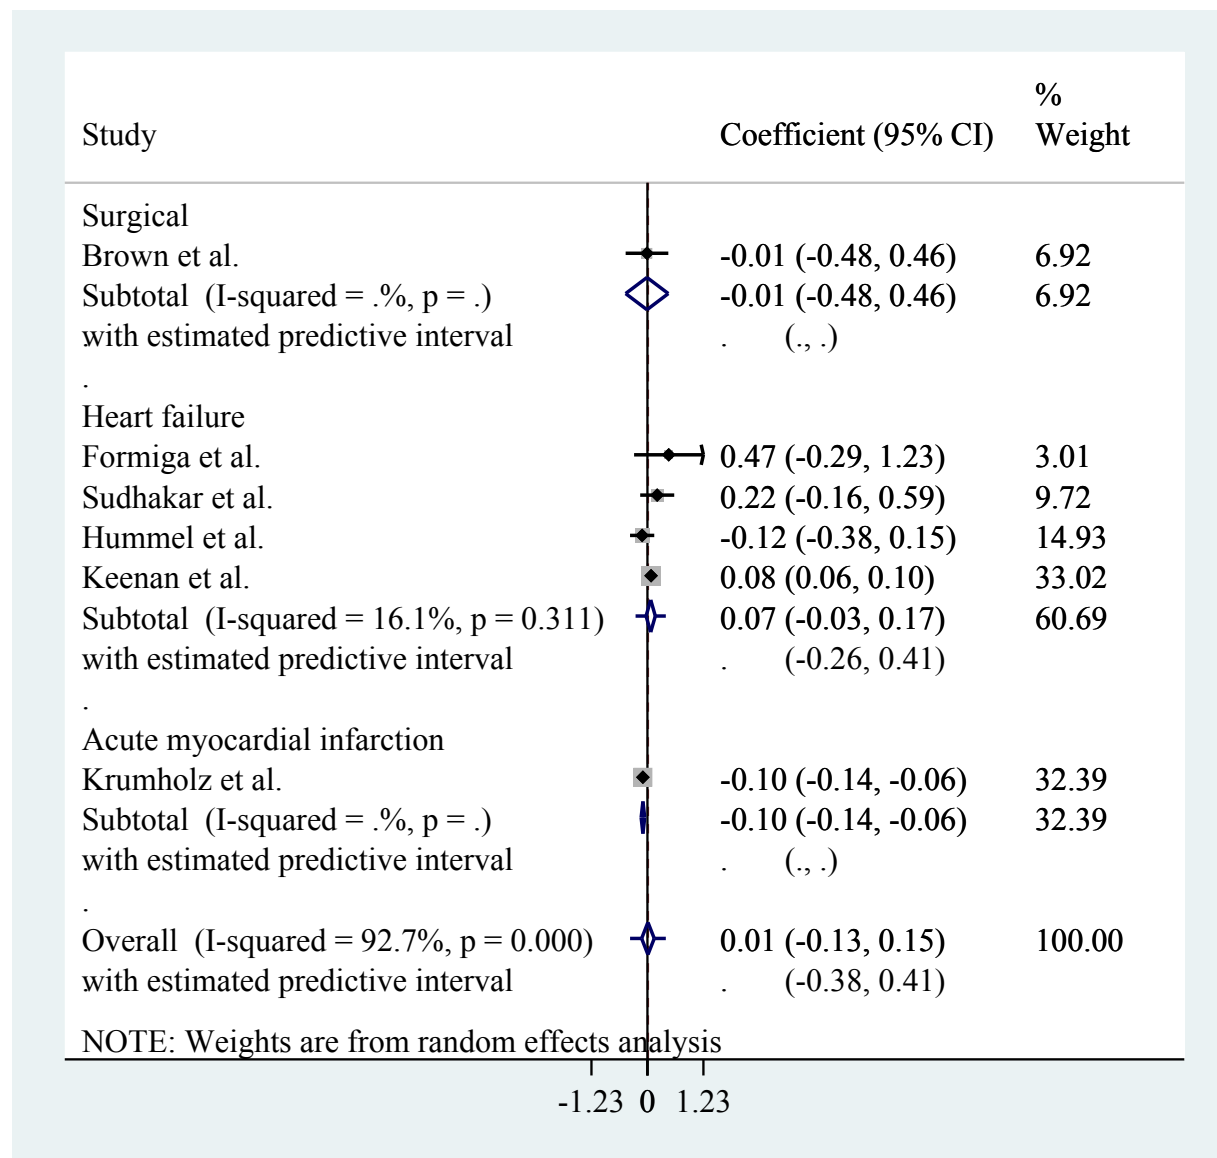

Legend: One study was not included in the analysis because the standard error were missing. The values of their coefficient was: 0.11.

Supplemental Figure 15. Diabetes Mellitus as predictor

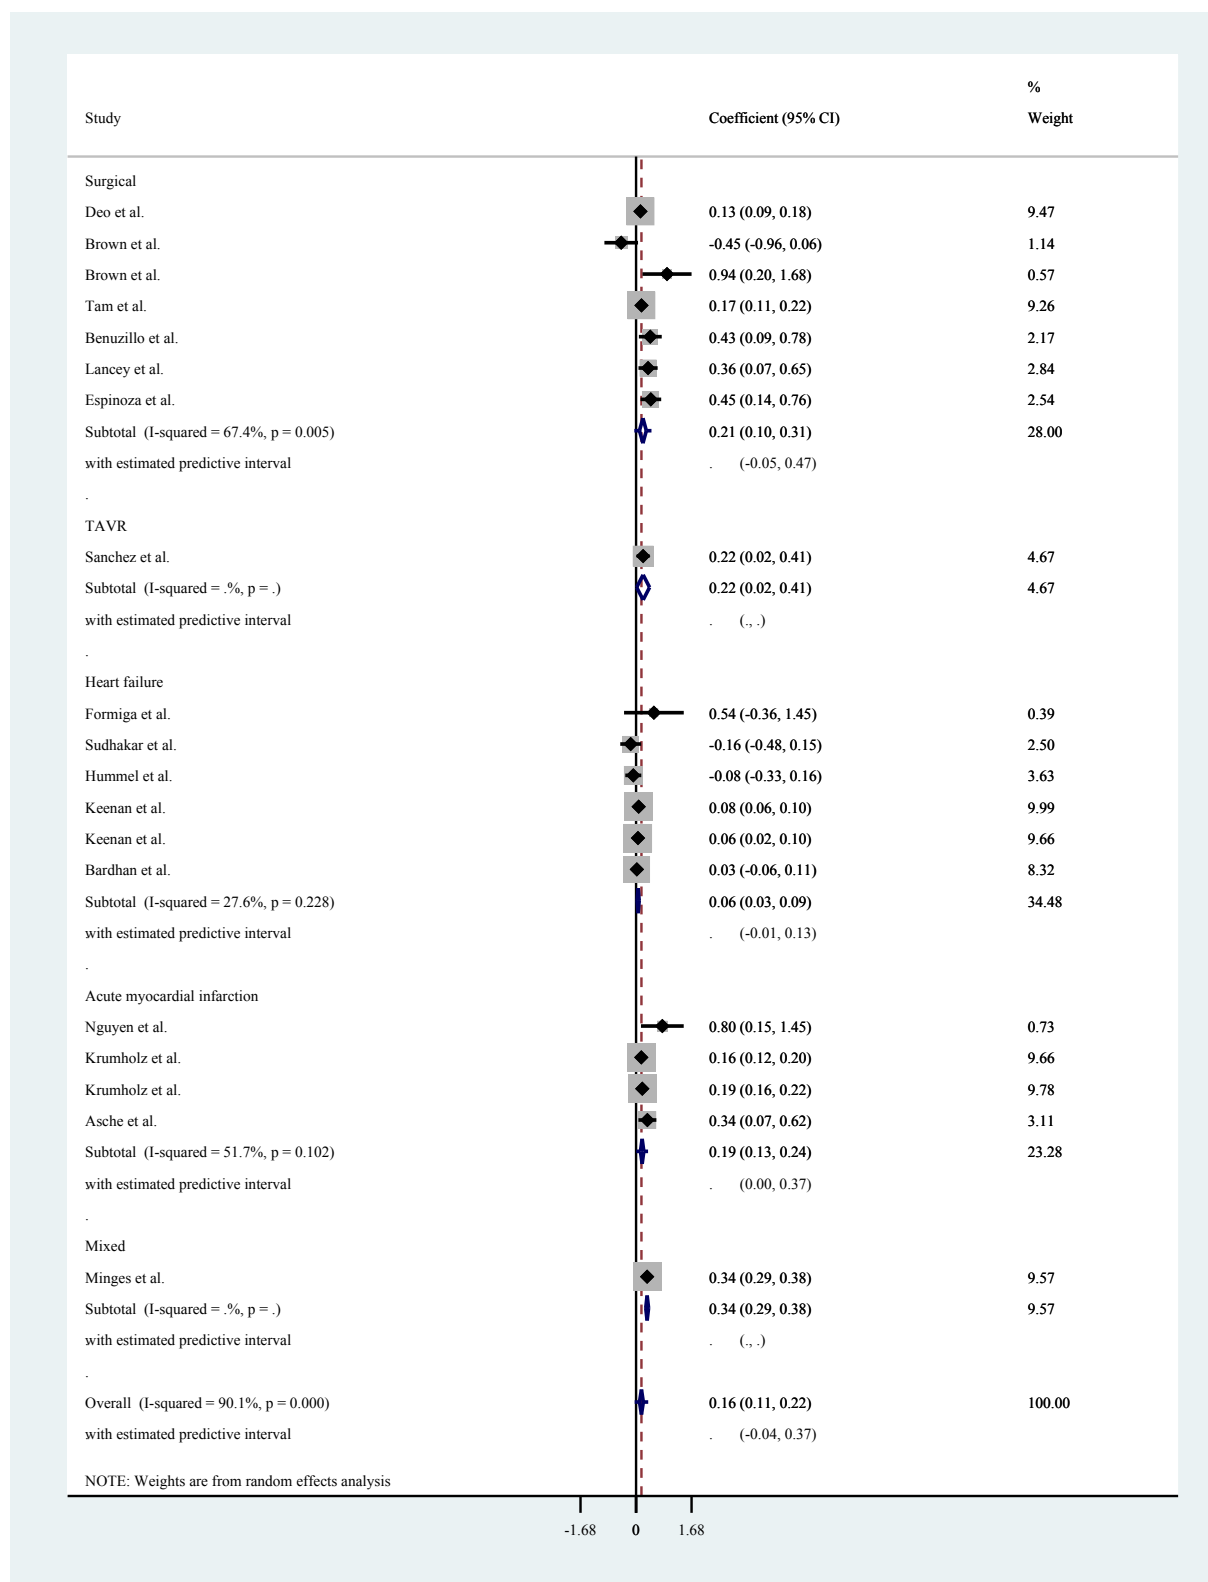

Legend: Two studies were not included in the analysis because the standard errors were missing. The values of their coefficients were: -0.068 and 0.639.



Supplemental Figure 16. Current heart failure as predictor

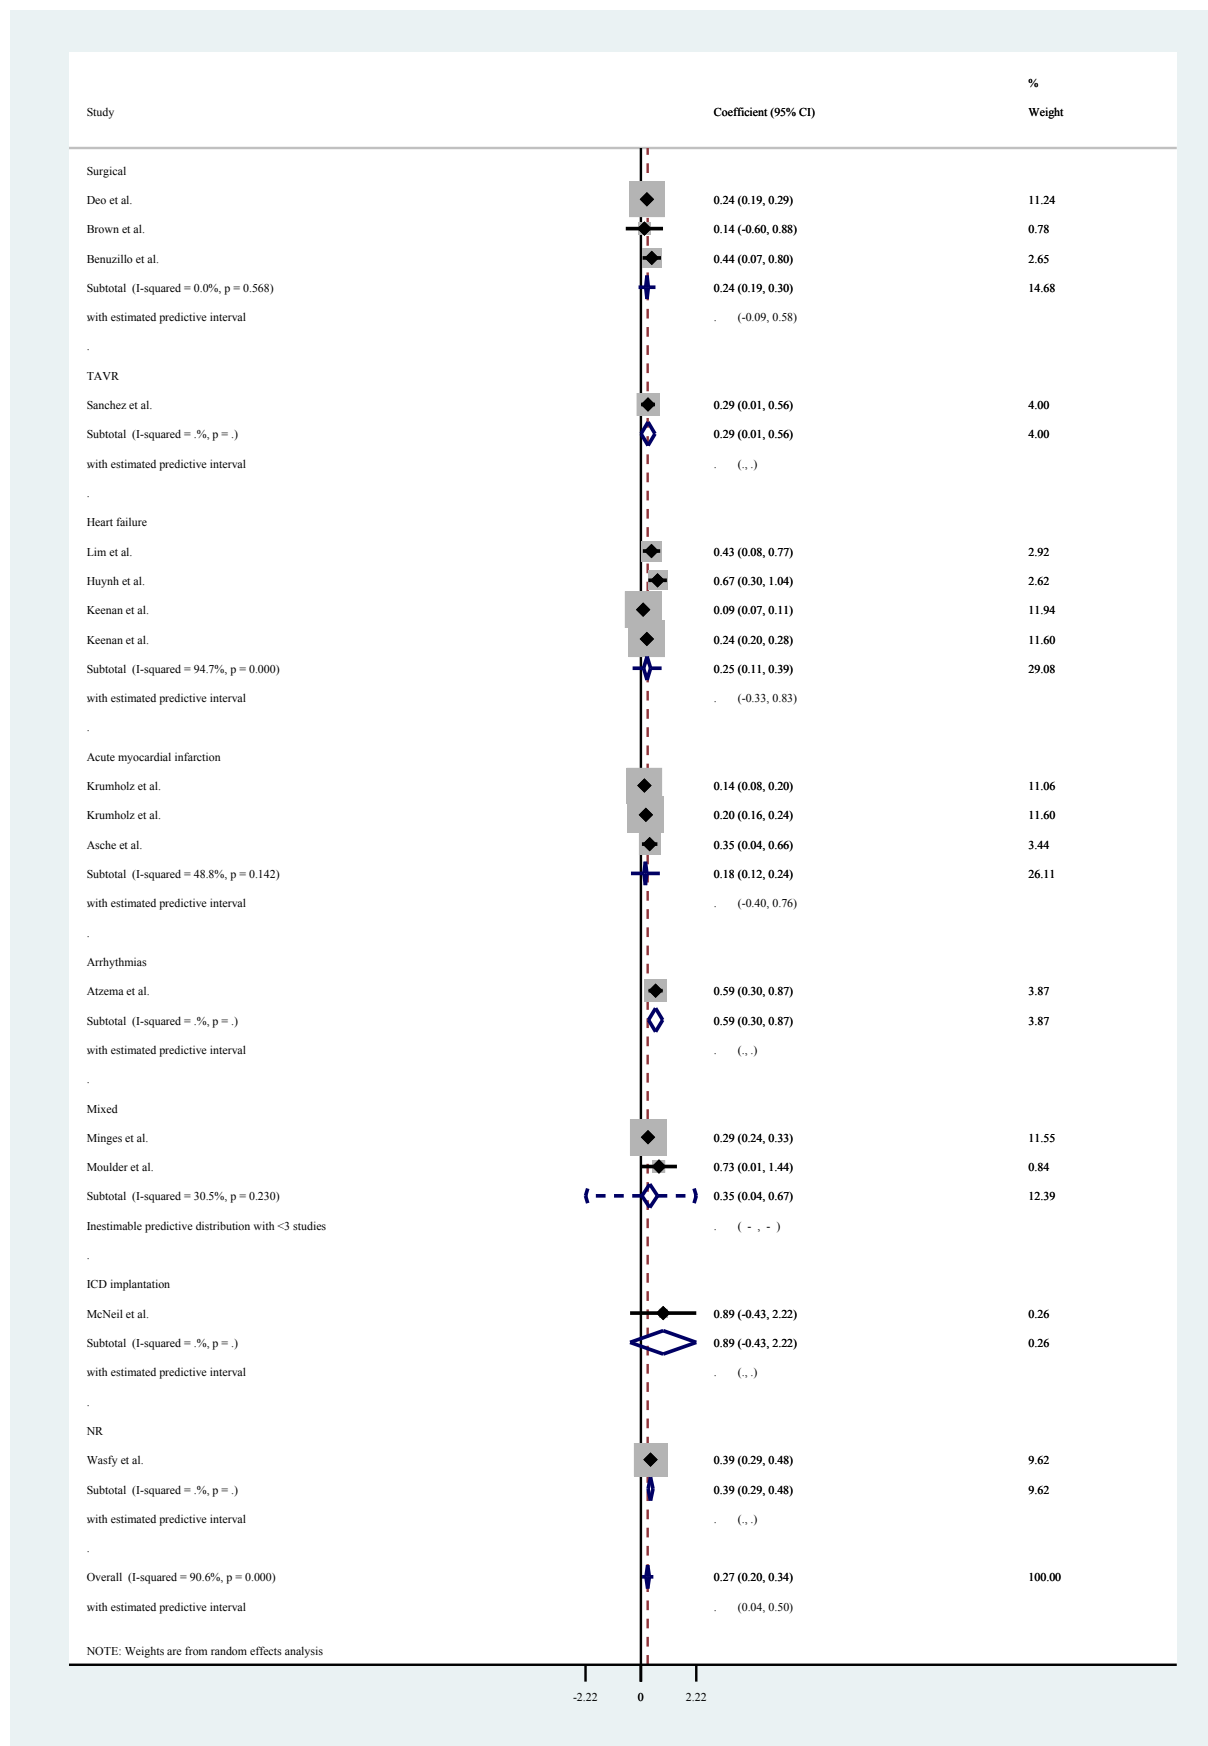

Legend: There was no missing data.

**Supplemental Figure 17. Hypertension as predictor**

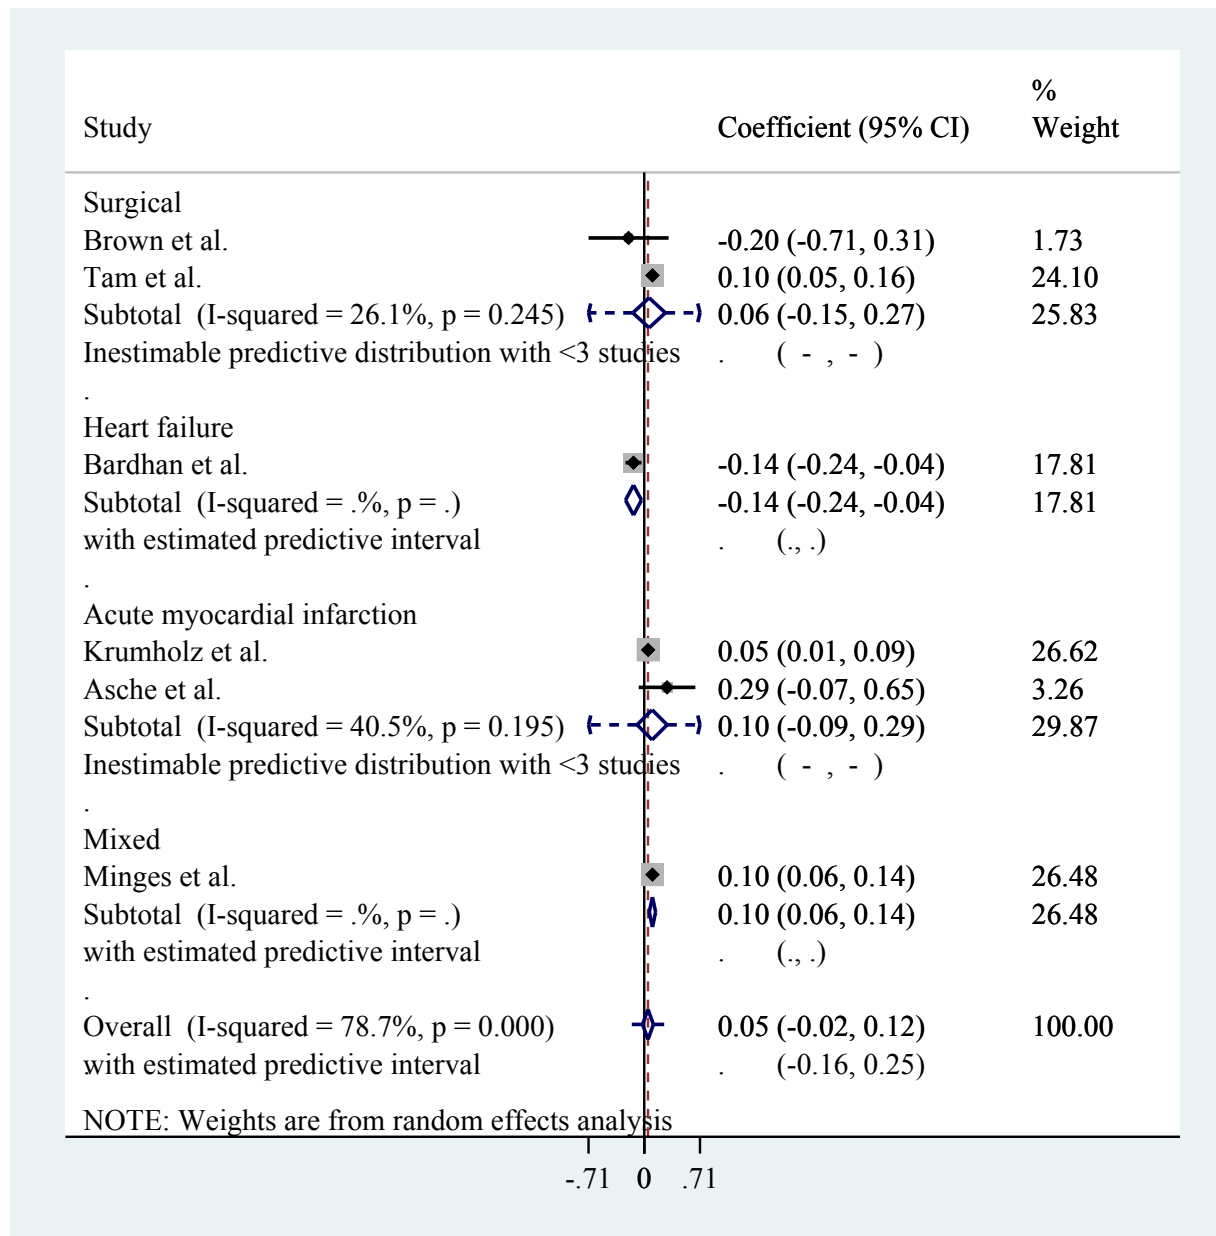

Legend: One study was not included in the analysis because the standard error were missing. The values of their coefficient was: -0.28.

## Supplemental Figure 18. Valve disease as predictor

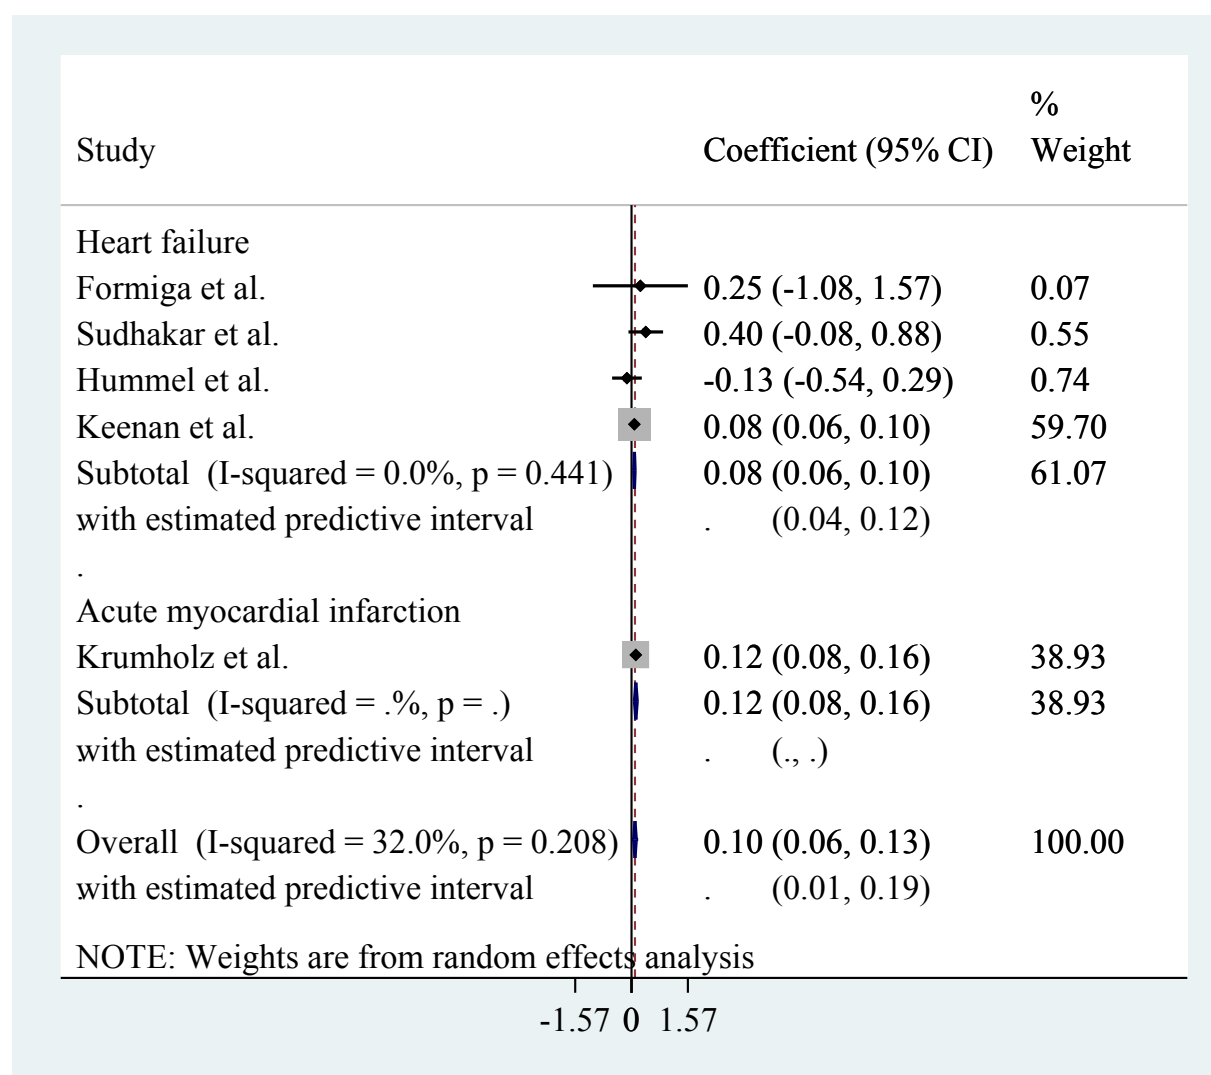

Legend: There was no missing data.

**Supplemental Figure 19. Prior percutaneous coronary intervention as predictor**

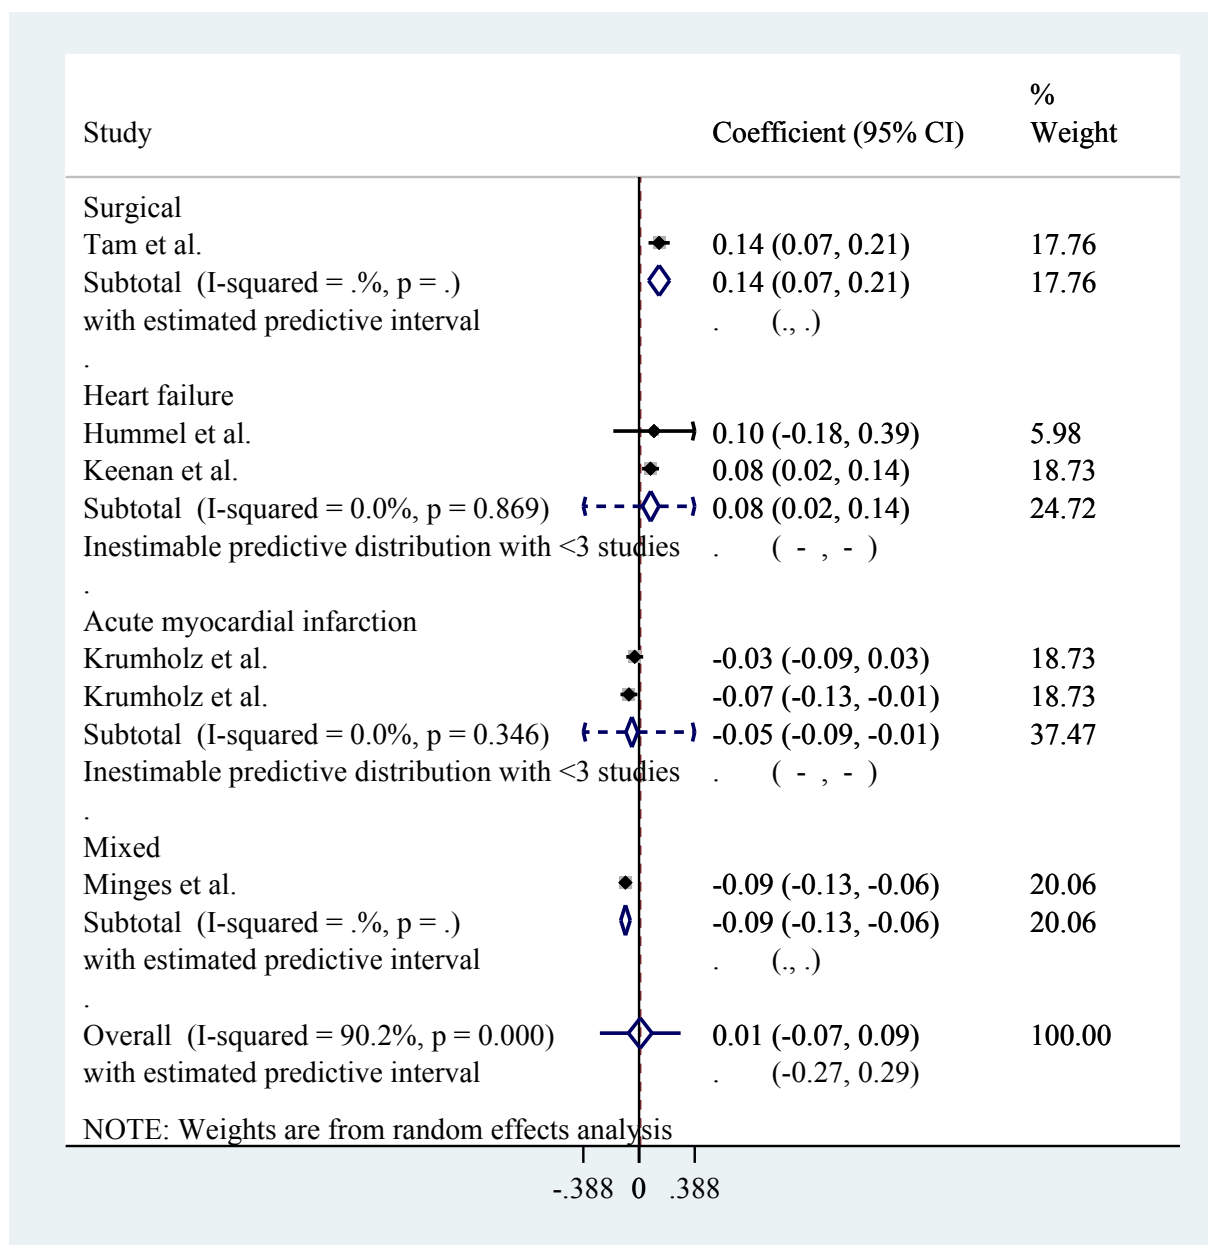

Legend: There was no missing data.

## Supplemental Figure 20. History of heart failure as predictor

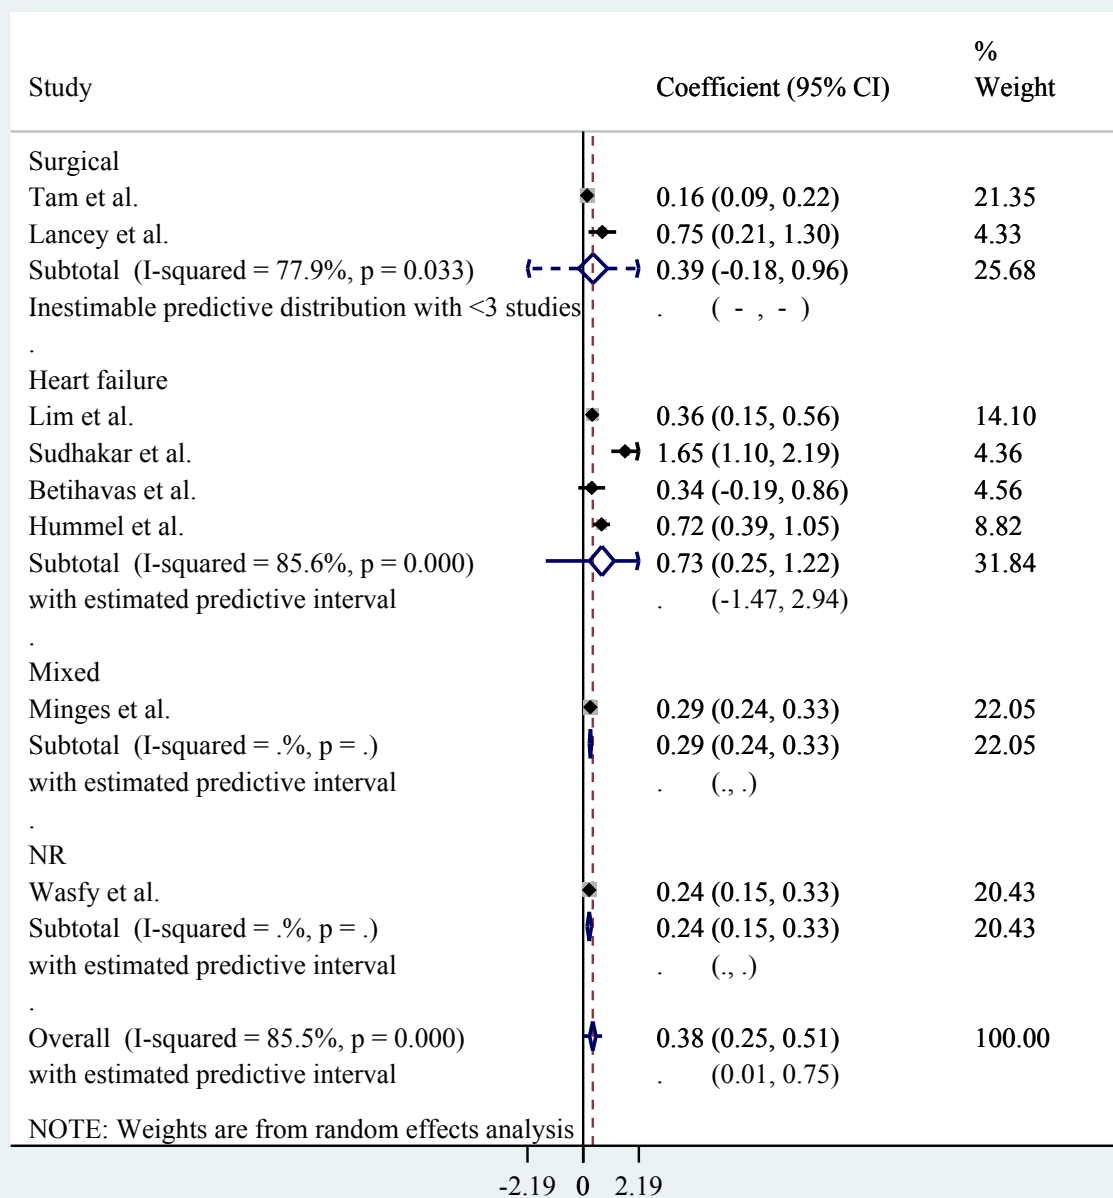

Legend: There was no missing data.

**Supplemental Figure 21. Cerebrovascular disease as predictor**

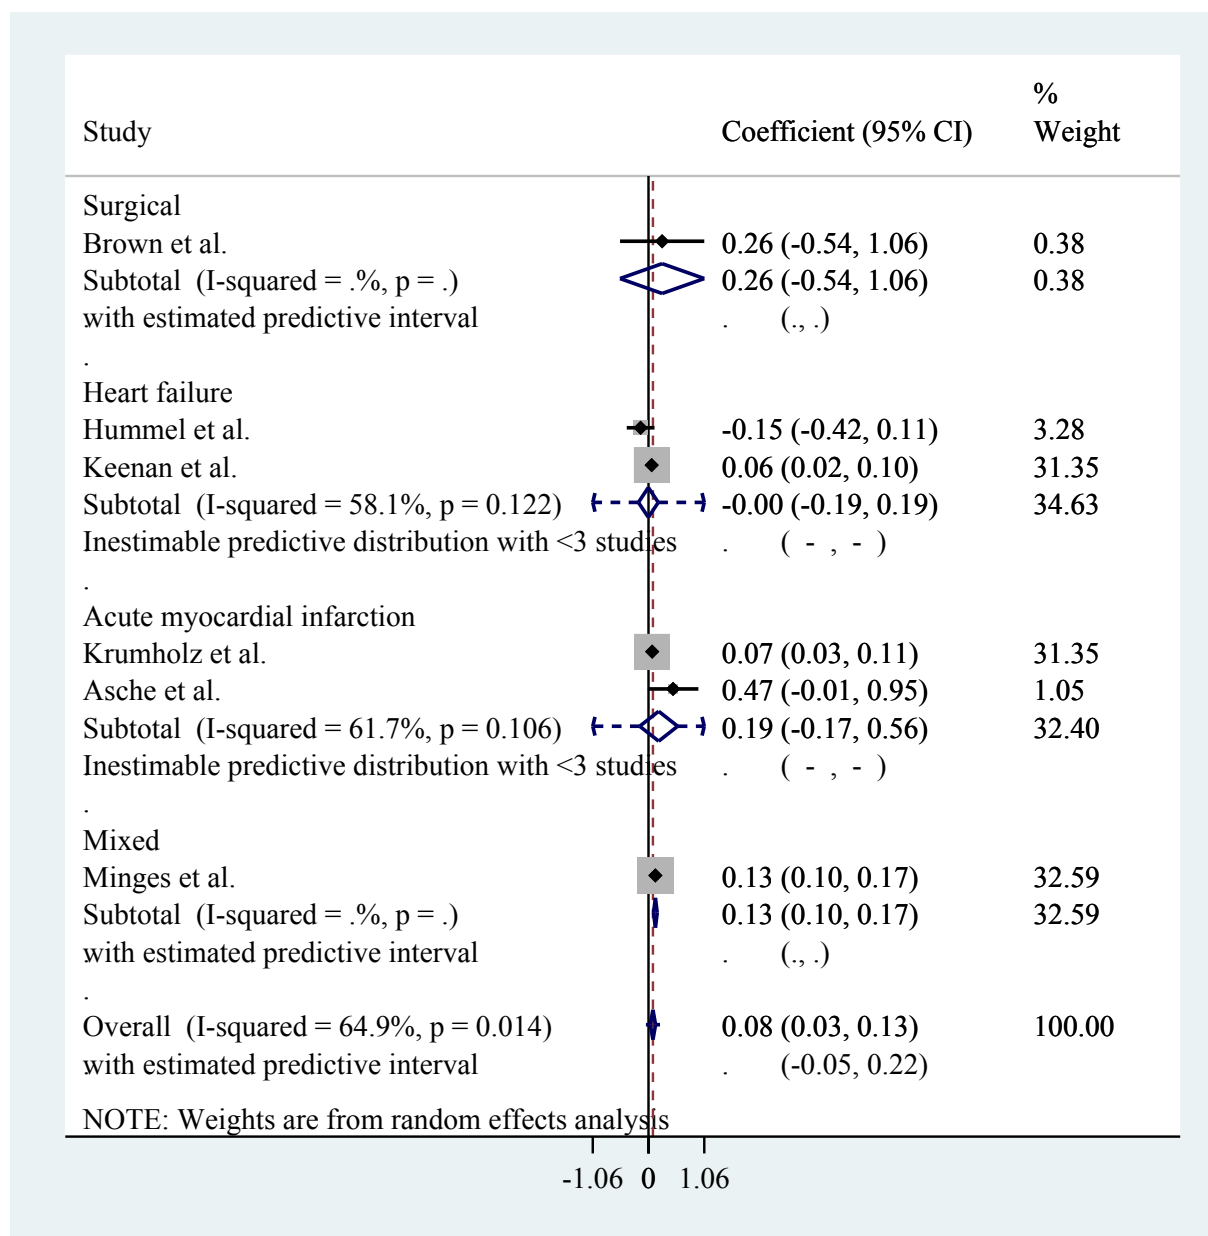

Legend: there was no missing data.

## Supplemental Figure 22. Anemia as predictor

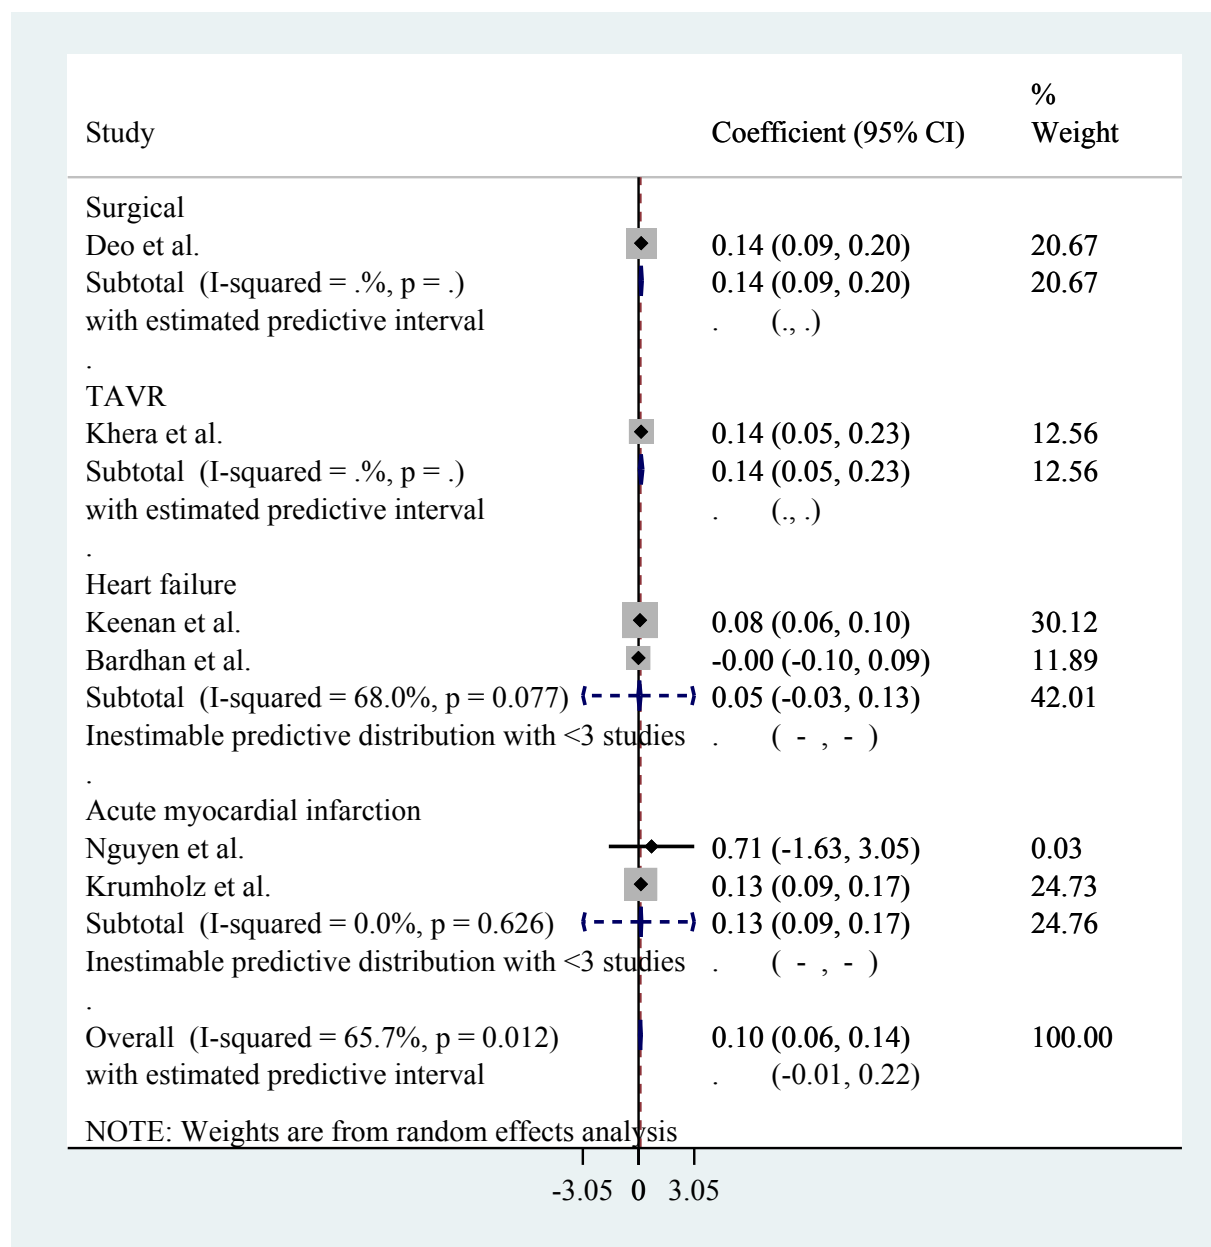

Legend: There was no missing data.

**Supplemental Figure 23. Stroke as predictor**

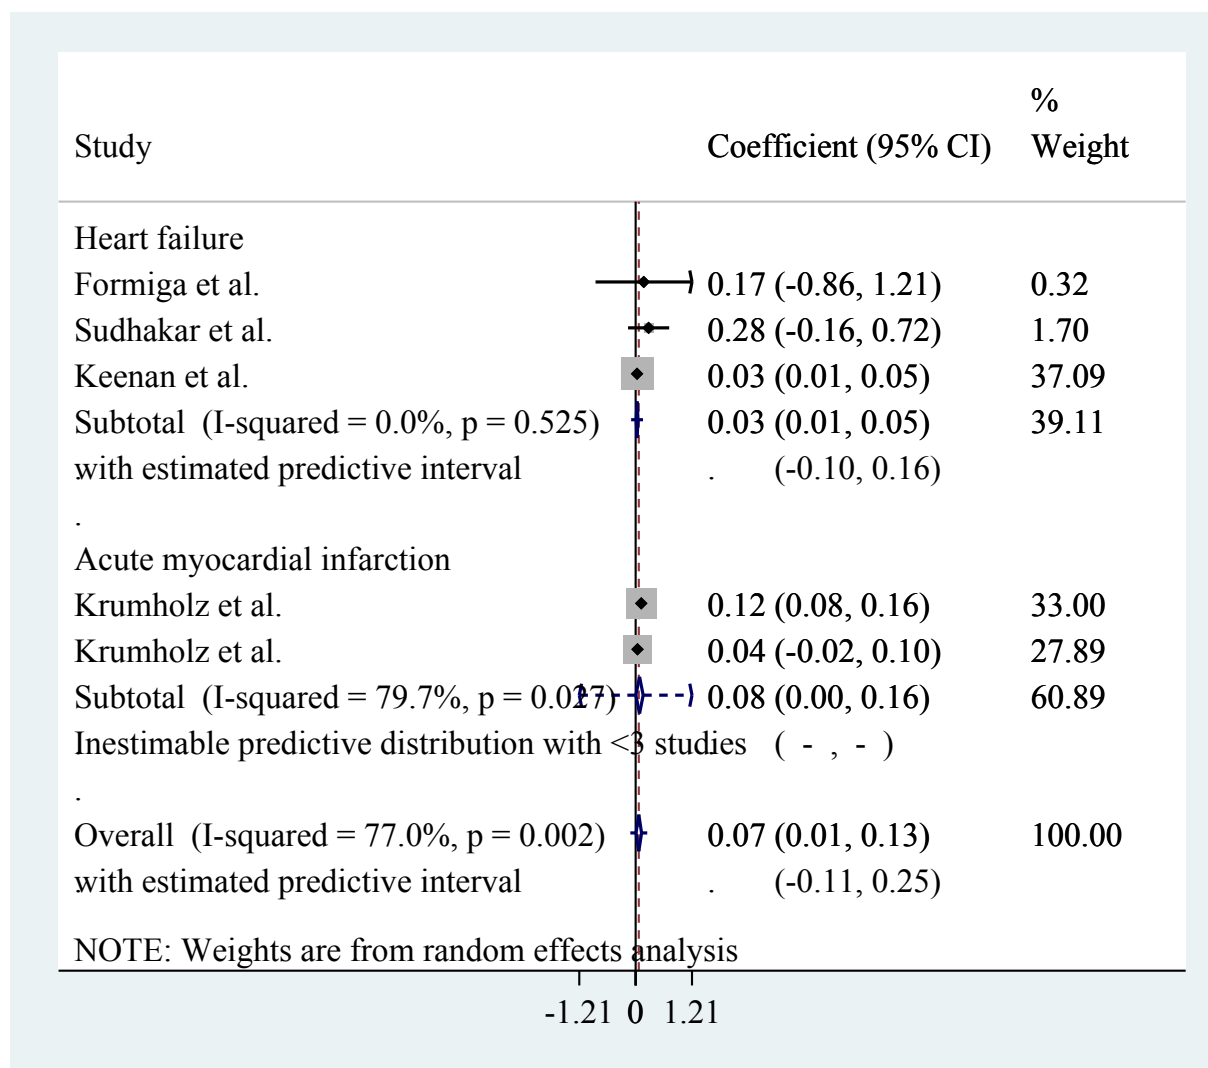

Legend: There was no missing data.



**Supplemental Figure 24. Peripheral vascular disease as predictor**

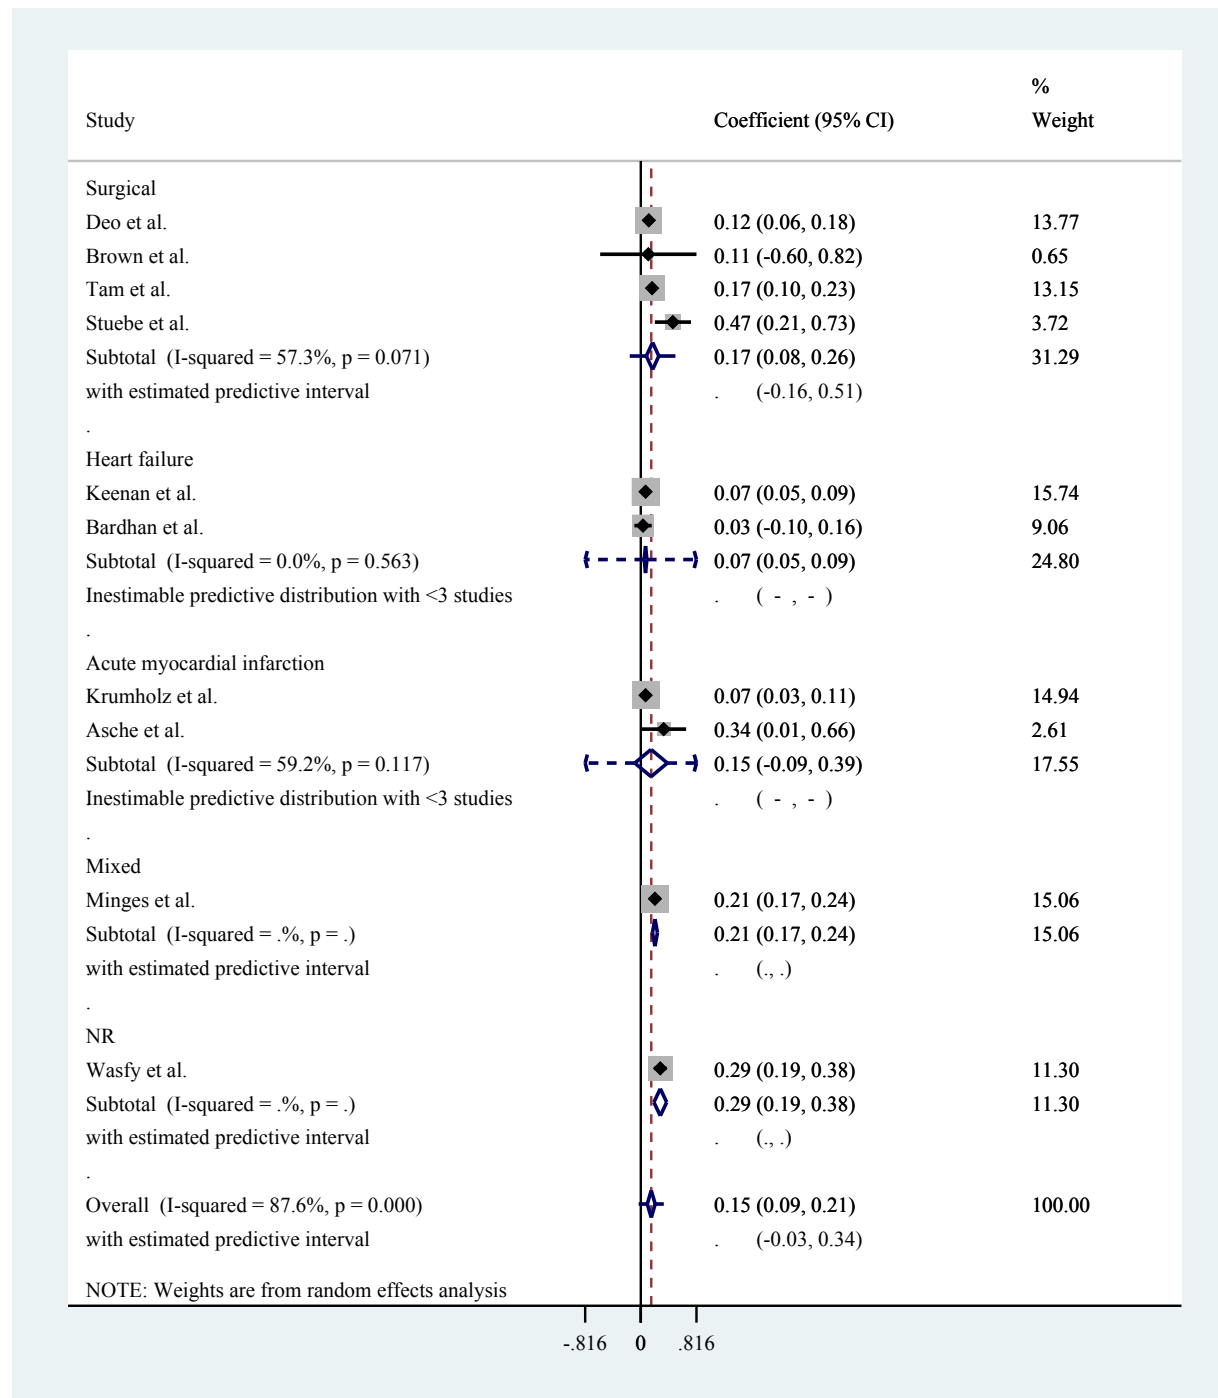

Legend: There was no missing data.

Supplemental Figure 25. Dementia as predictor

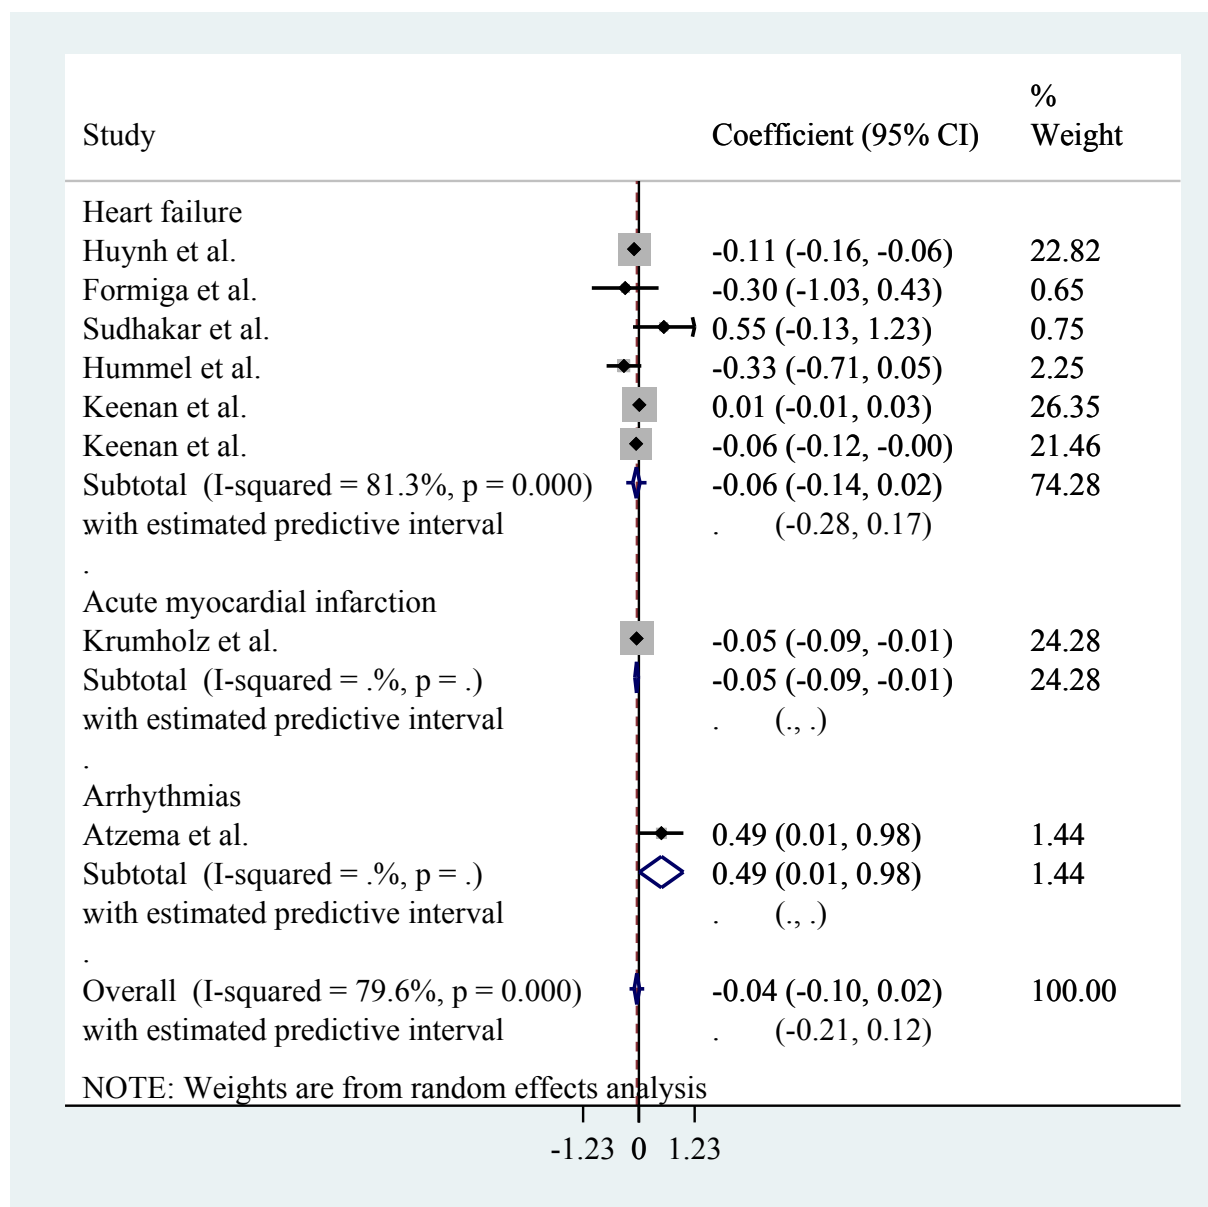

Legend: There was no missing data.

## Supplemental Figure 26. Prior Coronary Artery Bypass Graft as predictor

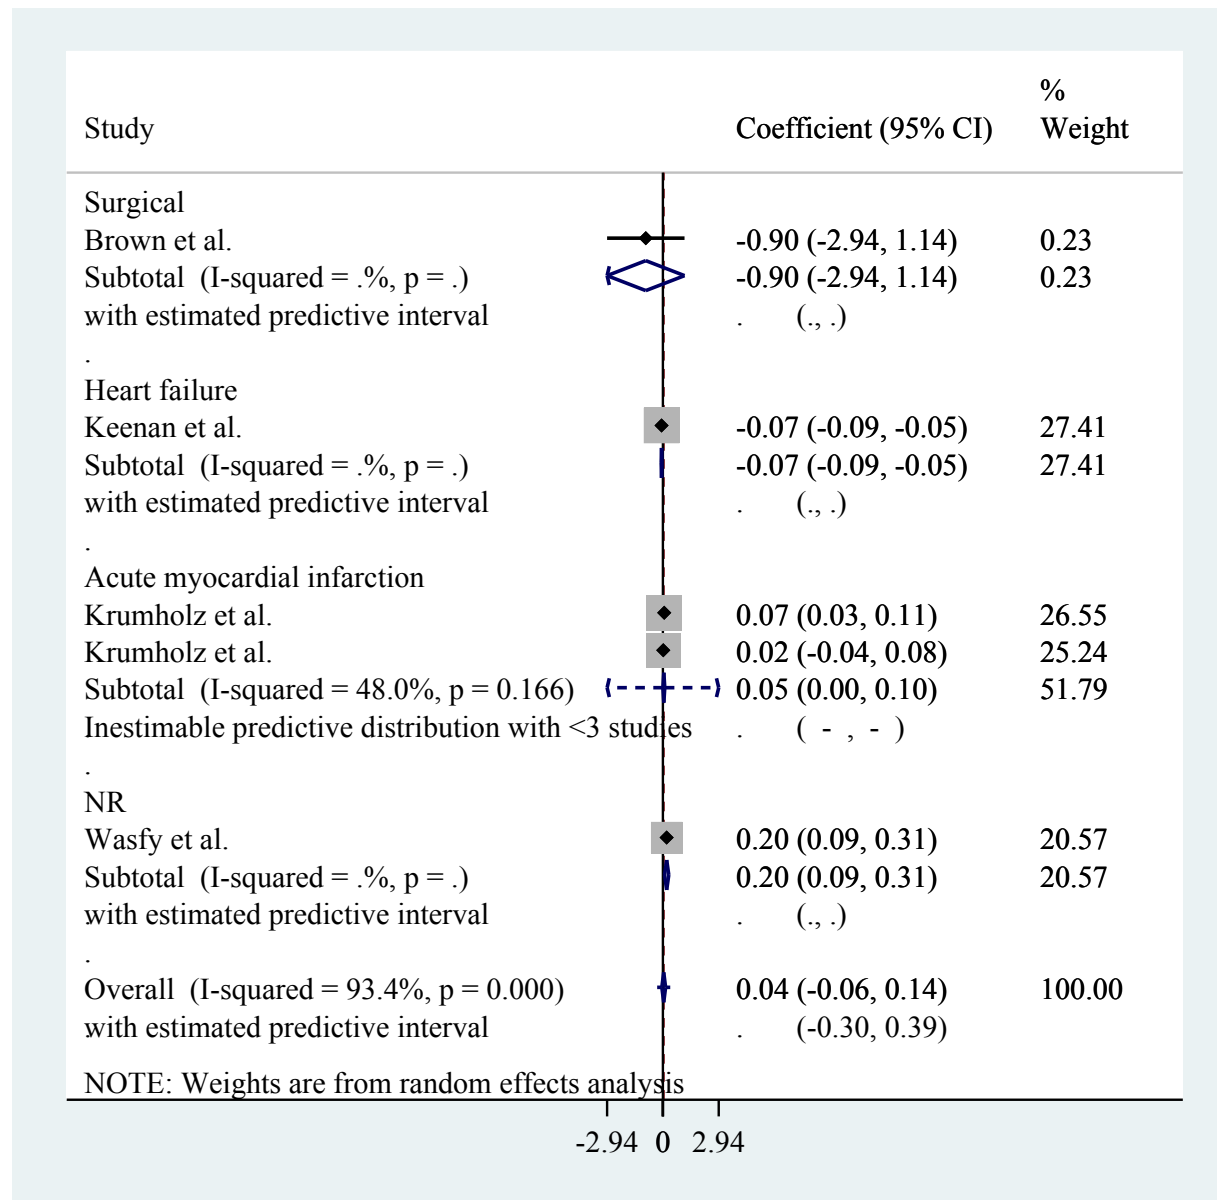

Legend: There was no missing data.

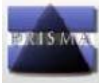

# PRISMA 2009 Checklist

1  
2  
3  
4  
5  
6  
7  
8  
9  
10  
11  
12  
13  
14  
15  
16  
17  
18  
19  
20  
21  
22  
23  
24  
25  
26  
27  
28  
29  
30  
31  
32  
33  
34  
35  
36  
37  
38  
39  
40  
41  
42  
43  
44  
45  
46  
47

| Section/topic                      | #  | Checklist item                                                                                                                                                                                                                                                                                              | Reported on page #    |
|------------------------------------|----|-------------------------------------------------------------------------------------------------------------------------------------------------------------------------------------------------------------------------------------------------------------------------------------------------------------|-----------------------|
| <b>TITLE</b>                       |    |                                                                                                                                                                                                                                                                                                             |                       |
| Title                              | 1  | Identify the report as a systematic review, meta-analysis, or both.                                                                                                                                                                                                                                         | 1                     |
| <b>ABSTRACT</b>                    |    |                                                                                                                                                                                                                                                                                                             |                       |
| Structured summary                 | 2  | Provide a structured summary including, as applicable: background; objectives; data sources; study eligibility criteria, participants, and interventions; study appraisal and synthesis methods; results; limitations; conclusions and implications of key findings; systematic review registration number. | 2                     |
| <b>INTRODUCTION</b>                |    |                                                                                                                                                                                                                                                                                                             |                       |
| Rationale                          | 3  | Describe the rationale for the review in the context of what is already known.                                                                                                                                                                                                                              | 5                     |
| Objectives                         | 4  | Provide an explicit statement of questions being addressed with reference to participants, interventions, comparisons, outcomes, and study design (PICOS).                                                                                                                                                  | 6                     |
| <b>METHODS</b>                     |    |                                                                                                                                                                                                                                                                                                             |                       |
| Protocol and registration          | 5  | Indicate if a review protocol exists, if and where it can be accessed (e.g., Web address), and, if available, provide registration information including registration number.                                                                                                                               | 7                     |
| Eligibility criteria               | 6  | Specify study characteristics (e.g., PICOS, length of follow-up) and report characteristics (e.g., years considered, language, publication status) used as criteria for eligibility, giving rationale.                                                                                                      | 7                     |
| Information sources                | 7  | Describe all information sources (e.g., databases with dates of coverage, contact with study authors to identify additional studies) in the search and date last searched.                                                                                                                                  | 7                     |
| Search                             | 8  | Present full electronic search strategy for at least one database, including any limits used, such that it could be repeated.                                                                                                                                                                               | 7,<br>Supp.<br>Text 1 |
| Study selection                    | 9  | State the process for selecting studies (i.e., screening, eligibility, included in systematic review, and, if applicable, included in the meta-analysis).                                                                                                                                                   | 7,8                   |
| Data collection process            | 10 | Describe method of data extraction from reports (e.g., piloted forms, independently, in duplicate) and any processes for obtaining and confirming data from investigators.                                                                                                                                  | 8                     |
| Data items                         | 11 | List and define all variables for which data were sought (e.g., PICOS, funding sources) and any assumptions and simplifications made.                                                                                                                                                                       | 8,<br>Supp<br>Text 2  |
| Risk of bias in individual studies | 12 | Describe methods used for assessing risk of bias of individual studies (including specification of whether this was done at the study or outcome level), and how this information is to be used in any data synthesis.                                                                                      | 8                     |

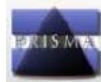

# PRISMA 2009 Checklist

|                      |    |                                                                                                                                                           |   |
|----------------------|----|-----------------------------------------------------------------------------------------------------------------------------------------------------------|---|
| Summary measures     | 13 | State the principal summary measures (e.g., risk ratio, difference in means).                                                                             | 8 |
| Synthesis of results | 14 | Describe the methods of handling data and combining results of studies, if done, including measures of consistency (e.g., $I^2$ ) for each meta-analysis. | 9 |

Page 1 of 2

| Section/topic                 | #  | Checklist item                                                                                                                                                                                           | Reported on page #                            |
|-------------------------------|----|----------------------------------------------------------------------------------------------------------------------------------------------------------------------------------------------------------|-----------------------------------------------|
| Risk of bias across studies   | 15 | Specify any assessment of risk of bias that may affect the cumulative evidence (e.g., publication bias, selective reporting within studies).                                                             | NA                                            |
| Additional analyses           | 16 | Describe methods of additional analyses (e.g., sensitivity or subgroup analyses, meta-regression), if done, indicating which were pre-specified.                                                         | 9                                             |
| <b>RESULTS</b>                |    |                                                                                                                                                                                                          |                                               |
| Study selection               | 17 | Give numbers of studies screened, assessed for eligibility, and included in the review, with reasons for exclusions at each stage, ideally with a flow diagram.                                          | 10, Fig 1                                     |
| Study characteristics         | 18 | For each study, present characteristics for which data were extracted (e.g., study size, PICOS, follow-up period) and provide the citations.                                                             | 10-18, Table 1                                |
| Risk of bias within studies   | 19 | Present data on risk of bias of each study and, if available, any outcome level assessment (see item 12).                                                                                                | 19, Fig 2, Supp. Table 1                      |
| Results of individual studies | 20 | For all outcomes considered (benefits or harms), present, for each study: (a) simple summary data for each intervention group (b) effect estimates and confidence intervals, ideally with a forest plot. | 19-29, Table 2                                |
| Synthesis of results          | 21 | Present results of each meta-analysis done, including confidence intervals and measures of consistency.                                                                                                  | 20, Fig 3 and 4, Supp. Table 3, Supp. Fig 1-6 |
| Risk of bias across studies   | 22 | Present results of any assessment of risk of bias across studies (see Item 15).                                                                                                                          | NA                                            |
| Additional analysis           | 23 | Give results of additional analyses, if done (e.g., sensitivity or subgroup analyses, meta-regression [see Item 16]).                                                                                    | 19, 20, 29<br>Supp. Table 2, Supp. Fig        |

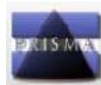

# PRISMA 2009 Checklist

1  
2  
3  
4  
5  
6  
7  
8  
9  
10  
11  
12  
13  
14  
15  
16  
17  
18  
19  
20  
21  
22  
23  
24  
25  
26  
27  
28  
29  
30  
31  
32  
33  
34  
35  
36  
37  
38  
39  
40  
41  
42  
43  
44  
45  
46  
47

|                     |    |                                                                                                                                                                                      |        |
|---------------------|----|--------------------------------------------------------------------------------------------------------------------------------------------------------------------------------------|--------|
|                     |    |                                                                                                                                                                                      | 7-26   |
| <b>DISCUSSION</b>   |    |                                                                                                                                                                                      |        |
| Summary of evidence | 24 | Summarize the main findings including the strength of evidence for each main outcome; consider their relevance to key groups (e.g., healthcare providers, users, and policy makers). | 30-32  |
| Limitations         | 25 | Discuss limitations at study and outcome level (e.g., risk of bias), and at review-level (e.g., incomplete retrieval of identified research, reporting bias).                        | 32, 33 |
| Conclusions         | 26 | Provide a general interpretation of the results in the context of other evidence, and implications for future research.                                                              | 33     |
| <b>FUNDING</b>      |    |                                                                                                                                                                                      |        |
| Funding             | 27 | Describe sources of funding for the systematic review and other support (e.g., supply of data); role of funders for the systematic review.                                           | 134    |

From: Moher D, Liberati A, Tetzlaff J, Altman DG, The PRISMA Group (2009). Preferred Reporting Items for Systematic Reviews and Meta-Analyses: The PRISMA Statement. PLoS Med 6(6): e1000097. doi:10.1371/journal.pmed1000097

For more information, visit: [www.prisma-statement.org](http://www.prisma-statement.org).

Page 2 of 2

# BMJ Open

## Prediction models for hospital readmissions in patients with heart disease: a systematic review and meta-analysis

|                                 |                                                                                                                                                                                                                                                                                                                                                                                                                                                                                                                                                                                                                                                                                                                                                                                                                                                                                                                                                                                                   |
|---------------------------------|---------------------------------------------------------------------------------------------------------------------------------------------------------------------------------------------------------------------------------------------------------------------------------------------------------------------------------------------------------------------------------------------------------------------------------------------------------------------------------------------------------------------------------------------------------------------------------------------------------------------------------------------------------------------------------------------------------------------------------------------------------------------------------------------------------------------------------------------------------------------------------------------------------------------------------------------------------------------------------------------------|
| Journal:                        | <i>BMJ Open</i>                                                                                                                                                                                                                                                                                                                                                                                                                                                                                                                                                                                                                                                                                                                                                                                                                                                                                                                                                                                   |
| Manuscript ID                   | bmjopen-2020-047576.R1                                                                                                                                                                                                                                                                                                                                                                                                                                                                                                                                                                                                                                                                                                                                                                                                                                                                                                                                                                            |
| Article Type:                   | Original research                                                                                                                                                                                                                                                                                                                                                                                                                                                                                                                                                                                                                                                                                                                                                                                                                                                                                                                                                                                 |
| Date Submitted by the Author:   | 12-Jul-2021                                                                                                                                                                                                                                                                                                                                                                                                                                                                                                                                                                                                                                                                                                                                                                                                                                                                                                                                                                                       |
| Complete List of Authors:       | Van Grootven, Bastiaan; Katholieke Universiteit Leuven, Department of Public Health and Primary Care; Research Foundation Flanders<br>Jepma, Patricia; Amsterdam UMC Locatie AMC, ; Amsterdam University of Applied Sciences,<br>Rijpkema, Corinne; Vrije Universiteit Amsterdam<br>Verweij, Lotte; Amsterdam University of Applied Sciences,<br>Leeflang, Mariska; Amsterdam UMC Locatie AMC<br>Daams, Joost; Amsterdam UMC Location AMC, Medical Library<br>Deschodt, Mieke; KU Leuven – University of Leuven, Department of Public Health and primary care ; University of Basel, Department of Public Health<br>Milisen, Koen; KU Leuven – University of Leuven, Department of Public Health and Primary Care; University Hospitals Leuven, Department of Geriatric Medicine<br>Flamaing, Johan; University Hospitals Leuven, Department of Public health and primary care ; KU Leuven – University of Leuven, Department of Geriatric Medicine<br>Buurman, Bianca; Amsterdam UMC Locatie AMC |
| <b>Primary Subject Heading</b>: | Cardiovascular medicine                                                                                                                                                                                                                                                                                                                                                                                                                                                                                                                                                                                                                                                                                                                                                                                                                                                                                                                                                                           |
| Secondary Subject Heading:      | Research methods                                                                                                                                                                                                                                                                                                                                                                                                                                                                                                                                                                                                                                                                                                                                                                                                                                                                                                                                                                                  |
| Keywords:                       | CARDIOLOGY, Adverse events < THERAPEUTICS, Risk management < HEALTH SERVICES ADMINISTRATION & MANAGEMENT                                                                                                                                                                                                                                                                                                                                                                                                                                                                                                                                                                                                                                                                                                                                                                                                                                                                                          |
|                                 |                                                                                                                                                                                                                                                                                                                                                                                                                                                                                                                                                                                                                                                                                                                                                                                                                                                                                                                                                                                                   |

SCHOLARONE™  
Manuscripts

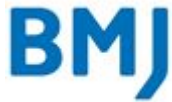

I, the Submitting Author has the right to grant and does grant on behalf of all authors of the Work (as defined in the below author licence), an exclusive licence and/or a non-exclusive licence for contributions from authors who are: i) UK Crown employees; ii) where BMJ has agreed a CC-BY licence shall apply, and/or iii) in accordance with the terms applicable for US Federal Government officers or employees acting as part of their official duties; on a worldwide, perpetual, irrevocable, royalty-free basis to BMJ Publishing Group Ltd ("BMJ") its licensees and where the relevant Journal is co-owned by BMJ to the co-owners of the Journal, to publish the Work in this journal and any other BMJ products and to exploit all rights, as set out in our [licence](#).

The Submitting Author accepts and understands that any supply made under these terms is made by BMJ to the Submitting Author unless you are acting as an employee on behalf of your employer or a postgraduate student of an affiliated institution which is paying any applicable article publishing charge ("APC") for Open Access articles. Where the Submitting Author wishes to make the Work available on an Open Access basis (and intends to pay the relevant APC), the terms of reuse of such Open Access shall be governed by a Creative Commons licence – details of these licences and which [Creative Commons](#) licence will apply to this Work are set out in our licence referred to above.

Other than as permitted in any relevant BMJ Author's Self Archiving Policies, I confirm this Work has not been accepted for publication elsewhere, is not being considered for publication elsewhere and does not duplicate material already published. I confirm all authors consent to publication of this Work and authorise the granting of this licence.



# Prediction models for hospital readmissions in patients with heart disease: a systematic review and meta-analysis.

Bastiaan van Grootven\* RN, PhD<sup>a,b</sup>, Patricia Jepma\* RN, MSc<sup>c</sup>, Corinne Rijpkema MSc<sup>d</sup>, Lotte Verweij RN, MSc<sup>c</sup>, Mariska Leeftang PhD<sup>e</sup>, Joost Daams MA<sup>f</sup>, Mieke Deschodt RN, PhD<sup>b,g,h</sup>, Koen Milisen RN, PhD<sup>b,i</sup>, Johan Flamaing MD, PhD<sup>b,i</sup>, Bianca Buurman RN, PhD<sup>e,j</sup>.

\* Joint first authors

<sup>a</sup> Research Foundation Flanders, Brussels, Belgium;

<sup>b</sup> KU Leuven, Department of Public Health and Primary Care, Leuven, Belgium.

<sup>c</sup> Center of Expertise Urban Vitality, Faculty of Health, Amsterdam University of Applied Sciences, Amsterdam, the Netherlands.

<sup>d</sup> Vrije Universiteit, Faculty of Science, Amsterdam, the Netherlands.

<sup>e</sup> Amsterdam UMC, Department of Clinical Epidemiology, Biostatistics and Bioinformatics, Amsterdam, the Netherlands.

<sup>f</sup> Amsterdam UMC, Research support, Amsterdam, the Netherlands.

<sup>g</sup> University of Hasselt, Department of Healthcare and Ethics. Faculty of Medicine and Life Sciences, Hasselt, Belgium.

<sup>h</sup> University of Basel, Department of Public Health, Basel, Switzerland.

<sup>i</sup> University Hospital Leuven, Department of Geriatric Medicine, Leuven, Belgium.

<sup>j</sup> Amsterdam UMC, Department of Internal Medicine, section of Geriatric Medicine. Amsterdam, the Netherlands.

## Corresponding author

Bastiaan van Grootven

KU Leuven, Department of Public Health and Primary Care

Kapucijnenvoer 35 D – box 7002

3000 Leuven

E-mail: [bastiaan.vangrootven@kuleuven.be](mailto:bastiaan.vangrootven@kuleuven.be)

Word count: 3370 words

## Abstract

**Objective:** To describe the discrimination and calibration of clinical prediction models, identify characteristics that contribute to better predictions, and investigate predictors that are associated with unplanned hospital readmissions.

**Design:** Systematic review and meta-analysis.

**Data source:** Medline, EMBASE, ICTPR (for study protocols), and Web of Science (for conference proceedings) were searched up to 25 August 2020.

**Eligibility criteria for selecting studies:** Studies were eligible if they reported on 1) hospitalized adult patients with acute heart disease; 2) a clinical presentation of prediction models with c-statistic; 3) unplanned hospital readmission within six months.

**Primary and secondary outcome measures:** Model discrimination for unplanned hospital readmission within six months measured using concordance (c) statistics and model calibration. Meta-regression and sub-group analyses were performed to investigate predefined sources of heterogeneity. Outcome measures from models reported in multiple independent cohorts and similarly defined risk predictors were pooled.

**Results:** Sixty studies describing 81 models were included: 43 models were newly developed, and 38 were externally validated. Included populations were mainly heart failure (HF) patients (n=29). The average age ranged between 56.5 and 84 years. The incidence of readmission ranged from 3% till 43%. Risk of bias was high in almost all studies. The c-statistic was <0.7 in 72 models, between 0.7-0.8 in 16 models and >0.8 in 5 models. The study population, data source and number of predictors were significant moderators for the discrimination. Calibration was reported for 27 models. Only the GRACE-score had adequate discrimination in independent cohorts (0.78, 95% CI 0.63-0.86). Eighteen predictors were pooled.

1  
2  
3 **Conclusion:** Some promising models require updating and validation before use in clinical  
4  
5 practice. The lack of independent validation studies, high risk of bias and low consistency in  
6  
7 measured predictors limit their applicability.  
8  
9

10  
11 **Trial registration:** Prospero, CRD42020159839  
12  
13  
14  
15  
16  
17  
18  
19

20 **Key words:** heart disease, meta-analysis, patient readmission, risk assessment, systematic  
21  
22 review.  
23  
24  
25  
26  
27  
28  
29  
30  
31  
32  
33  
34  
35  
36  
37  
38  
39  
40  
41  
42  
43  
44  
45  
46  
47  
48  
49  
50  
51  
52  
53  
54  
55  
56  
57  
58  
59  
60

## Article summary

### Strengths and limitations of this study

- Largest investigation of unplanned hospital readmission risk to date, including 81 unique prediction models in the systematic review.
- Independent and standardized procedures for study selection, data collection and risk of bias assessment.
- High risk of bias in current prediction models and unexplained heterogeneity between models limit recommendations for using prediction model in clinical practice.

## Introduction

Hospital readmissions in patients with acute heart disease are associated with a high burden on patients, healthcare and costs.<sup>1</sup> The identification of high-risk hospitalized patients is important to provide timely interventions. Prediction models guide healthcare providers in daily practice to assess patients' probability of readmission within a certain time frame and include candidate variables identified by clinical perspectives, literature or data-driven approaches, e.g. using machine learning techniques.<sup>2</sup> Data are often collected from observational cohorts of intervention studies and subsequently analyzed to examine what set of predictors best predict the risk of readmission. The clinical applicability of risk prediction models in daily practice is currently limited. Statistical models are often not presented in a clinically useful way or models based on administrative data are considered.<sup>3</sup> These models therefore cannot be readily used in daily practice. In addition, prediction models are often developed for a very specific population, which asks from clinicians to be familiar with several models. Furthermore, patients may belong to multiple populations because of cardiac comorbidities. Numerous systematic reviews have previously investigated the prediction of unplanned hospital readmissions in several populations.<sup>3-12</sup> While some have included hospitalized patients in general<sup>11,12</sup>, others have focused specifically on patients with heart failure (HF)<sup>4-8,10</sup> or acute myocardial infarction (AMI).<sup>3,9</sup> The conclusion is generally the same, the discrimination is poor to adequate, and there is little consistency in the type of predictors included in the models.

We believe that the state of the art on risk prediction can be improved if more knowledge is available on the performance of clinical risk prediction models and risk predictors across different populations of patients with heart disease. Although heterogeneity in models and predictors is often considered as a limitation, it can inform effect moderators on how predictions can be improved.<sup>13</sup> For example, perhaps we can identify predictors who demonstrate a consistent association with hospital readmission regardless of the underlying

1  
2  
3 disease. If this can be identified, a more general prediction model could be developed that is  
4 relevant for the heterogeneous group of patients on cardiac care units. This might contribute to  
5 the early recognition and onset of preventive interventions in patients with heart disease at risk  
6 of readmission.  
7  
8  
9  
10  
11

12 We therefore performed a systematic review and meta-analysis on clinical risk prediction  
13 models for the outcome unplanned hospital readmission in patients hospitalized for acute heart  
14 disease. Our aim was to describe the discrimination and calibration of clinical prediction  
15 models, identify characteristics that contribute to better predictions, and to investigate  
16 predictors that are consistently associated with hospital readmissions.  
17  
18  
19  
20  
21  
22  
23  
24  
25  
26  
27  
28  
29  
30  
31  
32  
33  
34  
35  
36  
37  
38  
39  
40  
41  
42  
43  
44  
45  
46  
47  
48  
49  
50  
51  
52  
53  
54  
55  
56  
57  
58  
59  
60

## Methods

A protocol was registered in PROSPERO (CRD42020159839). The results are reported following the PRISMA (Preferred Reporting Items for Systematic Reviews and Meta-Analyses) statement.<sup>14</sup>

### Eligibility criteria

Studies were eligible if 1) the study population included hospitalized adult patients with (symptoms of) heart disease; 2) a prediction model with c-statistic was reported; 3) a clinically useful presentation of the model with risk factors was reported; 4) the outcome was unplanned hospital readmissions within six months; 5) the study design was appropriate, i.e. (nested) case-control study, (prospective and retrospective) cohort study, database and registry study, or secondary analysis of a trial; 6) they were reported in English.

### Information sources

A search strategy was designed with an information specialist (PROSPERO protocol and Supplemental Text 1). We searched the Medline, EMBASE, WHO ICTPR search portal (for study protocols), and Web of Science (for conference proceedings) databases up to 25 August 2020 without any restrictions for eligible studies. We searched for full text manuscripts of the identified protocols. After selecting the full text manuscripts, we screened references lists and prospective citations (using Google Scholar) for additional eligible studies.

### Study selection

Three reviewers were involved in the study selection process. Each reviewer independently screened two thirds of the titles, abstracts and full-text articles of potentially relevant references identified in the literature search. Disagreements were resolved through consensus. Sixteen authors were contacted and six delivered data for readmission when a composite outcome was used. Two authors were also contacted when data was reported combining multiple patient

1  
2  
3 populations. However, no additional data was provided for the population with heart disease  
4  
5 and these studies were excluded.  
6  
7

### 8 **Data extraction**

9  
10  
11 Data extraction was performed based on the ‘Critical Appraisal and Data Extraction for  
12  
13 Systematic Reviews’ of prediction modelling studies checklist using standardized forms in the  
14  
15 Distiller Systematic Review Software (see Supplemental Text 2 for the data items).<sup>15</sup> The  
16  
17 checklist includes items on 11 relevant domains, including source of data, participants,  
18  
19 outcomes, candidate predictors, sample size, missing data, model development, model  
20  
21 performance, model evaluation, results, and interpretation. One reviewer collected the data and  
22  
23 the second reviewer verified the extracted data. Disagreements were resolved through  
24  
25 consensus. Eight authors were contacted and two delivered data to resolve uncertainties or  
26  
27 missing data.  
28  
29  
30

### 31 **Risk of bias**

32  
33  
34 The Prediction model Risk Of Bias ASsessment Tool (PROBAST) tool<sup>16</sup> was used to assess  
35  
36 the risk of bias (RoB) for four ‘quality’ domains, i.e. the participants, predictors, outcome and  
37  
38 analysis for each model. One author assessed the RoB as low, high or unclear, and the second  
39  
40 author verified the extracted data and RoB conclusion. Disagreements were resolved through  
41  
42 consensus. In addition, the applicability of the included studies based on our research question  
43  
44 was assessed for three domains, i.e. participants, predictors and outcome domains and rated as  
45  
46 low concerns, high concerns or uncertain concerns regarding applicability.  
47  
48  
49  
50

### 51 **Summary measures**

52  
53  
54 The discrimination of the prediction models were described using the concordance (c)-statistic.  
55  
56 Missing standard errors were derived from the sample data.<sup>17</sup> The calibration was described  
57  
58 using the number of observed and expected events, the calibration slope, calibration in large,  
59  
60



1  
2  
3 or the Hosmer-Lemeshow test. A definition of the commonly used measures is described in  
4  
5 box 1.  
6  
7

8 The association between risk predictors and hospital readmission was described using  
9  
10 regression coefficients. Missing standard errors for the coefficients were considered missing  
11  
12 completely at random and were not imputed. A complete case analysis was performed.  
13  
14  
15

### 16 **Synthesis of results and analyses**

17  
18  
19 Meta-analyses using random-effects models, with the Hartung-Knapp modification, were  
20  
21 performed to describe the distribution of the between-study variance of the different prediction  
22  
23 models and their predictors. Because we considered that there would be substantial  
24  
25 heterogeneity, conclusions were not based on the precision of the pooled estimates.  
26  
27

28 The c-statistic from each model was pooled and a meta-regression was performed to investigate  
29  
30 the moderation effect of age and the number of predictors on the discrimination. A subgroup  
31  
32 analysis was performed to investigate the moderation effect of the different patient populations,  
33  
34 design, outcome definition, and endpoint. The c-statistic of the validated model was used if  
35  
36 available; otherwise the c-statistic from the development phase was used.  
37  
38

39 The c-statistics of specific prediction models that were evaluated in multiple studies were  
40  
41 pooled for the endpoint 30 days follow-up.  
42  
43

44 Coefficients of predictors that were similarly defined in at least five studies were pooled for  
45  
46 the endpoint 30 days follow-up. The patient populations were defined as subgroups to explore  
47  
48 consistency and heterogeneity ( $I^2$ , tau) in the effect estimates.  
49  
50

51 Analyses were performed using the 'metan' package in STATA 15 IC and the 'metamisc  
52  
53 package' in Rstudio.  
54  
55  
56  
57  
58  
59  
60

**Box 1. Definitions of commonly used measures**

**Discrimination:** Refers to the ability of a prediction model to discriminate between a patient with and without the outcome, e.g. readmission.

**C-statistic:** Is a measure of discrimination. For binary outcomes, the c-statistic is equivalent to the area under the curve: 1 indicates perfect discrimination, and 0.5 indicates that the model does not perform better than chance. Harrell's c-statistic is often used in survival models.

**Calibration:** Refers to the agreement between the predicted and the observed probability (or the outcome value for linear models). Calibration is expressed using different measures, e.g. calibration slope, calibration in large, Hosmer-Lemeshow test.

**Calibration slope:** The slope should be 1, a value  $< 1$  indicates extreme predictions, and a value of  $> 1$  indicates to moderate predictions.

**Calibration in large:** The value should be 0, a negative value indicates overestimation of the prediction, and a positive value indicates underestimation of the prediction.

**Hosmer-Lemeshow test:** This is a goodness-of-fit test for binary outcomes. A significant p-value, usually  $< 0.05$ , indicates poor goodness-of-fit.

**Derivation/development cohort:** A cohort of patients that is used to estimate the predictor values that are used in a prediction model to estimate a patient's probability for an outcome.

**Validation cohort:** A cohort of patients that is used to evaluate how well the developed model performs (in terms of discrimination and calibration).

**Internal validation:** Estimates how well the performance of a model will be reproduced in the target population. Several techniques can be used, e.g. random-split sample, cross-validation, and bootstrapping techniques.

**External validation:** Evaluates how well a model performs in a new sample, and can consist of temporal validation (sample contains more recently treated patients), geographical

1  
2  
3 validation (sample is from a different center) of a fully independent validation (validation by  
4 an independent team).  
5  
6  
7

### 8 9 10 **Public and patient involvement**

11  
12 Because of the design of the study and because we did not collect primary data, we did not  
13 involve patients or the public in the design, conduct, or reporting of our research.  
14  
15  
16  
17  
18  
19  
20  
21  
22  
23  
24  
25  
26  
27  
28  
29  
30  
31  
32  
33  
34  
35  
36  
37  
38  
39  
40  
41  
42  
43  
44  
45  
46  
47  
48  
49  
50  
51  
52  
53  
54  
55  
56  
57  
58  
59  
60

For peer review only

## Results

A total of 8588 abstracts were reviewed and 60 studies describing 81 separate models were included (Figure 1). Table 1 provides an overview of the included studies and models, which were published between 2001 and 2020. The majority of the studies (n=40) was performed in the United States. The data sources used were mostly retrospective cohort studies (n=15), hospital databases (n=13) and registries (n=13). Included populations were mainly HF patients (n=29), surgical patients (n=14) and patients with an AMI or acute coronary syndrome (n=10). The average age was between 56.5 and 84 years. The sample size of development cohorts ranged from 182 till 193,899 patients and of the validation cohorts between 104 and 321,088 patients. The outcome of interest was mostly all-cause readmission (n=41) and measured on 30 days (n=55). The incidence of readmission per study ranged from 3% till 43%.

**Table 1. Study characteristics**

| Study                           | Model                                    | Data source          | Development | Validation | Sample size |       | Population           | Average age              | Outcome | Readmission (%) |      |
|---------------------------------|------------------------------------------|----------------------|-------------|------------|-------------|-------|----------------------|--------------------------|---------|-----------------|------|
|                                 |                                          |                      |             |            | Dev.        | Val.  |                      |                          |         | Dev.            | Val. |
| Moretti et al. <sup>18</sup>    | EuroHeart PCI score                      | Hospital database    | NA          | Ext        | -           | 1192  | ACS                  | 71 (7)                   | 30d     |                 | 4.7  |
| Asche et al. <sup>19</sup>      | NR                                       | Retrospective cohort | Yes         | Split      | 2446        | 612   | AMI                  | 65 (15)                  | 30d     | 8.9             |      |
| Cediel et al. <sup>20</sup>     | TARRACO Risk Score                       | Retrospective cohort | Yes         | No         | 611         | 401   | AMI type 2, ischemia | D: 78 [17]<br>V: 60 [21] | 30d     |                 | 2.6  |
|                                 |                                          | Retrospective cohort | Yes         | No         | 611         | 401   | AMI type 2, ischemia | D: 78 [17]<br>V: 60 [21] | 180d    |                 | 7.9  |
| Chotechuan et al. <sup>21</sup> | GRACE                                    | Retrospective cohort | NA          | Ext        | -           | 152   | AMI                  | 60.5 (6.3)               | 30d     |                 | 5.3  |
|                                 | GRACE                                    | Retrospective cohort | NA          | Ext        | -           | 152   | AMI                  | 60.5 (6.3)               | 180d    |                 | 9.2  |
| Hilbert et al. <sup>22</sup>    | AMI decision tree                        | Registry             | Yes         | Ext        | 10848       | 10701 | AMI                  | NR                       | 30d     | 20.6            | 19.7 |
| Dodson et al. <sup>23</sup>     | SILVER-AMI 30-day readmission calculator | Prospective cohort   | Yes         | Split      | 2004        | 1002  | AMI                  | 81.5 (5.0)               | 30d     | 18.2            |      |
| Kini et al. <sup>24</sup>       | NR                                       | Registry             | Yes         | Split      | 60742       | 26107 | AMI                  | 76.5 (8.0)               | 90d     | 27.5            |      |
| Nguyen et al. <sup>25</sup>     | AMI READMITS score                       | Retrospective cohort | Yes         | Split      | 661         | 165   | AMI                  | 65.5 (12.8)              | 30d     |                 | 13   |
|                                 | Full-stay AMI model                      | Retrospective cohort | Yes         | Split      | 661         | 165   | AMI                  | 65.5 (12.8)              | 30d     |                 | 13   |
|                                 | CMS AMI administrative model             | Retrospective cohort | NA          | Ext        | -           | 826   | AMI                  | 65.5 (12.8)              | 30d     |                 | 13   |

Table 1. Study characteristics (continued)

| Study                          | Model                               | Data source          | Development | Validation | Sample size |                         | Population     | Average age                      | Outcome | Readmission (%) |                         |
|--------------------------------|-------------------------------------|----------------------|-------------|------------|-------------|-------------------------|----------------|----------------------------------|---------|-----------------|-------------------------|
|                                |                                     |                      |             |            | Dev.        | Val.                    |                |                                  |         | Dev.            | Val.                    |
| Krumholz et al. <sup>26</sup>  | CMS AMI administrative model        | Registry             | Yes         | Split, Ext | 100465      | 321088                  | AMI            | 78.7 (8.0)                       | 30d     | 18.9            | 20.0 (Ext) NR (split)   |
|                                | CMS AMI medical model               | Registry             | Yes         | Split      | 130944      | 130944                  | AMI            | 76.2 (7.3)                       | 30d     | 20              |                         |
| Rana et al. <sup>27</sup>      | Elixhauser index                    | Hospital database    | NA          | Ext        | -           | 1660                    | AMI            | 67.9                             | 30d     |                 | 6.3                     |
|                                | HOSPITAL score                      | Hospital database    | NA          | Ext        | -           | 1660                    | AMI            | 67.9                             | 30d     |                 | 6.3                     |
| Atzema et al. <sup>28</sup>    | AFTER Part 2 scoring system         | Retrospective cohort | Yes         | Split      | 2343        | 1167                    | Arrhythmia, AF | D: 68.6 (14.7)<br>V: 68.3 (15.1) | 30d     | 7               | 7.6                     |
| Lahewala et al. <sup>29</sup>  | CHADS2                              | Administrative       | NA          | Ext        | -           | 116450                  | Arrhythmia, AF | <75                              | 30d     |                 | 15.8                    |
|                                | CHADS2                              | Administrative       | NA          | Ext        | -           | 116450                  | Arrhythmia, AF | <75                              | 90d     |                 | 25.1                    |
|                                | CHA2DS-VASc                         | Administrative       | NA          | Ext        | -           | 116450                  | Arrhythmia, AF | 65-74                            | 30d     |                 | 15.8                    |
|                                | CHA2DS-VASc                         | Administrative       | NA          | Ext        | -           | 116450                  | Arrhythmia, AF | 65-74                            | 90d     |                 | 25.1                    |
| Benzillo et al. <sup>30</sup>  | CRSS                                | Hospital database    | Yes         | Boot, Ext  | 2589        | 896 (Ext)<br>500 (Boot) | CABG           | 66.7 (9.9)                       | 30d     | 9.1             | 8.2 (Ext)<br>9.1 (Boot) |
| Deo et al. <sup>31</sup>       | 30-days CABG Readmission Calculator | Administrative       | Yes         | Boot       | 155054      | 1000                    | CABG           | 65.4 (10.4)                      | 30d     | 12.5            |                         |
| Engoren et al. <sup>32</sup>   | NR                                  | Hospital database    | Yes         | Split      | 2644        | 2711                    | CABG           | NR                               | 30d     | 7.6             | 8                       |
| Lancey et al. <sup>33</sup>    | NR                                  | Registry             | Yes         | Split      | 2341        | 2520                    | CABG           | 64.5 (10.5)                      | 30d     | 8.8             | 9.5                     |
| Rosenblum et al. <sup>34</sup> | The STS PROM score                  | Hospital database    | NA          | Ext        | -           | 21719                   | CABG           | 63.5 (10.7)                      | 30d     |                 | 9.3                     |

**Table 1. Study characteristics (continued)**

| Study                                | Model                                            | Data source        | Development | Validation | Sample size |        | Population | Average age          | Outcome | Readmission (%) |      |
|--------------------------------------|--------------------------------------------------|--------------------|-------------|------------|-------------|--------|------------|----------------------|---------|-----------------|------|
|                                      |                                                  |                    |             |            | Dev.        | Val.   |            |                      |         | Dev.            | Val. |
| Zitser-Gurevich et al. <sup>35</sup> | NR                                               | Prospective cohort | Yes         | Split      | 2266,5      | 2266,5 | CABG       | 65-74                | 30d     | 13.3            |      |
|                                      | NR                                               | Prospective cohort | Yes         | Split      | 2266,5      | 2266,5 | CABG       | 65-74                | 100d    | 24.1            |      |
| Zywot et al. <sup>36</sup>           | CABG Risk Scale                                  | Administrative     | Yes         | Ext        | 126519      | 94318  | CABG       | D: 70-74<br>V: 70-74 | 30d     | 23              | 21   |
| Ahmad et al. <sup>37</sup>           | CMS HF administrative model                      | Prospective cohort | NA          | Ext        | -           | 183    | HF         | 61 [18]              | 30d     | 22.4            |      |
| Amarasingham et al. <sup>38</sup>    | ADHERE                                           | Hospital database  | NA          | Ext        | -           | 1372   | HF         | 56.5                 | 30d     | 24.1            |      |
|                                      | CMS HF administrative model                      | Hospital database  | NA          | Ext        | -           | 1372   | HF         | 56.5                 | 30d     | 24.1            |      |
|                                      | Tabak mortality score                            | Hospital database  | NA          | Ext        | -           | 1372   | HF         | 56.5                 | 30d     | 24.1            |      |
| Au et al. <sup>39</sup>              | Administrative Claims Model: HF 30-day mortality | Administrative     | NA          | Ext        | 59652       | 59652  | HF         | 75.8 (12.7)          | 30d     | 15.9            |      |
|                                      | Charlson Comorbidity Score                       | Administrative     | NA          | Ext        | 59652       | 59652  | HF         | 75.8 (12.7)          | 30d     | 15.9            |      |
|                                      | CMS HF administrative model                      | Administrative     | NA          | Ext        | 59652       | 59652  | HF         | 75.8 (12.7)          | 30d     | 15.9            |      |
|                                      | LACE                                             | Administrative     | NA          | Ext        | 59652       | 59652  | HF         | 75.8 (12.7)          | 30d     | 15.9            |      |
| Bardhan et al. <sup>40</sup>         | NR                                               | Hospital database  | Yes         | No         | 40983       | -      | HF         | 69.2 (15.7)          | 30d     | 7               |      |

**Table 1. Study characteristics (continued)**

| Study                          | Model                            | Data source            | Development | Validation | Sample size |       | Population | Average age  | Outcome | Readmission (%) |      |
|--------------------------------|----------------------------------|------------------------|-------------|------------|-------------|-------|------------|--------------|---------|-----------------|------|
|                                |                                  |                        |             |            | Dev.        | Val.  |            |              |         | Dev.            | Val. |
| Betihavas et al. <sup>41</sup> | NR                               | RCT secondary analysis | Yes         | Boot       | 280         | 200   | HF         | 74 [64 - 81] | 28d     |                 | 18   |
| Cox et al. <sup>42</sup>       | CMS HF administrative model      | Hospital database      | No          | Ext        | -           | 1454  | HF         | 75 (12)      | 30d     |                 | 21.5 |
|                                | CMS HF medical model             | Hospital database      | No          | Ext        | -           | 1454  | HF         | 75 (12)      | 30d     |                 | 21.5 |
| Delgado et al. <sup>43</sup>   | 15-day CV readmission risk score | Prospective cohort     | Yes         | Boot       | 1831        | 500   | HF         | 72.4 (12.1)  | 15d     |                 | 7.1  |
|                                | 30-day CV readmission risk score | Prospective cohort     | Yes         | Boot       | 1831        | 500   | HF         | 72.4 (12.1)  | 30d     |                 | 13.9 |
| Formiga et al. <sup>44</sup>   | CMS HF medical model             | Hospital database      | NA          | Ext        | -           | 719   | HF         | 78.1 (9)     | 30d     |                 | 7.6  |
|                                | CMS HF medical model             | Hospital database      | NA          | Ext        | -           | 719   | HF         | 78.1 (9)     | 90d     |                 | 14.4 |
| Frizzell et al. <sup>45</sup>  | CMS HF administrative model      | Registry               | NA          | External   | -           | 56477 | HF         | 80 [2]       | 30d     |                 | 21.2 |
| Hammill et al. <sup>46</sup>   | CMS HF administrative model      | Registry               | NA          | Ext        | -           | 24163 | HF         | 81           | 30d     |                 | 21.9 |
| Hilbert et al. <sup>22</sup>   | HF decision tree                 | Registry               | Yes         | Ext        | 39682       | 38409 | HF         | NR           | 30d     |                 | 25.5 |
| Hummel et al. <sup>47</sup>    | CMS HF medical model             | Prospective cohort     | NA          | Ext        | -           | 1807  | HF         | 79.8 (7.6)   | 30d     |                 | 27   |



**Table 1. Study characteristics (continued)**

| Study                         | Model                            | Data source          | Development | Validation  | Sample size |        | Population | Average age                      | Outcome | Readmission (%)       |                          |
|-------------------------------|----------------------------------|----------------------|-------------|-------------|-------------|--------|------------|----------------------------------|---------|-----------------------|--------------------------|
|                               |                                  |                      |             |             | Dev.        | Val.   |            |                                  |         | Dev.                  | Val.                     |
| Huynh et al. <sup>48</sup>    | NR                               | Prospective cohort   | Yes         | Ext         | 430         | 1046   | HF         | D: 75 [19]<br>V: 67 [17]         | 30d     | 21                    | 24                       |
|                               | NR                               | Prospective cohort   | Yes         | Ext         | 430         | 1046   | HF         | D: 75 [19]<br>V: 67 [17]         | 90d     | 43                    | 42                       |
| Ibrahim et al. <sup>49</sup>  | HOSPITAL score                   | Retrospective cohort | NA          | Ext         | -           | 692    | HfpEF      | 68.3 (11.8)                      | 30d     |                       | 27.3                     |
|                               | LACE / LACE+ index               | Retrospective cohort | NA          | Ext         | -           | 692    | HfpEF      | 68.3 (11.8)                      | 30d     |                       | 27.3                     |
| Keenan et al. <sup>50</sup>   | CMS HF administrative model      | Registry             | Yes         | Split, Ext. | 28319       | 845291 | HF         | 79.9 (7.8)                       | 30d     | 23.6                  | 23.7 (Ext)<br>NR (Split) |
|                               | CMS HF medical model             | Registry             | Yes         | Split, Ext. | 64329       | 64329  | HF         | 75-84                            | 30d     | 23.7                  |                          |
| Kitamura et al. <sup>51</sup> | FIM                              | Retrospective cohort | NA          | Ext         | -           | 113    | HF         | 80.5 (6.7)                       | 90d     |                       | 20.4                     |
| Leong et al. <sup>52</sup>    | 30-day HF readmission risk score | Retrospective cohort | Yes         | Split       | 888         | 587    | HF         | D: 70.0 (12.7)<br>V: 69.1 (12.8) | 30d     | 9.9                   |                          |
| Li et al. <sup>53</sup>       | NR                               | Retrospective cohort | Yes         | Split       | 51783       | 25887  | HF         | D: 84 [12]<br>V: 84[11]          | 30d     |                       | 24.2                     |
| Lim et al. <sup>54</sup>      | NR                               | Registry             | Yes         | No          | 4566        | -      | HF         | 70.5 (12.0)                      | 30d     | 6.6 (car)<br>13 (all) |                          |
| Reed et al. <sup>55</sup>     | AH model                         | Administrative       | Yes         | Split       | NR          | NR     | HF         | NR                               | 30d     |                       | NR                       |
|                               | CMS HF administrative model      | Administrative       | NA          | Split       | -           | NR     | HF         | NR                               | 30d     |                       | NR                       |
|                               | Hasan                            | Administrative       | NA          | Split       | -           | NR     | HF         | NR                               | 30d     |                       | NR                       |
|                               | LACE                             | Administrative       | NA          | Split       | -           | NR     | HF         | NR                               | 30d     |                       | NR                       |
|                               | PARR-30                          | Administrative       | NA          | Split       | -           | NR     | HF         | NR                               | 30d     |                       | NR                       |

**Table 1. Study characteristics (continued)**

| Study                                  | Model                       | Data source                              | Development | Validation | Sample size |                      | Population  | Average age                      | Outcome | Readmission (%) |                       |
|----------------------------------------|-----------------------------|------------------------------------------|-------------|------------|-------------|----------------------|-------------|----------------------------------|---------|-----------------|-----------------------|
|                                        |                             |                                          |             |            | Dev.        | Val.                 |             |                                  |         | Dev.            | Val.                  |
| Salah et al. <sup>56</sup>             | ELAN-HF score               | Prospective cohort<br>secondary analysis | Yes         | No         | 1301        | -                    | HF          | 74 [16]                          | 180d    | 36.1            |                       |
| Sudhakar et al. <sup>57</sup>          | CMS HF medical model        | Hospital database                        | NA          | Ext        | -           | 1046                 | HF          | 65.2 (16.6)                      | 30d     |                 | 35.3                  |
| Tan et al. <sup>58</sup>               | NR                          | Hospital database                        | Yes         | Split      | 246         | 104                  | HF          | D: 67.7 (12.3)<br>V: 69.0 (12.9) | 90d     | 24.5            | 11.7                  |
| Wang et al. <sup>59</sup>              | NR                          | Hospital database                        | Yes         | No         | 4548        | -                    | HF          | 68.5 [27.6]                      | 30d     | 25.1            |                       |
| Wang et al. <sup>60</sup>              | LACE                        | Retrospective cohort                     | NA          | Ext        | -           | 253                  | HF          | 56.6 (11.5)                      | 30d     |                 | 24.5                  |
| Yazdan-Ashoori et al. <sup>61</sup>    | CMS HF administrative model | Prospective cohort                       | NA          | Ext        | -           | 378                  | HF          | 73.1 (13.1)                      | 30d     |                 | 26                    |
|                                        | LACE                        | Prospective cohort                       | NA          | Ext        | -           | 378                  | HF          | 73.1 (13.1)                      | 30d     |                 | 26                    |
| Disdier Moulder et al. <sup>62</sup>   | NR                          | Prospective cohort                       | Yes         | No         | 258         |                      | HF, ACS, NR | 70.5 [23]                        | 30d     | 17              |                       |
|                                        | NR                          | Prospective cohort                       | Yes         | No         | 258         |                      | HF, ACS, NR | 70.5 [23]                        | 180d    | 38              |                       |
| Raposeiras-Roubin et al. <sup>63</sup> | GRACE                       | Retrospective cohort                     | NA          | Ext        | -           | 4229                 | HF, ACS     | 68.2 [18.7]                      | 30d     |                 | 2.6                   |
| Burke et al. <sup>64</sup>             | HOSPITAL score              | Retrospective cohort                     | NA          | Ext        | -           | HF: 3189<br>AMI: 767 | HF, AMI     | 65.8 (16.8)                      | 30d     |                 | HF: 18.2<br>AMI: 17.4 |
| Minges et al. <sup>65</sup>            | NR                          | Registry                                 | Yes         | Split      | 193899      | 194179               | HF, PCI     | 65+                              | 30d     | 11.4            |                       |
| Pack et al. <sup>66</sup>              | NR                          | Administrative                           | Yes         | Split      | 30826       | 7706                 | HVD         | 64.9 (12.2)                      | 90d     | 12.8            |                       |

**Table 1. Study characteristics (continued)**

| Study                              | Model                                          | Data source          | Development | Validation | Sample size |                     | Population  |                              | Average age | Outcome | Readmission (%)        |      |
|------------------------------------|------------------------------------------------|----------------------|-------------|------------|-------------|---------------------|-------------|------------------------------|-------------|---------|------------------------|------|
|                                    |                                                |                      |             |            | Dev.        | Val.                |             |                              |             |         | Dev.                   | Val. |
| Oliver-McNeil et al. <sup>67</sup> | ICD Readmission-Risk Score                     | Registry             | Update      | Ext        | 182         | -                   | ICD         | 69 (11)                      | 30d         |         | 17.6                   |      |
| Wasfy et al. <sup>68</sup>         | Pre-PCI model                                  | Registry             | Yes         | Split      | 24052       | 12008               | NR          | 64.8 (12.5)                  | 30d         | 10.4    |                        |      |
| Barnett et al. <sup>69</sup>       | NR                                             | Registry             | Update      | Ext        | 19964       | 19964               | Surgical    | 65.3 (12.4)                  | 30d         | 11.4    |                        |      |
| Brown et al. <sup>70</sup>         | STS Augmented Clinical Model                   | Prospective cohort   | Update      | Boot       | 1046        |                     | NR Surgical | 65.4 (9.8)                   | 30d         |         | NR                     |      |
|                                    | STS 30-day Readmission Model                   | Prospective cohort   | NA          | Ext        | -           | 1194                | Surgical    | 73.3 (10.1)                  | 30d         |         | NR                     |      |
| Espinoza et al. <sup>71</sup>      | 30-day readmission score after cardiac surgery | Retrospective cohort | Yes         | Split      | 2529        | 2567                | Surgical    | 65.1 (11.5)                  | 30d         | 11.9    |                        |      |
| Ferraris et al. <sup>72</sup>      | READMIT                                        | Prospective cohort   | Yes         |            | 2574        |                     | Surgical    | 63 (11)                      | 30d         | 9.8     |                        |      |
| Kilic et al. <sup>73</sup>         | NR                                             | Retrospective cohort | Yes         | Split      | 3898        | 1295                | Surgical    | D:61.9 (14.7) V: 61.6 (15.1) | 30d         | 10      | 11                     |      |
| Stuebe et al. <sup>74</sup>        | NR                                             | Hospital database    | Yes         | No         | 4800        |                     | Surgical    | 60-69                        | 30d         | 12      |                        |      |
| Tam et al. <sup>75</sup>           | NR                                             | Retrospective cohort | Yes         | Boot       | 63336       | NR                  | Surgical    | 66.2 (10.7)                  | 30d         | 11.3    |                        |      |
| Khera et al. <sup>76</sup>         | TAVR 30-Day Readmission Risk Model             | Administrative       | Yes         | Boots, Ext | 39305       | 40 (Boot) 885 (Ext) | TAVR        | D: 81.3 V: 81.7              | 30d         | 16.2    | 16.2 (Boot) 18.9 (Ext) |      |

1  
2  
3  
4  
5  
6  
7  
8  
9  
10  
11  
12  
13  
14  
15  
16  
17  
18  
19  
20  
21  
22  
23  
24  
25  
26  
27  
28  
29  
30  
31  
32  
33  
34  
35  
36  
37  
38  
39  
40  
41  
42  
43  
44  
45  
46

|                              |    |          |     |       |      |      |      |                             |           |     |      |
|------------------------------|----|----------|-----|-------|------|------|------|-----------------------------|-----------|-----|------|
| Sanchez et al. <sup>77</sup> | NR | Registry | Yes | Split | 6903 | 3442 | TAVR | D: 81.1 (7.9)<br>81.3 (7.9) | V:<br>30d | 9.8 | 10.7 |
|------------------------------|----|----------|-----|-------|------|------|------|-----------------------------|-----------|-----|------|

**Abbreviations:**

ACS: acute coronary syndrome, AF: atrial fibrillation, AH: Adventist Health Off-the-shelf model, Boot: bootstrapping, CABG: coronary artery bypass grafting, Car: cardiac-related, CMS=centers for Medicare and Medicaid services, CRSS: CABG Readmission Risk Score, d: days, Dev: development, Ext: external validation, Fim: motor and cognitive Functional Independence Measure, HF: heart failure, HFpEF: heart failure with preserved ejection fraction, HVD: heart valve disease, ICD: implantable cardioverter defibrillator, NA: not applicable, NR: not reported, PARR-30: Patients at Risk of Re-admission within 30-days, PCI: percutaneous coronary intervention, SD: standard deviation, Split: random split, TAVR: transcatheter aortic valve replacement, Val: validation

Legend: Age is reported as mean (SD), median [IQR] or average age as reported in the study.

For peer review only

## Risk of bias

Figure 2 summarizes the RoB and applicability assessment (Supplemental Table 1A). The overall RoB was high in 98.9% of the models and only one study<sup>23</sup> showed low RoB in all four domains.

For the domain participants, 82.4% of studies was assessed as high RoB because most studies performed retrospective data analyses or used data from existing sources with large number of candidate predictors that were originally developed for other purposes, e.g. administrative databases or registries. The domain predictors was assessed as high RoB in 27.5% of the models, 24.2% as low RoB and 48.4% as unclear RoB. For the domain outcome, 41.8%, 34.1% and 24.2% were assessed as high, low and unclear RoB respectively.

The domain analysis was assessed as high RoB in 97.8%. Most studies did not use appropriate statistics for the development or validation of prediction models. For example a description on how complexities in data were handled (e.g. competing risk of death) was often missing and relevant performance measures were incomplete (e.g. calibration).

The domains participants and predictors were assessed as low concerns regarding applicability in all studies. For the domain outcome, 70.3% of studies used all-cause readmission as the outcome of interest and were therefore assessed as low concerns regarding applicability.

## Prediction models

A total of 43 new models were developed for patients with HF (n=15), undergoing surgical procedures (n=12), AMI (n=9), transcatheter aortic valve replacement (TAVR) (n=2), a mixed sample with HF and coronary syndromes (n=2), arrhythmias (n=1), valvular disease (n=1), while one study did not specify the sample (table 1). The c-statistic was lower than 0.6 in five models, between 0.6 and 0.7 in 24 models, between 0.7 and 0.8 in six models, and between 0.8

1  
2  
3 and 0.9 in two models. In six models, the c-statistic was only reported for a validation cohort  
4  
5 (Table 2).  
6  
7

8 A total of 38 separate models were externally validated for patients with HF (n=26), AMI  
9 (n=4), surgical patients (n=3), acute coronary syndrome (n=2), arrhythmias (n=2), mixed  
10 sample with HF and coronary syndromes (n=1). The discrimination was lower than 0.6 in  
11 sixteen models, between 0.6 and 0.7 in fifteen models, between 0.7 and 0.8 in five models, and  
12 between 0.8 and 0.9 in two models (Table 2).  
13  
14  
15  
16  
17  
18  
19

20 The discrimination of six models was evaluated in multiple independent cohorts and was  
21 pooled in meta-analyses (Figure 3, Supplemental Figures 1-6): the CMS AMI administrative  
22 model<sup>25,26</sup> (0.65, 95% CI 0.56-0.73); the CMS HF administrative model<sup>37-39,42,45,46,50,55,61</sup> (0.60,  
23 95% CI 0.58-0.62); the CMS HF medical model<sup>42,44,47,50,57</sup> (0.60, 95% CI 0.58-0.62); the  
24 HOSPITAL score<sup>27,49,64</sup> (0.64, 95% CI 0.58-0.70); the GRACE score<sup>21,63</sup> (0.78, 95% CI 0.63-  
25 0.86); and the LACE score<sup>39,49,55,60,61</sup> (0.62, 95% CI 0.53-0.70).  
26  
27  
28  
29  
30  
31  
32  
33  
34

35 On average, models for AMI patients had the best discrimination (0.67, n=16), followed by  
36 TAVR patients (0.65, n=2), HF patients (0.64, n=45), and surgical patients (0.63, n=17). The  
37 discrimination was highest in studies using secondary analysis (0.70, n=2) and retrospective  
38 cohort studies (0.69, n=23), and was lowest in studies using registries (0.61, n=17) and hospital  
39 databases (0.61, n=18). The discrimination decreased when the number of predictors increased  
40 (beta -0.002, n=90). There were no moderation effects based on the average age of the sample,  
41 outcome definition and endpoint of the prediction (Supplemental Figures 7–8 and  
42 Supplemental Table 1B).  
43  
44  
45  
46  
47  
48  
49  
50  
51  
52

53 The calibration was reported for 27 models using multiple measures and could not be pooled  
54 (Table 2).  
55  
56  
57  
58  
59  
60

**Table 2. Model discrimination and calibration**

| Study                           | Model                                    | Setting              | Predictors, n | Cohort                    | Discrimination                            | Type calibration      | Calibration                          |
|---------------------------------|------------------------------------------|----------------------|---------------|---------------------------|-------------------------------------------|-----------------------|--------------------------------------|
| Moretti et al. <sup>18</sup>    | EuroHeart PCI score                      | ACS                  | 16            | External                  | 0.59 (0.48 - 0.71)                        | NA                    |                                      |
| Asche et al. <sup>19</sup>      | NR                                       | AMI                  | 19            | Development, random split | 0.74, NR                                  | NA                    |                                      |
| Cediel et al. <sup>20</sup>     | TARRACO Risk Score                       | AMI type 2, ischemia | 7             | Development (30d)         | 0.71 (0.61 - 0.82)                        | NA                    |                                      |
|                                 |                                          | AMI type 2, ischemia | 7             | Development (180d)        | 0.71 (0.64 - 0.78)                        | NA                    |                                      |
| Burke et al. <sup>64</sup>      | HOSPITAL score                           | AMI                  | 7             | External                  | 0.66 (0.61 - 0.71)                        | HLT                   | p=0.49                               |
| Chotechuan et al. <sup>21</sup> | GRACE                                    | AMI                  | 9             | External (30d)            | 0.77 (0.65 - 0.88)                        | NA                    |                                      |
|                                 | GRACE                                    | AMI                  | 9             | External (180d)           | 0.63 (0.49 - 0.77)                        | NA                    |                                      |
| Hilbert et al. <sup>22</sup>    | AMI decision tree                        | AMI                  | 44            | Development, External     | 0.65 (0.64 - 0.66),<br>0.61 (0.61 - 0.62) | NA                    |                                      |
| Dodson et al. <sup>23</sup>     | SILVER-AMI 30-day readmission calculator | AMI                  | 10            | Development, random split | 0.65, 0.63                                | HLT                   | p>0.05, p=0.05                       |
| Kini et al. <sup>24</sup>       | NR                                       | AMI                  | 12            | Development, random split | NR, 0.66                                  | Slope, in large, plot | 0.973 (p=0.330),<br>-0.038 (p=0.221) |
| Nguyen et al. <sup>25</sup>     | AMI READMITS score                       | AMI                  | 7             | Development, random split | 0.75 (0.70 - 0.80),<br>0.73 (0.71 - 0.74) | Plot, Plot            |                                      |
|                                 | Full-stay AMI model                      | AMI                  | 10            | Development, random split | 0.78 (0.74 - 0.83),<br>0.75 (0.74 - 0.76) | Plot                  |                                      |
|                                 | CMS AMI administrative model             | AMI                  | 32            | External                  | 0.74 (0.69 - 0.74)                        | Plot                  |                                      |

Table 2. Model discrimination and calibration (continued)

| Study                          | Model                               | Setting        | Predictors, n | Cohort                              | Discrimination                         | Type calibration | Calibration                      |
|--------------------------------|-------------------------------------|----------------|---------------|-------------------------------------|----------------------------------------|------------------|----------------------------------|
| Krumholz et al. <sup>26</sup>  | CMS AMI administrative model        | AMI            | 32            | Development, external, random split | 0.63, 0.63, 0.62                       | In large, slope  |                                  |
|                                | CMS AMI medical model               | AMI            | 45            | Development, random split           | 0.58, 0.59                             | NA               | 0, 1 / 0.015, 0.997/0.015, 0.983 |
| Rana et al. <sup>27</sup>      | Elixhauser index                    | AMI            | 30            | External                            | 0.53 (0.42 - 0.65)                     | NA               |                                  |
|                                | HOSPITAL score                      | AMI            | 7             | External                            | 0.60 (0.47 - 0.73)                     | NA               |                                  |
| Atzema et al. <sup>28</sup>    | AFTER Part 2 scoring system         | Arrhythmia, AF | 12            | Development                         | 0.69, NR                               | NA               |                                  |
| Lahewala et al. <sup>29</sup>  | CHADS2                              | Arrhythmia, AF | 5             | External (30d)                      | 0.64                                   | NA               |                                  |
|                                | CHADS2                              | Arrhythmia, AF | 5             | External (90d)                      | 0.63                                   | NA               |                                  |
|                                | CHA2DS-VASc                         | Arrhythmia, AF | 9             | External (30d)                      | 0.65                                   | NA               |                                  |
|                                | CHA2DS-VASc                         | Arrhythmia, AF | 9             | External (90d)                      | 0.63                                   | NA               |                                  |
| Benuzillo et al. <sup>30</sup> | CRSS                                | CABG           | 5             | Development, bootstrapping          | 0.63, 0.63                             | HLT              | 7.13 (p=0.52), 9.31 (p=0.32)     |
| Deo et al. <sup>31</sup>       | 30-days CABG Readmission Calculator | CABG           | 20            | Development                         | 0.65                                   | NA               |                                  |
| Engoren et al. <sup>32</sup>   | NR                                  | CABG           | 6             | Development, random split           | 0.68 (0.64 - 0.72), 0.68 (0.64 - 0.68) | NA               |                                  |
| Lancey et al. <sup>33</sup>    | NR                                  | CABG           | 8             | Development, random split           | 0.64, 0.57                             | NA               |                                  |
| Rosenblum et al. <sup>34</sup> | The STS PROM score                  | CABG           | 40            | External                            | 0.59 (0.57 - 0.60)                     | NA               |                                  |



**Table 2. Model discrimination and calibration (continued)**

| Study                                | Model                                            | Setting | Predictors,<br>n | Cohort                      | Discrimination     | Type calibration | Calibration   |
|--------------------------------------|--------------------------------------------------|---------|------------------|-----------------------------|--------------------|------------------|---------------|
| Zitser-Gurevich et al. <sup>35</sup> | NR                                               | CABG    | 17               | Development, external (30d) | 0.63, 0.66/0.63    | HLT              | 7.91 (p=0.44) |
|                                      | NR                                               | CABG    | 13               | Development (100d)          | 0.65               | HLT              | 6.76 (p=0.56) |
| Zywot et al. <sup>36</sup>           | CABG Risk Scale                                  | CABG    | 27               | Development, external       | NR, 0.70           | Plot             |               |
| Ahmad et al. <sup>37</sup>           | CMS HF administrative model                      | HF      | 37               | External                    | 0.66 (0.57 - 0.76) | HLT              | p=0.19        |
| Amarasingham et al. <sup>38</sup>    | ADHERE                                           | HF      | 3                | External                    | 0.56 (0.54 - 0.59) | NA               |               |
|                                      | CMS HF administrative model                      | HF      | 37               | External                    | 0.66 (0.63 - 0.68) | NA               |               |
|                                      | Tabak mortality score                            | HF      | 18               | External                    | 0.61 (0.59 - 0.64) | NA               |               |
| Au et al. <sup>39</sup>              | Administrative Claims Model: HF 30-day mortality | HF      | 17               | External                    | 0.58 (0.58 - 0.59) | NA               |               |
|                                      | Charlson Comorbidity Score                       | HF      | 32               | External                    | 0.55 (0.55- 0.56)  | NA               |               |
|                                      | CMS HF administrative model                      | HF      | 37               | External                    | 0.59 (0.59 - 0.60) | NA               |               |
|                                      | LACE                                             | HF      | 18               | External                    | 0.58 (0.58 - 0.59) | NA               |               |
| Bardhan et al. <sup>40</sup>         | NR                                               | HF      | 30               | Development                 | 0.56               | NA               |               |
| Betihavas et al. <sup>41</sup>       | NR                                               | HF      | 7                | Development, bootstrapping  | NR, 0.80           | NA               |               |
| Burke et al. <sup>64</sup>           | HOSPITAL score                                   | HF      | 7                | External                    | 0.67 (0.65 - 0.70) | HLT              | p=0.10        |

**Table 2. Model discrimination and calibration (continued)**

| Study                         | Model                            | Setting | Predictors, n | Cohort                      | Discrimination                            | Type calibration | Calibration |
|-------------------------------|----------------------------------|---------|---------------|-----------------------------|-------------------------------------------|------------------|-------------|
| Cox et al. <sup>42</sup>      | CMS HF administrative model      | HF      | 37            | External                    | 0.61                                      | NA               |             |
|                               | CMS HF medical model             | HF      | 20            | External                    | 0.60                                      | NA               |             |
| Delgado et al. <sup>43</sup>  | 15-day CV readmission risk score | HF      | 5             | Development, bootstrapping  | 0.65, 0.63                                | Plot             |             |
|                               | 30-day CV readmission risk score | HF      | 11            | Development, bootstrapping  | 0.66, 0.64                                | Plot             |             |
| Formiga et al. <sup>44</sup>  | CMS HF medical model             | HF      | 19            | External (30d)              | 0.65 (0.57 - 0.72)                        | NA               |             |
|                               | CMS HF medical model             | HF      | 19            | External (90d)              | 0.62 (0.56 - 0.68)                        | NA               |             |
| Frizzell et al. <sup>45</sup> | CMS HF administrative model      | HF      | 37            | External                    | 0.60                                      | NA               |             |
| Hammill et al. <sup>46</sup>  | CMS HF administrative model      | HF      | 37            | External                    | 0.59                                      | Plot             |             |
| Hilbert et al. <sup>22</sup>  | HF decision tree                 | HF      | 44            | Development, External       | 0.59 (0.58 - 0.60),<br>0.58 (0.58 - 0.59) | NA               |             |
| Hummel et al. <sup>47</sup>   | CMS HF medical model             | HF      | 28            | External                    | 0.61                                      | NA               |             |
| Huynh et al. <sup>48</sup>    | NR                               | HF      | 12            | Development, external (30d) | 0.82 (0.76 - 0.87),<br>0.73 (0.69 - 0.77) | NA               |             |
|                               | NR                               | HF      | 12            | Development, external (90d) | NR, 0.65                                  | NA               |             |

**Table 2. Model discrimination and calibration (continued)**

| Study                         | Model                            | Setting | Predictors,<br>n | Cohort                              | Discrimination                            | Type calibration | Calibration                                 |
|-------------------------------|----------------------------------|---------|------------------|-------------------------------------|-------------------------------------------|------------------|---------------------------------------------|
| Ibrahim et al. <sup>49</sup>  | HOSPITAL score                   | HfpEF   | 7                | External                            | 0.60 (0.55 - 0.64)                        | NA               |                                             |
|                               | LACE                             | HfpEF   | 18               | External                            | 0.55 (0.50 - 0.60)                        | NA               |                                             |
|                               | LACE+ index                      | HfpEF   | 24               | External                            | 0.57 (0.52 - 0.62)                        | NA               |                                             |
| Keenan et al. <sup>50</sup>   | CMS HF administrative model      | HF      | 37               | Development, external, random split | 0.60, 0.60, 0.61                          | In large, slope  | 0, 1 / 0.02, 1.01 / 0.09, 1.05              |
|                               | CMS HF medical model             | HF      | 30               | Development, random split           | 0.58, 0.61                                | In large, slope  | 0, 1 / 0, 1                                 |
| Kitamura et al. <sup>51</sup> | FIM                              | HF      | 13               | External                            | 0.78                                      | NA               |                                             |
| Leong et al. <sup>52</sup>    | 30-day HF readmission risk score | HF      | 7                | Development, random split           | 0.76, 0.76                                | NA               |                                             |
| Li et al. <sup>53</sup>       | NR                               | HF      | 10               | Development, random split           | 0.63 (0.62 - 0.63)<br>0.63 (0.62 - 0.63)  | HLT, plot        | 0.15 (p>0.005)                              |
| Lim et al. <sup>54</sup>      | NR                               | HF      | 13               | Development                         | 0.68 (car), 0.62 (all)                    | HLT              | 27.5 (p=0.001) (car)<br>8.0 (p=0.429) (all) |
| Reed et al. <sup>55</sup>     | AH model                         | HF      | 14               | Development, random split           | 0.86 (0.85 - 0.86),<br>0.85 (0.84 - 0.86) | NA               |                                             |
|                               | CMS HF administrative model      | HF      | 37               | Random split                        | 0.55 (0.54 - 0.56)<br>0.55 (0.54 - 0.57)  | NA               |                                             |
|                               | Hasan                            | HF      | 9                | Random split                        | 0.80 (0.79 - 0.81)<br>0.80 (0.80 - 0.82)  | NA               |                                             |
|                               | LACE                             | HF      | 18               | Random split                        | 0.75 (0.74 - 0.81)<br>0.74 (0.73 - 0.76)  | NA               |                                             |

**Table 2. Model discrimination and calibration (continued)**

| Study                                    | Model                       | Setting     | Predictors,<br>n | Cohort                    | Discrimination                                                                       | Type calibration | Calibration |
|------------------------------------------|-----------------------------|-------------|------------------|---------------------------|--------------------------------------------------------------------------------------|------------------|-------------|
| Reed et al. <sup>55</sup><br>(continued) | PARR-30                     | HF          | 10               | Random split              | 0.82 (0.81 - 0.83)<br>0.81 (0.80 - 0.82)                                             | NA               |             |
| Salah et al. <sup>56</sup>               | ELAN-HF score               | HF          | 10               | Development               | 0.60 (0.56 - 0.64)                                                                   | NA               |             |
| Sudhakar et al. <sup>57</sup>            | CMS HF medical model        | HF          | 20               | External                  | 0.61 (0.57-0.64)<br>≥65y: 0.59 (0.53-0.64)<br>Random patient-level: 0.58 (0.50-0.65) | NA               |             |
| Tan et al. <sup>58</sup>                 | NR                          | HF          | 3                | Random split              | 0.73                                                                                 | HLT, plot        | p=0.62      |
| Wang et al. <sup>59</sup>                | NR                          | HF          | 12               | Development               | 0.65                                                                                 | NA               |             |
| Wang et al. <sup>60</sup>                | LACE                        | HF          | 18               | External                  | 0.56 (0.48 - 0.64)                                                                   | NA               |             |
| Yazdan-Ashoori et al. <sup>61</sup>      | CMS HF administrative model | HF          | 37               | External                  | 0.61 (0.55 - 0.67)                                                                   | NA               |             |
|                                          | LACE                        | HF          | 18               | External                  | 0.59 (0.52 - 0.65)                                                                   | HLT              | p=0.73      |
| Disdier Moulder et al. <sup>62</sup>     | NR                          | HF, ACS, NR | 4                | Development (30d)         | 0.68                                                                                 | NA               |             |
|                                          | NR                          | HF, ACS, NR | 5                | Development (180d)        | 0.69                                                                                 | NA               |             |
| Raposeiras-Roubín et al. <sup>63</sup>   | GRACE                       | HF, ACS     | 9                | External                  | 0.74 (0.73-0.80)                                                                     | HLT              | p=0.14      |
| Minges et al. <sup>65</sup>              | NR                          | HF, PCI     | 35               | Development, random split | 0.67, 0.66                                                                           | NA               |             |

**Table 2. Model discrimination and calibration (continued)**

| Study                                 | Model                                             | Setting  | Predictors,<br>n | Cohort                                                       | Discrimination                                            | Type calibration                       | Calibration      |
|---------------------------------------|---------------------------------------------------|----------|------------------|--------------------------------------------------------------|-----------------------------------------------------------|----------------------------------------|------------------|
| Pack et al. <sup>66</sup>             | NR                                                | HVD      | 28               | Development,<br>random split                                 | 0.67 (full dev.)/<br>0.65 (nomogram),<br>0.67 (full val.) | Harrell's E, O:E,<br>Harrell's E, plot | 0.1%, 1.9%, 1.6% |
| Oliver-McNeil et<br>al. <sup>67</sup> | ICD Readmission-Risk Score                        | ICD      | 4                | Update, External                                             | 0.69 (0.58 - 0.79)                                        | HLT, plot                              | 3.44 (p=0.49)    |
| Wasfy et al. <sup>68</sup>            | Pre-PCI model                                     | NR       | 23               | Development,<br>random split                                 | 0.68, 0.67                                                | HLT, plot                              | p=0.59           |
| Barnett et al. <sup>69</sup>          | NR validation                                     | Surgical | 15               | External                                                     | 0.59                                                      | NA                                     |                  |
|                                       | NR update                                         | Surgical | 18               | Update                                                       | 0.60 (0.59 - 0.62)                                        | NA                                     |                  |
| Brown et al. <sup>70</sup>            | STS Augmented Clinical<br>Model                   | Surgical | 27               | Update (bootstrap),<br>random split,<br>external (bootstrap) | 0.66 (0.61 - 0.72),<br>0.56,<br>0.47 (0.42 - 0.53)        | HLT                                    | p=1.0            |
|                                       | STS 30-day Readmission<br>Model                   | Surgical | 21               | Update (bootstrap),<br>random split,<br>external (bootstrap) | 0.66 (0.62 - 0.71),<br>0.58,<br>0.47 (0.41 - 0.52)        | HLT                                    | p=0.492          |
| Espinoza et al. <sup>71</sup>         | 30-day readmission score<br>after cardiac surgery | Surgical | 5                | Development,<br>random split                                 | 0.66 (0.63 - 0.70),<br>0.64 (0.61 - 0.67)                 | NA                                     |                  |

Table 2. Model discrimination and calibration (continued)

| Study                         | Model                              | Setting  | Predictors, n | Cohort                              | Discrimination | Type calibration      | Calibration          |
|-------------------------------|------------------------------------|----------|---------------|-------------------------------------|----------------|-----------------------|----------------------|
| Ferraris et al. <sup>72</sup> | READMIT                            | Surgical | 9             | Development                         | 0.70           | HLT                   | 5.966 (p=0.651)      |
| Kilic et al. <sup>73</sup>    | NR                                 | Surgical | 15            | Development, random split           | NR, 0.64       | HLT, plot             | p=0.45, p=0.57       |
| Stuebe et al. <sup>74</sup>   | NR                                 | Surgical | 7             | Development                         | 0.63           | NA                    |                      |
| Tam et al. <sup>75</sup>      | NR                                 | Surgical | 29            | Development, bootstrapping          | 0.63, 0.65     | Plot                  |                      |
| Khera et al. <sup>76</sup>    | TAVR 30-Day Readmission Risk Model | TAVR     | 11            | Development, random split, external | NR, 0.63, 0.69 | HLT, RMSE, RMSE, plot | p=0.33, 0.978, 0.928 |
| Sanchez et al. <sup>77</sup>  | NR                                 | TAVR     | 10            | Development, random split           | 0.61, 0.60     | HLT                   | p=0.749, p=0.403     |

**Abbreviations:** ACS: acute coronary syndrome, AF: atrial fibrillation, AH: Adventist Health Off-the-shelf model, CABG: coronary artery bypass grafting, Car: cardiac-related, CMS=centers for Medicare and Medicaid services, CRSS: CABG Readmission Risk Score, d: days, dev: development, Fim: motor and cognitive Functional Independence Measure, HF: heart failure, HFpEF: heart failure with preserved ejection fraction, HLT: Hosmer-Lemeshow test, HVD: heart valve disease, ICD: implantable cardioverter defibrillator, NA: not applicable, NR: not reported, O:E: observed:expected, PARR-30: Patients at Risk of Re-admission within 30-days, PCI: percutaneous coronary intervention, plot: calibration plot, TAVR: transcatheter aortic valve replacement, val: validation.

## Predictors

A total of 766 predictor values were estimated in the included models. The median number of predictors per model was 15 (IQR=9–28). The predictors were mostly situated in the domains medical comorbidities (n=211), disease and hospital characteristics (n=128), demographic data (n=128), laboratory values (n=97), and medical history characteristics (n=51). Age (n=47), the presence of diabetes (n=26), insurance status (n=24), length of stay (n=28), and gender (n=23) were the most prevalent predictors. There was little consistency in the definition of predictors, and most studies did not report how they were measured.

Only 18 predictors were similarly defined in multiple studies and could be pooled for the outcome readmission at 30 days (Figure 4, Supplemental Table 2A and Supplemental Figures 9–26). The coefficients of four predictors demonstrated a consistent and significant association across the different samples: chronic obstructive pulmonary disease (COPD), HF or history of HF, and valvular disease. The coefficients of eleven predictors demonstrated an overall significant association, i.e. age, female gender, arrhythmias, chronic lung disease, diabetes mellitus, cerebrovascular disease, cardiovascular accident, anemia, peripheral vascular disease, urgent admission, and infection, but this was not consistent across the samples and the prediction intervals were not significant. The effect of these predictors was mostly smaller in the HF samples.

The coefficients for most predictors could not be pooled because they had different definitions, cutoff values or reference categories. However, renal disease, including dialysis, a longer length of stay, creatinine, NT-proBNP, and previous hospital admissions demonstrated a consistent association with readmissions.

## Discussion

In this systematic review, we included 60 studies that reported the results from 81 separate clinical risk prediction models and 766 risk predictors for unplanned readmission in patients with acute heart disease. We found some promising prediction models, however, no clinical model demonstrated good discrimination (i.e. c-statistic > 0.8) in independently externally validated cohorts, regardless of the underlying patient populations. GRACE was the only model that demonstrated adequate discrimination in multiple cohorts in patients with acute coronary syndromes<sup>21,63</sup> and HF.<sup>63</sup> There was little consistency in the measurement of risk predictors.

The results of our review are in line with previous systematic reviews which have mainly focused on samples of patients with HF, AMI or focused on generic prediction models. All reviews confirm that the discrimination is generally low. Our review confirms the importance of previous HF<sup>5,6</sup> and previous hospital admissions<sup>6,8</sup> as consistent predictors for the risk of readmission. In addition two prevalent comorbidities, COPD and valve disease were also consistent predictors across the different populations. Other reviews also identified the importance of age, gender, comorbidities and certain laboratory values. These were also significant in our review but the association was not always consistent across the different populations or heterogeneously measured making comparisons difficult. As a result, no clinical risk prediction model or set of predictors that is relevant for different populations of heart disease could be identified.

Our review focused specifically on prediction models with a clinical presentation that can be used in daily practice, e.g. risk scores or nomograms. These simple models do not consider interactions between predictor values or nonlinear link functions in their predictions. This may partially explain the poor discrimination.<sup>78</sup> Using web applications or electronic patient records to run more complex prediction algorithms can likely offer a solution for future models. A



1  
2  
3 recent systematic review observed an average c-statistic of 0.74 for models using electronic  
4 patient records and machine learning algorithms.<sup>11</sup> Our review included eleven  
5 studies<sup>21,23,29,34,36,57,61,63,70,75,76</sup> that developed or validated electronic tools for risk prediction  
6 and their discrimination ranged between 0.59 and 0.77. However, these electronic tools were  
7 mostly derived from score charts and nomograms.  
8  
9

10 There are also concerns about the generalizability of the prediction models. The median age of  
11 patients included in the samples was 68 years (IQR=65–75). However, older and frail patients  
12 suffer more multimorbidity and geriatric syndromes, and the distribution of predictor and  
13 outcome values will also be different than in younger samples. It is therefore unlikely that the  
14 majority of the current models will hold their value in daily clinical practice where there is a  
15 high prevalence of older patients. Only eight studies<sup>19,23,26,28,48,50,53,77</sup> included one or more  
16 geriatric risk factors (e.g. physical performance, dementia) as predictors for readmission. The  
17 performance of models including geriatric conditions was similar to models without these  
18 conditions. This might be explained by the relative young mean age of the samples in our  
19 review. Mahmoudi et al.<sup>11</sup> reported that functional and frailty status are important predictors,  
20 but were only included in a small number of studies. Frailty was not identified in any of the  
21 models in our review. It might be valuable to examine the additive value of these predictors in  
22 prediction models for patients with heart disease.  
23  
24  
25  
26  
27  
28  
29  
30  
31  
32  
33  
34  
35  
36  
37  
38  
39  
40  
41  
42  
43

44 We observed high RoB in almost all clinical risk prediction models (98.8%). This was mainly  
45 because the calibration was lacking or not fully reported (e.g. only p-value of Hosmer-  
46 Lemeshow test). Furthermore, most studies performed retrospective data analyses or used data  
47 from existing sources. However, our results demonstrate that studies using these data sources  
48 had the lowest c-statistic, and that the c-statistic decreased when more predictors were tested.  
49 Databases often have missing data, misclassification bias, and random measurement error,  
50 which likely explains their average poor performance.<sup>79</sup> Only the SILVER-AMI study<sup>23</sup>  
51  
52  
53  
54  
55  
56  
57  
58  
59  
60

1  
2  
3 demonstrated low RoB on all domains. However, their readmission risk calculator for older  
4  
5 AMI patients only discriminated modestly (c-statistic = 0.65).  
6

7  
8 Our review show the current state-of-the art of risk prediction in patients with acute heart  
9  
10 disease. The timely identification of patients with acute heart disease at risk of readmission  
11  
12 remains challenging with the prediction models identified in this systematic review. Therefore,  
13  
14 further research in risk prediction remains important and some recommendations for further  
15  
16 research can be derived from this review. First, consistency is needed in the definition and  
17  
18 measurement of predictors. More homogeneity might improve the identification of important  
19  
20 predictors and their effect on readmission. Based on our insights, we believe that models could  
21  
22 be improved by incorporating some key predictors, i.e. age, gender, comorbidity scores (or at  
23  
24 least heart failure, COPD, cardiovascular disease, diabetes mellitus), admission status,  
25  
26 readmission history, and the geriatric profile (e.g. functional status, cognitive status). Because  
27  
28 there are a still a large number of potential predictors, a large sample size is needed to estimate  
29  
30 the coefficients with sufficient precision, and to prevent against overfitting the models. Some  
31  
32 selection of predictors may still be warranted, and penalized techniques (e.g. lasso regression)  
33  
34 should be preferred over traditional selection based on p-values. Second, the results suggest  
35  
36 that multiple predictors are associated with readmissions regardless of the underlying  
37  
38 population. Therefore, attention might be shifted from developing new risk prediction models  
39  
40 to updating and externally validating existing prediction models in different populations with  
41  
42 heart disease. For example, the Adventist Health Off-the-shelf model<sup>55</sup> showed high  
43  
44 discrimination rates in both the development (0.86) and validation cohort (0.85). External  
45  
46 validation is recommended to examine the generalizability of this model in other settings. In  
47  
48 addition, the AMI READMITS score<sup>25</sup>, full-stay AMI readmission model<sup>25</sup>, pre-PCI model<sup>68</sup>,  
49  
50 motor and cognitive Functional Independence Measure (FIM)<sup>51</sup>, READMIT<sup>72</sup>, 30-day  
51  
52 readmission model of Huynh et al.<sup>48</sup>, and the model of Engoren et al.<sup>32</sup> were examined in one  
53  
54  
55  
56  
57  
58  
59  
60

1  
2  
3 study and showed reasonable c-statistics in the development (0.68 – 0.82) and validation  
4 cohorts (0.64 – 0.78). For these studies, model updating recalibration and external validation  
5 is recommended to improve the predictive performance and generalizability of these prediction  
6 models. Third, the applicability of current prediction models in daily practice is an important  
7 concern as most models had poor performance, were not replicated and had high RoB. More  
8 high-quality studies are needed that evaluate the discrimination, calibration and clinical  
9 usefulness. To limit the risk of bias as much as possible, future studies should adhere to the  
10 relevant reporting guidelines<sup>80</sup> and could use PROBAST<sup>16</sup> as a guidance to plan their study.  
11 Fourth, more complex models integrated in electronic patient records may results in better  
12 predictions.

### 23 24 25 **Limitations**

26  
27 Although we performed an extensive literature search, we might have missed some eligible  
28 studies, particularly those published in non-English languages. We were able to perform meta-  
29 analysis for predictors that were often ( $\geq 5$  models) reported. However, it might be possible  
30 that some less frequently mentioned predictors (e.g. geriatric predictors) are a valuable addition  
31 in clinical practice. The review included a large number of results and statistical tests which  
32 may result in an inflated alpha error. The meta-regression identified that models with less  
33 predictors had a better discrimination, but this could also be explained by overfitting models;  
34 this could not be tested.

### 35 36 37 38 39 40 41 42 43 44 45 46 47 **Conclusion**

48  
49 A large number of clinical models have recently been developed. Although some models are  
50 promising as they demonstrated adequate to good discrimination, no model can currently be  
51 recommended for clinical practice. The lack of independently validated studies, high risk of  
52 bias and low consistency in measured predictors limit their applicability. Model updating and  
53 external validation is urgently needed.

1  
2  
3  
4  
5  
6  
7  
8  
9  
10  
11  
12  
13  
14  
15  
16  
17  
18  
19  
20  
21  
22  
23  
24  
25  
26  
27  
28  
29  
30  
31  
32  
33  
34  
35  
36  
37  
38  
39  
40  
41  
42  
43  
44  
45  
46  
47  
48  
49  
50  
51  
52  
53  
54  
55  
56  
57  
58  
59  
60

For peer review only

### Data statement section

All data relevant to the study are included in the article or uploaded as supplementary information.

### Contributorship Statement

Bastiaan Van Grootven and Patricia Jepma had full access to all the data in the study and take responsibility for the integrity of the data and the accuracy of the data analysis. Bastiaan Van Grootven and Patricia Jepma contributed equally as first authors.

*Concept and design:* all authors; *Acquisition, analysis or interpretation of data:* Bastiaan Van Grootven, Patricia Jepma, Corinne Rijpkema, Mariska Leeflang, Joost Daams; *Drafting the manuscript:* Bastiaan Van Grootven, Patricia Jepma; *Critical revision of the manuscript:* all authors; *Analysis:* Bastiaan Van Grootven, Patricia Jepma; *Supervision:* Bianca Buurman.

### Funding

This work was partly supported by the Research Foundation Flanders (FWO) fellowship grant [grant number 1165518N [BVG]], BVG) and by the Dutch Research Council (NWO) [grant number 023.009.036 [PJ]]. The funders had no role in the design and conduct of the study; collection, management, analysis, and interpretation of the data; preparation, review, or approval of the manuscript; and decision to submit the manuscript for publication.

### Conflict of interest

None declared.

## License statement

I, the Submitting Author has the right to grant and does grant on behalf of all authors of the Work (as defined in the below author licence), an exclusive licence and/or a non-exclusive licence for contributions from authors who are: i) UK Crown employees; ii) where BMJ has agreed a CC-BY licence shall apply, and/or iii) in accordance with the terms applicable for US Federal Government officers or employees acting as part of their official duties; on a worldwide, perpetual, irrevocable, royalty-free basis to BMJ Publishing Group Ltd (“BMJ”) its licensees and where the relevant Journal is co-owned by BMJ to the co-owners of the Journal, to publish the Work in Heart and any other BMJ products and to exploit all rights, as set out in our licence.

The Submitting Author accepts and understands that any supply made under these terms is made by BMJ to the Submitting Author unless you are acting as an employee on behalf of your employer or a postgraduate student of an affiliated institution which is paying any applicable article publishing charge (“APC”) for Open Access articles. Where the Submitting Author wishes to make the Work available on an Open Access basis (and intends to pay the relevant APC), the terms of reuse of such Open Access shall be governed by a Creative Commons licence – details of these licences and which Creative Commons licence will apply to this Work are set out in our licence referred to above.

## References

1. Virani SS, Alonso A, Benjamin EJ, et al. Heart Disease and Stroke Statistics-2020 Update: A Report From the American Heart Association. *Circulation* 2020;141(9):e139-e596.
2. Shipe ME, Deppen SA, Farjah F, Grogan EL. Developing prediction models for clinical use using logistic regression: an overview. *J Thorac Dis* 2019;11(Suppl 4):S574-S584.
3. Smith LN, Makam AN, Darden D, et al. Acute Myocardial Infarction Readmission Risk Prediction Models: A Systematic Review of Model Performance. *Circ Cardiovasc Qual Outcomes* 2018;11(1):e003885. 10.1161/CIRCOUTCOMES.117.003885 [doi].
4. Di Tanna GL, Wirtz H, Burrows KL, Globe G. Evaluating risk prediction models for adults with heart failure: A systematic literature review. *PLoS One* 2020;15(1):e0224135. 10.1371/journal.pone.0224135 [doi].
5. Mahajan SM, Heidenreich P, Abbott B, Newton A, Ward D. Predictive models for identifying risk of readmission after index hospitalization for heart failure: A systematic review. *Eur J Cardiovasc Nurs* 2018;17(8):675-689.
6. O'Connor M, Murtaugh CM, Shah S, et al. Patient Characteristics Predicting Readmission Among Individuals Hospitalized for Heart Failure. *Med Care Res Rev* 2016;73(1):3-40.
7. Rahimi K, Bennett D, Conrad N, et al. Risk prediction in patients with heart failure: a systematic review and analysis. *JACC Heart Fail* 2014;2(5):440-446.
8. Betihavas V, Davidson PM, Newton PJ, Frost SA, Macdonald PS, Stewart S. What are the factors in risk prediction models for rehospitalisation for adults with chronic heart failure? *Aust Crit Care* 2012;25(1):31-40.

- 1  
2  
3 9. Desai MM, Stauffer BD, Feringa HH, Schreiner GC. Statistical models and patient  
4  
5 predictors of readmission for acute myocardial infarction: a systematic review. *Circ*  
6  
7 *Cardiovasc Qual Outcomes* 2009;2(5):500-507.  
8  
9
- 10  
11 10. Ross JS, Mulvey GK, Stauffer B, et al. Statistical models and patient predictors of  
12  
13 readmission for heart failure: a systematic review. *Arch Intern Med* 2008;168(13):1371-1386.  
14  
15
- 16  
17 11. Mahmoudi E, Kamdar N, Kim N, Gonzales G, Singh K, Waljee AK. Use of electronic  
18  
19 medical records in development and validation of risk prediction models of hospital  
20  
21 readmission: systematic review. *BMJ* 2020;369:m958. 10.1136/bmj.m958 [doi].  
22  
23
- 24  
25 12. Zhou H, Della PR, Roberts P, Goh L, Dhaliwal SS. Utility of models to predict 28-day or  
26  
27 30-day unplanned hospital readmissions: an updated systematic review. *BMJ Open*  
28  
29 2016;6(6):e011060-2016-011060. 10.1136/bmjopen-2016-011060 [doi].  
30  
31
- 32  
33 13. Song F, Sheldon TA, Sutton AJ, Abrams KR, Jones DR. Methods for exploring  
34  
35 heterogeneity in meta-analysis. *Eval Health Prof* 2001;24(2):126-151.  
36  
37
- 38  
39 14. Moher D, Liberati A, Tetzlaff J, Altman DG, PRISMA Group. Preferred reporting items  
40  
41 for systematic reviews and meta-analyses: the PRISMA statement. *PLoS Med*.  
42  
43 2009;6(7):e1000097. 10.1371/journal.pmed.1000097 [doi].  
44  
45
- 46  
47 15. Distiller. Distiller Systematic Review Software . Available at:  
48  
49 <https://www.evidencepartners.com/products/distillersr-systematic-review-software/>.  
50  
51 Accessed 08/25, 2020.  
52  
53
- 54  
55 16. Wolff RF, Moons KGM, Riley RD, et al. PROBAST: A Tool to Assess the Risk of Bias  
56  
57 and Applicability of Prediction Model Studies. *Ann Intern Med* 2019;170(1):51-58.  
58  
59  
60



- 1  
2  
3 17. Newcombe RG. Confidence intervals for an effect size measure based on the Mann-  
4  
5 Whitney statistic. Part 2: asymptotic methods and evaluation. *Stat Med* 2006;25(4):559-573.  
6  
7  
8  
9 18. Moretti C, D'Ascenzo F, Omedè P, et al. Thirty-day readmission rates after PCI in a  
10  
11 metropolitan center in Europe: incidence and impact on prognosis. *J Cardiovasc Med*  
12  
13 (Hagerstown) 2015;16(3):238-245.  
14  
15  
16  
17 19. Asche CV, Ren J, Kirkness CS, Kim M, Dong Y, Hippler S. A prediction model to  
18  
19 identify acute myocardial infarction (AMI) patients at risk for 30-day readmission. *SCSC:*  
20  
21 *Proceedings of the Summer Computer Simulation Conference* 2016;1:1-8.  
22  
23  
24 <https://dl.acm.org/doi/10.5555/3015574.3015575>.  
25  
26  
27  
28 20. Cediel G, Sandoval Y, Sexter A, et al. Risk Estimation in Type 2 Myocardial Infarction  
29  
30 and Myocardial Injury: The TARRACO Risk Score. *Am J Med* 2019;132(2):217-226.  
31  
32  
33  
34 21. Chotechuan Y, Phrommintikul A, Muenpa R, et al. The prognostic utility of GRACE  
35  
36 risk score in predictive cardiovascular event rate in STEMI patients with successful  
37  
38 fibrinolysis and delay intervention in non PCI-capable hospital: a retrospective cohort study.  
39  
40 *BMC Cardiovasc.Disord.* 2016;16(1):212. 10.1186/s12872-016-0383-3 [doi].  
41  
42  
43  
44 22. Hilbert JP, Zasadil S, Keyser DJ, Peele PB. Using decision trees to manage hospital  
45  
46 readmission risk for acute myocardial infarction, heart failure, and pneumonia. *Appl Health*  
47  
48 *Econ Health Policy* 2014;12(6):573-585.  
49  
50  
51  
52 23. Dodson JA, Hajduk AM, Murphy TE, et al. Thirty-Day Readmission Risk Model for  
53  
54 Older Adults Hospitalized With Acute Myocardial Infarction. *Circ Cardiovasc Qual*  
55  
56 *Outcomes* 2019;12(5):e005320. 10.1161/CIRCUOUTCOMES.118.005320 [doi].  
57  
58  
59  
60

- 1  
2  
3 24. Kini V, Peterson PN, Spertus JA, et al. Clinical Model to Predict 90-Day Risk of  
4  
5 Readmission After Acute Myocardial Infarction. *Circ Cardiovasc Qual Outcomes*  
6  
7 2018;11(10):e004788.  
8  
9  
10  
11 25. Nguyen OK, Makam AN, Clark C, Zhang S, Das SR, Halm EA. Predicting 30-Day  
12  
13 Hospital Readmissions in Acute Myocardial Infarction: The AMI "READMITS" (Renal  
14  
15 Function, Elevated Brain Natriuretic Peptide, Age, Diabetes Mellitus, Nonmale Sex,  
16  
17 Intervention with Timely Percutaneous Coronary Intervention, and Low Systolic Blood  
18  
19 Pressure) Score. *J Am Heart Assoc* 2018;7(8):e008882. doi: 10.1161/JAHA.118.008882.  
20  
21  
22  
23 26. Krumholz HM, Lin Z, Drye EE, et al. An administrative claims measure suitable for  
24  
25 profiling hospital performance based on 30-day all-cause readmission rates among patients  
26  
27 with acute myocardial infarction. *Circ Cardiovasc Qual Outcomes* 2011;4(2):243-252.  
28  
29  
30  
31 27. Rana S, Tran T, Luo W, Phung D, Kennedy RL, Venkatesh S. Predicting unplanned  
32  
33 readmission after myocardial infarction from routinely collected administrative hospital data.  
34  
35 *Aust Health Rev* 2014;38(4):377-382.  
36  
37  
38  
39 28. Atzema CL, Dorian P, Fang J, et al. A clinical decision instrument to predict 30-day death  
40  
41 and cardiovascular hospitalizations after an emergency department visit for atrial fibrillation:  
42  
43 The Atrial Fibrillation in the Emergency Room, Part 2 (AFTER2) study. *Am Heart J*  
44  
45 2018;203:85-92.  
46  
47  
48  
49 29. Lahewala S, Arora S, Patel P, et al. Atrial fibrillation: Utility of CHADS(2) and  
50  
51 CHA(2)DS(2)-VASc scores as predictors of readmission, mortality and resource utilization.  
52  
53 *Int J Cardiol* 2017;245:162-167.  
54  
55  
56  
57  
58  
59  
60

- 1  
2  
3 30. Benuzillo J, Caine W, Evans RS, Roberts C, Lappe D, Doty J. Predicting readmission risk  
4 shortly after admission for CABG surgery. *J Card Surg* 2018;33(4):163-170.  
5  
6  
7  
8  
9 31. Deo SV, Raza S, Altarabsheh SE, et al. Risk Calculator to Predict 30-Day Readmission  
10 After Coronary Artery Bypass: A Strategic Decision Support Tool. *Heart Lung Circ*  
11 2019;28(12):1896-1903.  
12  
13  
14  
15  
16  
17 32. Engoren M, Habib RH, Dooner JJ, Schwann TA. Use of genetic programming, logistic  
18 regression, and artificial neural nets to predict readmission after coronary artery bypass  
19 surgery. *J Clin Monit Comput* 2013;27(4):455-464.  
20  
21  
22  
23  
24  
25 33. Lancey R, Kurlansky P, Argenziano M, et al. Uniform standards do not apply to  
26 readmission following coronary artery bypass surgery: a multi-institutional study. *J Thorac*  
27 *Cardiovasc Surg* 2015;149(3):850-7.e1; discussion 857.  
28  
29  
30  
31  
32  
33 34. Rosenblum JM, Lovasik BP, Hunting JC, et al. Predicted Risk of Mortality Score predicts  
34 30-day readmission after coronary artery bypass grafting. *Gen Thorac Cardiovasc Surg*  
35 2019;67(8):661-668.  
36  
37  
38  
39  
40  
41 35. Zitser-Gurevich Y, Simchen E, Galai N, Braun D. Prediction of readmissions after CABG  
42 using detailed follow-up data: the Israeli CABG Study (ISCAB). *Med Care* 1999;37(7):625-  
43 636.  
44  
45  
46  
47  
48  
49 36. Zywtot A, Lau CSM, Glass N, et al. Preoperative Scale to Determine All-Cause  
50 Readmission After Coronary Artery Bypass Operations. *Ann Thorac Surg* 2018;105(4):1086-  
51 1093.  
52  
53  
54  
55  
56  
57 37. Ahmad FS, French B, Bowles KH, et al. Incorporating patient-centered factors into heart  
58 failure readmission risk prediction: A mixed-methods study. *Am Heart J* 2018;200:75-82.  
59  
60

- 1  
2  
3 38. Amarasingham R, Moore BJ, Tabak YP, et al. An automated model to identify heart  
4 failure patients at risk for 30-day readmission or death using electronic medical record data.  
5  
6 Med Care 2010;48(11):981-988.  
7  
8  
9  
10  
11 39. Au AG, McAlister FA, Bakal JA, Ezekowitz J, Kaul P, van Walraven C. Predicting the  
12 risk of unplanned readmission or death within 30 days of discharge after a heart failure  
13 hospitalization. Am Heart J 2012;164(3):365-372.  
14  
15  
16  
17  
18  
19 40. Bardhan I, Oh J, Zhiqiang Z, Kirksey K. Predictive Analytics for Readmission of Patients  
20 with Congestive Heart Failure. Information Systems Research 2015;26(1):19-39.  
21  
22  
23  
24  
25 41. Betihavas V, Frost SA, Newton PJ, et al. An Absolute Risk Prediction Model to  
26 Determine Unplanned Cardiovascular Readmissions for Adults with Chronic Heart Failure.  
27 Heart Lung Circ 2015;24(11):1068-1073.  
28  
29  
30  
31  
32  
33 42. Cox ZL, Lai P, Lewis CM, Lindenfeld J, Collins SP, Lenihan DJ. Customizing national  
34 models for a medical center's population to rapidly identify patients at high risk of 30-day all-  
35 cause hospital readmission following a heart failure hospitalization. Heart Lung  
36  
37 2018;47(4):290-296.  
38  
39  
40  
41  
42  
43 43. Delgado JF, Ferrero Gregori A, Fernández LM, et al. Patient-Associated Predictors of 15-  
44 and 30-Day Readmission After Hospitalization for Acute Heart Failure. Curr Heart Fail Rep  
45  
46 2019;16(6):304-314.  
47  
48  
49  
50  
51 44. Formiga F, Masip J, Chivite D, Corbella X. Applicability of the heart failure Readmission  
52 Risk score: A first European study. Int J Cardiol 2017;236:304-309.  
53  
54  
55  
56  
57  
58  
59  
60

- 1  
2  
3 45. Frizzell JD, Liang L, Schulte PJ, et al. Prediction of 30-Day All-Cause Readmissions in  
4 Patients Hospitalized for Heart Failure: Comparison of Machine Learning and Other  
5 Statistical Approaches. *JAMA Cardiol* 2017;2(2):204-209.  
6  
7  
8  
9  
10  
11 46. Hammill BG, Curtis LH, Fonarow GC, et al. Incremental value of clinical data beyond  
12 claims data in predicting 30-day outcomes after heart failure hospitalization. *Circ Cardiovasc*  
13 *Qual Outcomes* 2011;4(1):60-67.  
14  
15  
16  
17  
18  
19 47. Hummel SL, Katrapati P, Gillespie BW, Defranco AC, Koelling TM. Impact of prior  
20 admissions on 30-day readmissions in medicare heart failure inpatients. *Mayo Clin Proc*  
21 *2014;89(5):623-630.*  
22  
23  
24  
25  
26  
27 48. Huynh Q, Negishi K, De Pasquale CG, et al. Validation of Predictive Score of 30-Day  
28 Hospital Readmission or Death in Patients With Heart Failure. *Am J Cardiol*  
29 *2018;121(3):322-329.*  
30  
31  
32  
33  
34  
35 49. Ibrahim AM, Koester C, Al-Akchar M, et al. HOSPITAL Score, LACE Index and  
36 LACE+ Index as predictors of 30-day readmission in patients with heart failure. *BMJ Evid*  
37 *Based Med* 2019.  
38  
39  
40  
41  
42  
43 50. Keenan PS, Normand SL, Lin Z, et al. An administrative claims measure suitable for  
44 profiling hospital performance on the basis of 30-day all-cause readmission rates among  
45 patients with heart failure. *Circ Cardiovasc Qual Outcomes* 2008;1(1):29-37.  
46  
47  
48  
49  
50  
51 51. Kitamura M, Izawa KP, Taniue H, et al. Relationship between Activities of Daily Living  
52 and Readmission within 90 Days in Hospitalized Elderly Patients with Heart Failure. *Biomed*  
53 *Res Int* 2017;2017:7420738.  
54  
55  
56  
57  
58  
59  
60

- 1  
2  
3 52. Leong KT, Wong LY, Aung KC, et al. Risk Stratification Model for 30-Day Heart Failure  
4 Readmission in a Multiethnic South East Asian Community. *Am J Cardiol*  
5  
6 2017;119(9):1428-1432.  
7  
8  
9  
10  
11 53. Li L, Baek J, Jesdale BM, et al. Predicting 30-day mortality and 30-day re-hospitalization  
12 risks in Medicare patients with heart failure discharged to skilled nursing facilities:  
13 development and validation of models using administrative data. *The Journal of Nursing*  
14  
15  
16  
17  
18 Home Research 2019;5:60-67.  
19  
20  
21 54. Lim NK, Lee SE, Lee HY, et al. Risk prediction for 30-day heart failure-specific  
22 readmission or death after discharge: Data from the Korean Acute Heart Failure (KorAHF)  
23 registry. *J Cardiol* 2019;73(2):108-113.  
24  
25  
26  
27  
28  
29 55. Reed J, Bokovoy J, Doram K. Unplanned readmissions after hospital discharge among  
30 heart failure patients at risk for 30-day readmission using an administrative dataset and “off  
31 the shelf” readmission models. *Internet J Cardiovasc Res* 2014;9(1):2020-07-15.  
32  
33  
34  
35  
36  
37 56. Salah K, Kok WE, Eurlings LW, et al. A novel discharge risk model for patients  
38 hospitalised for acute decompensated heart failure incorporating N-terminal pro-B-type  
39 natriuretic peptide levels: a European coLLaboration on Acute decompensated Heart Failure:  
40 ELAN-HF Score. *Heart* 2014;100(2):115-125.  
41  
42  
43  
44  
45  
46  
47 57. Sudhakar S, Zhang W, Kuo YF, Alghrouz M, Barbajelata A, Sharma G. Validation of the  
48 Readmission Risk Score in Heart Failure Patients at a Tertiary Hospital. *J Card Fail*  
49  
50  
51  
52  
53 2015;21(11):885-891.  
54  
55  
56  
57  
58  
59  
60

- 1  
2  
3 58. Tan BY, Gu JY, Wei HY, Chen L, Yan SL, Deng N. Electronic medical record-based  
4 model to predict the risk of 90-day readmission for patients with heart failure. *BMC Med*  
5  
6 *Inform Decis Mak* 2019;19(1):193-019-0915-8.  
7  
8  
9  
10  
11 59. Wang LE, Shaw PA, Mathelier HM, Kimmel SE, French B. Evaluating Risk-Prediction  
12 Models using Data from Electronic Health Records. *Ann Appl Stat* 2016;10(1):286-304.  
13  
14  
15  
16  
17 60. Wang H, Robinson RD, Johnson C, et al. Using the LACE index to predict hospital  
18 readmissions in congestive heart failure patients. *BMC Cardiovasc Disord* 2014;14:97-2261-  
19 14-97.  
20  
21  
22  
23  
24  
25 61. Yazdan-Ashoori P, Lee SF, Ibrahim Q, Van Spall HG. Utility of the LACE index at the  
26 bedside in predicting 30-day readmission or death in patients hospitalized with heart failure.  
27 *Am Heart J* 2016;179:51-58.  
28  
29  
30  
31  
32  
33 62. Disdier Moulder MP, Larock JM, Garofoli A, Foley DA. Family Help With Medication  
34 Management: A Predictive Marker for Early Readmission. *Mayo Clin Proc Innov Qual*  
35 *Outcomes* 2017;1(3):211-218.  
36  
37  
38  
39  
40  
41 63. Raposeiras-Roubín S, Abu-Assi E, Cambeiro-González C, et al. Mortality and  
42 cardiovascular morbidity within 30 days of discharge following acute coronary syndrome in a  
43 contemporary European cohort of patients: How can early risk prediction be improved? The  
44 six-month GRACE risk score. *Rev Port Cardiol* 2015;34(6):383-391.  
45  
46  
47  
48  
49  
50  
51 64. Burke RE, Schnipper JL, Williams MV, et al. The HOSPITAL Score Predicts Potentially  
52 Preventable 30-Day Readmissions in Conditions Targeted by the Hospital Readmissions  
53 Reduction Program. *Med Care* 2017;55(3):285-290.  
54  
55  
56  
57  
58  
59  
60

1  
2  
3 65. Minges KE, Herrin J, Fiorilli PN, Curtis JP. Development and validation of a simple risk  
4 score to predict 30-day readmission after percutaneous coronary intervention in a cohort of  
5 medicare patients. *Catheter Cardiovasc Interv* 2017;89(6):955-963.  
6  
7

8  
9  
10  
11 66. Pack QR, Priya A, Lagu T, et al. Development and Validation of a Predictive Model for  
12 Short- and Medium-Term Hospital Readmission Following Heart Valve Surgery. *J Am Heart*  
13 *Assoc* 2016;5(9):e003544. doi: 10.1161/JAHA.116.003544.  
14  
15

16  
17  
18  
19 67. Oliver-McNeil S, Templin TN, Haines DE. Preoperative ICD risk score variables predict  
20 30-day readmission after implantable cardioverter defibrillator implantation in patients with  
21 heart failure. *Heart Lung* 2016;45(1):29-33.  
22  
23

24  
25  
26  
27 68. Wasfy JH, Rosenfield K, Zelevinsky K, et al. A prediction model to identify patients at  
28 high risk for 30-day readmission after percutaneous coronary intervention. *Circ Cardiovasc*  
29 *Qual Outcomes* 2013;6(4):429-435.  
30  
31

32  
33  
34  
35 69. Barnett SD, Sarin E, Kiser AC, et al. Examination of a Proposed 30-day Readmission  
36 Risk Score on Discharge Location and Cost. *Ann Thorac Surg* 2020;109(6):1797-1803.  
37  
38

39  
40  
41 70. Brown JR, Jacobs JP, Alam SS, et al. Utility of Biomarkers to Improve Prediction of  
42 Readmission or Mortality After Cardiac Surgery. *Ann Thorac Surg* 2018;106(5):1294-1301.  
43  
44

45  
46  
47 71. Espinoza J, Camporrontondo M, Vrancic M, et al. 30-day readmission score after cardiac  
48 surgery. *Clin. Trials Regul. Sci. Cardio* 2016;20:2020-07-15.  
49

50  
51 <https://doi.org/10.1016/j.ctrsc.2016.05.006>.  
52

53  
54  
55 72. Ferraris VA, Ferraris SP, Harmon RC, Evans BD. Risk factors for early hospital  
56 readmission after cardiac operations. *J Thorac Cardiovasc Surg* 2001;122(2):278-286.  
57  
58



- 1  
2  
3 73. Kilic A, Magruder JT, Grimm JC, et al. Development and Validation of a Score to Predict  
4 the Risk of Readmission After Adult Cardiac Operations. *Ann Thorac Surg* 2017;103(1):66-  
5  
6  
7  
8 73.  
9  
10  
11 74. Stuebe J, Rydingsward J, Lander H, et al. A Pragmatic Preoperative Prediction Score for  
12 Nonhome Discharge After Cardiac Operations. *Ann Thorac Surg* 2018;105(5):1384-1391.  
13  
14  
15  
16  
17 75. Tam DY, Fang J, Tran A, et al. A Clinical Risk Scoring Tool to Predict Readmission  
18 After Cardiac Surgery: An Ontario Administrative and Clinical Population Database Study.  
19 *Can J Cardiol* 2018;34(12):1655-1664.  
20  
21  
22  
23  
24  
25 76. Khera S, Kolte D, Deo S, et al. Derivation and external validation of a simple risk tool to  
26 predict 30-day hospital readmissions after transcatheter aortic valve replacement.  
27 *EuroIntervention* 2019;15(2):155-163.  
28  
29  
30  
31  
32  
33 77. Sanchez CE, Hermiller JB, Jr, Pinto DS, et al. Predictors and Risk Calculator of Early  
34 Unplanned Hospital Readmission Following Contemporary Self-Expanding Transcatheter  
35 Aortic Valve Replacement from the STS/ACC TVT Registry. *Cardiovasc Revasc Med*  
36  
37  
38  
39  
40  
41  
42  
43 78. Kerr KF, Pepe MS. Joint modeling, covariate adjustment, and interaction: contrasting  
44 notions in risk prediction models and risk prediction performance. *Epidemiology*  
45  
46  
47  
48  
49  
50  
51 79. Jordan K, Moons K. Electronic healthcare records and prognosis research. In: Riley R,  
52 van der Windt D, Croft P, Moons K, editors. *Prognosis research in healthcare. Concepts,*  
53  
54  
55  
56  
57  
58  
59  
60

1  
2  
3 80. Collins G, Reitsma J, Altman D, Moons K. Transparent reporting of a multivariable  
4 prediction model for individual prognosis or diagnosis (TRIPOD): The TRIPOD statement.  
5  
6 2020; Available at: <https://www.equator-network.org/reporting-guidelines/tripod-statement/>.  
7  
8  
9  
10 Accessed 08/20, 2020.  
11  
12  
13  
14  
15  
16  
17  
18  
19  
20  
21  
22  
23  
24  
25  
26  
27  
28  
29  
30  
31  
32  
33  
34  
35  
36  
37  
38  
39  
40  
41  
42  
43  
44  
45  
46  
47  
48  
49  
50  
51  
52  
53  
54  
55  
56  
57  
58  
59  
60

For peer review only

## Figure legends

### Figure 1. Flowchart

In total, 8592 records were screened and 60 studies with 81 prediction models were included.

### Figure 2. PROBAST Risk of bias and applicability

The PROBAST tool<sup>16</sup> was used to assess the risk of bias for the participants, predictors, outcome and analysis for each model. Only one study demonstrated low risk of bias on all domains.

### Figure 3. Meta-analysis of prediction models

Random-effect models were used to pool similar models reported in independent cohorts. For the HOSPITAL score, the discrimination for the HF and AMI samples were similar (0.65 and 0.64). For GRACE, the discrimination for the AMI and reinfarction samples were similar (0.77 and 0.74), and was higher for the HF sample (0.83). Only GRACE demonstrated adequate discrimination in external cohorts.

### Figure 4. Predictors of unplanned hospital readmission

The plot provides an overview of the random-effects meta-analyses that were performed for predictors who were similarly defined for the outcome unplanned hospital readmission at 30 days follow-up. See Supplemental table 2A and Supplemental figures 9-26 for more details.

1  
2  
3  
4  
5  
6  
7  
8  
9  
10  
11  
12  
13  
14  
15  
16  
17  
18  
19  
20  
21  
22  
23  
24  
25  
26  
27  
28  
29  
30  
31  
32  
33  
34  
35  
36  
37  
38  
39  
40  
41  
42  
43  
44  
45  
46  
47  
48  
49  
50  
51  
52  
53  
54  
55  
56  
57  
58  
59  
60

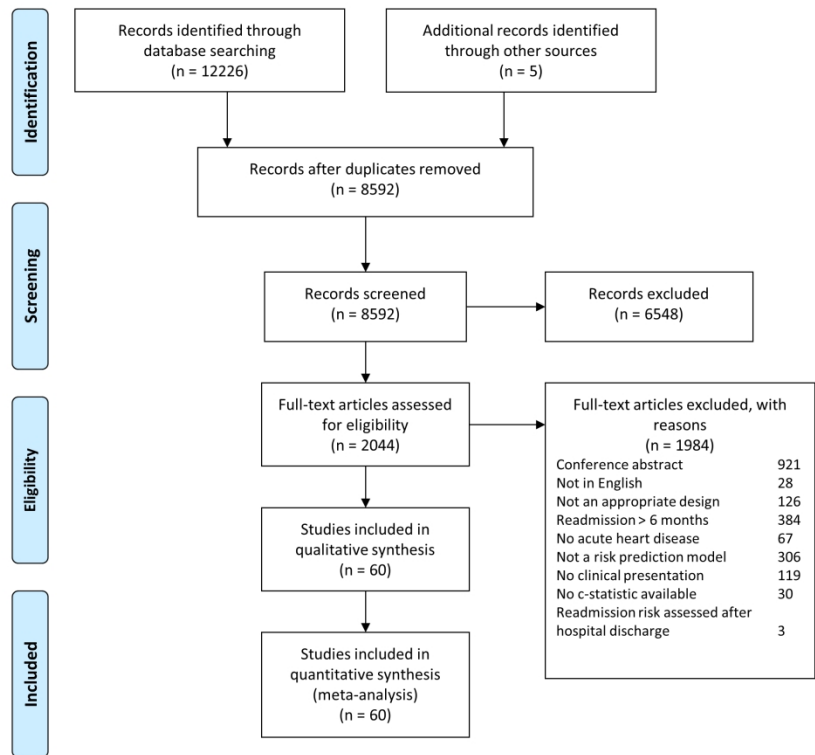

Flowchart  
In total, 8592 records were screened and 60 studies with 81 prediction models were included.

190x275mm (300 x 300 DPI)

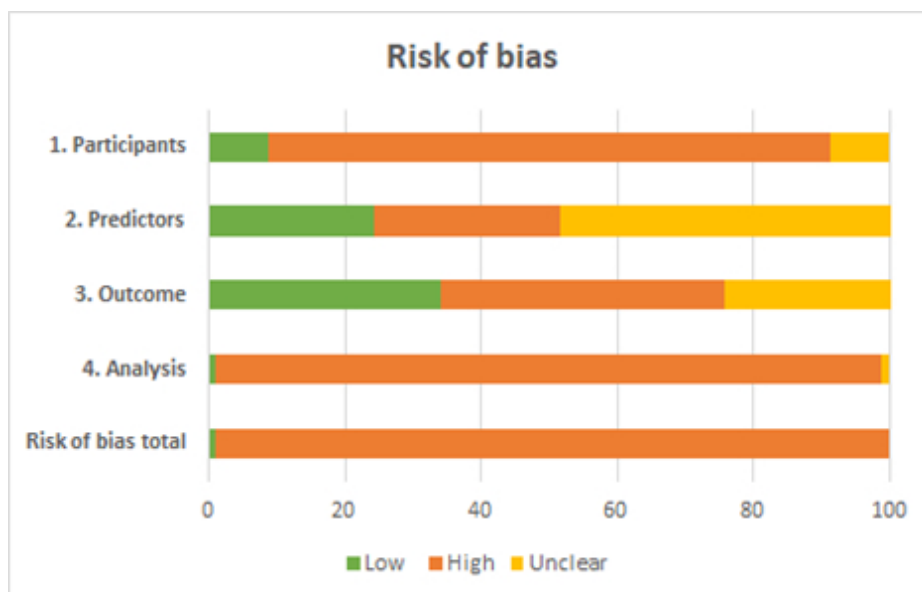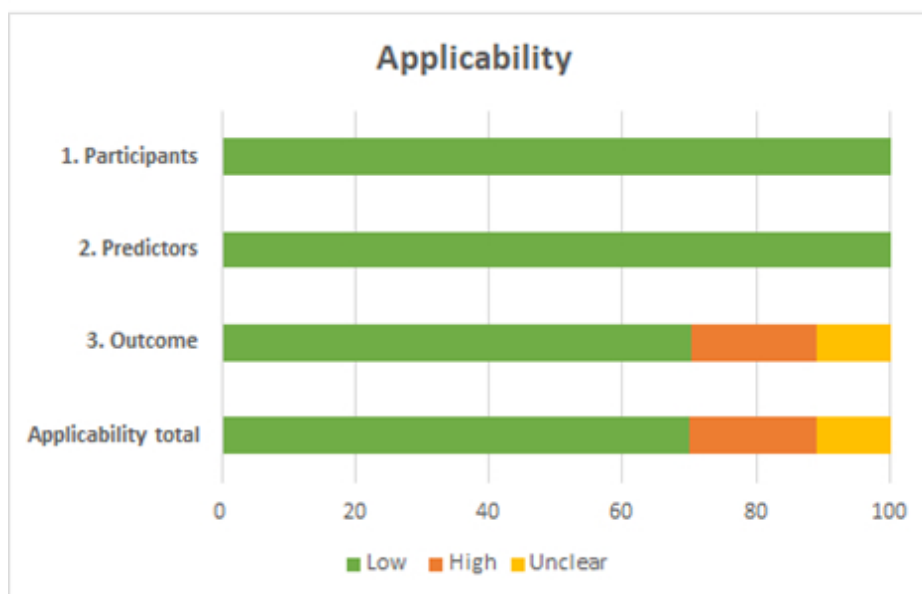

PROBAST Risk of bias and applicability

The PROBAST tool<sup>15</sup> was used to assess the risk of bias for the participants, predictors, outcome and analysis for each model. Only one study demonstrated low risk of bias on all domains.

39x51mm (300 x 300 DPI)

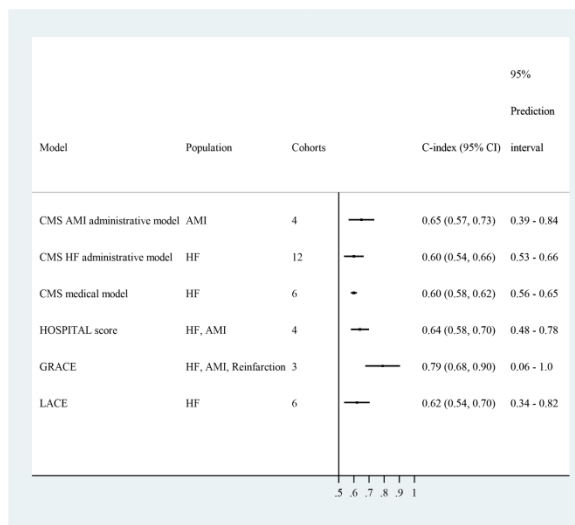

#### Meta-analysis of prediction models

Random-effect models were used to pool similar models reported in independent cohorts. For the HOSPITAL score, the discrimination for the HF and AMI samples were similar (0.65 and 0.64). For GRACE, the discrimination for the AMI and reinfarction samples were similar (0.77 and 0.74), and was higher for the HF sample (0.83). Only GRACE demonstrated adequate discrimination in external cohorts.

338x190mm (300 x 300 DPI)

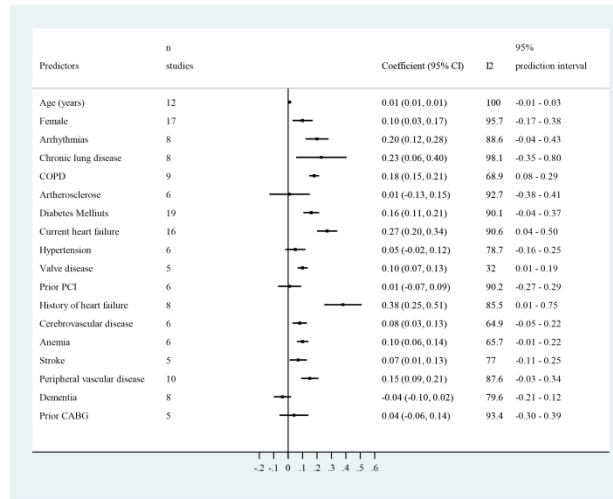

Predictors of unplanned hospital readmissionThe plot provides an overview of the random-effects meta-analyses that were performed for predictors who were similarly defined for the outcome unplanned hospital readmission at 30 days follow-up. See Supplemental table 2A and Supplemental figures 9-26 for more details.

338x190mm (300 x 300 DPI)

## Supplemental materials

Supplemental Text 1. Search string

Supplemental Text 2. Data items

Supplemental Table 1A. Risk of bias

Supplemental Figure 1. Meta-analysis of CMS AMI administrative model

Supplemental Figure 2. Meta-analysis of CMS HF administrative model

Supplemental Figure 3. Meta-analysis of CMS medical model

Supplemental Figure 4. Meta-analysis of HOSPITAL score

Supplemental Figure 5. Meta-analysis of GRACE

Supplemental Figure 6. Meta-analysis of LACE

Supplemental Figure 7. Age as moderator

Supplemental Figure 8. Number of predictors as moderator

Supplemental Table 1B. Subgroup analyses

Supplemental Table 2A. Summary of meta-analyses predictors

Supplemental Figure 9. Age as predictor

Supplemental Figure 10. Female as predictor

Supplemental Figure 11. Arrhythmias as predictor

Supplemental Figure 12. Chronic lung disease as predictor

Supplemental Figure 13. Chronic Obstructive Pulmonary Disease as predictor

Supplemental Figure 14. Atherosclerosis as predictor

Supplemental Figure 15. Diabetes Mellitus as predictor

Supplemental Figure 16. Current heart failure as predictor

Supplemental Figure 17. Hypertension as predictor

Supplemental Figure 18. Valve disease as predictor

Supplemental Figure 19. Prior percutaneous coronary intervention as predictor

Supplemental Figure 20. History of heart failure as predictor

Supplemental Figure 21. Cerebrovascular disease as predictor

Supplemental Figure 22. Anemia as predictor

Supplemental Figure 23. Stroke as predictor

Supplemental Figure 24. Peripheral vascular disease as predictor

Supplemental Figure 25. Dementia as predictor

Supplemental Figure 26. Prior Coronary Artery Bypass Graft as predictor



## Supplemental Text 1. Search string

Ovid MEDLINE(R) ALL 1946 to November 21, 2019

Search date: 25 August 2020

| #  | Searches                                                                                                                                                                                                                                                                                                                                                                                                                                                                                                                                                                                                                                                                                                                                                                                                                                                                                                                                                                                                                                                                                                                                                                                                                                     | Results |
|----|----------------------------------------------------------------------------------------------------------------------------------------------------------------------------------------------------------------------------------------------------------------------------------------------------------------------------------------------------------------------------------------------------------------------------------------------------------------------------------------------------------------------------------------------------------------------------------------------------------------------------------------------------------------------------------------------------------------------------------------------------------------------------------------------------------------------------------------------------------------------------------------------------------------------------------------------------------------------------------------------------------------------------------------------------------------------------------------------------------------------------------------------------------------------------------------------------------------------------------------------|---------|
| 1  | exp "predictive value of tests"/ or roc curve/ or exp Decision Support Techniques/                                                                                                                                                                                                                                                                                                                                                                                                                                                                                                                                                                                                                                                                                                                                                                                                                                                                                                                                                                                                                                                                                                                                                           | 321482  |
| 2  | ("signal to noise" or roc curve or reiver operating or predict*).ab,kf,ti.                                                                                                                                                                                                                                                                                                                                                                                                                                                                                                                                                                                                                                                                                                                                                                                                                                                                                                                                                                                                                                                                                                                                                                   | 1644590 |
| 3  | (decision adj2 (aid? or model* or clinical* or support or system? or tool?)).ab,kf,ti.                                                                                                                                                                                                                                                                                                                                                                                                                                                                                                                                                                                                                                                                                                                                                                                                                                                                                                                                                                                                                                                                                                                                                       | 56262   |
| 4  | decision?.ab,kf,ti.                                                                                                                                                                                                                                                                                                                                                                                                                                                                                                                                                                                                                                                                                                                                                                                                                                                                                                                                                                                                                                                                                                                                                                                                                          | 381353  |
| 5  | logistic models/                                                                                                                                                                                                                                                                                                                                                                                                                                                                                                                                                                                                                                                                                                                                                                                                                                                                                                                                                                                                                                                                                                                                                                                                                             | 139814  |
| 6  | (logistic model* or regression).ab,kf,ti.                                                                                                                                                                                                                                                                                                                                                                                                                                                                                                                                                                                                                                                                                                                                                                                                                                                                                                                                                                                                                                                                                                                                                                                                    | 758909  |
| 7  | 5 or 6                                                                                                                                                                                                                                                                                                                                                                                                                                                                                                                                                                                                                                                                                                                                                                                                                                                                                                                                                                                                                                                                                                                                                                                                                                       | 814876  |
| 8  | 4 and 7                                                                                                                                                                                                                                                                                                                                                                                                                                                                                                                                                                                                                                                                                                                                                                                                                                                                                                                                                                                                                                                                                                                                                                                                                                      | 23040   |
| 9  | or/1-3,8                                                                                                                                                                                                                                                                                                                                                                                                                                                                                                                                                                                                                                                                                                                                                                                                                                                                                                                                                                                                                                                                                                                                                                                                                                     | 1861041 |
| 10 | patient readmission/                                                                                                                                                                                                                                                                                                                                                                                                                                                                                                                                                                                                                                                                                                                                                                                                                                                                                                                                                                                                                                                                                                                                                                                                                         | 17534   |
| 11 | ((readmission or readmitted or re-admission or re-admitted) and (hospital* or prehospital*)).ab,kf,ti.                                                                                                                                                                                                                                                                                                                                                                                                                                                                                                                                                                                                                                                                                                                                                                                                                                                                                                                                                                                                                                                                                                                                       | 20747   |
| 12 | ((readmission or readmitted or re-admission or re-admitted) adj2 (patient? or client)).ab,kf,ti.                                                                                                                                                                                                                                                                                                                                                                                                                                                                                                                                                                                                                                                                                                                                                                                                                                                                                                                                                                                                                                                                                                                                             | 4515    |
| 13 | (rehospitali?ation? or re-hospitali?ation? or rehospitali?ed or re-hospitali?ed).ab,kf,ti.                                                                                                                                                                                                                                                                                                                                                                                                                                                                                                                                                                                                                                                                                                                                                                                                                                                                                                                                                                                                                                                                                                                                                   | 7834    |
| 14 | or/10-13                                                                                                                                                                                                                                                                                                                                                                                                                                                                                                                                                                                                                                                                                                                                                                                                                                                                                                                                                                                                                                                                                                                                                                                                                                     | 35723   |
| 15 | exp cardiovascular system/ or exp cardiovascular diseases/                                                                                                                                                                                                                                                                                                                                                                                                                                                                                                                                                                                                                                                                                                                                                                                                                                                                                                                                                                                                                                                                                                                                                                                   | 3001695 |
| 16 | (cardiac* or cardio* or myocard* or coronary or heart).ab,jw,kf,ti.                                                                                                                                                                                                                                                                                                                                                                                                                                                                                                                                                                                                                                                                                                                                                                                                                                                                                                                                                                                                                                                                                                                                                                          | 2161260 |
| 17 | (diastolic or systolic or edema or dyspnea or renocardiac or Stenocardia* or angor or angina* or atheroscleros* or atheroscleros* or arteroscleros* or Arterioscleros* or Kounis syndrome or ST elevation or STEMI or valve* or aortic or stenosis or Leopard Syndrome or Noonan Syndrome with Multiple Lentigines or Multiple Lentigines Syndrome or Obstructive Subaortic Conus or Absent Right Atrioventricular Connection or arrhythmia* or sinus or sinoatrial or atria* or auricular or atrioventricular or ventricular or bradycardia or Bradyarrhythmia* or tachycardia* or fibrillation* or flutter* or Right Bundle Branch Block or Brugada or extrasystole* or (commotion adj1 cordis) or Auriculo-Ventricular Dissociation or Auriculo Ventricular Dissociation or Atrioventricular Dissociation or A-V Dissociation or AV Dissociation or syncope or (Andersen adj2 Tawil) or QT Syndrome or (jervell adj2 lange) or Prolonged QT Interval or (romano adj1 ward) or parasystole or Pre-Excitation or Preexcitation or (Lown adj2 Ganong) or Short PR-Normal QRS Complex Syndrome or Short PR Normal QRS Complex Syndrome or Wolff-Parkinson-White or WPW Syndrome or Idioventricular Rhythm or Torsade de Pointes).ab,hw,kf,ti. | 1642025 |
| 18 | or/15-17                                                                                                                                                                                                                                                                                                                                                                                                                                                                                                                                                                                                                                                                                                                                                                                                                                                                                                                                                                                                                                                                                                                                                                                                                                     | 4136701 |
| 19 | (predict* adj3 risk?).ab,kf,ti.                                                                                                                                                                                                                                                                                                                                                                                                                                                                                                                                                                                                                                                                                                                                                                                                                                                                                                                                                                                                                                                                                                                                                                                                              | 57669   |
| 20 | retrospective.ab,hw,kf,ti.                                                                                                                                                                                                                                                                                                                                                                                                                                                                                                                                                                                                                                                                                                                                                                                                                                                                                                                                                                                                                                                                                                                                                                                                                   | 1006259 |
| 21 | (admission or hospitali?ation or discharge).ab,hw,kf,ti.                                                                                                                                                                                                                                                                                                                                                                                                                                                                                                                                                                                                                                                                                                                                                                                                                                                                                                                                                                                                                                                                                                                                                                                     | 529444  |
| 22 | and/18-21                                                                                                                                                                                                                                                                                                                                                                                                                                                                                                                                                                                                                                                                                                                                                                                                                                                                                                                                                                                                                                                                                                                                                                                                                                    | 692     |
| 23 | and/9,14,18                                                                                                                                                                                                                                                                                                                                                                                                                                                                                                                                                                                                                                                                                                                                                                                                                                                                                                                                                                                                                                                                                                                                                                                                                                  | 3482    |
| 24 | (ISRCTN96643197 or ChiCTR1900026250 or NCT04008914 or NCT03791541 or NCT03300791 or "CTRI/2016/10/007411" or "CTRI/2014/06/004690" or NCT03949439 or NCT03905226 or NCT00344513 or NCT01755052 or NCT02041585).ab,kf,ti.                                                                                                                                                                                                                                                                                                                                                                                                                                                                                                                                                                                                                                                                                                                                                                                                                                                                                                                                                                                                                     | 9       |
| 25 | ((OPERA or REIC or FigARO or PREDIC or optimize-hf or ten-hms or tele-hf or readmits or silver-ami or dc promis or KorAHF) adj3 (trial or study)).ab,kf,ti.                                                                                                                                                                                                                                                                                                                                                                                                                                                                                                                                                                                                                                                                                                                                                                                                                                                                                                                                                                                                                                                                                  | 118     |
| 26 | or/22-25                                                                                                                                                                                                                                                                                                                                                                                                                                                                                                                                                                                                                                                                                                                                                                                                                                                                                                                                                                                                                                                                                                                                                                                                                                     | 4209    |

**Ovid Embase Classic+Embase <1947 to 2020 August 24>  
Search date: 25 August 2020**

| #  | Searches                                                                                                                                                                                                                                                                                                                                                                                                                                                                                                                                                                                                                                                                                                                                                                                                                                                                                                                                                                                                                                                                                                                                                                                                                                     | Results |
|----|----------------------------------------------------------------------------------------------------------------------------------------------------------------------------------------------------------------------------------------------------------------------------------------------------------------------------------------------------------------------------------------------------------------------------------------------------------------------------------------------------------------------------------------------------------------------------------------------------------------------------------------------------------------------------------------------------------------------------------------------------------------------------------------------------------------------------------------------------------------------------------------------------------------------------------------------------------------------------------------------------------------------------------------------------------------------------------------------------------------------------------------------------------------------------------------------------------------------------------------------|---------|
| 1  | *predictive value/ or *receiver operating characteristic/ or exp *Decision Support system/                                                                                                                                                                                                                                                                                                                                                                                                                                                                                                                                                                                                                                                                                                                                                                                                                                                                                                                                                                                                                                                                                                                                                   | 21786   |
| 2  | ("signal to noise" or roc curve or reiver operating or predict*).ab,kw,ti.                                                                                                                                                                                                                                                                                                                                                                                                                                                                                                                                                                                                                                                                                                                                                                                                                                                                                                                                                                                                                                                                                                                                                                   | 2224346 |
| 3  | (decision adj2 (aid? or model* or clinical* or support or system? or tool?)).ab,kw,ti.                                                                                                                                                                                                                                                                                                                                                                                                                                                                                                                                                                                                                                                                                                                                                                                                                                                                                                                                                                                                                                                                                                                                                       | 80866   |
| 4  | decision?.ab,kw,ti.                                                                                                                                                                                                                                                                                                                                                                                                                                                                                                                                                                                                                                                                                                                                                                                                                                                                                                                                                                                                                                                                                                                                                                                                                          | 531706  |
| 5  | *logistic regression analysis/                                                                                                                                                                                                                                                                                                                                                                                                                                                                                                                                                                                                                                                                                                                                                                                                                                                                                                                                                                                                                                                                                                                                                                                                               | 1018    |
| 6  | (logistic model* or regression).ab,kw,ti.                                                                                                                                                                                                                                                                                                                                                                                                                                                                                                                                                                                                                                                                                                                                                                                                                                                                                                                                                                                                                                                                                                                                                                                                    | 1107281 |
| 7  | 5 or 6                                                                                                                                                                                                                                                                                                                                                                                                                                                                                                                                                                                                                                                                                                                                                                                                                                                                                                                                                                                                                                                                                                                                                                                                                                       | 1107307 |
| 8  | 4 and 7                                                                                                                                                                                                                                                                                                                                                                                                                                                                                                                                                                                                                                                                                                                                                                                                                                                                                                                                                                                                                                                                                                                                                                                                                                      | 33059   |
| 9  | or/1-3,8                                                                                                                                                                                                                                                                                                                                                                                                                                                                                                                                                                                                                                                                                                                                                                                                                                                                                                                                                                                                                                                                                                                                                                                                                                     | 2305864 |
| 10 | *hospital readmission/                                                                                                                                                                                                                                                                                                                                                                                                                                                                                                                                                                                                                                                                                                                                                                                                                                                                                                                                                                                                                                                                                                                                                                                                                       | 13570   |
| 11 | ((readmission or readmitted or re-admission or re-admitted) and (hospital* or prehospita*)).ab,kw,ti.                                                                                                                                                                                                                                                                                                                                                                                                                                                                                                                                                                                                                                                                                                                                                                                                                                                                                                                                                                                                                                                                                                                                        | 39681   |
| 12 | ((readmission or readmitted or re-admission or re-admitted) adj2 (patient? or client)).ab,kw,ti.                                                                                                                                                                                                                                                                                                                                                                                                                                                                                                                                                                                                                                                                                                                                                                                                                                                                                                                                                                                                                                                                                                                                             | 9596    |
| 13 | (rehospitali?ation? or re-hospitali?ation? or rehospitali?ed or re-hospitali?ed).ab,kw,ti.                                                                                                                                                                                                                                                                                                                                                                                                                                                                                                                                                                                                                                                                                                                                                                                                                                                                                                                                                                                                                                                                                                                                                   | 14392   |
| 14 | or/10-13                                                                                                                                                                                                                                                                                                                                                                                                                                                                                                                                                                                                                                                                                                                                                                                                                                                                                                                                                                                                                                                                                                                                                                                                                                     | 56536   |
| 15 | exp *cardiovascular system/                                                                                                                                                                                                                                                                                                                                                                                                                                                                                                                                                                                                                                                                                                                                                                                                                                                                                                                                                                                                                                                                                                                                                                                                                  | 630584  |
| 16 | (cardiac* or cardio* or myocard* or coronary or heart).ab,jw,kw,ti.                                                                                                                                                                                                                                                                                                                                                                                                                                                                                                                                                                                                                                                                                                                                                                                                                                                                                                                                                                                                                                                                                                                                                                          | 3123455 |
| 17 | (diastolic or systolic or edema or dyspnea or renocardiac or Stenocardia* or angor or angina* or atheroscleros* or atheroscleros* or arteroscleros* or Arterioscleros* or Kounis syndrome or ST elevation or STEMI or valve* or aortic or stenosis or Leopard Syndrome or Noonan Syndrome with Multiple Lentiginos or Multiple Lentiginos Syndrome or Obstructive Subaortic Conus or Absent Right Atrioventricular Connection or arrhythmia* or sinus or sinoatrial or atria* or auricular or atrioventricular or ventricular or bradycardia or Bradyarrhythmia* or tachycardia* or fibrillation* or flutter* or Right Bundle Branch Block or Brugada or extrasystole* or (commotion adj1 cordis) or Auriculo-Ventricular Dissociation or Auriculo Ventricular Dissociation or Atrioventricular Dissociation or A-V Dissociation or AV Dissociation or syncope or (Andersen adj2 Tawil) or QT Syndrome or (jervell adj2 lange) or Prolonged QT Interval or (romano adj1 ward) or parasystole or Pre-Excitation or Preexcitation or (Lown adj2 Ganong) or Short PR-Normal QRS Complex Syndrome or Short PR Normal QRS Complex Syndrome or Wolff-Parkinson-White or WPW Syndrome or Idioventricular Rhythm or Torsade de Pointes).ab,hw,kw,ti. | 2756334 |
| 18 | or/15-17                                                                                                                                                                                                                                                                                                                                                                                                                                                                                                                                                                                                                                                                                                                                                                                                                                                                                                                                                                                                                                                                                                                                                                                                                                     | 4713190 |
| 19 | (predict* adj3 risk?).ab,kw,ti.                                                                                                                                                                                                                                                                                                                                                                                                                                                                                                                                                                                                                                                                                                                                                                                                                                                                                                                                                                                                                                                                                                                                                                                                              | 90323   |
| 20 | retrospective.ab,hw,kw,ti.                                                                                                                                                                                                                                                                                                                                                                                                                                                                                                                                                                                                                                                                                                                                                                                                                                                                                                                                                                                                                                                                                                                                                                                                                   | 1280890 |
| 21 | (admission or hospitali?ation or discharge).ab,hw,kw,ti.                                                                                                                                                                                                                                                                                                                                                                                                                                                                                                                                                                                                                                                                                                                                                                                                                                                                                                                                                                                                                                                                                                                                                                                     | 1117031 |
| 22 | and/18-21                                                                                                                                                                                                                                                                                                                                                                                                                                                                                                                                                                                                                                                                                                                                                                                                                                                                                                                                                                                                                                                                                                                                                                                                                                    | 991     |
| 23 | and/9,14,18                                                                                                                                                                                                                                                                                                                                                                                                                                                                                                                                                                                                                                                                                                                                                                                                                                                                                                                                                                                                                                                                                                                                                                                                                                  | 6851    |
| 24 | (ISRCTN96643197 or ChiCTR1900026250 or NCT04008914 or NCT03791541 or NCT03300791 or "CTRI/2016/10/007411" or "CTRI/2014/06/004690" or NCT03949439 or NCT03905226 or NCT00344513 or NCT01755052 or NCT02041585).ab,cn,kw,ti.                                                                                                                                                                                                                                                                                                                                                                                                                                                                                                                                                                                                                                                                                                                                                                                                                                                                                                                                                                                                                  | 31      |
| 25 | ((OPERA or REIC or FigARO or PREDIC or optimize-hf or ten-hms or tele-hf or readmits or silver-ami or dc promis or KorAHF) adj3 (trial or study)).ab,kw,ti.                                                                                                                                                                                                                                                                                                                                                                                                                                                                                                                                                                                                                                                                                                                                                                                                                                                                                                                                                                                                                                                                                  | 285     |
| 26 | or/22-25                                                                                                                                                                                                                                                                                                                                                                                                                                                                                                                                                                                                                                                                                                                                                                                                                                                                                                                                                                                                                                                                                                                                                                                                                                     | 8017    |

### Supplemental Text 2. Data items

The following data was collected in accordance with the CHARMS checklist (Critical Appraisal and Data Extraction for Systematic Reviews): citation, source of data, country, study design, setting, participant description, sample characteristics, study dates, outcome definition, follow-up, number and type of predictors, definition and method for measurement of predictors, timing of predictor measurement, handling of predictors in the modelling, number of participants and number of outcomes/events, calibration, discrimination, classification, methods used for testing model performance, final multivariable model results (regression coefficients, intercept, baseline survival, model performance), and model presentation.

For peer review only

1  
2  
3  
4  
5  
6  
7  
8  
9  
10  
11  
12  
13  
14  
15  
16  
17  
18  
19  
20  
21  
22  
23  
24  
25  
26  
27  
28  
29  
30  
31  
32  
33  
34  
35  
36  
37  
38  
39  
40  
41  
42  
43  
44  
45  
46

**Supplemental Table 1A. Risk of Bias**

| Study            | Model                                    | Risk of bias |            |         |          | Overall Risk of bias | Applicability |            |         | Overall applicability |
|------------------|------------------------------------------|--------------|------------|---------|----------|----------------------|---------------|------------|---------|-----------------------|
|                  |                                          | Participants | Predictors | Outcome | Analysis |                      | Participants  | Predictors | Outcome |                       |
| Barnett et al.   | Model validation                         | -            | ?          | +       | -        | -                    | +             | +          | +       | +                     |
|                  | Model update                             | -            | ?          | +       | -        | -                    | +             | +          | +       | +                     |
| Sanchez et al.   | NR                                       | -            | ?          | ?       | -        | -                    | +             | +          | +       | +                     |
| Deo et al.       | 30-days CABG Readmission Calculator      | -            | -          | -       | -        | -                    | +             | +          | ?       | ?                     |
| Tan et al.       | NR                                       | -            | -          | -       | -        | -                    | +             | +          | -       | -                     |
| Wang et al.      | NR                                       | -            | ?          | ?       | -        | -                    | +             | +          | +       | +                     |
| Rosenblum et al. | The STS PROM score                       | -            | ?          | -       | -        | -                    | +             | +          | +       | +                     |
| Dodson et al.    | SILVER-AMI 30-day readmission calculator | +            | +          | +       | +        | +                    | +             | +          | +       | +                     |
| Lim et al.       | NR                                       | +            | ?          | -       | -        | -                    | +             | +          | -       | -                     |
| Kini et al.      | NR                                       | -            | -          | -       | ?        | -                    | +             | +          | +       | +                     |
| Nguyen et al.    | AMI READMITS score                       | -            | -          | +       | -        | -                    | +             | +          | +       | +                     |
|                  | Full-stay AMI model                      | -            | -          | +       | -        | -                    | +             | +          | +       | +                     |
|                  | CMS AMI administrative model             | -            | ?          | +       | -        | -                    | +             | +          | +       | +                     |
| Cediel et al.    | TARRACO Risk Score                       | -            | -          | -       | -        | -                    | +             | +          | -       | -                     |
| Brown et al.     | STS 30-day Readmission Model             | +            | ?          | ?       | -        | -                    | +             | +          | ?       | ?                     |
|                  | STS Augmented Clinical Model             | -            | ?          | +       | -        | -                    | +             | +          | ?       | ?                     |
| Khera et al.     | TAVR 30-Day Readmission Risk Model       | -            | -          | ?       | -        | -                    | +             | +          | ?       | ?                     |
| Tam et al.       | NR                                       | -            | -          | ?       | -        | -                    | +             | +          | ?       | ?                     |
| Atzema et al.    | AFTER Part 2 scoring system              | -            | -          | -       | -        | -                    | +             | +          | -       | -                     |
| Stuebe et al.    | NR                                       | -            | +          | -       | -        | -                    | +             | +          | +       | +                     |
| Huynh et al.     | NR                                       | -            | -          | ?       | -        | -                    | +             | +          | +       | +                     |
| Zywot et al.     | CABG Risk Scale                          | -            | ?          | ?       | -        | -                    | +             | +          | +       | +                     |

Supplemental Table 1. Risk of bias (continued)

| Study                    | Model                            | Risk of bias |            |         |          | Overall Risk of bias | Applicability |            |         | Overall applicability |
|--------------------------|----------------------------------|--------------|------------|---------|----------|----------------------|---------------|------------|---------|-----------------------|
|                          |                                  | Participants | Predictors | Outcome | Analysis |                      | Participants  | Predictors | Outcome |                       |
| Cox et al.               | CMS HF medical model             | -            | +          | +       | -        | -                    | +             | +          | +       | +                     |
|                          | CMS HF administrative model      | -            | ?          | +       | -        | -                    | +             | +          | +       | +                     |
| Zitser-Gurevich et al.   | NR                               | ?            | +          | +       | -        | -                    | +             | +          | +       | +                     |
| Ahmad et al.             | CMS HF administrative model      | -            | +          | +       | -        | -                    | +             | +          | +       | +                     |
| Minges et al.            | NR                               | -            | +          | +       | -        | -                    | +             | +          | +       | +                     |
| Pack et al.              | NR                               | -            | -          | -       | -        | -                    | +             | +          | +       | +                     |
| Benuzillo et al.         | CRSS                             | -            | -          | +       | -        | -                    | +             | +          | +       | +                     |
| Kitamura et al.          | FIM                              | -            | ?          | -       | -        | -                    | +             | +          | +       | +                     |
| Lahewala et al.          | CHADS2                           | -            | ?          | +       | -        | -                    | +             | +          | +       | +                     |
|                          | CHA2DS-VASc                      | -            | ?          | +       | -        | -                    | +             | +          | +       | +                     |
| Formiga et al.           | CMS HF medical model             | -            | ?          | -       | -        | -                    | +             | +          | +       | +                     |
| Leong et al.             | 30-day HF readmission risk score | -            | +          | -       | -        | -                    | +             | +          | -       | -                     |
| Burke et al.             | HOSPITAL score                   | -            | -          | -       | -        | -                    | +             | +          | +       | +                     |
| Kilic et al.             | NR                               | -            | ?          | -       | -        | -                    | +             | +          | +       | +                     |
| Moulder et al.           | NR                               | +            | +          | -       | -        | -                    | +             | +          | +       | +                     |
| Chotechuang et al.       | GRACE                            | -            | -          | -       | -        | -                    | +             | +          | -       | -                     |
| Yazdan-Ashoori et al.    | LACE                             | ?            | ?          | +       | -        | -                    | +             | +          | +       | +                     |
|                          | CMS HF administrative model      | ?            | ?          | +       | -        | -                    | +             | +          | +       | +                     |
| Oliver-McNeil et al.     | ICD Readmission-Risk Score       | -            | ?          | -       | -        | -                    | +             | +          | +       | +                     |
| Sudhakar et al.          | CMS HF medical model             | -            | +          | -       | -        | -                    | +             | +          | +       | +                     |
| Raposeiras-Roubín et al. | GRACE                            | -            | -          | -       | -        | -                    | +             | +          | -       | -                     |
| Betihavas et al.         | NR                               | -            | ?          | -       | -        | -                    | +             | +          | -       | -                     |
| Lancey et al.            | NR                               | -            | ?          | -       | -        | -                    | +             | +          | +       | +                     |
| Moretti et al.           | EuroHeart PCI score              | -            | +          | -       | -        | -                    | +             | +          | -       | -                     |
| Hilbert et al.           | HF decision tree                 | -            | +          | +       | -        | -                    | +             | +          | +       | +                     |
|                          | AMI decision tree                | -            | +          | +       | -        | -                    | +             | +          | +       | +                     |

1  
2  
3  
4  
5  
6  
7  
8  
9  
10  
11  
12  
13  
14  
15  
16  
17  
18  
19  
20  
21  
22  
23  
24  
25  
26  
27  
28  
29  
30  
31  
32  
33  
34  
35  
36  
37  
38  
39  
40  
41  
42  
43  
44  
45  
46

**Supplemental Table 1. Risk of bias (continued)**

| Study               | Model                                            | Risk of bias |            |         |          | Overall Risk of bias | Applicability |            |         | Overall applicability |
|---------------------|--------------------------------------------------|--------------|------------|---------|----------|----------------------|---------------|------------|---------|-----------------------|
|                     |                                                  | Participants | Predictors | Outcome | Analysis |                      | Participants  | Predictors | Outcome |                       |
| Wang et al.         | LACE                                             | -            | ?          | -       | -        | -                    | +             | +          | +       | +                     |
| Rana et al.         | HOSPITAL score                                   | -            | ?          | -       | -        | -                    | +             | +          | -       | -                     |
|                     | Elixhauser index                                 | -            | ?          | -       | -        | -                    | +             | +          | -       | -                     |
| Hummel et al.       | CMS HF medical model                             | ?            | +          | +       | -        | -                    | +             | +          | +       | +                     |
| Salah et al.        | ELAN-HF score                                    | -            | ?          | -       | -        | -                    | +             | +          | -       | -                     |
| Wasfy et al.        | Pre-PCI model                                    | -            | +          | ?       | -        | -                    | +             | +          | +       | +                     |
| Engoren et al.      | NR                                               | -            | ?          | +       | -        | -                    | +             | +          | +       | +                     |
| Au et al.           | Administrative Claims Model: HF 30-day mortality | -            | ?          | ?       | -        | -                    | +             | +          | ?       | ?                     |
|                     | Charlson Comorbidity Score                       | -            | ?          | ?       | -        | -                    | +             | +          | ?       | ?                     |
|                     | CMS HF administrative model                      | -            | ?          | ?       | -        | -                    | +             | +          | ?       | ?                     |
|                     | LACE                                             | -            | ?          | ?       | -        | -                    | +             | +          | ?       | ?                     |
| Krumholz et al.     | CMS AMI medical model                            | +            | -          | +       | -        | -                    | +             | +          | +       | +                     |
|                     | CMS AMI administrative model                     | -            | -          | +       | -        | -                    | +             | +          | +       | +                     |
| Amarasingham et al. | Tabak mortality score                            | -            | ?          | ?       | -        | -                    | +             | +          | +       | +                     |
|                     | CMS HF administrative model                      | -            | ?          | ?       | -        | -                    | +             | +          | +       | +                     |
|                     | ADHERE                                           | -            | ?          | ?       | -        | -                    | +             | +          | +       | +                     |
| Keenan et al.       | CMS HF administrative model                      | -            | -          | +       | -        | -                    | +             | +          | +       | +                     |
|                     | CMS HF medical model                             | +            | -          | -       | -        | -                    | +             | +          | +       | +                     |
| Ferraris et al.     | READMIT                                          | ?            | +          | +       | -        | -                    | +             | +          | +       | +                     |
| Delgado et al.      | 15-day CV readmission risk score                 | ?            | +          | -       | -        | -                    | +             | +          | -       | -                     |
|                     | 30-day CV readmission risk score                 | ?            | +          | -       | -        | -                    | +             | +          | -       | -                     |
| Espinoza et al.     | 30-day readmission score after cardiac surgery   | +            | ?          | ?       | -        | -                    | +             | +          | +       | +                     |

**Supplemental Table 1. Risk of bias (continued)**

| Study           | Model                       | Risk of bias |            |         |          | Overall Risk of bias | Applicability |            |         | Overall applicability |
|-----------------|-----------------------------|--------------|------------|---------|----------|----------------------|---------------|------------|---------|-----------------------|
|                 |                             | Participants | Predictors | Outcome | Analysis |                      | Participants  | Predictors | Outcome |                       |
| Reed et al.     | CMS HF administrative model | -            | ?          | ?       | -        | -                    | +             | +          | +       | +                     |
|                 | PARR-30                     | -            | ?          | ?       | -        | -                    | +             | +          | +       | +                     |
|                 | LACE                        | -            | ?          | ?       | -        | -                    | +             | +          | +       | +                     |
|                 | Hasan                       | -            | ?          | ?       | -        | -                    | +             | +          | +       | +                     |
|                 | AH model                    | -            | ?          | ?       | -        | -                    | +             | +          | +       | +                     |
| Ibrahim et al.  | HOSPITAL score              | -            | +          | -       | -        | -                    | +             | +          | +       | +                     |
|                 | LACE                        | -            | +          | -       | -        | -                    | +             | +          | +       | +                     |
|                 | LACE+ index                 | -            | +          | -       | -        | -                    | +             | +          | +       | +                     |
| Bardhan et al.  | NR                          | -            | -          | -       | -        | -                    | +             | +          | -       | -                     |
| Asche et al.    | NR                          | -            | ?          | -       | -        | -                    | +             | +          | ?       | ?                     |
| Li et al.       | NR                          | -            | ?          | +       | -        | -                    | +             | +          | +       | +                     |
| Hamill et al.   | CMS HF administrative model | -            | -          | +       | ?        | -                    | +             | +          | +       | +                     |
| Frizzell et al. | CMS HF administrative model | -            | -          | +       | -        | -                    | +             | +          | +       | +                     |

Legend: the overall risk of bias assessment is located in the main paper.

Abbreviations: AH: Adventist hospitals, CABG: coronary artery bypass grafting, CMS=centers for Medicare and Medicaid services, CRSS: CABG Readmission Risk Score, Fim: motor and cognitive Functional Independence Measure, HF: heart failure, ICD: implantable cardioverter defibrillator, NR: not reported, PARR-30: Patients at Risk of Re-admission within 30-days, PCI: percutaneous coronary intervention, TAVR: transcatheter aortic valve replacement

### Supplemental Figure 1. Meta-analysis of CMS AMI administrative model

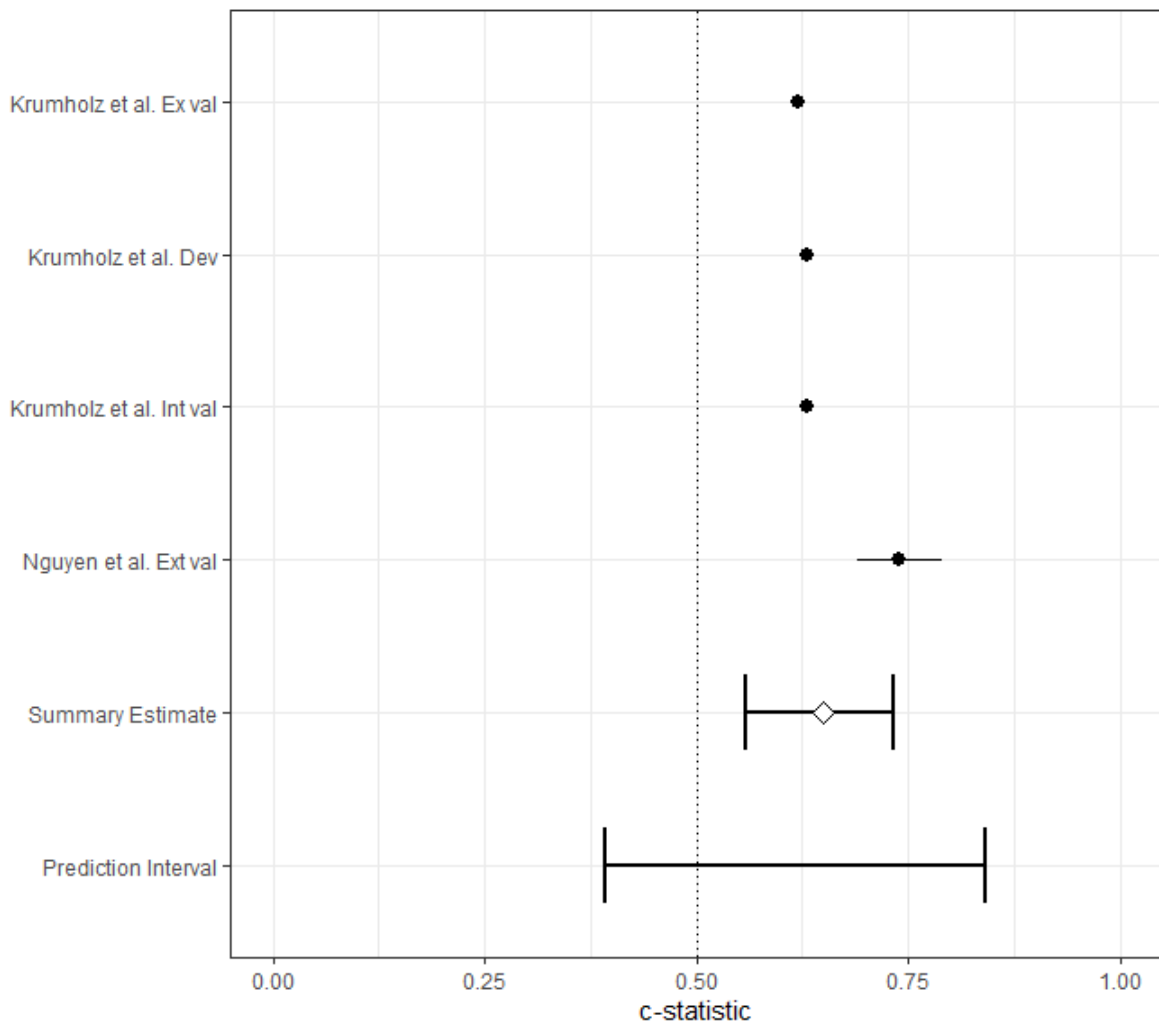

Legend: The CMS acute myocardial infarction (AMI) administrative model was evaluated in four independent cohorts in two studies: 0.65, 95% CI 0.56 to 0.73, 95% prediction interval 0.39 to 0.84. Standard errors were derived from the reported c-statistics, sample size and observed events. The readmission rate was missing for the internal validation cohort in the Krumholz et al. study, and this data was needed to derive the observed events. The development and validation cohort in the Krumholz et al. study were similar samples and we used the average readmission rate from these two cohorts to impute the missing readmission rate for the internal validation.

Abbreviations: Ext val: external validation, Int val: internal validation, Dev: Development



**Supplemental Figure 2. Meta-analysis of CMS HF administrative model**

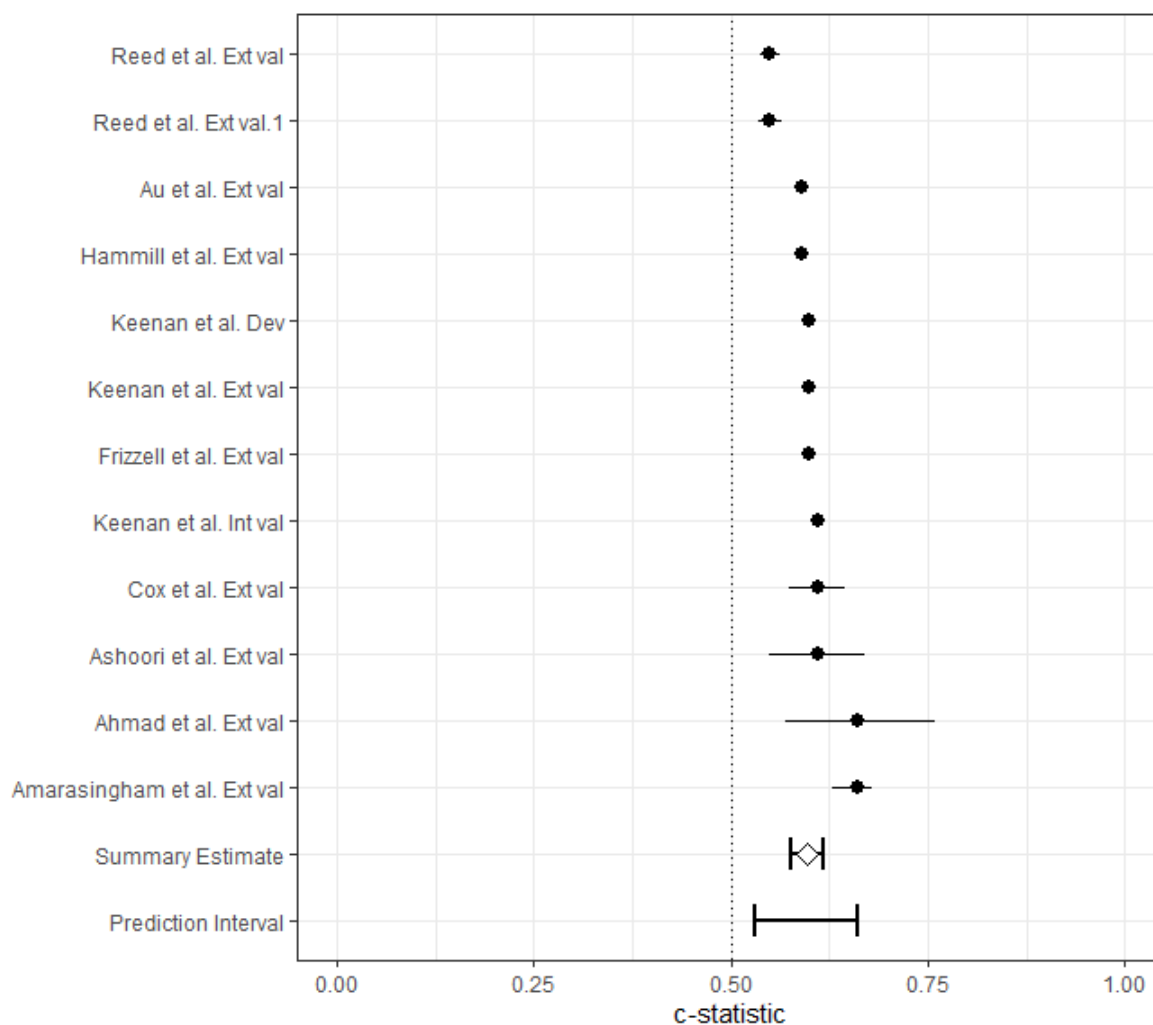

Legend: The CMS heart failure (HF) administrative model was evaluated in twelve independent cohorts in nine studies: 0.60, 95% CI 0.58 to 0.62, 95% prediction interval 0.53 to 0.66. Standard errors were derived from the reported c-statistics, sample size and observed events. The readmission rate was missing for the internal validation cohort in the Keenan et al. study, and this data was needed to derive the observed events. The development and validation cohort in the Keenan et al. study were similar samples and we used the average readmission rate from these two cohorts to impute the missing readmission rate for the internal validation.

Abbreviations: Ext val: external validation, Int val: internal validation, Dev: Development

### Supplemental Figure 3. Meta-analysis of CMS medical model

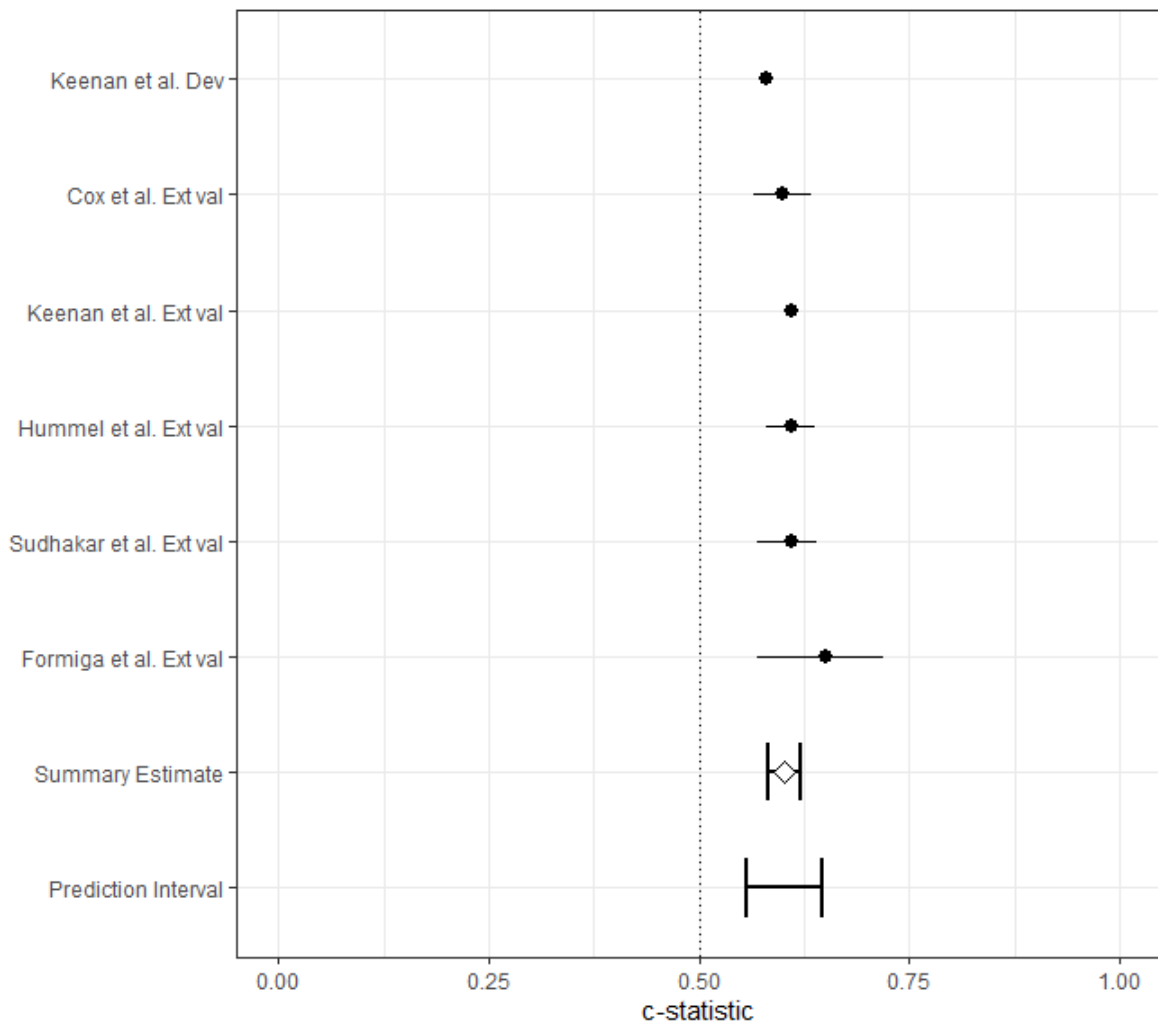

Legend: The CMS medical model was evaluated in six independent cohorts in five studies: 0.60, 95% CI 0.58 to 0.62, 95% prediction interval 0.56 to 0.65. Standard errors were derived from the reported c-statistics, sample size and observed events.

Abbreviations: Ext val: external validation, Int val: internal validation, Dev: Development

Supplemental Figure 4. Meta-analysis of HOSPITAL score

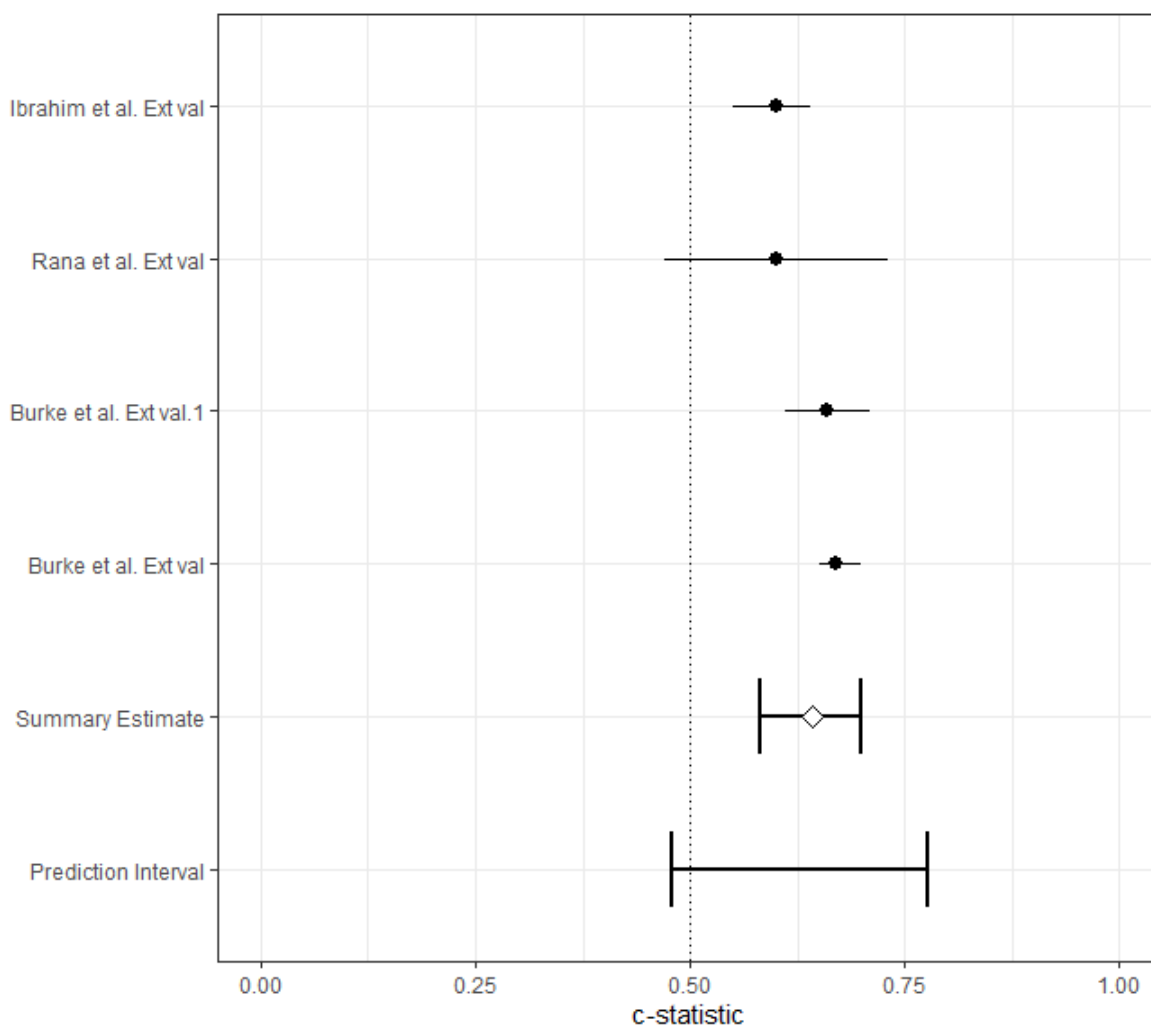

Legend: The HOSPITAL score was evaluated in four independent cohorts in three studies: 0.64, 95% CI 0.58 to 0.70, 95% prediction interval 0.48 to 0.78. Standard errors were derived from the reported c-statistics, sample size and observed events.

Abbreviations: Ext val: external validation, Int val: internal validation, Dev: Development

### Supplemental Figure 5. Meta-analysis of GRACE

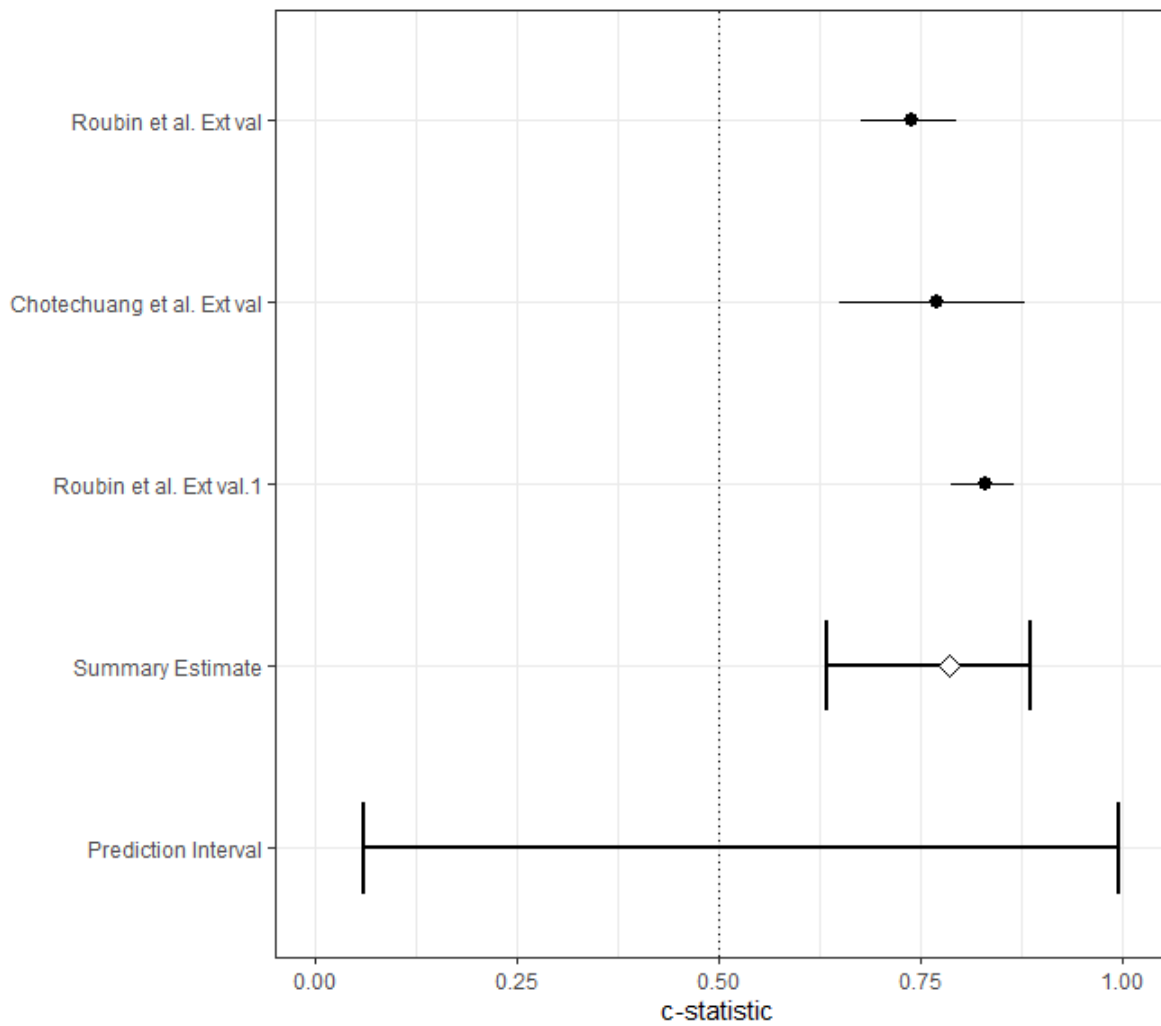

Legend: GRACE was evaluated in four independent cohorts in three studies: 0.79, 95% CI 0.63 to 0.86, 95% prediction interval 0.06 to 1.00. Standard errors were derived from the reported c-statistics, sample size and observed events.

Abbreviations: Ext val: external validation, Int val: internal validation, Dev: Development

Supplemental Figure 6. Meta-analysis of LACE

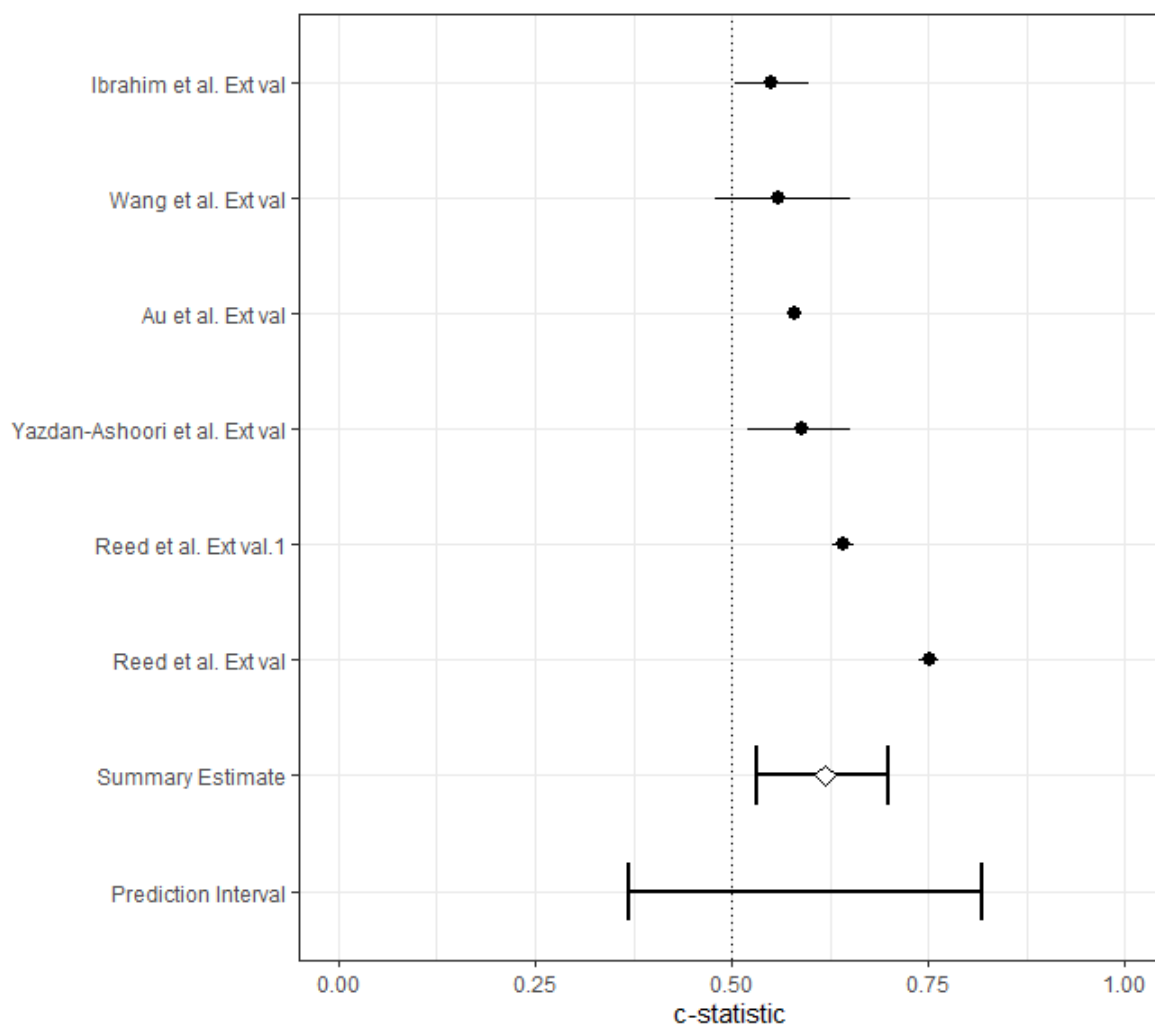

Legend: LACE was evaluated in six independent cohorts in five studies: 0.62, 95% CI 0.53 to 0.70, 95% prediction interval 0.37 to 0.82. Standard errors were derived from the reported c-statistics, sample size and observed events.

Abbreviations: Ext val: external validation, Int val: internal validation, Dev: Development

**Supplemental Figure 7. Age as moderator**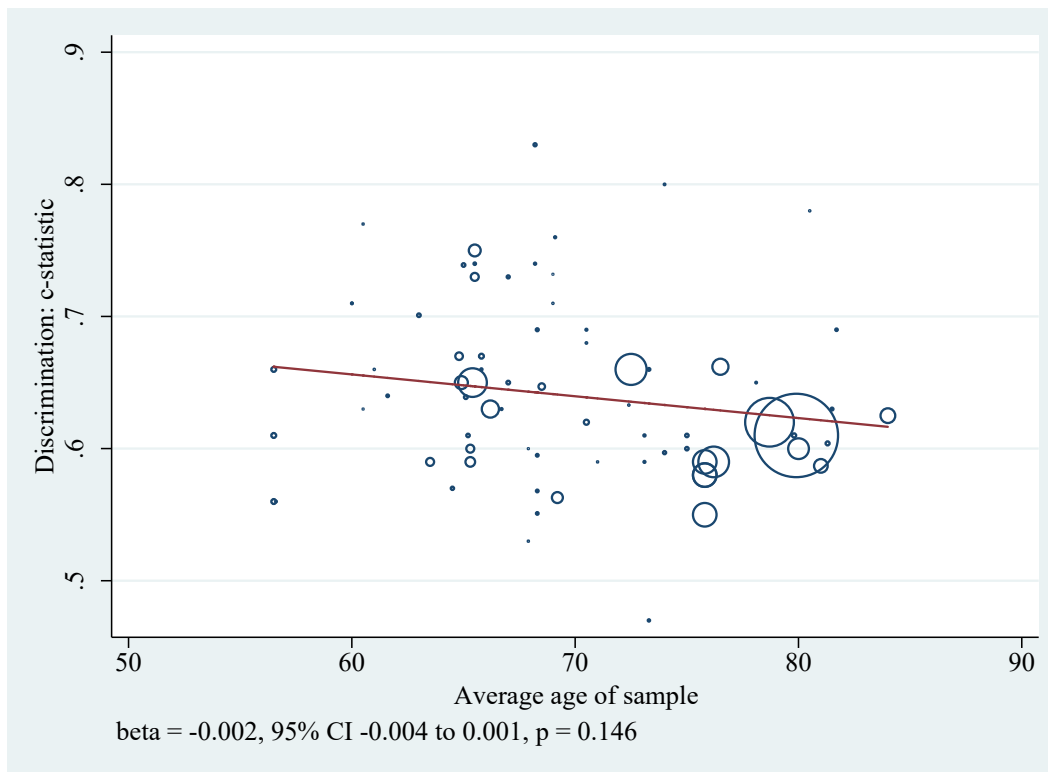

Legend: A meta-regression with average sample age as covariate was performed. The outcome was the discrimination (c-statistic). There is no association between the sample age and the discrimination.

**Supplemental Figure 8. Number of predictors as moderator**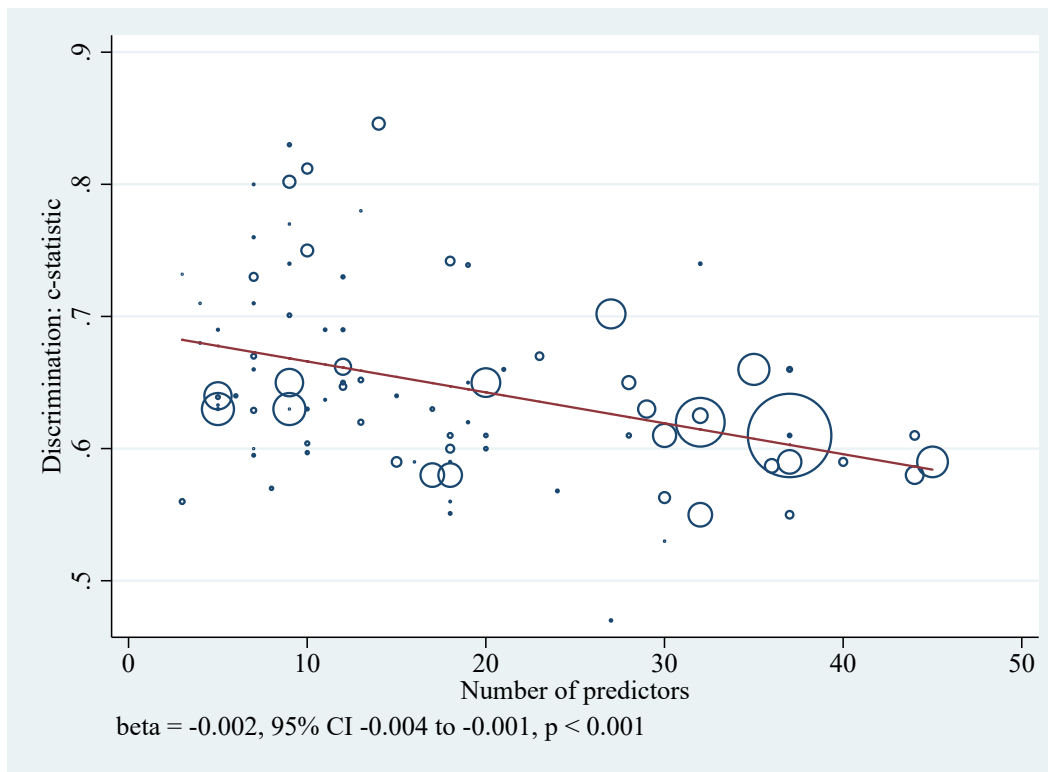

Legend: A meta-regression with the number of predictors as covariate was performed. The outcome was the discrimination (c-statistic). The discrimination increases with the number of predictors decreases. This association is significant.

## Supplemental Table 1B. Subgroup analyses

| Moderators                    | N  | C-statistic | 95% CI        | Test for subgroup difference |
|-------------------------------|----|-------------|---------------|------------------------------|
| <b>Population</b>             |    |             |               | p = 0.835                    |
| - Surgical                    | 17 | 0.627       | 0.605 – 0.649 |                              |
| - TAVR                        | 2  | 0.645       | 0.560 – 0.729 |                              |
| - Heart failure               | 45 | 0.641       | 0.623 – 0.658 |                              |
| - Acute myocardial infarction | 16 | 0.671       | 0.644 – 0.697 |                              |
| - Arrhythmias                 | 5  | 0.640       | 0.630 – 0.649 |                              |
| - Valve disease               | 1  | 0.650       | 0.641 – 0.659 |                              |
| - ICD implantation            | 1  | 0.710       | 0.605 – 0.815 |                              |
| - Reinfarction                | 1  | 0.740       | 0.681 – 0.799 |                              |
| - Acute coronary syndrome     | 1  | 0.590       | 0.475 – 0.705 |                              |
| - Mixed                       | 3  | 0.660       | 0.656 – 0.664 |                              |
| <b>Data source</b>            |    |             |               | p = 0.014                    |
| - Registry                    | 17 | 0.613       | 0.602 – 0.624 |                              |
| - Administrative database     | 17 | 0.664       | 0.635 – 0.693 |                              |
| - Hospital database           | 18 | 0.612       | 0.593 – 0.632 |                              |
| - Prospective cohort          | 16 | 0.640       | 0.613 – 0.667 |                              |
| - Retrospective cohort        | 23 | 0.682       | 0.653 – 0.710 |                              |
| - Secondary analysis          | 2  | 0.695       | 0.497 – 0.894 |                              |
| <b>Endpoint</b>               |    |             |               | p = 0.589                    |
| - 15 days                     | 1  | 0.633       | 0.539 – 0.727 |                              |
| - 28 days                     | 1  | 0.800       | 0.720 – 0.880 |                              |
| - 30 days                     | 78 | 0.642       | 0.631 – 0.654 |                              |
| - 90 days                     | 8  | 0.645       | 0.632 – 0.657 |                              |
| - 100 days                    | 1  | 0.652       | 0.626 – 0.678 |                              |
| - 180 days                    | 4  | 0.656       | 0.591 – 0.721 |                              |
| <b>Outcome definition</b>     |    |             |               | p = 0.144                    |
| - All cause                   | 65 | 0.644       | 0.633 – 0.656 |                              |
| - Cardiac related             | 18 | 0.676       | 0.628 – 0.723 |                              |

Legend: Subgroup analyses were performed. The outcome was the discrimination (c-statistic). The discrimination is moderator by the data source that was used in the study, but not by the population, outcome definition and endpoint.



**Supplemental Table 2A. Summary of meta-analyses predictors**

| Predictor                                | Coefficient, 95% CI | Prediction interval |
|------------------------------------------|---------------------|---------------------|
| Age (years)                              | 0.01, 0.00 - 0.01   | -0.01 - 0.03        |
| Female                                   | 0.10, 0.03 - 0.17   | -0.17 - 0.38        |
| Arrhythmias                              | 0.20, 0.12 - 0.28   | -0.04 - 0.43        |
| Chronic lung disease                     | 0.23, 0.05 - 0.40   | -0.35 - 0.80        |
| Chronic obstructive pulmonary disease    | 0.18, 0.15 - 0.22   | 0.08 - 0.29         |
| Artherosclerosis                         | 0.01, -0.13 - 0.15  | -0.38 - 0.41        |
| Diabetes mellitus                        | 0.16, 0.11 - 0.22   | -0.04 - 0.37        |
| Current heart failure                    | 0.27, 0.20 - 0.34   | 0.04 - 0.50         |
| Hypertension                             | 0.05, -0.02 - 0.12  | -0.16 - 0.25        |
| Valve disease                            | 0.10, 0.06 - 0.13   | 0.01 - 0.19         |
| Prior percutaneous coronary intervention | 0.01, -0.07 - 0.09  | -0.27 - 0.29        |
| History of heart failure                 | 0.38, 0.25 - 0.51   | 0.01 - 0.75         |
| Cerebrovascular disease                  | 0.08, 0.03 - 0.13   | -0.05 - 0.22        |
| Anemia                                   | 0.10, 0.06 - 0.14   | -0.01 - 0.22        |
| Stroke                                   | 0.07, 0.01 - 0.13   | -0.11 - 0.25        |
| Peripheral vascular disease              | 0.15, 0.09 - 0.21   | -0.03 - 0.34        |
| Dementia                                 | -0.04, -0.10 - 0.02 | -0.21 - 0.12        |
| Prior Coronary Artery Bypass Graft       | 0.04, -0.06 - 0.14  | -0.30 - 0.39        |

Legend: A meta-analyses was performed with the outcome 30 day unplanned hospital readmissions. The forest plots are detailed below. Please note that there are some small differences with the data reported in Figure 4 in the main manuscript. This is because of a difference in rounding the decimal points by the software.

## Supplemental Figure 9. Age as predictor

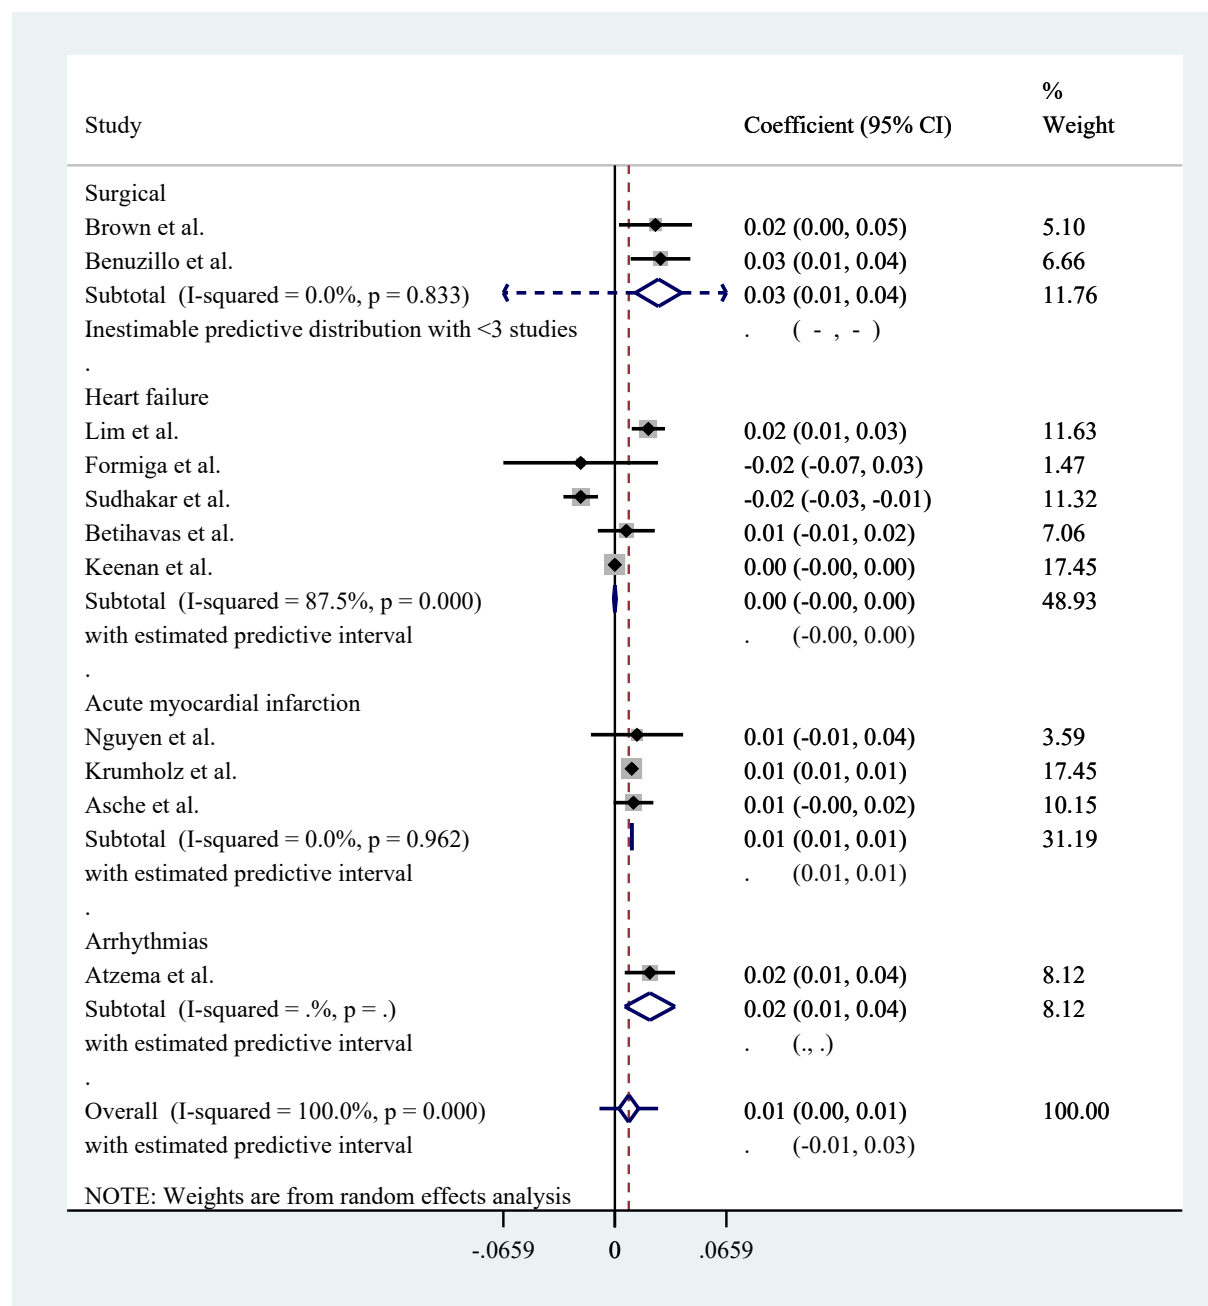

Legend: Two studies were not included in the analysis. One study had a missing standard error and one study reported transformed values. The values of their coefficients were: -0.001, and log(0,502).

Supplemental Figure 10. Female as predictor

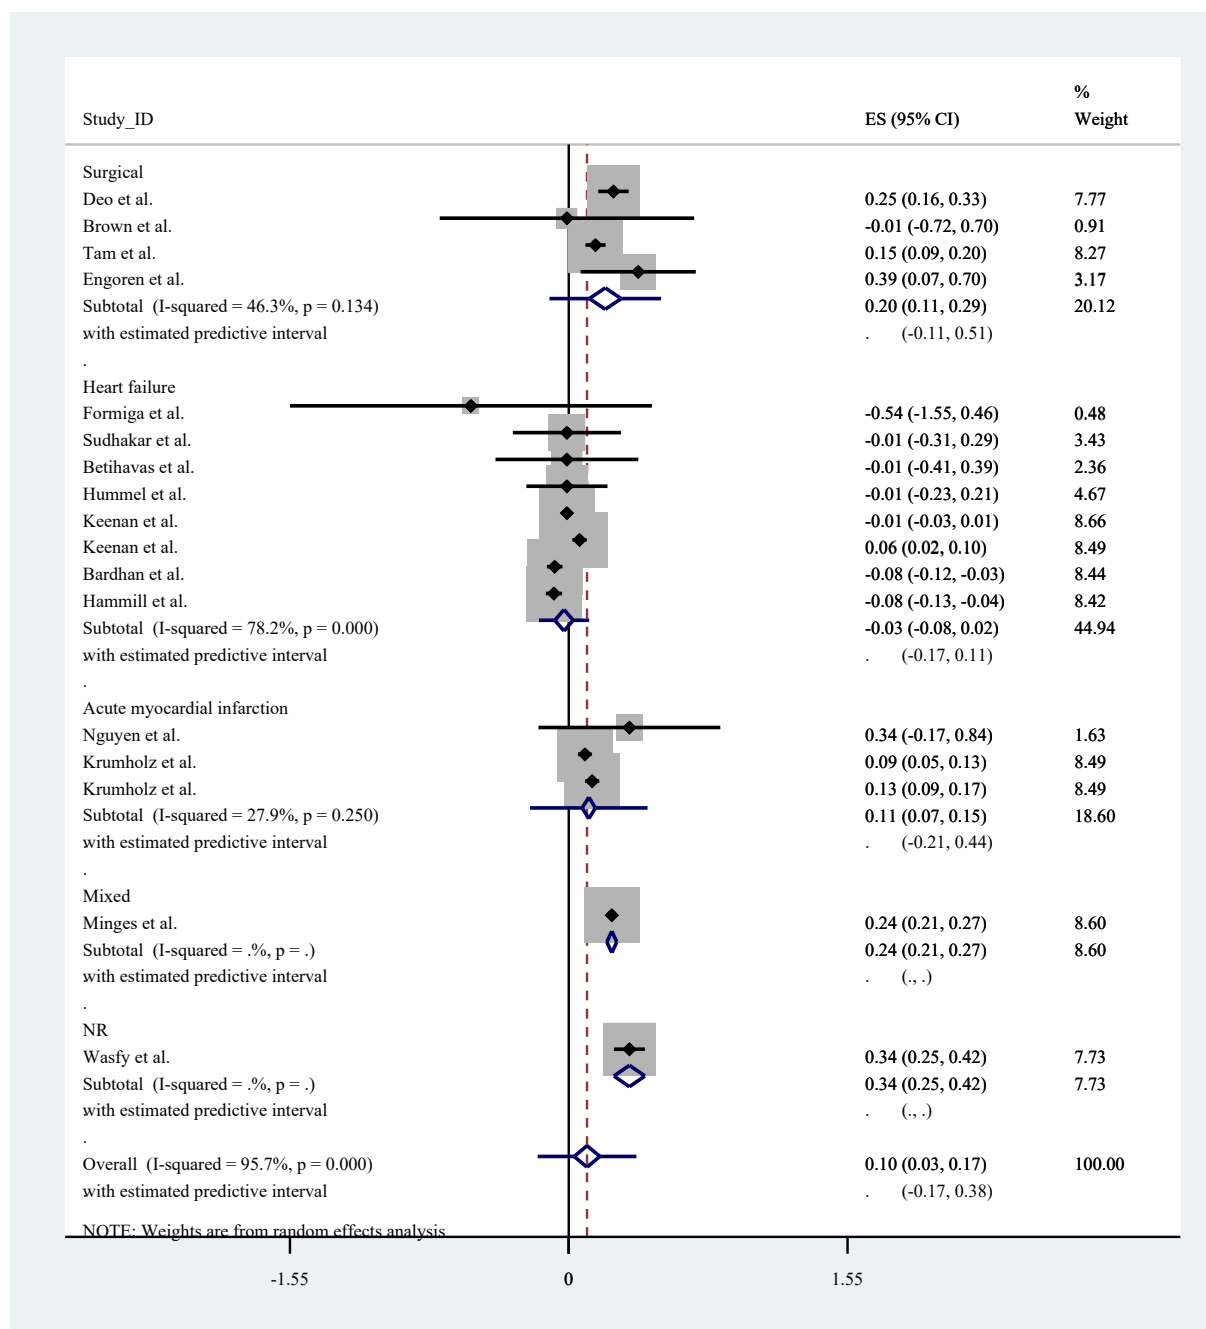

Legend: Two studies were not included in the analysis because the standard errors were missing. The values of their coefficients were: -0.28 and 0.206.

## Supplemental Figure 1. Arrhythmias as predictor

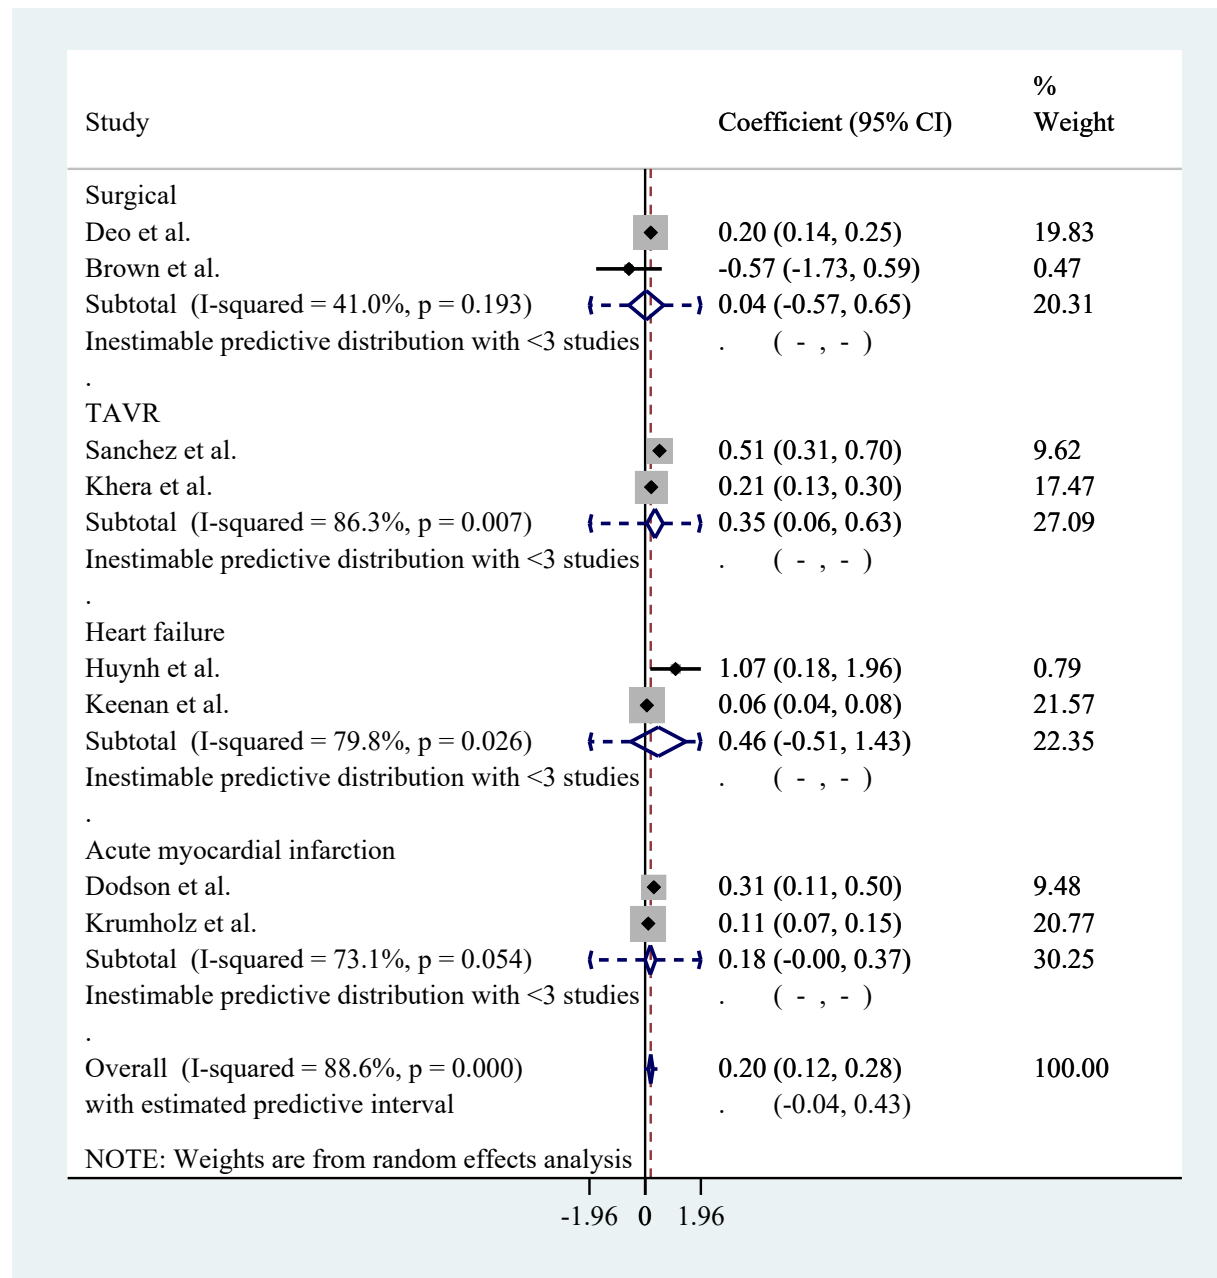

Legend: There was no missing data in the analysis.

Supplemental Figure 12. Chronic lung disease as predictor

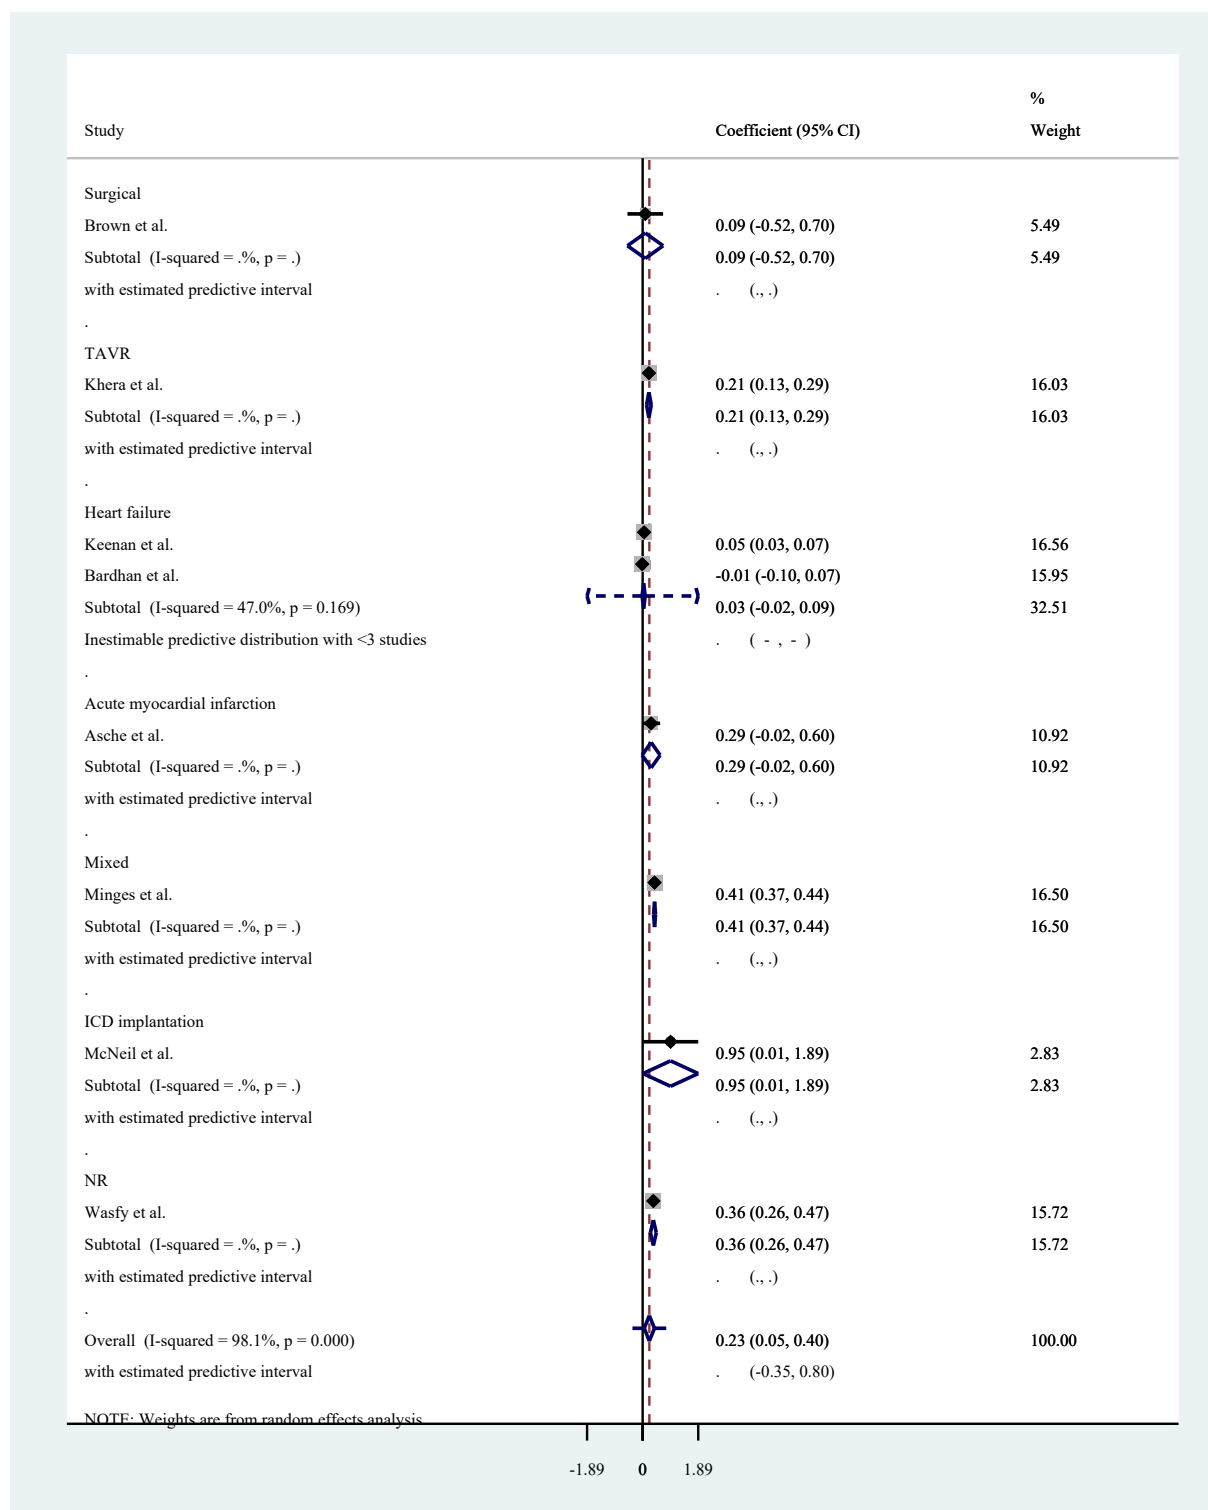

Legend: There was no missing data in the analysis.

## Supplemental Figure 13. Chronic Obstructive Pulmonary Disease as predictor

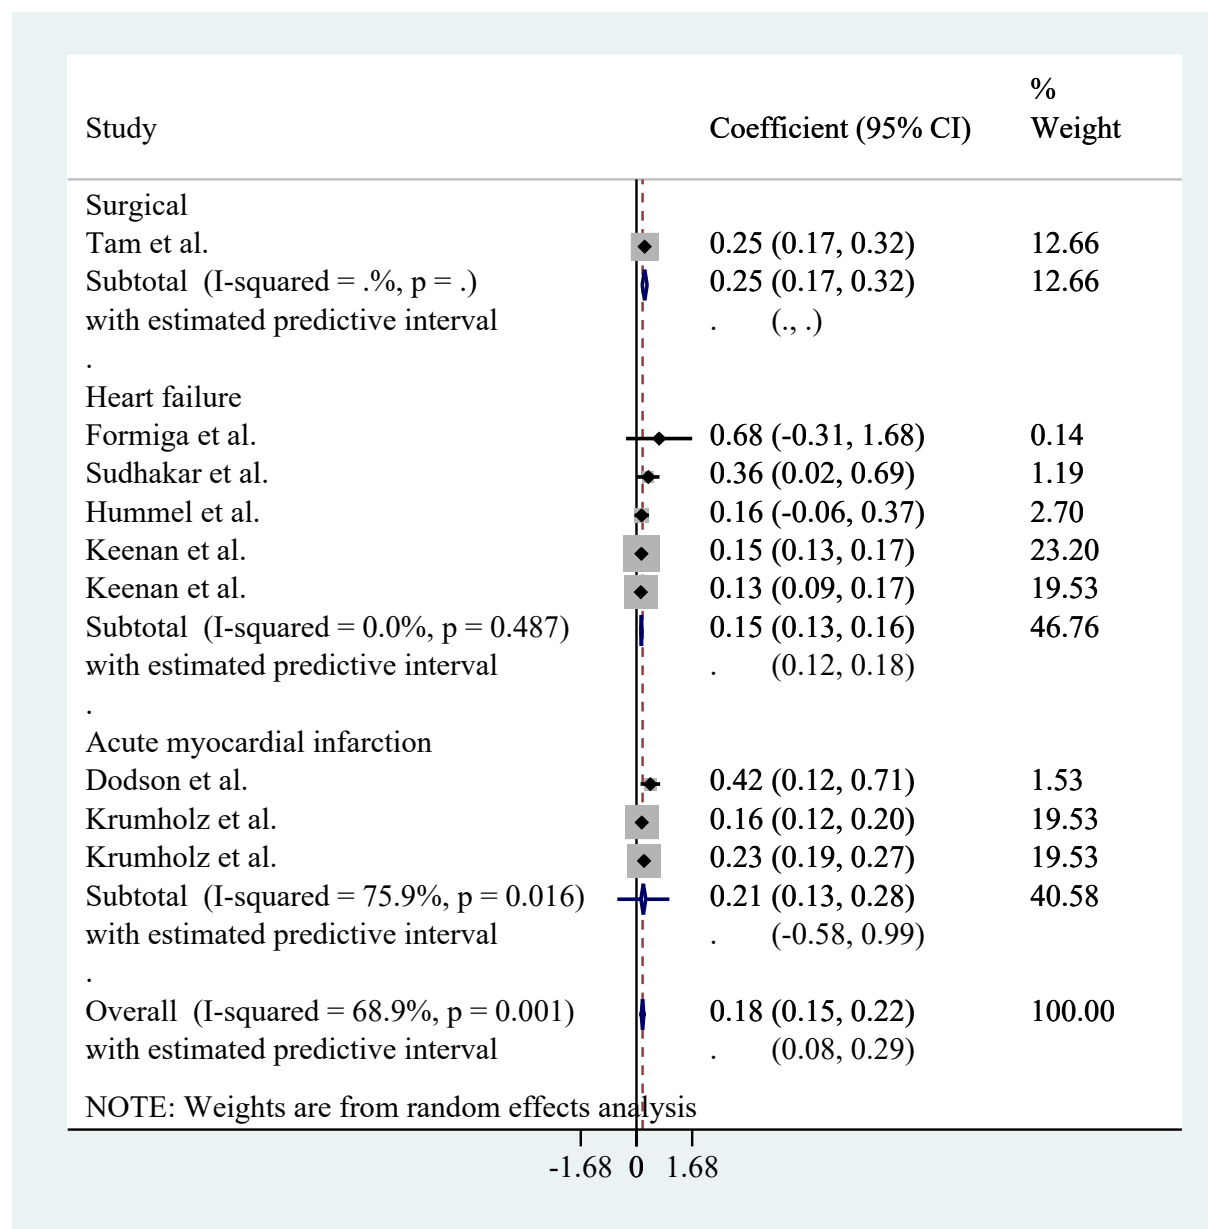

Legend: Two studies were not included in the analysis because the standard errors were missing. The values of their coefficients were: 0.053 and 0.677.

Supplemental Figure 14. Atherosclerosis as predictor

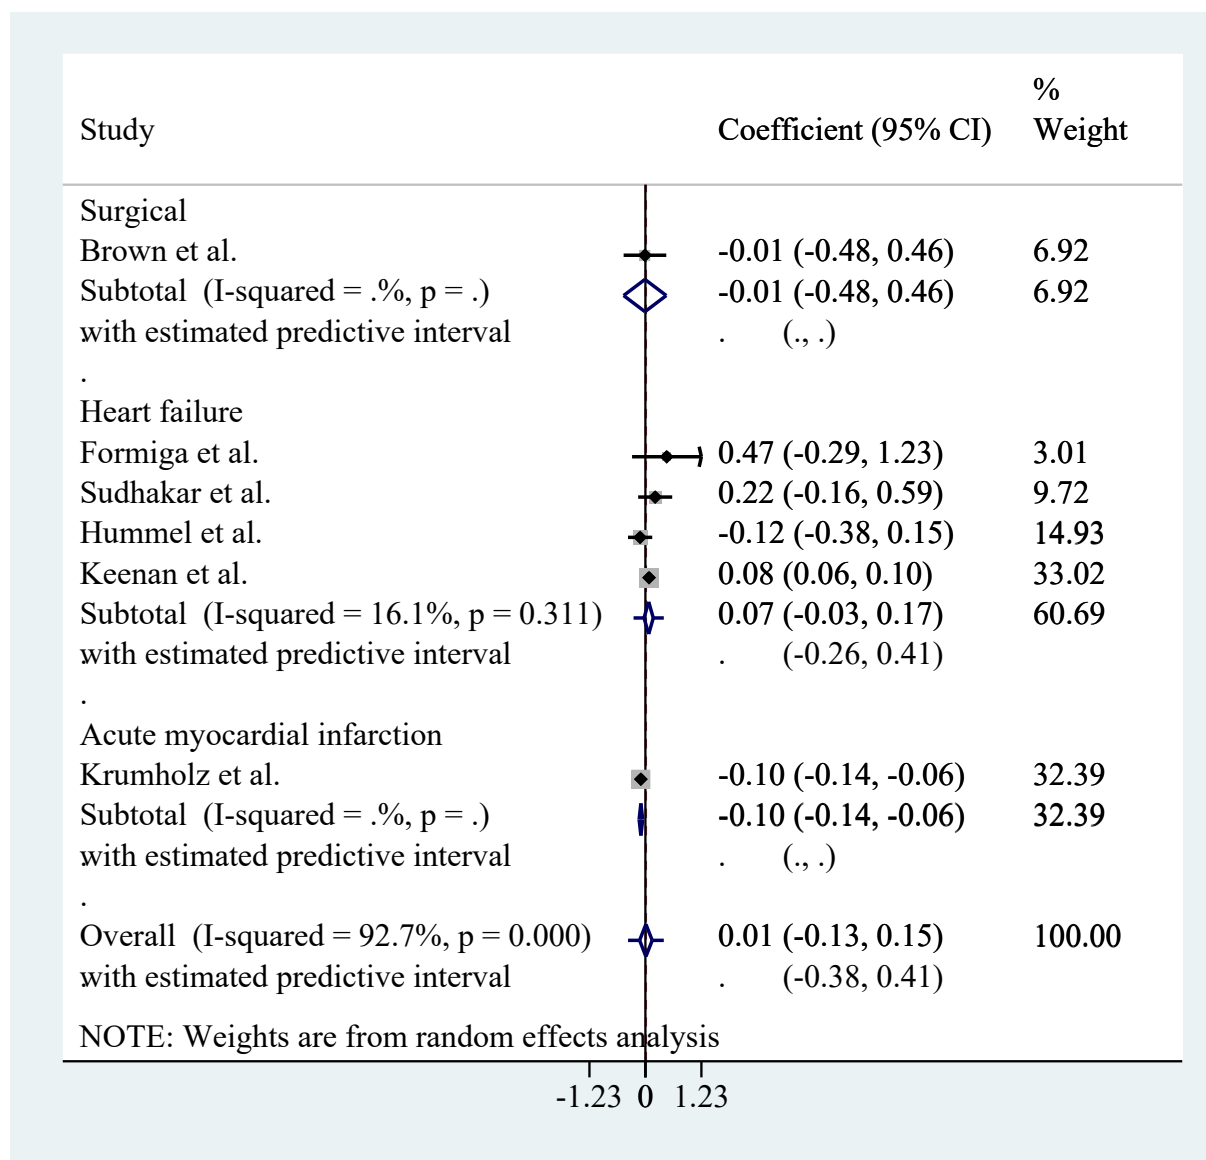

Legend: One study was not included in the analysis because the standard error were missing. The values of their coefficient was: 0.11.

Supplemental Figure 15. Diabetes Mellitus as predictor

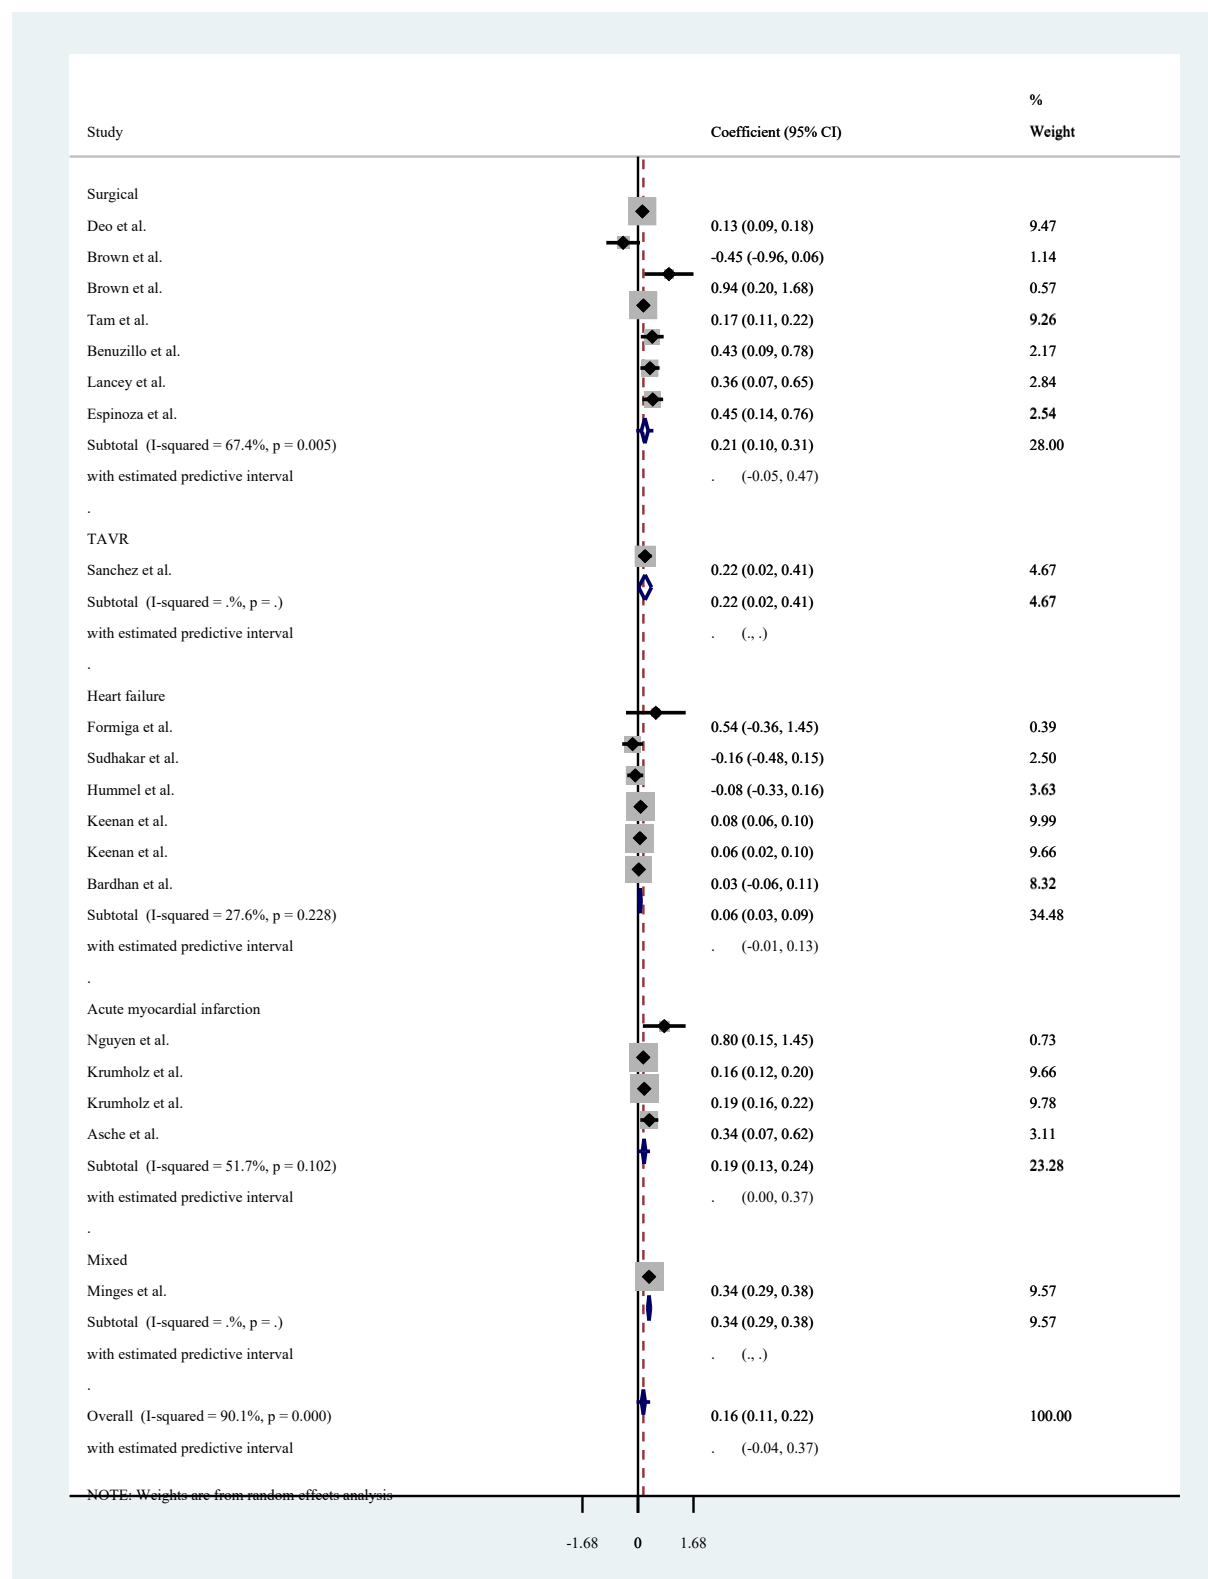

Legend: Two studies were not included in the analysis because the standard errors were missing. The values of their coefficients were: -0.068 and 0.639.



Supplemental Figure 16. Current heart failure as predictor

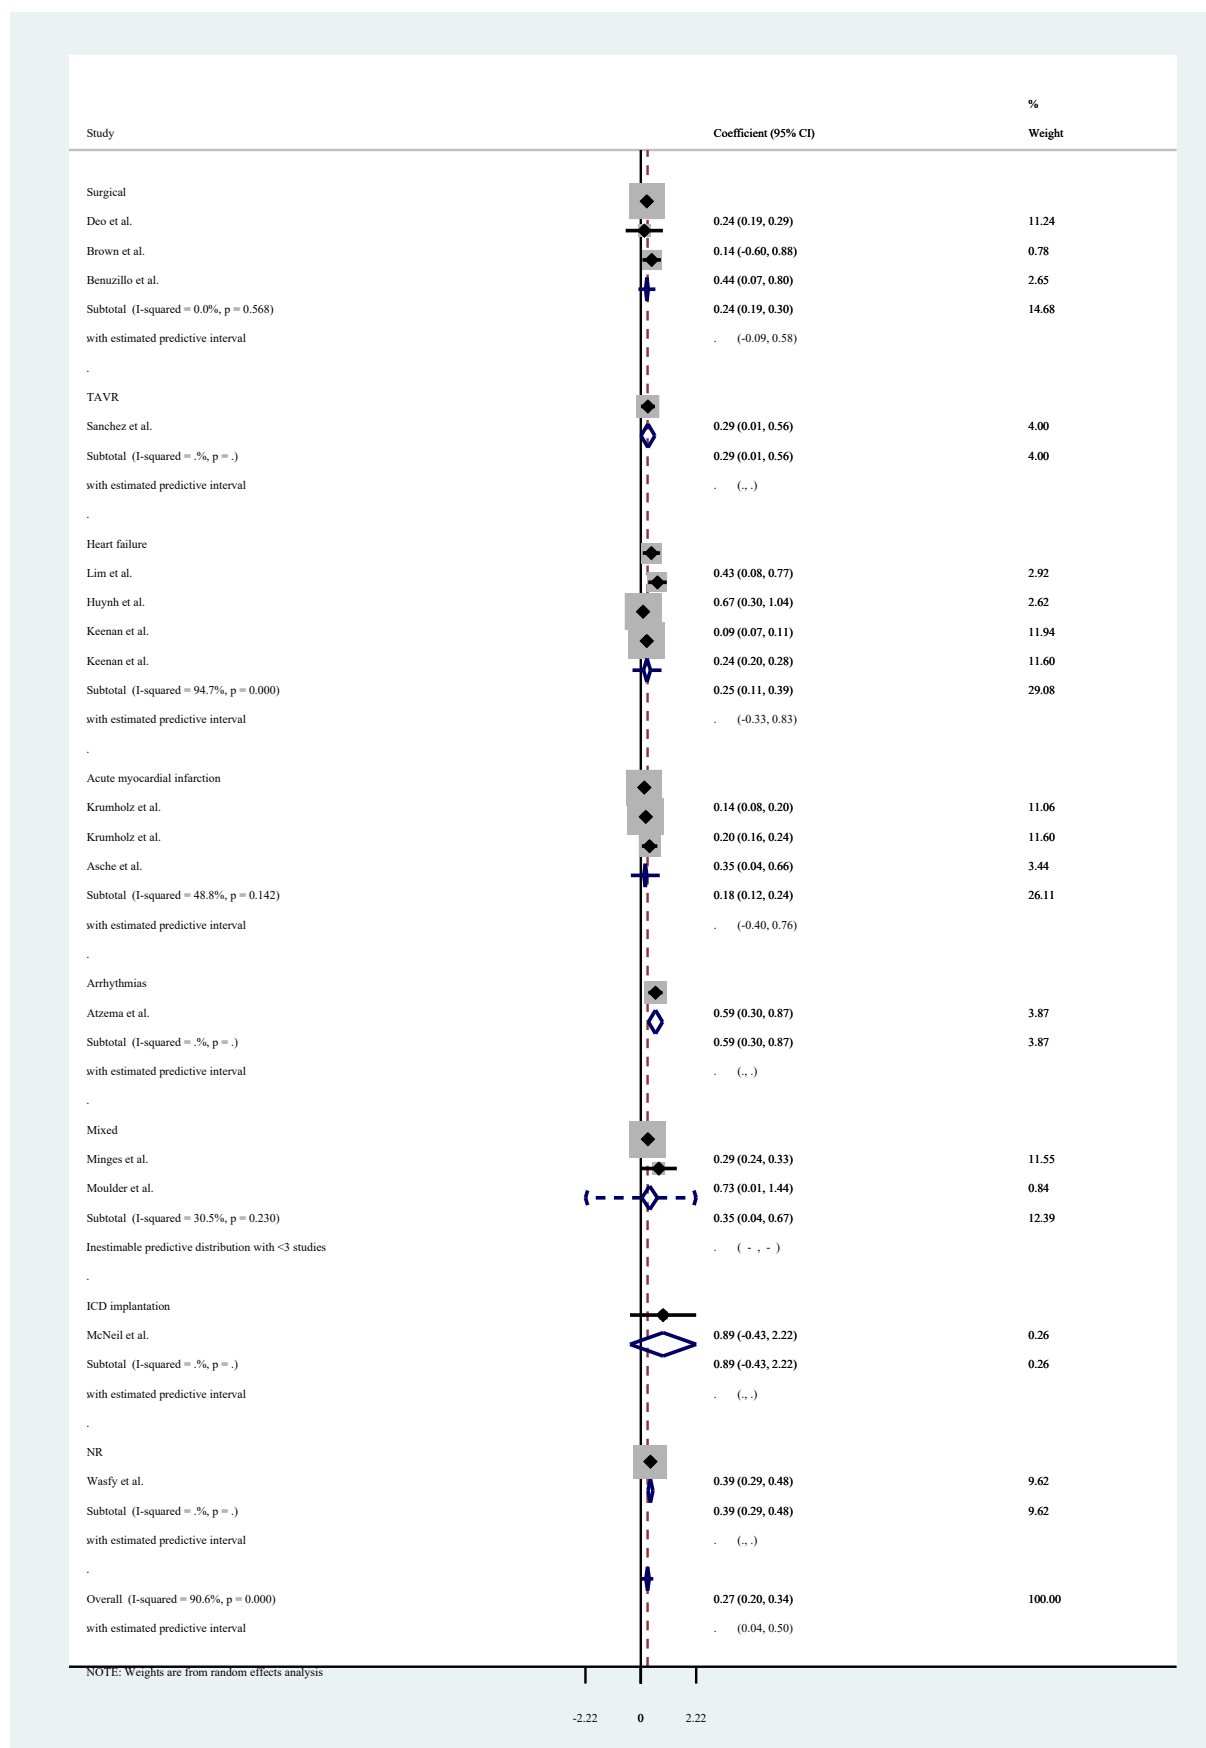

Legend: There was no missing data.

## Supplemental Figure 17. Hypertension as predictor

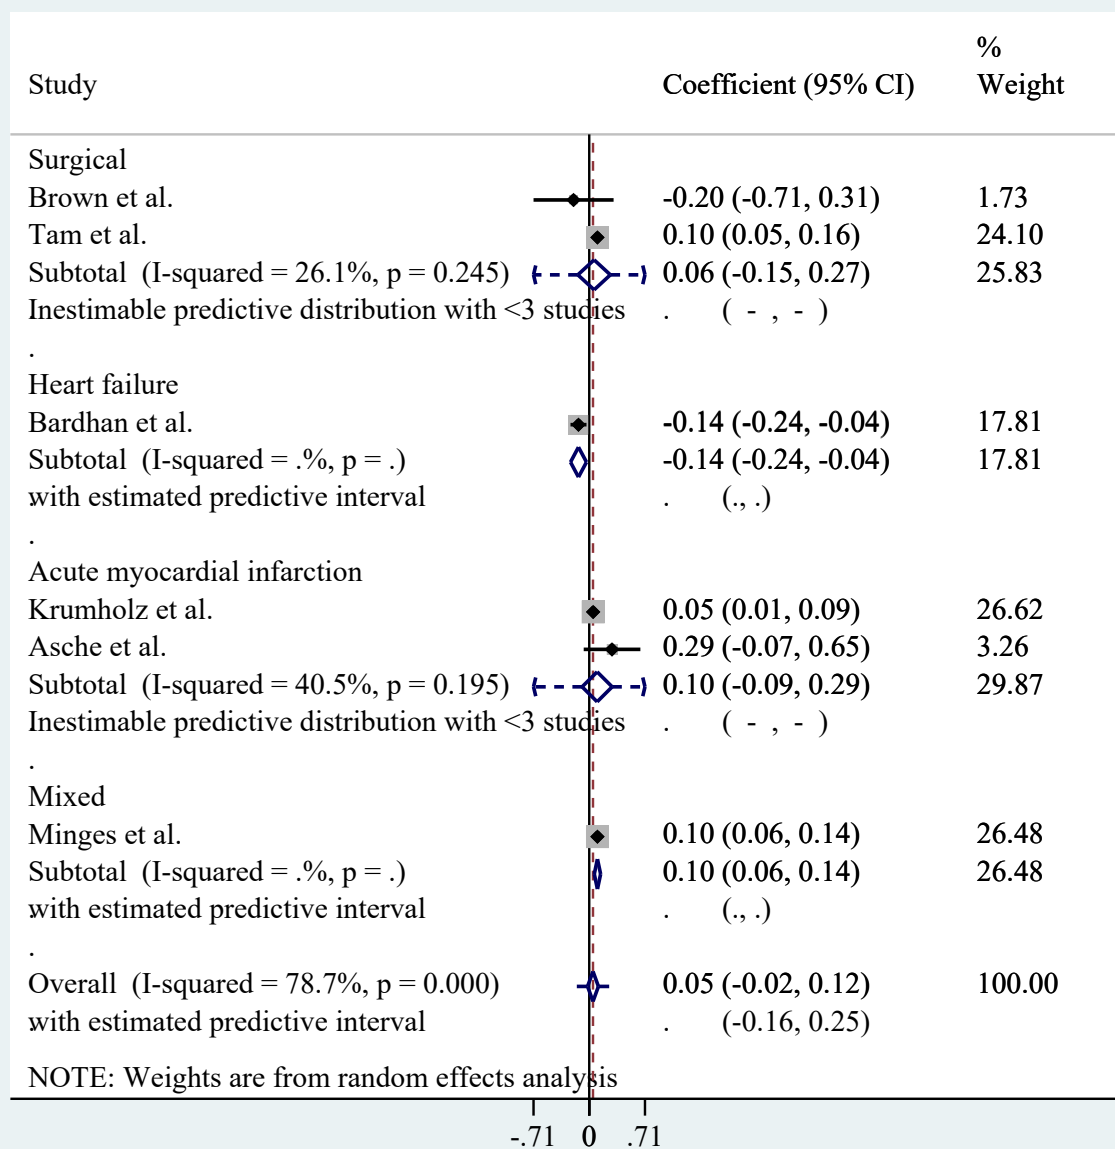

Legend: One study was not included in the analysis because the standard error were missing. The values of their coefficient was: -0.28.

**Supplemental Figure 18. Valve disease as predictor**

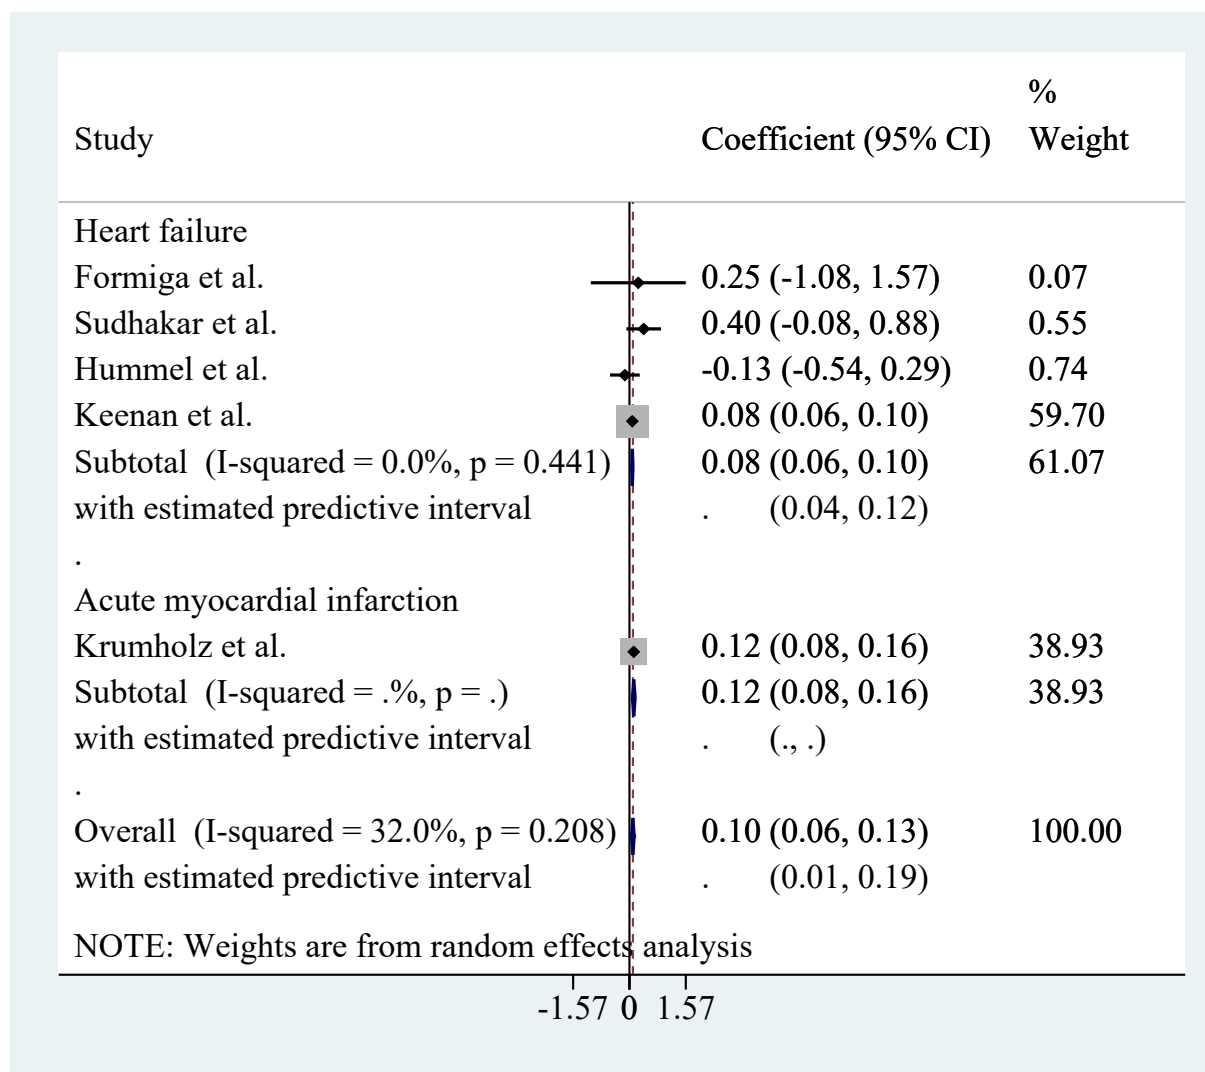

Legend: There was no missing data.

## Supplemental Figure 19. Prior percutaneous coronary intervention as predictor

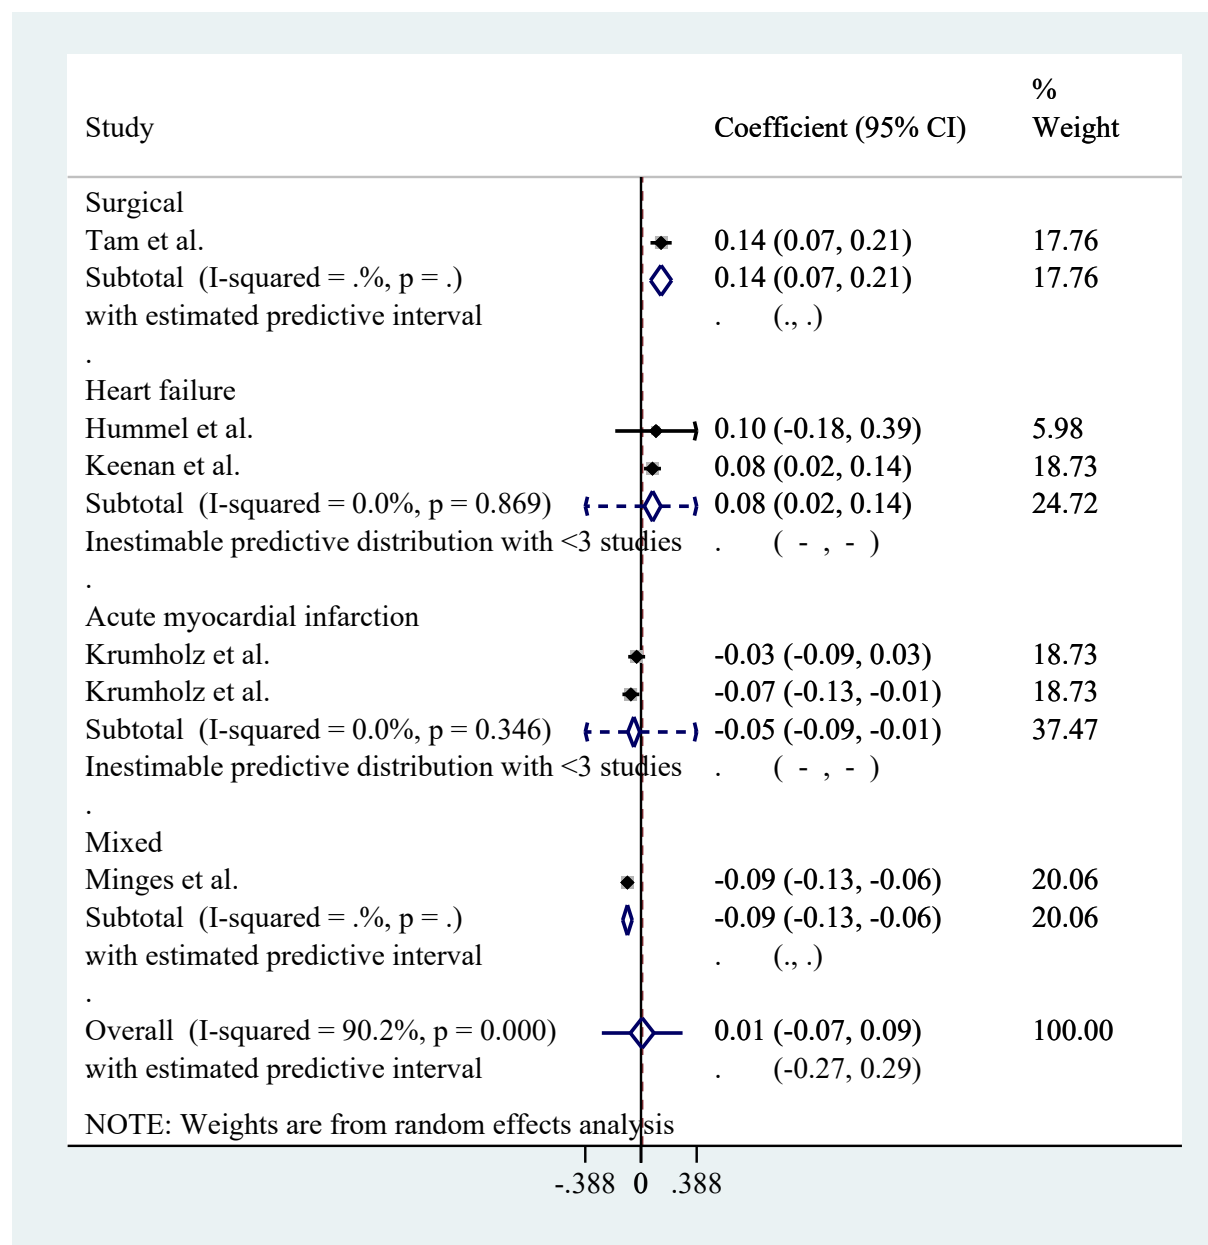

Legend: There was no missing data.

**Supplemental Figure 20. History of heart failure as predictor**

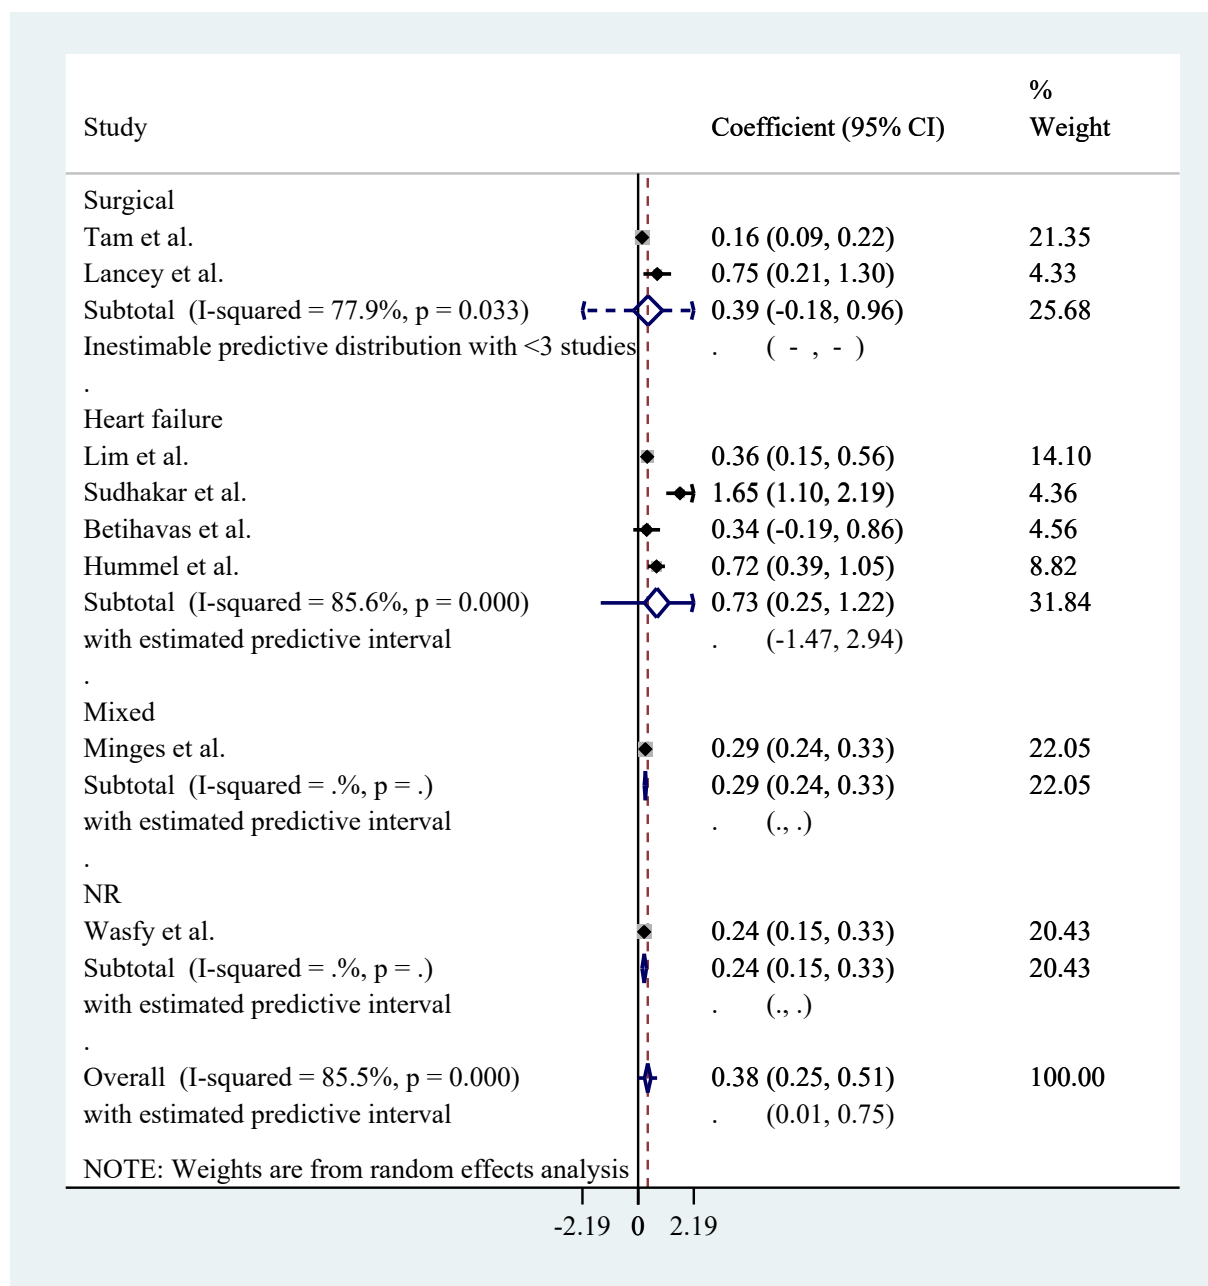

Legend: There was no missing data.

## Supplemental Figure 21. Cerebrovascular disease as predictor

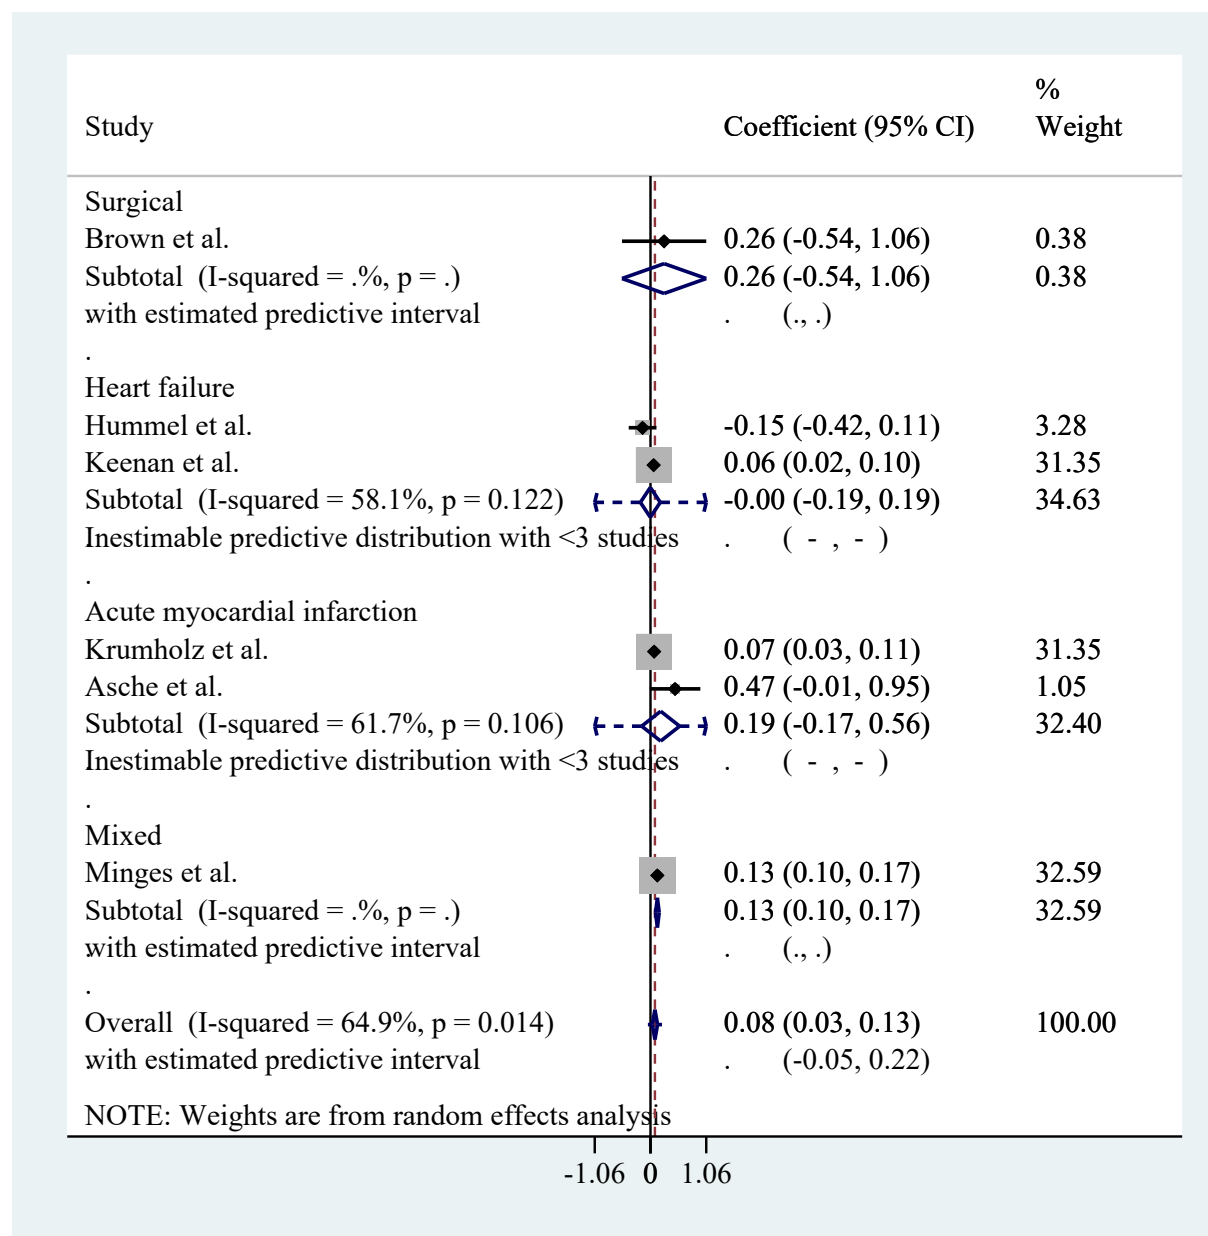

Legend: there was no missing data.

**Supplemental Figure 22. Anemia as predictor**

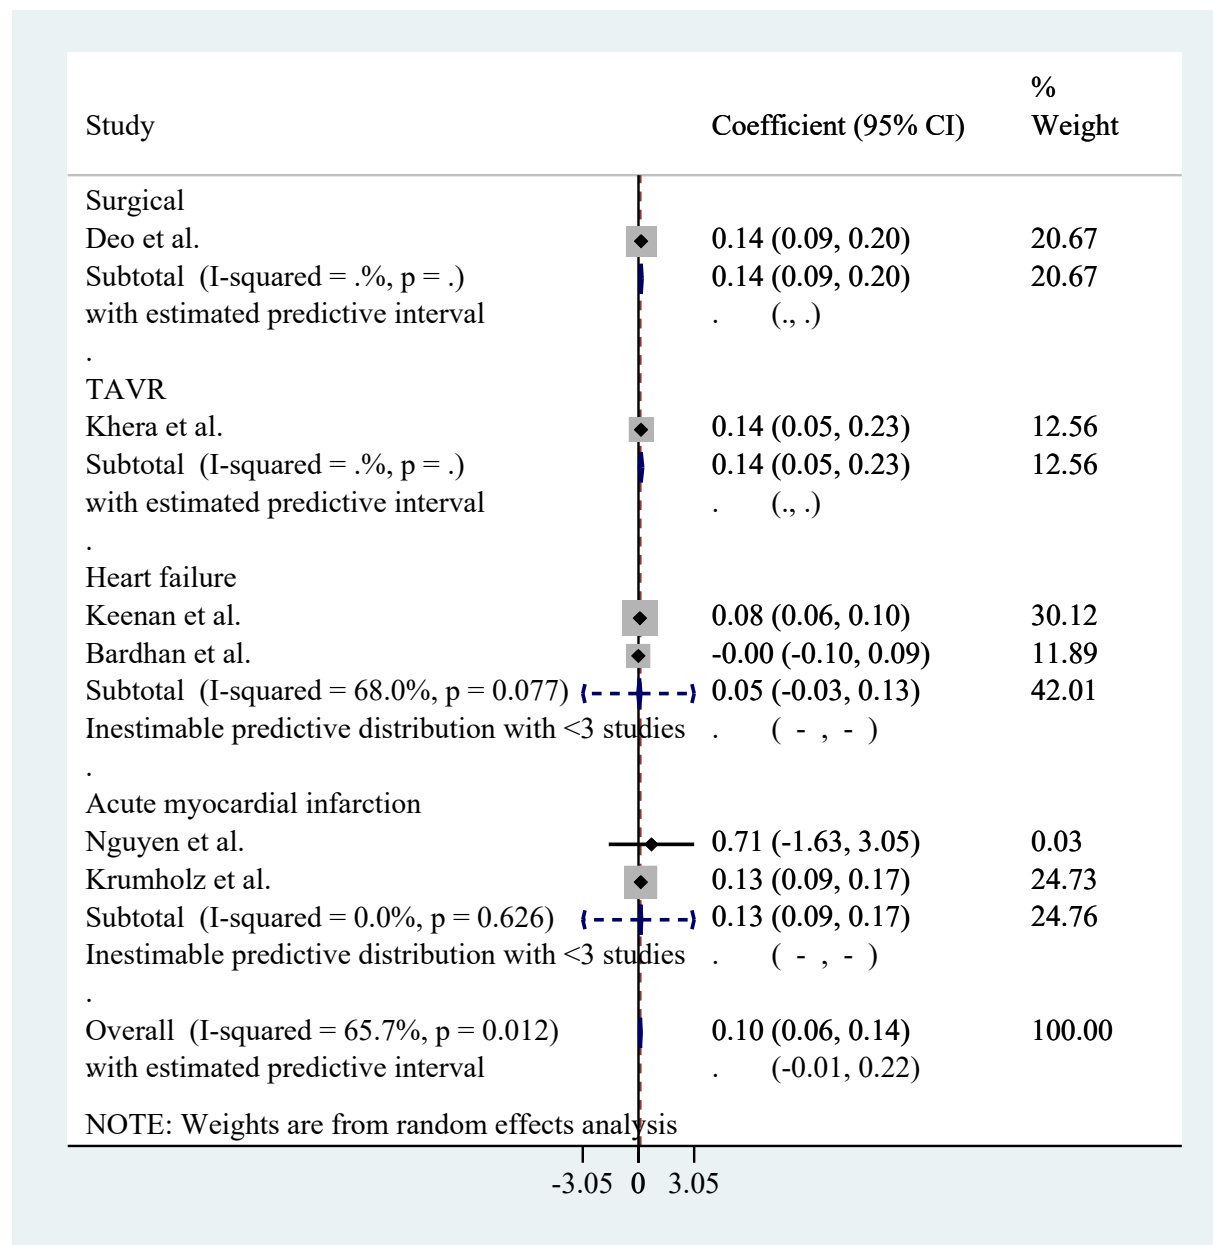

Legend: There was no missing data.

## Supplemental Figure 23. Stroke as predictor

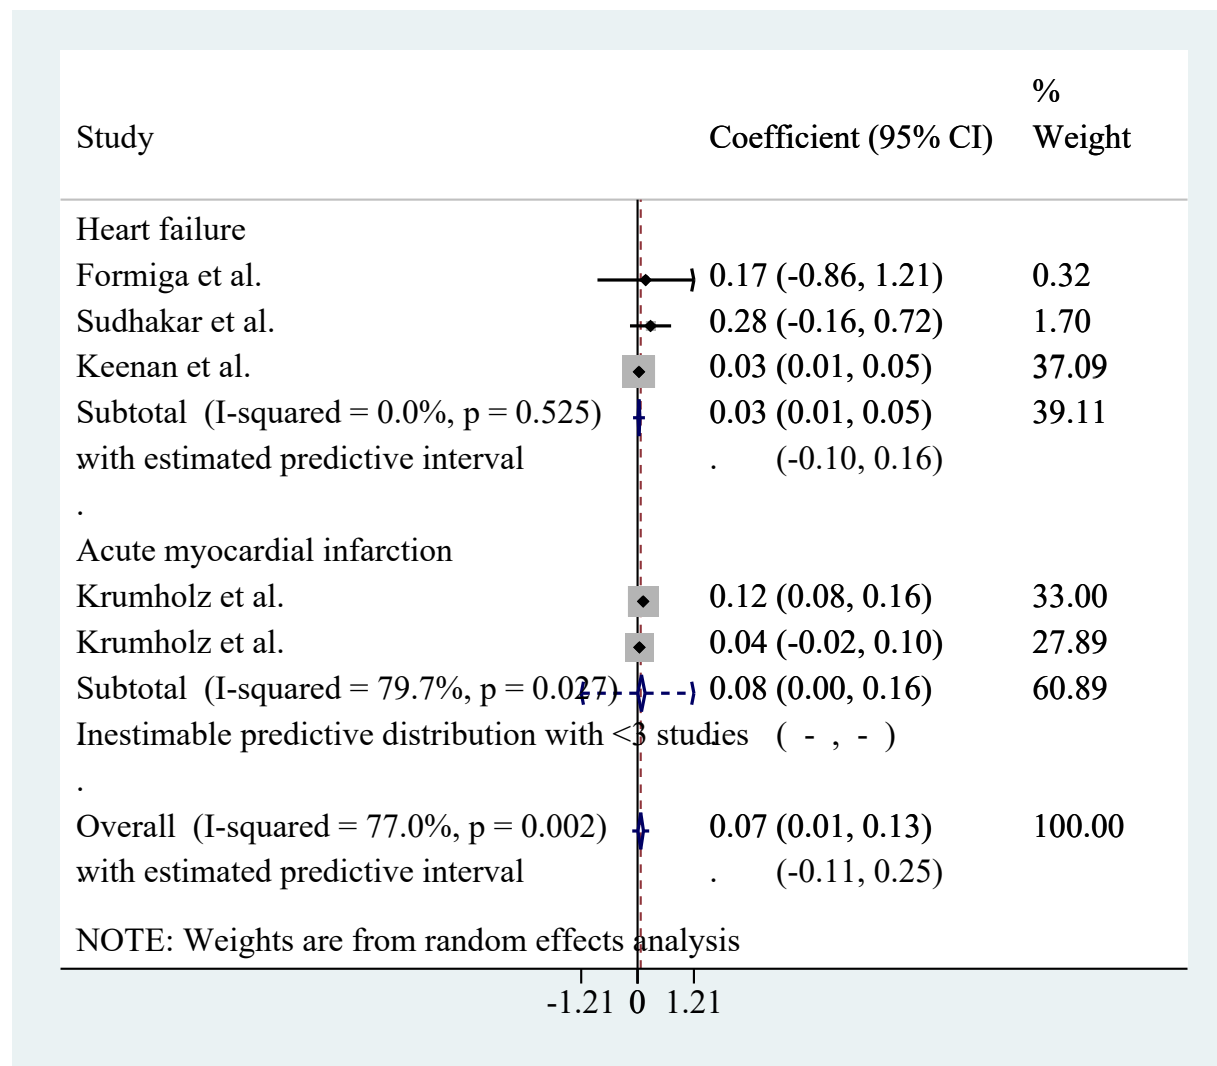

Legend: There was no missing data.



Supplemental Figure 24. Peripheral vascular disease as predictor

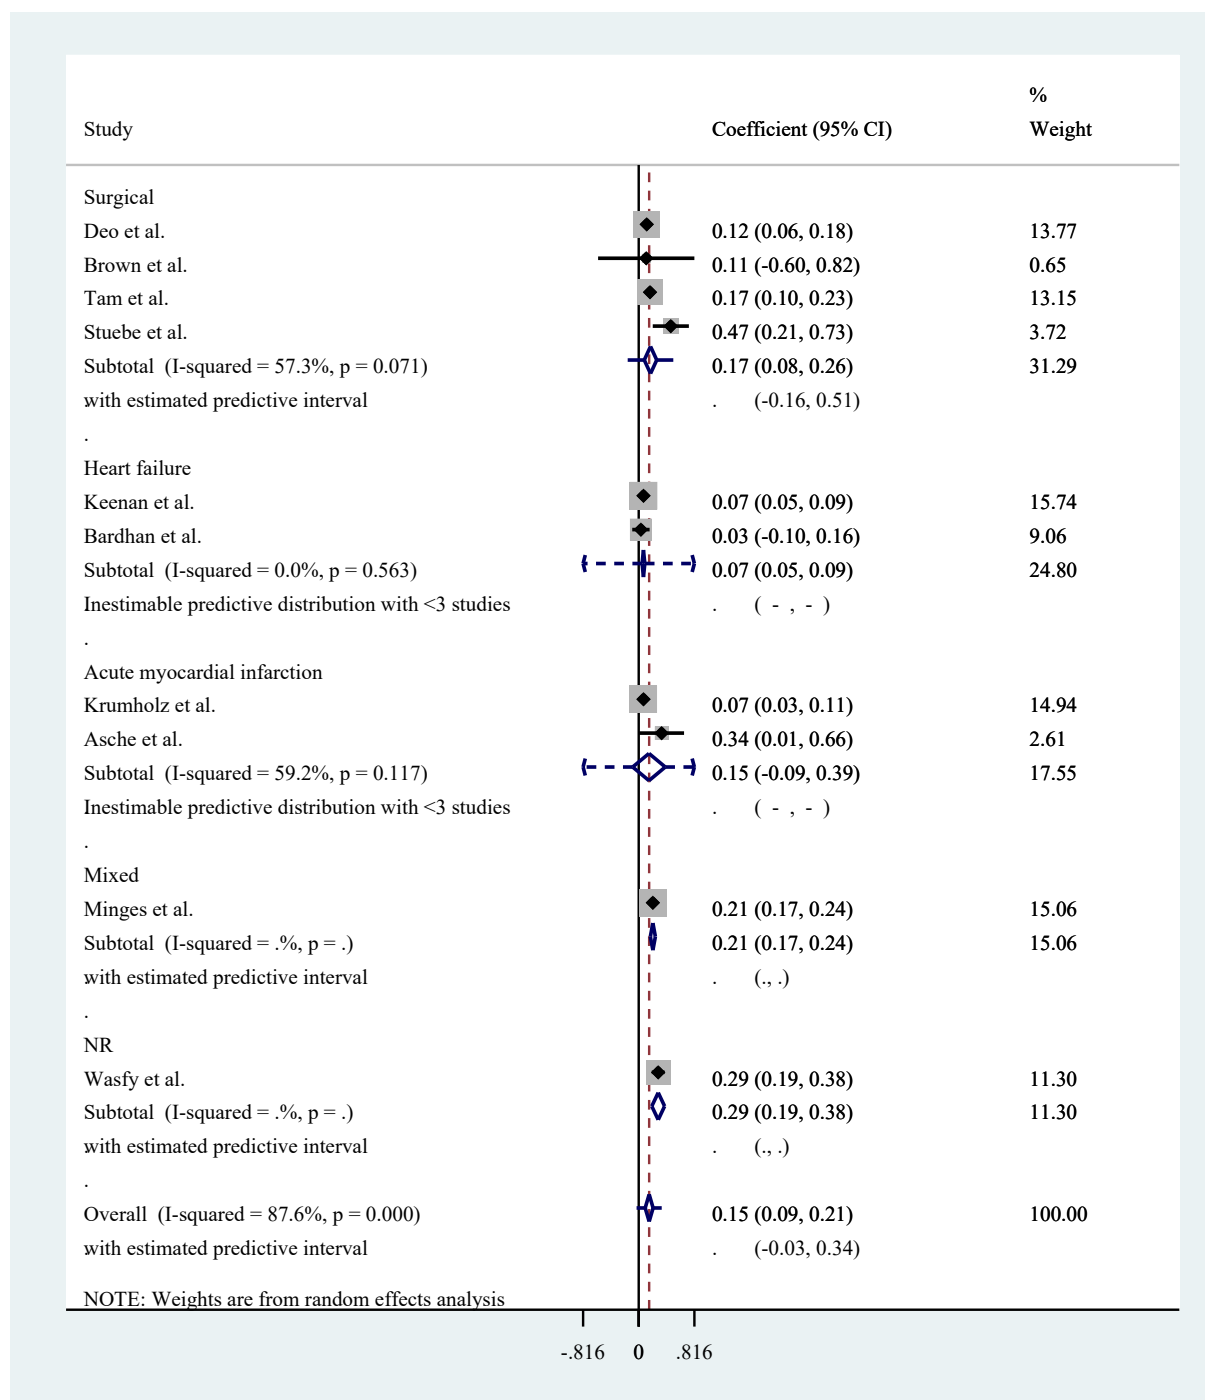

Legend: There was no missing data.

## Supplemental Figure 25. Dementia as predictor

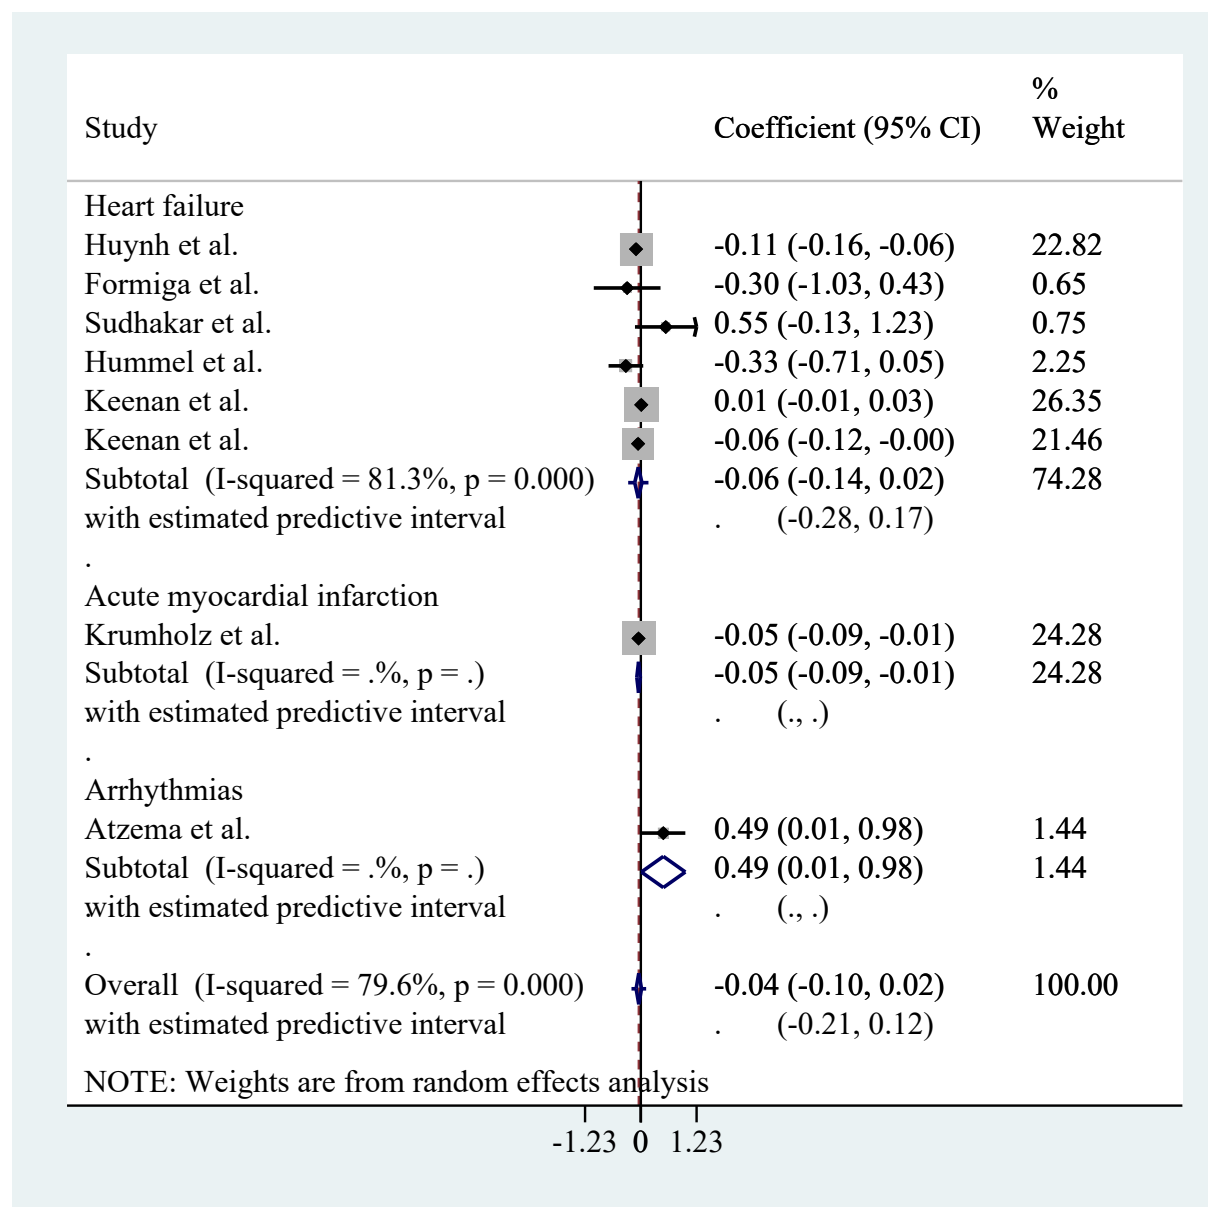

Legend: There was no missing data.

**Supplemental Figure 26. Prior Coronary Artery Bypass Graft as predictor**

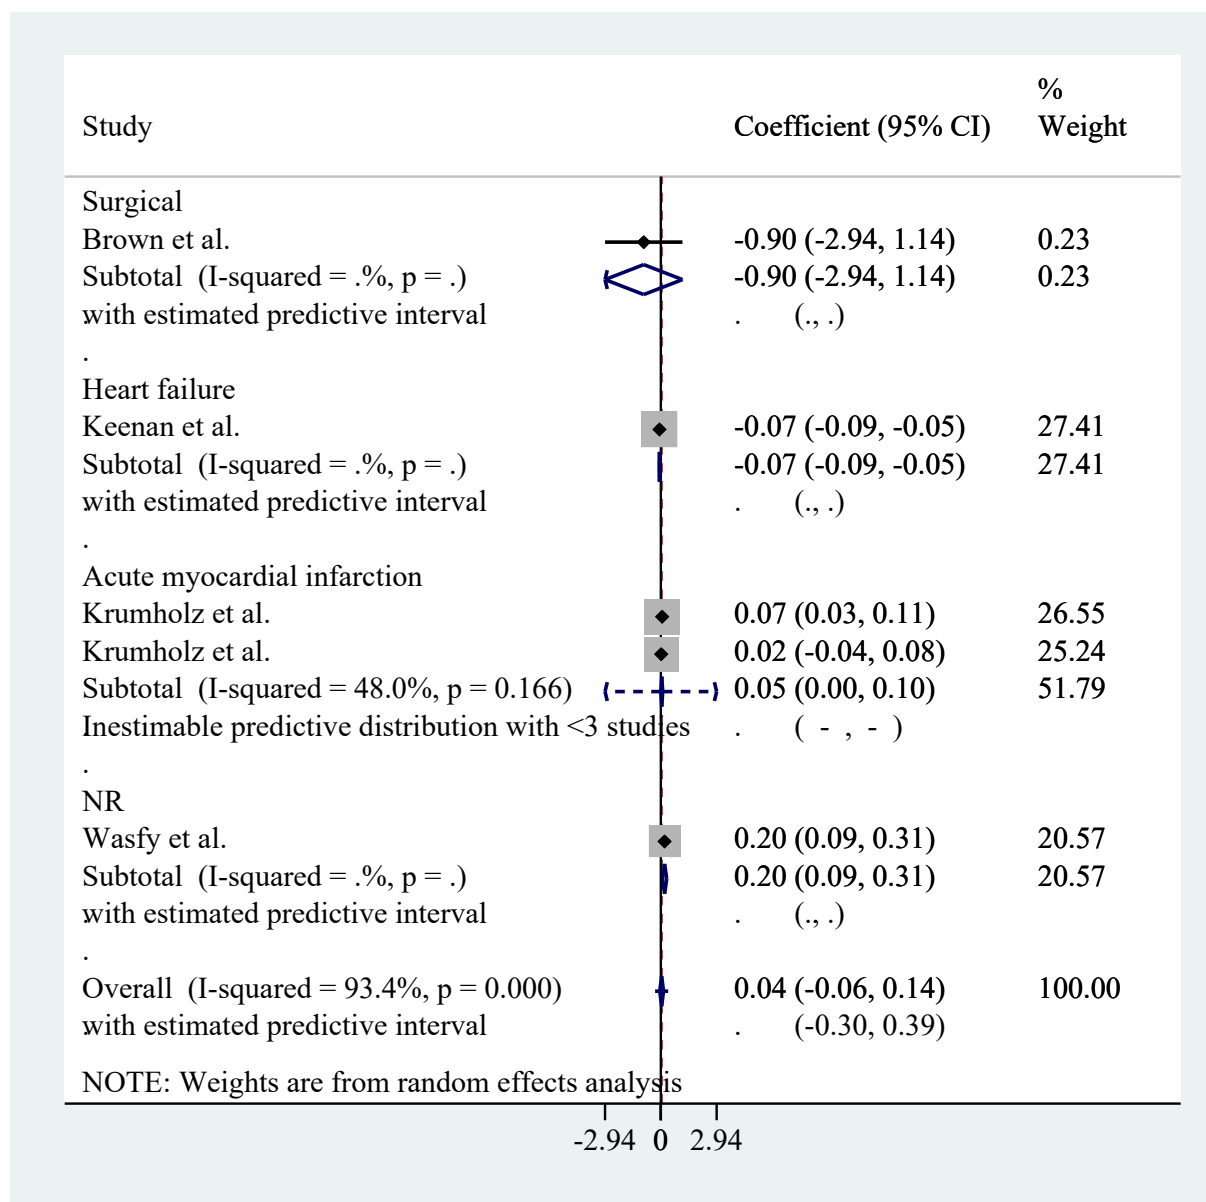

Legend: There was no missing data.

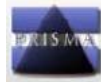

# PRISMA 2009 Checklist

1  
2  
3  
4  
5  
6  
7  
8  
9  
10  
11  
12  
13  
14  
15  
16  
17  
18  
19  
20  
21  
22  
23  
24  
25  
26  
27  
28  
29  
30  
31  
32  
33  
34  
35  
36  
37  
38  
39  
40  
41  
42  
43  
44  
45  
46  
47

| Section/topic                      | #  | Checklist item                                                                                                                                                                                                                                                                                              | Reported on page #    |
|------------------------------------|----|-------------------------------------------------------------------------------------------------------------------------------------------------------------------------------------------------------------------------------------------------------------------------------------------------------------|-----------------------|
| <b>TITLE</b>                       |    |                                                                                                                                                                                                                                                                                                             |                       |
| Title                              | 1  | Identify the report as a systematic review, meta-analysis, or both.                                                                                                                                                                                                                                         | 1                     |
| <b>ABSTRACT</b>                    |    |                                                                                                                                                                                                                                                                                                             |                       |
| Structured summary                 | 2  | Provide a structured summary including, as applicable: background; objectives; data sources; study eligibility criteria, participants, and interventions; study appraisal and synthesis methods; results; limitations; conclusions and implications of key findings; systematic review registration number. | 2                     |
| <b>INTRODUCTION</b>                |    |                                                                                                                                                                                                                                                                                                             |                       |
| Rationale                          | 3  | Describe the rationale for the review in the context of what is already known.                                                                                                                                                                                                                              | 5                     |
| Objectives                         | 4  | Provide an explicit statement of questions being addressed with reference to participants, interventions, comparisons, outcomes, and study design (PICOS).                                                                                                                                                  | 6                     |
| <b>METHODS</b>                     |    |                                                                                                                                                                                                                                                                                                             |                       |
| Protocol and registration          | 5  | Indicate if a review protocol exists, if and where it can be accessed (e.g., Web address), and, if available, provide registration information including registration number.                                                                                                                               | 7                     |
| Eligibility criteria               | 6  | Specify study characteristics (e.g., PICOS, length of follow-up) and report characteristics (e.g., years considered, language, publication status) used as criteria for eligibility, giving rationale.                                                                                                      | 7                     |
| Information sources                | 7  | Describe all information sources (e.g., databases with dates of coverage, contact with study authors to identify additional studies) in the search and date last searched.                                                                                                                                  | 7                     |
| Search                             | 8  | Present full electronic search strategy for at least one database, including any limits used, such that it could be repeated.                                                                                                                                                                               | 7,<br>Supp.<br>Text 1 |
| Study selection                    | 9  | State the process for selecting studies (i.e., screening, eligibility, included in systematic review, and, if applicable, included in the meta-analysis).                                                                                                                                                   | 7,8                   |
| Data collection process            | 10 | Describe method of data extraction from reports (e.g., piloted forms, independently, in duplicate) and any processes for obtaining and confirming data from investigators.                                                                                                                                  | 8                     |
| Data items                         | 11 | List and define all variables for which data were sought (e.g., PICOS, funding sources) and any assumptions and simplifications made.                                                                                                                                                                       | 8,<br>Supp<br>Text 2  |
| Risk of bias in individual studies | 12 | Describe methods used for assessing risk of bias of individual studies (including specification of whether this was done at the study or outcome level), and how this information is to be used in any data synthesis.                                                                                      | 8                     |



# PRISMA 2009 Checklist

|                      |    |                                                                                                                                                           |   |
|----------------------|----|-----------------------------------------------------------------------------------------------------------------------------------------------------------|---|
| Summary measures     | 13 | State the principal summary measures (e.g., risk ratio, difference in means).                                                                             | 8 |
| Synthesis of results | 14 | Describe the methods of handling data and combining results of studies, if done, including measures of consistency (e.g., $I^2$ ) for each meta-analysis. | 9 |

Page 1 of 2

| Section/topic                 | #  | Checklist item                                                                                                                                                                                           | Reported on page #                            |
|-------------------------------|----|----------------------------------------------------------------------------------------------------------------------------------------------------------------------------------------------------------|-----------------------------------------------|
| Risk of bias across studies   | 15 | Specify any assessment of risk of bias that may affect the cumulative evidence (e.g., publication bias, selective reporting within studies).                                                             | NA                                            |
| Additional analyses           | 16 | Describe methods of additional analyses (e.g., sensitivity or subgroup analyses, meta-regression), if done, indicating which were pre-specified.                                                         | 9                                             |
| <b>RESULTS</b>                |    |                                                                                                                                                                                                          |                                               |
| Study selection               | 17 | Give numbers of studies screened, assessed for eligibility, and included in the review, with reasons for exclusions at each stage, ideally with a flow diagram.                                          | 10, Fig 1                                     |
| Study characteristics         | 18 | For each study, present characteristics for which data were extracted (e.g., study size, PICOS, follow-up period) and provide the citations.                                                             | 10-18, Table 1                                |
| Risk of bias within studies   | 19 | Present data on risk of bias of each study and, if available, any outcome level assessment (see item 12).                                                                                                | 19, Fig 2, Supp. Table 1                      |
| Results of individual studies | 20 | For all outcomes considered (benefits or harms), present, for each study: (a) simple summary data for each intervention group (b) effect estimates and confidence intervals, ideally with a forest plot. | 19-29, Table 2                                |
| Synthesis of results          | 21 | Present results of each meta-analysis done, including confidence intervals and measures of consistency.                                                                                                  | 20, Fig 3 and 4, Supp. Table 3, Supp. Fig 1-6 |
| Risk of bias across studies   | 22 | Present results of any assessment of risk of bias across studies (see Item 15).                                                                                                                          | NA                                            |
| Additional analysis           | 23 | Give results of additional analyses, if done (e.g., sensitivity or subgroup analyses, meta-regression [see Item 16]).                                                                                    | 19, 20, 29<br>Supp. Table 2, Supp. Fig        |

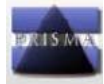

# PRISMA 2009 Checklist

1  
2  
3  
4  
5  
6  
7  
8  
9  
10  
11  
12  
13  
14  
15  
16  
17  
18  
19  
20  
21  
22  
23  
24  
25  
26  
27  
28  
29  
30  
31  
32  
33  
34  
35  
36  
37  
38  
39  
40  
41  
42  
43  
44  
45  
46  
47

|                     |    |                                                                                                                                                                                      |        |
|---------------------|----|--------------------------------------------------------------------------------------------------------------------------------------------------------------------------------------|--------|
|                     |    |                                                                                                                                                                                      | 7-26   |
| <b>DISCUSSION</b>   |    |                                                                                                                                                                                      |        |
| Summary of evidence | 24 | Summarize the main findings including the strength of evidence for each main outcome; consider their relevance to key groups (e.g., healthcare providers, users, and policy makers). | 30-32  |
| Limitations         | 25 | Discuss limitations at study and outcome level (e.g., risk of bias), and at review-level (e.g., incomplete retrieval of identified research, reporting bias).                        | 32, 33 |
| Conclusions         | 26 | Provide a general interpretation of the results in the context of other evidence, and implications for future research.                                                              | 33     |
| <b>FUNDING</b>      |    |                                                                                                                                                                                      |        |
| Funding             | 27 | Describe sources of funding for the systematic review and other support (e.g., supply of data); role of funders for the systematic review.                                           | 134    |

From: Moher D, Liberati A, Tetzlaff J, Altman DG, The PRISMA Group (2009). Preferred Reporting Items for Systematic Reviews and Meta-Analyses: The PRISMA Statement. PLoS Med 6(6): e1000097. doi:10.1371/journal.pmed1000097

For more information, visit: [www.prisma-statement.org](http://www.prisma-statement.org).

Page 2 of 2
