# Supplementary material for: Prediction models for hospital readmissions in patients with heart disease: a systematic review and meta-analysis
Source: PubMed Central journal article supplement — BMJ Open. 2021 Aug 17;11(8):e047576. doi: 10.1136/bmjopen-2020-047576 (PMC8372817; doi:10.1136/bmjopen-2020-047576), 2021-08-17
Supplement: bmjopen-2020-047576supp001.pdf [file bmjopen-2020-047576supp001.pdf]

## Supplemental materials

Supplemental Text 1. Search string

Supplemental Text 2. Data items

Supplemental Table 1A. Risk of bias

Supplemental Figure 1. Meta-analysis of CMS AMI administrative model

Supplemental Figure 2. Meta-analysis of CMS HF administrative model

Supplemental Figure 3. Meta-analysis of CMS medical model

Supplemental Figure 4. Meta-analysis of HOSPITAL score

Supplemental Figure 5. Meta-analysis of GRACE

Supplemental Figure 6. Meta-analysis of LACE

Supplemental Figure 7. Age as moderator

Supplemental Figure 8. Number of predictors as moderator

Supplemental Table 1B. Subgroup analyses

Supplemental Table 2A. Summary of meta-analyses predictors

Supplemental Figure 9. Age as predictor

Supplemental Figure 10. Female as predictor

Supplemental Figure 11. Arrhythmias as predictor

Supplemental Figure 12. Chronic lung disease as predictor

Supplemental Figure 13. Chronic Obstructive Pulmonary Disease as predictor

Supplemental Figure 14. Atherosclerosis as predictor

Supplemental Figure 15. Diabetes Mellitus as predictor

Supplemental Figure 16. Current heart failure as predictor

Supplemental Figure 17. Hypertension as predictor

Supplemental Figure 18. Valve disease as predictor

Supplemental Figure 19. Prior percutaneous coronary intervention as predictor

Supplemental Figure 20. History of heart failure as predictor

Supplemental Figure 21. Cerebrovascular disease as predictor

Supplemental Figure 22. Anemia as predictor

Supplemental Figure 23. Stroke as predictor

Supplemental Figure 24. Peripheral vascular disease as predictor

Supplemental Figure 25. Dementia as predictor

Supplemental Figure 26. Prior Coronary Artery Bypass Graft as predictor

**Supplemental Text 1. Search string****Ovid MEDLINE(R) ALL 1946 to November 21, 2019****Search date: 25 August 2020**

| #  | Searches                                                                                                                                                                                                                                                                                                                                                                                                                                                                                                                                                                                                                                                                                                                                                                                                                                                                                                                                                                                                                                                                                                                                                                                                                                     | Results |
|----|----------------------------------------------------------------------------------------------------------------------------------------------------------------------------------------------------------------------------------------------------------------------------------------------------------------------------------------------------------------------------------------------------------------------------------------------------------------------------------------------------------------------------------------------------------------------------------------------------------------------------------------------------------------------------------------------------------------------------------------------------------------------------------------------------------------------------------------------------------------------------------------------------------------------------------------------------------------------------------------------------------------------------------------------------------------------------------------------------------------------------------------------------------------------------------------------------------------------------------------------|---------|
| 1  | exp "predictive value of tests"/ or roc curve/ or exp Decision Support Techniques/                                                                                                                                                                                                                                                                                                                                                                                                                                                                                                                                                                                                                                                                                                                                                                                                                                                                                                                                                                                                                                                                                                                                                           | 321482  |
| 2  | ("signal to noise" or roc curve or reiver operating or predict*).ab,kf,ti.                                                                                                                                                                                                                                                                                                                                                                                                                                                                                                                                                                                                                                                                                                                                                                                                                                                                                                                                                                                                                                                                                                                                                                   | 1644590 |
| 3  | (decision adj2 (aid? or model* or clinical* or support or system? or tool?)).ab,kf,ti.                                                                                                                                                                                                                                                                                                                                                                                                                                                                                                                                                                                                                                                                                                                                                                                                                                                                                                                                                                                                                                                                                                                                                       | 56262   |
| 4  | decision?.ab,kf,ti.                                                                                                                                                                                                                                                                                                                                                                                                                                                                                                                                                                                                                                                                                                                                                                                                                                                                                                                                                                                                                                                                                                                                                                                                                          | 381353  |
| 5  | logistic models/                                                                                                                                                                                                                                                                                                                                                                                                                                                                                                                                                                                                                                                                                                                                                                                                                                                                                                                                                                                                                                                                                                                                                                                                                             | 139814  |
| 6  | (logistic model* or regression).ab,kf,ti.                                                                                                                                                                                                                                                                                                                                                                                                                                                                                                                                                                                                                                                                                                                                                                                                                                                                                                                                                                                                                                                                                                                                                                                                    | 758909  |
| 7  | 5 or 6                                                                                                                                                                                                                                                                                                                                                                                                                                                                                                                                                                                                                                                                                                                                                                                                                                                                                                                                                                                                                                                                                                                                                                                                                                       | 814876  |
| 8  | 4 and 7                                                                                                                                                                                                                                                                                                                                                                                                                                                                                                                                                                                                                                                                                                                                                                                                                                                                                                                                                                                                                                                                                                                                                                                                                                      | 23040   |
| 9  | or/1-3,8                                                                                                                                                                                                                                                                                                                                                                                                                                                                                                                                                                                                                                                                                                                                                                                                                                                                                                                                                                                                                                                                                                                                                                                                                                     | 1861041 |
| 10 | patient readmission/                                                                                                                                                                                                                                                                                                                                                                                                                                                                                                                                                                                                                                                                                                                                                                                                                                                                                                                                                                                                                                                                                                                                                                                                                         | 17534   |
| 11 | ((readmission or readmitted or re-admission or re-admitted) and (hospital* or prehospita*)).ab,kf,ti.                                                                                                                                                                                                                                                                                                                                                                                                                                                                                                                                                                                                                                                                                                                                                                                                                                                                                                                                                                                                                                                                                                                                        | 20747   |
| 12 | ((readmission or readmitted or re-admission or re-admitted) adj2 (patient? or client)).ab,kf,ti.                                                                                                                                                                                                                                                                                                                                                                                                                                                                                                                                                                                                                                                                                                                                                                                                                                                                                                                                                                                                                                                                                                                                             | 4515    |
| 13 | (rehospitali?ation? or re-hospitali?ation? or rehospitali?ed or re-hospitali?ed).ab,kf,ti.                                                                                                                                                                                                                                                                                                                                                                                                                                                                                                                                                                                                                                                                                                                                                                                                                                                                                                                                                                                                                                                                                                                                                   | 7834    |
| 14 | or/10-13                                                                                                                                                                                                                                                                                                                                                                                                                                                                                                                                                                                                                                                                                                                                                                                                                                                                                                                                                                                                                                                                                                                                                                                                                                     | 35723   |
| 15 | exp cardiovascular system/ or exp cardiovascular diseases/                                                                                                                                                                                                                                                                                                                                                                                                                                                                                                                                                                                                                                                                                                                                                                                                                                                                                                                                                                                                                                                                                                                                                                                   | 3001695 |
| 16 | (cardiac* or cardio* or myocard* or coronary or heart).ab,jw,kf,ti.                                                                                                                                                                                                                                                                                                                                                                                                                                                                                                                                                                                                                                                                                                                                                                                                                                                                                                                                                                                                                                                                                                                                                                          | 2161260 |
| 17 | (diastolic or systolic or edema or dyspnea or renocardiac or Stenocardia* or angor or angina* or atheroscleros* or atheroscleros* or arteroscleros* or Arterioscleros* or Kounis syndrome or ST elevation or STEMI or valve* or aortic or stenosis or Leopard Syndrome or Noonan Syndrome with Multiple Lentigines or Multiple Lentigines Syndrome or Obstructive Subaortic Conus or Absent Right Atrioventricular Connection or arrhythmia* or sinus or sinoatrial or atria* or auricular or atrioventricular or ventricular or bradycardia or Bradyarrhythmia* or tachycardia* or fibrillation* or flutter* or Right Bundle Branch Block or Brugada or extrasystole* or (commotion adj1 cordis) or Auriculo-Ventricular Dissociation or Auriculo Ventricular Dissociation or Atrioventricular Dissociation or A-V Dissociation or AV Dissociation or syncope or (Andersen adj2 Tawil) or QT Syndrome or (jervell adj2 lange) or Prolonged QT Interval or (romano adj1 ward) or parasystole or Pre-Excitation or Preexcitation or (Lown adj2 Ganong) or Short PR-Normal QRS Complex Syndrome or Short PR Normal QRS Complex Syndrome or Wolff-Parkinson-White or WPW Syndrome or Idioventricular Rhythm or Torsade de Pointes).ab,hw,kf,ti. | 1642025 |
| 18 | or/15-17                                                                                                                                                                                                                                                                                                                                                                                                                                                                                                                                                                                                                                                                                                                                                                                                                                                                                                                                                                                                                                                                                                                                                                                                                                     | 4136701 |
| 19 | (predict* adj3 risk?).ab,kf,ti.                                                                                                                                                                                                                                                                                                                                                                                                                                                                                                                                                                                                                                                                                                                                                                                                                                                                                                                                                                                                                                                                                                                                                                                                              | 57669   |
| 20 | retrospective.ab,hw,kf,ti.                                                                                                                                                                                                                                                                                                                                                                                                                                                                                                                                                                                                                                                                                                                                                                                                                                                                                                                                                                                                                                                                                                                                                                                                                   | 1006259 |
| 21 | (admission or hospitali?ation or discharge).ab,hw,kf,ti.                                                                                                                                                                                                                                                                                                                                                                                                                                                                                                                                                                                                                                                                                                                                                                                                                                                                                                                                                                                                                                                                                                                                                                                     | 529444  |
| 22 | and/18-21                                                                                                                                                                                                                                                                                                                                                                                                                                                                                                                                                                                                                                                                                                                                                                                                                                                                                                                                                                                                                                                                                                                                                                                                                                    | 692     |
| 23 | and/9,14,18                                                                                                                                                                                                                                                                                                                                                                                                                                                                                                                                                                                                                                                                                                                                                                                                                                                                                                                                                                                                                                                                                                                                                                                                                                  | 3482    |
| 24 | (ISRCTN96643197 or ChiCTR1900026250 or NCT04008914 or NCT03791541 or NCT03300791 or "CTRI/2016/10/007411" or "CTRI/2014/06/004690" or NCT03949439 or NCT03905226 or NCT00344513 or NCT01755052 or NCT02041585).ab,kf,ti.                                                                                                                                                                                                                                                                                                                                                                                                                                                                                                                                                                                                                                                                                                                                                                                                                                                                                                                                                                                                                     | 9       |
| 25 | ((OPERA or REIC or FIgARO or PREDIC or optimize-hf or ten-hms or tele-hf or readmits or silver-ami or dc promis or KorAHF) adj3 (trial or study)).ab,kf,ti.                                                                                                                                                                                                                                                                                                                                                                                                                                                                                                                                                                                                                                                                                                                                                                                                                                                                                                                                                                                                                                                                                  | 118     |
| 26 | or/22-25                                                                                                                                                                                                                                                                                                                                                                                                                                                                                                                                                                                                                                                                                                                                                                                                                                                                                                                                                                                                                                                                                                                                                                                                                                     | 4209    |

**Ovid Embase Classic+Embase <1947 to 2020 August 24>****Search date: 25 August 2020**

| #  | Searches                                                                                                                                                                                                                                                                                                                                                                                                                                                                                                                                                                                                                                                                                                                                                                                                                                                                                                                                                                                                                                                                                                                                                                                                                                     | Results |
|----|----------------------------------------------------------------------------------------------------------------------------------------------------------------------------------------------------------------------------------------------------------------------------------------------------------------------------------------------------------------------------------------------------------------------------------------------------------------------------------------------------------------------------------------------------------------------------------------------------------------------------------------------------------------------------------------------------------------------------------------------------------------------------------------------------------------------------------------------------------------------------------------------------------------------------------------------------------------------------------------------------------------------------------------------------------------------------------------------------------------------------------------------------------------------------------------------------------------------------------------------|---------|
| 1  | *predictive value/ or *receiver operating characteristic/ or exp *Decision Support system/                                                                                                                                                                                                                                                                                                                                                                                                                                                                                                                                                                                                                                                                                                                                                                                                                                                                                                                                                                                                                                                                                                                                                   | 21786   |
| 2  | ("signal to noise" or roc curve or reiver operating or predict*).ab,kw,ti.                                                                                                                                                                                                                                                                                                                                                                                                                                                                                                                                                                                                                                                                                                                                                                                                                                                                                                                                                                                                                                                                                                                                                                   | 2224346 |
| 3  | (decision adj2 (aid? or model* or clinical* or support or system? or tool?)).ab,kw,ti.                                                                                                                                                                                                                                                                                                                                                                                                                                                                                                                                                                                                                                                                                                                                                                                                                                                                                                                                                                                                                                                                                                                                                       | 80866   |
| 4  | decision?.ab,kw,ti.                                                                                                                                                                                                                                                                                                                                                                                                                                                                                                                                                                                                                                                                                                                                                                                                                                                                                                                                                                                                                                                                                                                                                                                                                          | 531706  |
| 5  | *logistic regression analysis/                                                                                                                                                                                                                                                                                                                                                                                                                                                                                                                                                                                                                                                                                                                                                                                                                                                                                                                                                                                                                                                                                                                                                                                                               | 1018    |
| 6  | (logistic model* or regression).ab,kw,ti.                                                                                                                                                                                                                                                                                                                                                                                                                                                                                                                                                                                                                                                                                                                                                                                                                                                                                                                                                                                                                                                                                                                                                                                                    | 1107281 |
| 7  | 5 or 6                                                                                                                                                                                                                                                                                                                                                                                                                                                                                                                                                                                                                                                                                                                                                                                                                                                                                                                                                                                                                                                                                                                                                                                                                                       | 1107307 |
| 8  | 4 and 7                                                                                                                                                                                                                                                                                                                                                                                                                                                                                                                                                                                                                                                                                                                                                                                                                                                                                                                                                                                                                                                                                                                                                                                                                                      | 33059   |
| 9  | or/1-3,8                                                                                                                                                                                                                                                                                                                                                                                                                                                                                                                                                                                                                                                                                                                                                                                                                                                                                                                                                                                                                                                                                                                                                                                                                                     | 2305864 |
| 10 | *hospital readmission/                                                                                                                                                                                                                                                                                                                                                                                                                                                                                                                                                                                                                                                                                                                                                                                                                                                                                                                                                                                                                                                                                                                                                                                                                       | 13570   |
| 11 | ((readmission or readmitted or re-admission or re-admitted) and (hospital* or prehospita*)).ab,kw,ti.                                                                                                                                                                                                                                                                                                                                                                                                                                                                                                                                                                                                                                                                                                                                                                                                                                                                                                                                                                                                                                                                                                                                        | 39681   |
| 12 | ((readmission or readmitted or re-admission or re-admitted) adj2 (patient? or client)).ab,kw,ti.                                                                                                                                                                                                                                                                                                                                                                                                                                                                                                                                                                                                                                                                                                                                                                                                                                                                                                                                                                                                                                                                                                                                             | 9596    |
| 13 | (rehospitali?ation? or re-hospitali?ation? or rehospitali?ed or re-hospitali?ed).ab,kw,ti.                                                                                                                                                                                                                                                                                                                                                                                                                                                                                                                                                                                                                                                                                                                                                                                                                                                                                                                                                                                                                                                                                                                                                   | 14392   |
| 14 | or/10-13                                                                                                                                                                                                                                                                                                                                                                                                                                                                                                                                                                                                                                                                                                                                                                                                                                                                                                                                                                                                                                                                                                                                                                                                                                     | 56536   |
| 15 | exp *cardiovascular system/                                                                                                                                                                                                                                                                                                                                                                                                                                                                                                                                                                                                                                                                                                                                                                                                                                                                                                                                                                                                                                                                                                                                                                                                                  | 630584  |
| 16 | (cardiac* or cardio* or myocard* or coronary or heart).ab,jw,kw,ti.                                                                                                                                                                                                                                                                                                                                                                                                                                                                                                                                                                                                                                                                                                                                                                                                                                                                                                                                                                                                                                                                                                                                                                          | 3123455 |
| 17 | (diastolic or systolic or edema or dyspnea or renocardiac or Stenocardia* or angor or angina* or atheroscleros* or atheroscleros* or arteroscleros* or Arterioscleros* or Kounis syndrome or ST elevation or STEMI or valve* or aortic or stenosis or Leopard Syndrome or Noonan Syndrome with Multiple Lentiginos or Multiple Lentiginos Syndrome or Obstructive Subaortic Conus or Absent Right Atrioventricular Connection or arrhythmia* or sinus or sinoatrial or atria* or auricular or atrioventricular or ventricular or bradycardia or Bradyarrhythmia* or tachycardia* or fibrillation* or flutter* or Right Bundle Branch Block or Brugada or extrasystole* or (commotion adj1 cordis) or Auriculo-Ventricular Dissociation or Auriculo Ventricular Dissociation or Atrioventricular Dissociation or A-V Dissociation or AV Dissociation or syncope or (Andersen adj2 Tawil) or QT Syndrome or (jervell adj2 lange) or Prolonged QT Interval or (romano adj1 ward) or parasystole or Pre-Excitation or Preexcitation or (Lown adj2 Ganong) or Short PR-Normal QRS Complex Syndrome or Short PR Normal QRS Complex Syndrome or Wolff-Parkinson-White or WPW Syndrome or Idioventricular Rhythm or Torsade de Pointes).ab,hw,kw,ti. | 2756334 |
| 18 | or/15-17                                                                                                                                                                                                                                                                                                                                                                                                                                                                                                                                                                                                                                                                                                                                                                                                                                                                                                                                                                                                                                                                                                                                                                                                                                     | 4713190 |
| 19 | (predict* adj3 risk?).ab,kw,ti.                                                                                                                                                                                                                                                                                                                                                                                                                                                                                                                                                                                                                                                                                                                                                                                                                                                                                                                                                                                                                                                                                                                                                                                                              | 90323   |
| 20 | retrospective.ab,hw,kw,ti.                                                                                                                                                                                                                                                                                                                                                                                                                                                                                                                                                                                                                                                                                                                                                                                                                                                                                                                                                                                                                                                                                                                                                                                                                   | 1280890 |
| 21 | (admission or hospitali?ation or discharge).ab,hw,kw,ti.                                                                                                                                                                                                                                                                                                                                                                                                                                                                                                                                                                                                                                                                                                                                                                                                                                                                                                                                                                                                                                                                                                                                                                                     | 1117031 |
| 22 | and/18-21                                                                                                                                                                                                                                                                                                                                                                                                                                                                                                                                                                                                                                                                                                                                                                                                                                                                                                                                                                                                                                                                                                                                                                                                                                    | 991     |
| 23 | and/9,14,18                                                                                                                                                                                                                                                                                                                                                                                                                                                                                                                                                                                                                                                                                                                                                                                                                                                                                                                                                                                                                                                                                                                                                                                                                                  | 6851    |
| 24 | (ISRCTN96643197 or ChiCTR1900026250 or NCT04008914 or NCT03791541 or NCT03300791 or "CTRI/2016/10/007411" or "CTRI/2014/06/004690" or NCT03949439 or NCT03905226 or NCT00344513 or NCT01755052 or NCT02041585).ab,cn,kw,ti.                                                                                                                                                                                                                                                                                                                                                                                                                                                                                                                                                                                                                                                                                                                                                                                                                                                                                                                                                                                                                  | 31      |
| 25 | ((OPERA or REIC or FIgARO or PREDIC or optimize-hf or ten-hms or tele-hf or readmits or silver-ami or dc promis or KorAHF) adj3 (trial or study)).ab,kw,ti.                                                                                                                                                                                                                                                                                                                                                                                                                                                                                                                                                                                                                                                                                                                                                                                                                                                                                                                                                                                                                                                                                  | 285     |
| 26 | or/22-25                                                                                                                                                                                                                                                                                                                                                                                                                                                                                                                                                                                                                                                                                                                                                                                                                                                                                                                                                                                                                                                                                                                                                                                                                                     | 8017    |

**Supplemental Text 2. Data items**

The following data was collected in accordance with the CHARMS checklist (Critical Appraisal and Data Extraction for Systematic Reviews): citation, source of data, country, study design, setting, participant description, sample characteristics, study dates, outcome definition, follow-up, number and type of predictors, definition and method for measurement of predictors, timing of predictor measurement, handling of predictors in the modelling, number of participants and number of outcomes/events, calibration, discrimination, classification, methods used for testing model performance, final multivariable model results (regression coefficients, intercept, baseline survival, model performance), and model presentation.

Supplemental Table 1A. Risk of Bias

| Study            | Model                                    | Risk of bias |            |         |          | Overall Risk of bias | Applicability |            |         | Overall applicability |
|------------------|------------------------------------------|--------------|------------|---------|----------|----------------------|---------------|------------|---------|-----------------------|
|                  |                                          | Participants | Predictors | Outcome | Analysis |                      | Participants  | Predictors | Outcome |                       |
| Barnett et al.   | Model validation                         | -            | ?          | +       | -        | -                    | +             | +          | +       | +                     |
|                  | Model update                             | -            | ?          | +       | -        | -                    | +             | +          | +       | +                     |
| Sanchez et al.   | NR                                       | -            | ?          | ?       | -        | -                    | +             | +          | +       | +                     |
| Deo et al.       | 30-days CABG Readmission Calculator      | -            | -          | -       | -        | -                    | +             | +          | ?       | ?                     |
| Tan et al.       | NR                                       | -            | -          | -       | -        | -                    | +             | +          | -       | -                     |
| Wang et al.      | NR                                       | -            | ?          | ?       | -        | -                    | +             | +          | +       | +                     |
| Rosenblum et al. | The STS PROM score                       | -            | ?          | -       | -        | -                    | +             | +          | +       | +                     |
| Dodson et al.    | SILVER-AMI 30-day readmission calculator | +            | +          | +       | +        | +                    | +             | +          | +       | +                     |
| Lim et al.       | NR                                       | +            | ?          | -       | -        | -                    | +             | +          | -       | -                     |
| Kini et al.      | NR                                       | -            | -          | -       | ?        | -                    | +             | +          | +       | +                     |
| Nguyen et al.    | AMI READMITS score                       | -            | -          | +       | -        | -                    | +             | +          | +       | +                     |
|                  | Full-stay AMI model                      | -            | -          | +       | -        | -                    | +             | +          | +       | +                     |
|                  | CMS AMI administrative model             | -            | ?          | +       | -        | -                    | +             | +          | +       | +                     |
| Cediel et al.    | TARRACO Risk Score                       | -            | -          | -       | -        | -                    | +             | +          | -       | -                     |
| Brown et al.     | STS 30-day Readmission Model             | +            | ?          | ?       | -        | -                    | +             | +          | ?       | ?                     |
|                  | STS Augmented Clinical Model             | -            | ?          | +       | -        | -                    | +             | +          | ?       | ?                     |
| Khera et al.     | TAVR 30-Day Readmission Risk Model       | -            | -          | ?       | -        | -                    | +             | +          | ?       | ?                     |
| Tam et al.       | NR                                       | -            | -          | ?       | -        | -                    | +             | +          | ?       | ?                     |
| Atzema et al.    | AFTER Part 2 scoring system              | -            | -          | -       | -        | -                    | +             | +          | -       | -                     |
| Stuebe et al.    | NR                                       | -            | +          | -       | -        | -                    | +             | +          | +       | +                     |
| Huynh et al.     | NR                                       | -            | -          | ?       | -        | -                    | +             | +          | +       | +                     |
| Zywot et al.     | CABG Risk Scale                          | -            | ?          | ?       | -        | -                    | +             | +          | +       | +                     |

Supplemental Table 1. Risk of bias (continued)

| Study                    | Model                            | Risk of bias |            |         |          | Overall Risk of bias | Applicability |            |         | Overall applicability |
|--------------------------|----------------------------------|--------------|------------|---------|----------|----------------------|---------------|------------|---------|-----------------------|
|                          |                                  | Participants | Predictors | Outcome | Analysis |                      | Participants  | Predictors | Outcome |                       |
| Cox et al.               | CMS HF medical model             | -            | +          | +       | -        | -                    | +             | +          | +       | +                     |
|                          | CMS HF administrative model      | -            | ?          | +       | -        | -                    | +             | +          | +       | +                     |
| Zitser-Gurevich et al.   | NR                               | ?            | +          | +       | -        | -                    | +             | +          | +       | +                     |
| Ahmad et al.             | CMS HF administrative model      | -            | +          | +       | -        | -                    | +             | +          | +       | +                     |
| Minges et al.            | NR                               | -            | +          | +       | -        | -                    | +             | +          | +       | +                     |
| Pack et al.              | NR                               | -            | -          | -       | -        | -                    | +             | +          | +       | +                     |
| Benuzillo et al.         | CRSS                             | -            | -          | +       | -        | -                    | +             | +          | +       | +                     |
| Kitamura et al.          | FIM                              | -            | ?          | -       | -        | -                    | +             | +          | +       | +                     |
| Lahewala et al.          | CHADS2                           | -            | ?          | +       | -        | -                    | +             | +          | +       | +                     |
|                          | CHA2DS-VASc                      | -            | ?          | +       | -        | -                    | +             | +          | +       | +                     |
| Formiga et al.           | CMS HF medical model             | -            | ?          | -       | -        | -                    | +             | +          | +       | +                     |
| Leong et al.             | 30-day HF readmission risk score | -            | +          | -       | -        | -                    | +             | +          | -       | -                     |
| Burke et al.             | HOSPITAL score                   | -            | -          | -       | -        | -                    | +             | +          | +       | +                     |
| Kilic et al.             | NR                               | -            | ?          | -       | -        | -                    | +             | +          | +       | +                     |
| Moulder et al.           | NR                               | +            | +          | -       | -        | -                    | +             | +          | +       | +                     |
| Chotechuang et al.       | GRACE                            | -            | -          | -       | -        | -                    | +             | +          | -       | -                     |
| Yazdan-Ashoori et al.    | LACE                             | ?            | ?          | +       | -        | -                    | +             | +          | +       | +                     |
|                          | CMS HF administrative model      | ?            | ?          | +       | -        | -                    | +             | +          | +       | +                     |
| Oliver-McNeil et al.     | ICD Readmission-Risk Score       | -            | ?          | -       | -        | -                    | +             | +          | +       | +                     |
| Sudhakar et al.          | CMS HF medical model             | -            | +          | -       | -        | -                    | +             | +          | +       | +                     |
| Raposeiras-Roubín et al. | GRACE                            | -            | -          | -       | -        | -                    | +             | +          | -       | -                     |
| Betihavas et al.         | NR                               | -            | ?          | -       | -        | -                    | +             | +          | -       | -                     |
| Lancey et al.            | NR                               | -            | ?          | -       | -        | -                    | +             | +          | +       | +                     |
| Moretti et al.           | EuroHeart PCI score              | -            | +          | -       | -        | -                    | +             | +          | -       | -                     |
| Hilbert et al.           | HF decision tree                 | -            | +          | +       | -        | -                    | +             | +          | +       | +                     |
|                          | AMI decision tree                | -            | +          | +       | -        | -                    | +             | +          | +       | +                     |

Supplemental Table 1. Risk of bias (continued)

| Study               | Model                                            | Risk of bias |            |         |          | Overall Risk of bias | Applicability |            |         | Overall applicability |
|---------------------|--------------------------------------------------|--------------|------------|---------|----------|----------------------|---------------|------------|---------|-----------------------|
|                     |                                                  | Participants | Predictors | Outcome | Analysis |                      | Participants  | Predictors | Outcome |                       |
| Wang et al.         | LACE                                             | -            | ?          | -       | -        | -                    | +             | +          | +       | +                     |
| Rana et al.         | HOSPITAL score                                   | -            | ?          | -       | -        | -                    | +             | +          | -       | -                     |
|                     | Elixhauser index                                 | -            | ?          | -       | -        | -                    | +             | +          | -       | -                     |
| Hummel et al.       | CMS HF medical model                             | ?            | +          | +       | -        | -                    | +             | +          | +       | +                     |
| Salah et al.        | ELAN-HF score                                    | -            | ?          | -       | -        | -                    | +             | +          | -       | -                     |
| Wasfy et al.        | Pre-PCI model                                    | -            | +          | ?       | -        | -                    | +             | +          | +       | +                     |
| Engoren et al.      | NR                                               | -            | ?          | +       | -        | -                    | +             | +          | +       | +                     |
| Au et al.           | Administrative Claims Model: HF 30-day mortality | -            | ?          | ?       | -        | -                    | +             | +          | ?       | ?                     |
|                     | Charlson Comorbidity Score                       | -            | ?          | ?       | -        | -                    | +             | +          | ?       | ?                     |
|                     | CMS HF administrative model                      | -            | ?          | ?       | -        | -                    | +             | +          | ?       | ?                     |
|                     | LACE                                             | -            | ?          | ?       | -        | -                    | +             | +          | ?       | ?                     |
| Krumholz et al.     | CMS AMI medical model                            | +            | -          | +       | -        | -                    | +             | +          | +       | +                     |
|                     | CMS AMI administrative model                     | -            | -          | +       | -        | -                    | +             | +          | +       | +                     |
| Amarasingham et al. | Tabak mortality score                            | -            | ?          | ?       | -        | -                    | +             | +          | +       | +                     |
|                     | CMS HF administrative model                      | -            | ?          | ?       | -        | -                    | +             | +          | +       | +                     |
|                     | ADHERE                                           | -            | ?          | ?       | -        | -                    | +             | +          | +       | +                     |
| Keenan et al.       | CMS HF administrative model                      | -            | -          | +       | -        | -                    | +             | +          | +       | +                     |
|                     | CMS HF medical model                             | +            | -          | -       | -        | -                    | +             | +          | +       | +                     |
| Ferraris et al.     | READMIT                                          | ?            | +          | +       | -        | -                    | +             | +          | +       | +                     |
| Delgado et al.      | 15-day CV readmission risk score                 | ?            | +          | -       | -        | -                    | +             | +          | -       | -                     |
|                     | 30-day CV readmission risk score                 | ?            | +          | -       | -        | -                    | +             | +          | -       | -                     |
| Espinoza et al.     | 30-day readmission score after cardiac surgery   | +            | ?          | ?       | -        | -                    | +             | +          | +       | +                     |

Supplemental Table 1. Risk of bias (continued)

| Study           | Model                       | Risk of bias |            |         |          | Overall Risk of bias | Applicability |            |         | Overall applicability |
|-----------------|-----------------------------|--------------|------------|---------|----------|----------------------|---------------|------------|---------|-----------------------|
|                 |                             | Participants | Predictors | Outcome | Analysis |                      | Participants  | Predictors | Outcome |                       |
| Reed et al.     | CMS HF administrative model | -            | ?          | ?       | -        | -                    | +             | +          | +       | +                     |
|                 | PARR-30                     | -            | ?          | ?       | -        | -                    | +             | +          | +       | +                     |
|                 | LACE                        | -            | ?          | ?       | -        | -                    | +             | +          | +       | +                     |
|                 | Hasan                       | -            | ?          | ?       | -        | -                    | +             | +          | +       | +                     |
|                 | AH model                    | -            | ?          | ?       | -        | -                    | +             | +          | +       | +                     |
| Ibrahim et al.  | HOSPITAL score              | -            | +          | -       | -        | -                    | +             | +          | +       | +                     |
|                 | LACE                        | -            | +          | -       | -        | -                    | +             | +          | +       | +                     |
|                 | LACE+ index                 | -            | +          | -       | -        | -                    | +             | +          | +       | +                     |
| Bardhan et al.  | NR                          | -            | -          | -       | -        | -                    | +             | +          | -       | -                     |
| Asche et al.    | NR                          | -            | ?          | -       | -        | -                    | +             | +          | ?       | ?                     |
| Li et al.       | NR                          | -            | ?          | +       | -        | -                    | +             | +          | +       | +                     |
| Hammill et al.  | CMS HF administrative model | -            | -          | +       | ?        | -                    | +             | +          | +       | +                     |
| Frizzell et al. | CMS HF administrative model | -            | -          | +       | -        | -                    | +             | +          | +       | +                     |

Legend: the overall risk of bias assessment is located in the main paper.

Abbreviations: AH: Adventist hospitals, CABG: coronary artery bypass grafting, CMS=centers for Medicare and Medicaid services, CRSS: CABG Readmission Risk Score, Fim: motor and cognitive Functional Independence Measure, HF: heart failure, ICD: implantable cardioverter defibrillator, NR: not reported, PARR-30: Patients at Risk of Re-admission within 30-days, PCI: percutaneous coronary intervention, TAVR: transcatheter aortic valve replacement



**Supplemental Figure 1. Meta-analysis of CMS AMI administrative model**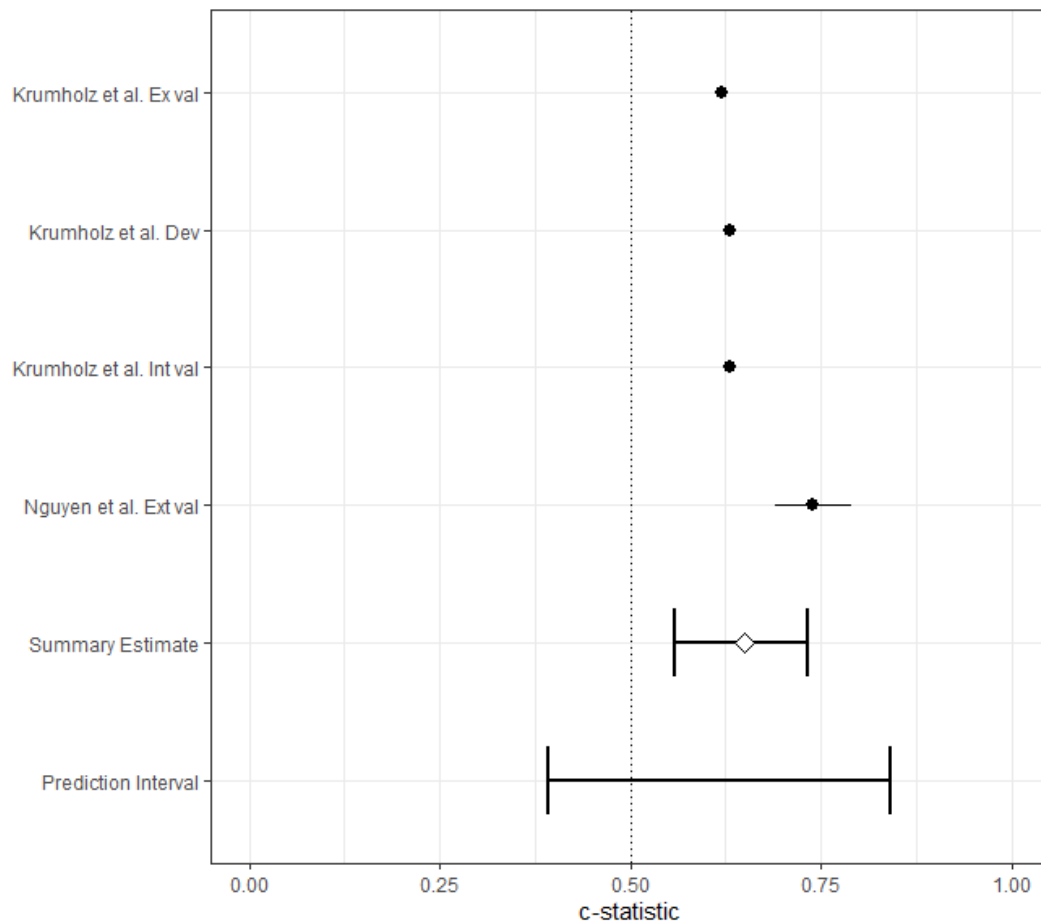

Legend: The CMS acute myocardial infarction (AMI) administrative model was evaluated in four independent cohorts in two studies: 0.65, 95% CI 0.56 to 0.73, 95% prediction interval 0.39 to 0.84. Standard errors were derived from the reported c-statistics, sample size and observed events. The readmission rate was missing for the internal validation cohort in the Krumholz et al. study, and this data was needed to derive the observed events. The development and validation cohort in the Krumholz et al. study were similar samples and we used the average readmission rate from these two cohorts to impute the missing readmission rate for the internal validation.

Abbreviations: Ext val: external validation, Int val: interval validation, Dev: Development

## Supplemental Figure 2. Meta-analysis of CMS HF administrative model

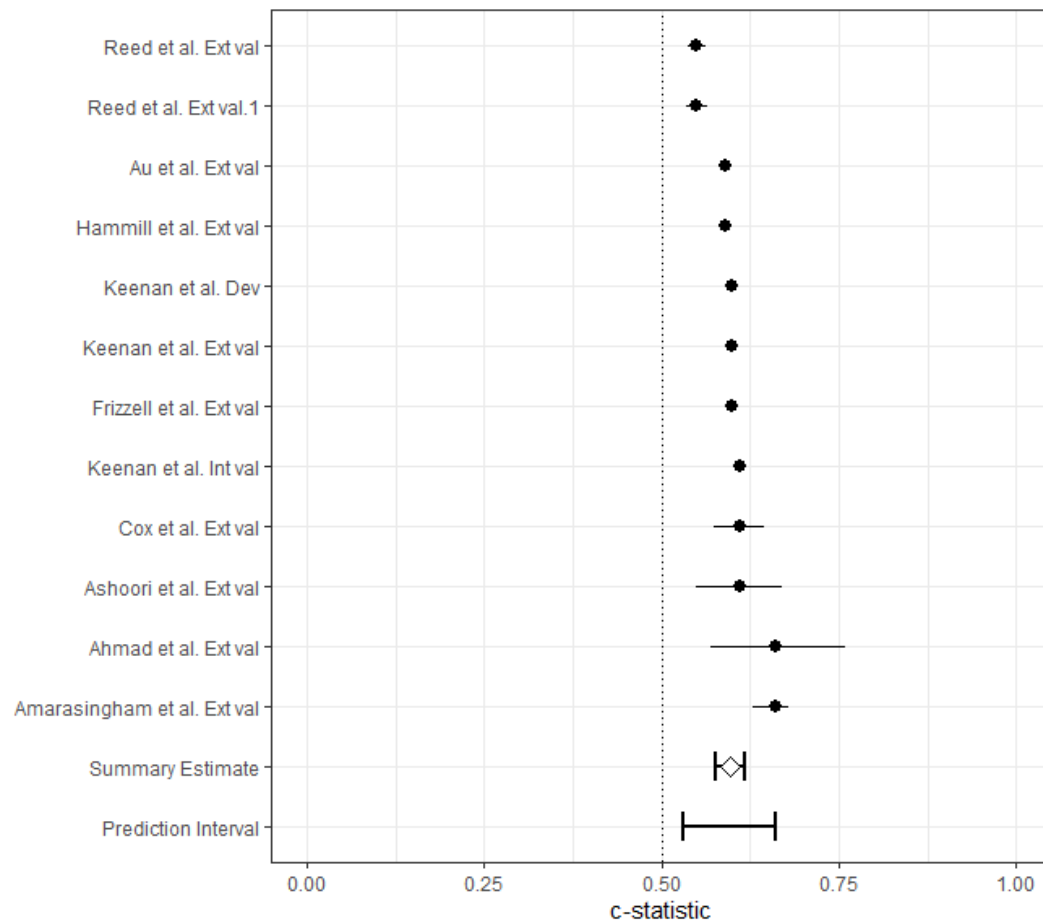

Legend: The CMS heart failure (HF) administrative model was evaluated in twelve independent cohorts in nine studies: 0.60, 95% CI 0.58 to 0.62, 95% prediction interval 0.53 to 0.66. Standard errors were derived from the reported c-statistics, sample size and observed events. The readmission rate was missing for the internal validation cohort in the Keenan et al. study, and this data was needed to derive the observed events. The development and validation cohort in the Keenan et al. study were similar samples and we used the average readmission rate from these two cohorts to impute the missing readmission rate for the internal validation.

Abbreviations: Ext val: external validation, Int val: internal validation, Dev: Development

**Supplemental Figure 3. Meta-analysis of CMS medical model**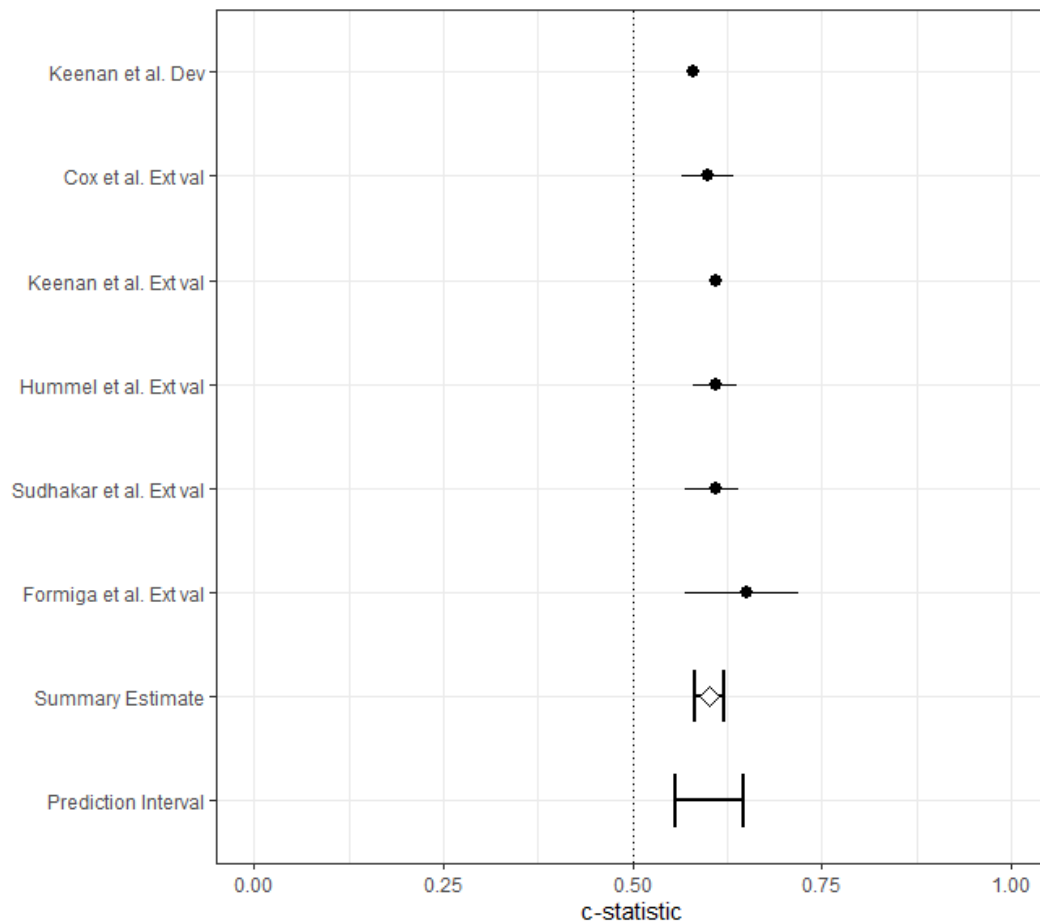

Legend: The CMS medical model was evaluated in six independent cohorts in five studies: 0.60, 95% CI 0.58 to 0.62, 95% prediction interval 0.56 to 0.65. Standard errors were derived from the reported c-statistics, sample size and observed events.

Abbreviations: Ext val: external validation, Int val: interval validation, Dev: Development

**Supplemental Figure 4. Meta-analysis of HOSPITAL score**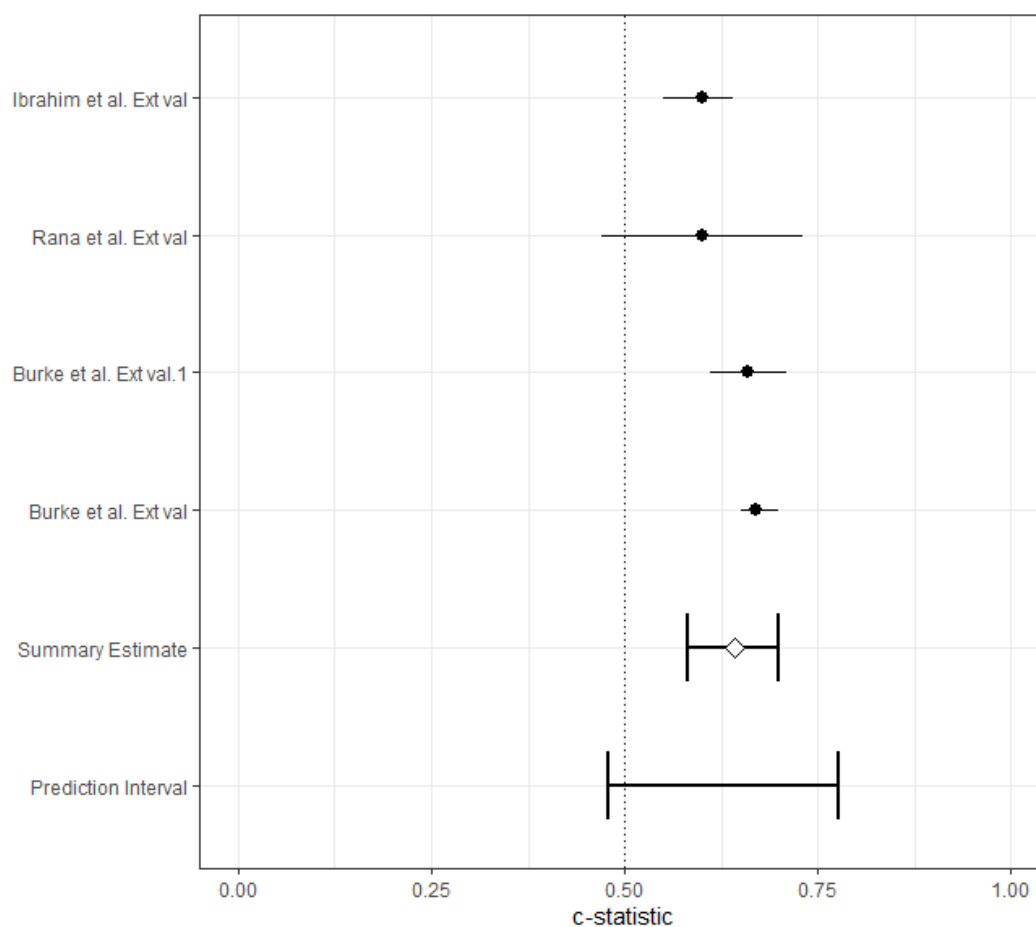

Legend: The HOSPITAL score was evaluated in four independent cohorts in three studies: 0.64, 95% CI 0.58 to 0.70, 95% prediction interval 0.48 to 0.78. Standard errors were derived from the reported c-statistics, sample size and observed events.

Abbreviations: Ext val: external validation, Int val: interval validation, Dev: Development

**Supplemental Figure 5. Meta-analysis of GRACE**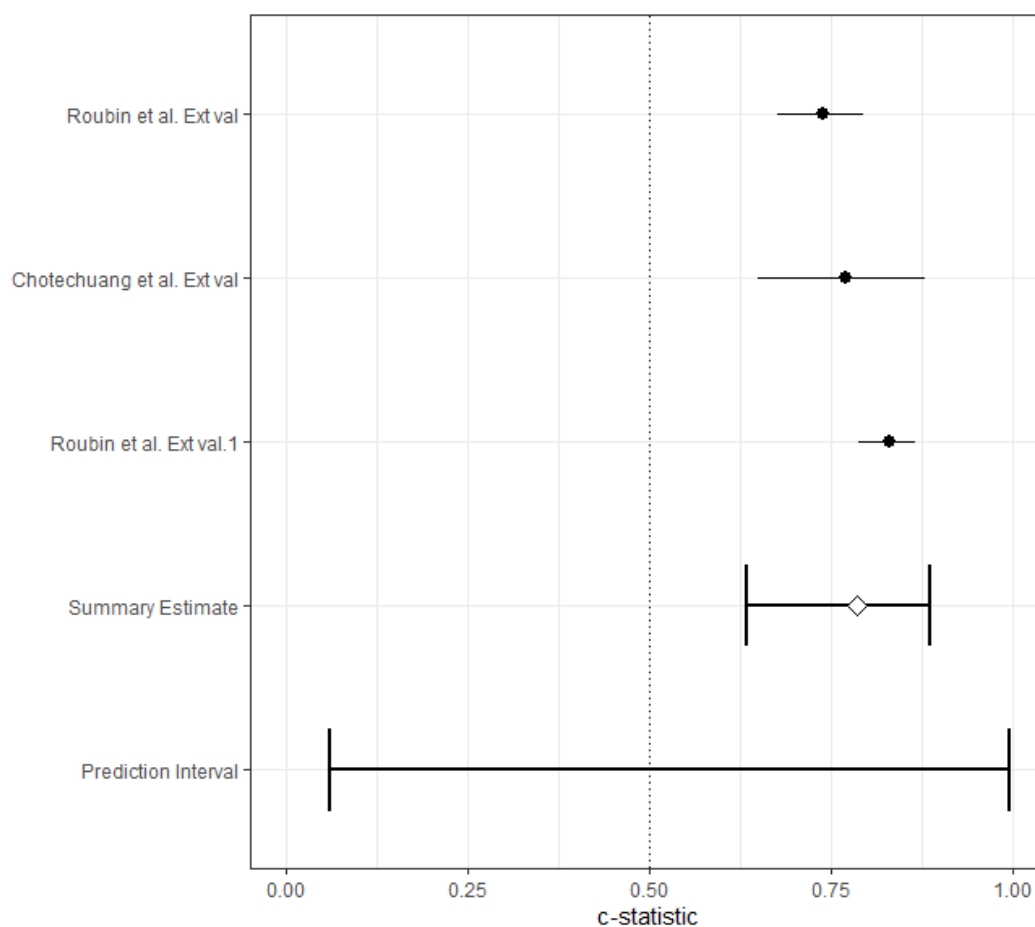

Legend: GRACE was evaluated in four independent cohorts in three studies: 0.79, 95% CI 0.63 to 0.86, 95% prediction interval 0.06 to 1.00. Standard errors were derived from the reported c-statistics, sample size and observed events.

Abbreviations: Ext val: external validation, Int val: interval validation, Dev: Development

**Supplemental Figure 6. Meta-analysis of LACE**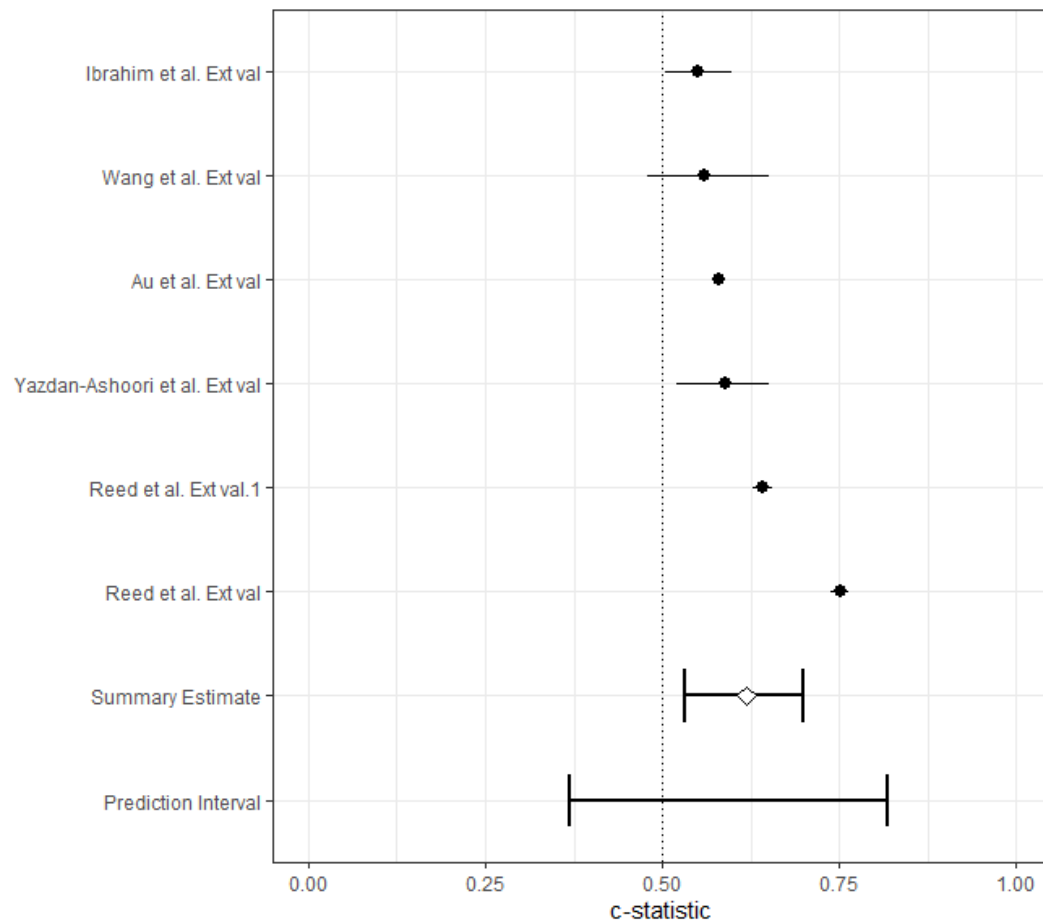

Legend: LACE was evaluated in six independent cohorts in five studies: 0.62, 95% CI 0.53 to 0.70, 95% prediction interval 0.37 to 0.82. Standard errors were derived from the reported c-statistics, sample size and observed events.

Abbreviations: Ext val: external validation, Int val: interval validation, Dev: Development

**Supplemental Figure 7. Age as moderator**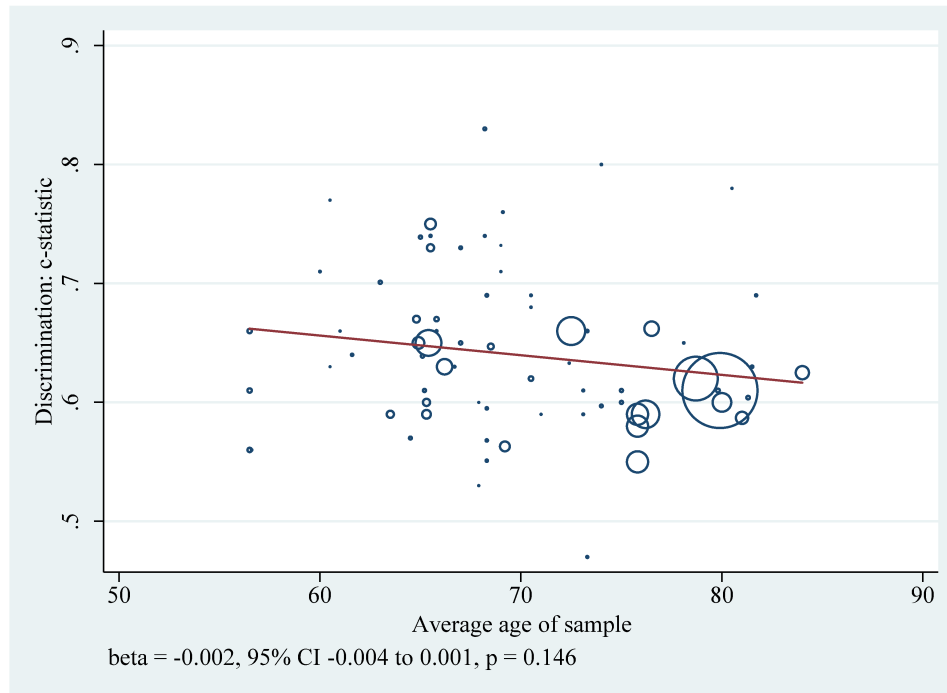

Legend: A meta-regression with average sample age as covariate was performed. The outcome was the discrimination (c-statistic). There is no association between the sample age and the discrimination.

**Supplemental Figure 8. Number of predictors as moderator**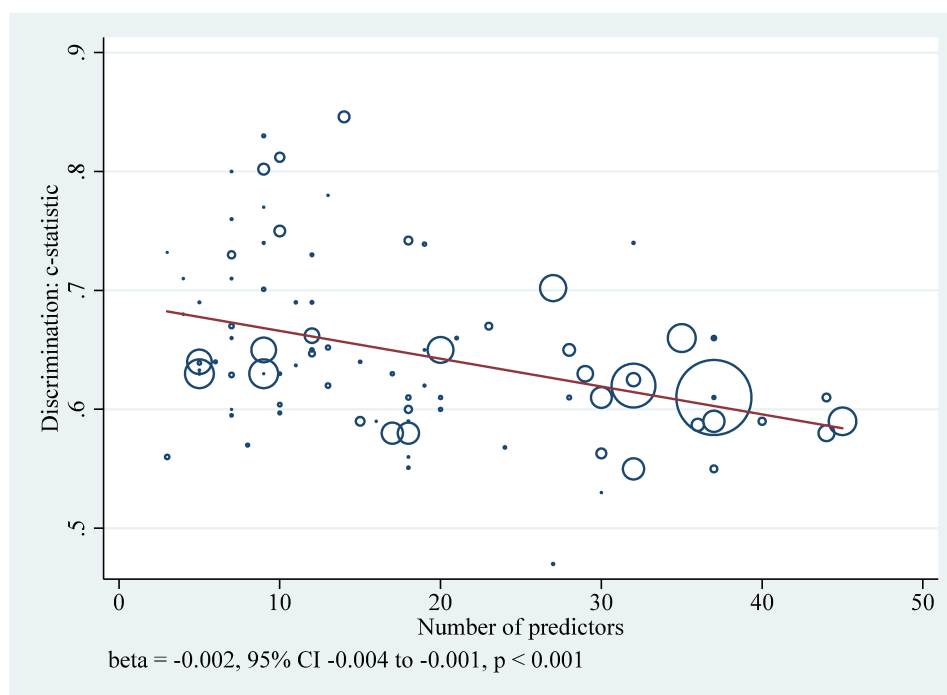

Legend: A meta-regression with the number of predictors as covariate was performed. The outcome was the discrimination (c-statistic). The discrimination increases with the number of predictors decreases. This association is significant.



Supplemental Table 1B. Subgroup analyses

| Moderators                    | N  | C-statistic | 95% CI        | Test for subgroup difference |
|-------------------------------|----|-------------|---------------|------------------------------|
| <b>Population</b>             |    |             |               | p = 0.835                    |
| - Surgical                    | 17 | 0.627       | 0.605 – 0.649 |                              |
| - TAVR                        | 2  | 0.645       | 0.560 – 0.729 |                              |
| - Heart failure               | 45 | 0.641       | 0.623 – 0.658 |                              |
| - Acute myocardial infarction | 16 | 0.671       | 0.644 – 0.697 |                              |
| - Arrhythmias                 | 5  | 0.640       | 0.630 – 0.649 |                              |
| - Valve disease               | 1  | 0.650       | 0.641 – 0.659 |                              |
| - ICD implantation            | 1  | 0.710       | 0.605 – 0.815 |                              |
| - Reinfarction                | 1  | 0.740       | 0.681 – 0.799 |                              |
| - Acute coronary syndrome     | 1  | 0.590       | 0.475 – 0.705 |                              |
| - Mixed                       | 3  | 0.660       | 0.656 – 0.664 |                              |
| <b>Data source</b>            |    |             |               | p = 0.014                    |
| - Registry                    | 17 | 0.613       | 0.602 – 0.624 |                              |
| - Administrative database     | 17 | 0.664       | 0.635 – 0.693 |                              |
| - Hospital database           | 18 | 0.612       | 0.593 – 0.632 |                              |
| - Prospective cohort          | 16 | 0.640       | 0.613 – 0.667 |                              |
| - Retrospective cohort        | 23 | 0.682       | 0.653 – 0.710 |                              |
| - Secondary analysis          | 2  | 0.695       | 0.497 – 0.894 |                              |
| <b>Endpoint</b>               |    |             |               | p = 0.589                    |
| - 15 days                     | 1  | 0.633       | 0.539 – 0.727 |                              |
| - 28 days                     | 1  | 0.800       | 0.720 – 0.880 |                              |
| - 30 days                     | 78 | 0.642       | 0.631 – 0.654 |                              |
| - 90 days                     | 8  | 0.645       | 0.632 – 0.657 |                              |
| - 100 days                    | 1  | 0.652       | 0.626 – 0.678 |                              |
| - 180 days                    | 4  | 0.656       | 0.591 – 0.721 |                              |
| <b>Outcome definition</b>     |    |             |               | p = 0.144                    |
| - All cause                   | 65 | 0.644       | 0.633 – 0.656 |                              |
| - Cardiac related             | 18 | 0.676       | 0.628 – 0.723 |                              |

Legend: Subgroup analyses were performed. The outcome was the discrimination (c-statistic). The discrimination is moderator by the data source that was used in the study, but not by the population, outcome definition and endpoint.

**Supplemental Table 2A. Summary of meta-analyses predictors**

| <b>Predictor</b>                         | <b>Coefficient, 95% CI</b> | <b>Prediction interval</b> |
|------------------------------------------|----------------------------|----------------------------|
| Age (years)                              | 0.01, 0.00 - 0.01          | -0.01 - 0.03               |
| Female                                   | 0.10, 0.03 - 0.17          | -0.17 - 0.38               |
| Arrhythmias                              | 0.20, 0.12 - 0.28          | -0.04 - 0.43               |
| Chronic lung disease                     | 0.23, 0.05 - 0.40          | -0.35 - 0.80               |
| Chronic obstructive pulmonary disease    | 0.18, 0.15 - 0.22          | 0.08 - 0.29                |
| Artherosclerosis                         | 0.01, -0.13 - 0.15         | -0.38 - 0.41               |
| Diabetes mellitus                        | 0.16, 0.11 - 0.22          | -0.04 - 0.37               |
| Current heart failure                    | 0.27, 0.20 - 0.34          | 0.04 - 0.50                |
| Hypertension                             | 0.05, -0.02 - 0.12         | -0.16 - 0.25               |
| Valve disease                            | 0.10, 0.06 - 0.13          | 0.01 - 0.19                |
| Prior percutaneous coronary intervention | 0.01, -0.07 - 0.09         | -0.27 - 0.29               |
| History of heart failure                 | 0.38, 0.25 - 0.51          | 0.01 - 0.75                |
| Cerebrovascular disease                  | 0.08, 0.03 - 0.13          | -0.05 - 0.22               |
| Anemia                                   | 0.10, 0.06 - 0.14          | -0.01 - 0.22               |
| Stroke                                   | 0.07, 0.01 - 0.13          | -0.11 - 0.25               |
| Peripheral vascular disease              | 0.15, 0.09 - 0.21          | -0.03 - 0.34               |
| Dementia                                 | -0.04, -0.10 - 0.02        | -0.21 - 0.12               |
| Prior Coronary Artery Bypass Graft       | 0.04, -0.06 - 0.14         | -0.30 - 0.39               |

Legend: A meta-analyses was performed with the outcome 30 day unplanned hospital readmissions. The forest plots are detailed below. Please note that there are some small differences with the data reported in Figure 4 in the main manuscript. This is because of a difference in rounding the decimal points by the software.

## Supplemental Figure 9. Age as predictor

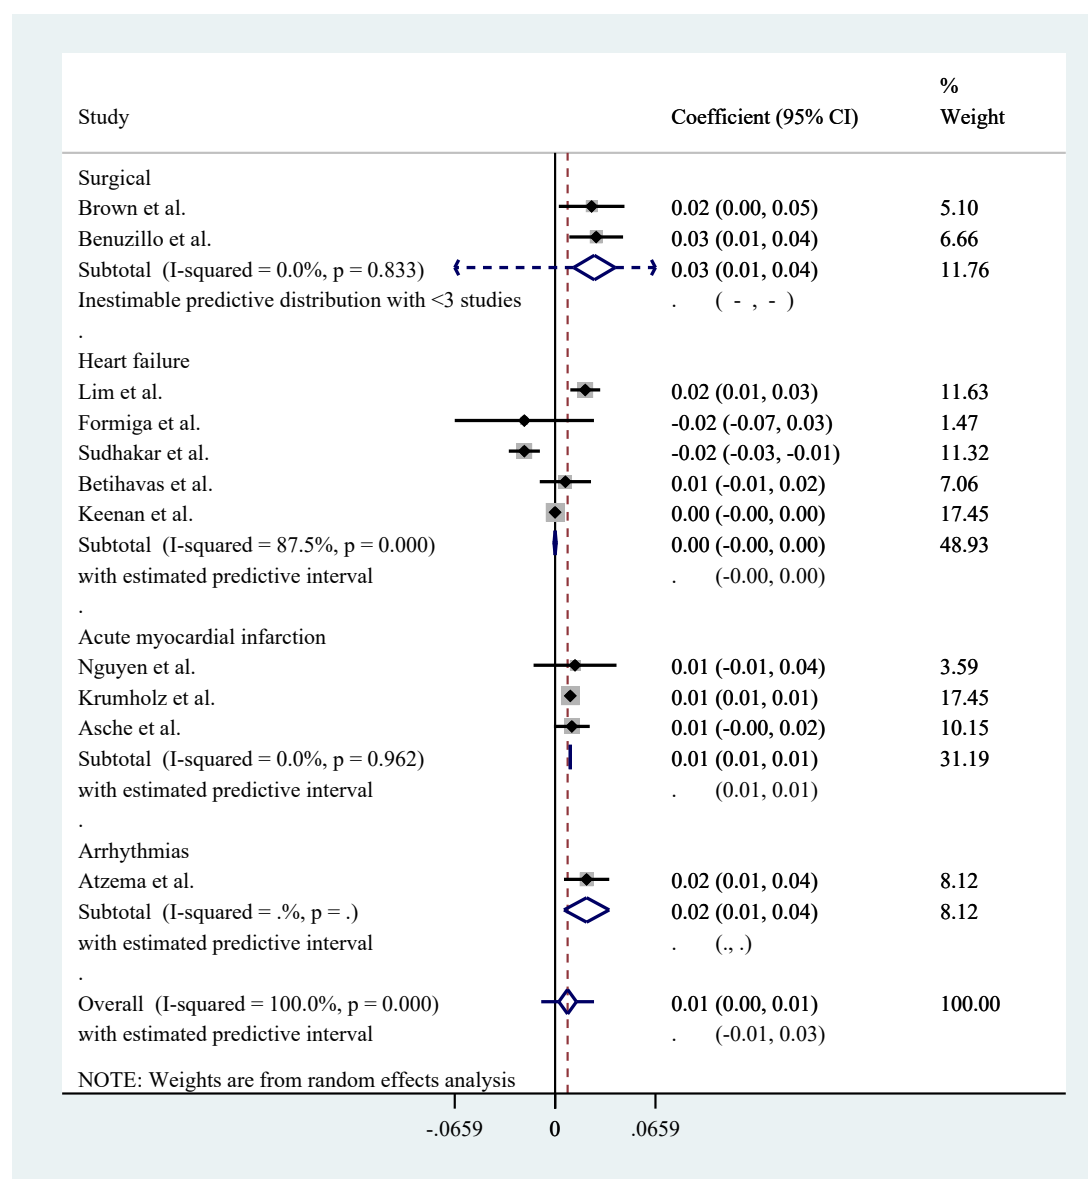

Legend: Two studies were not included in the analysis. One study had a missing standard error and one study reported transformed values. The values of their coefficients were: -0.001, and  $\log(0,502)$ .

**Supplemental Figure 10. Female as predictor**

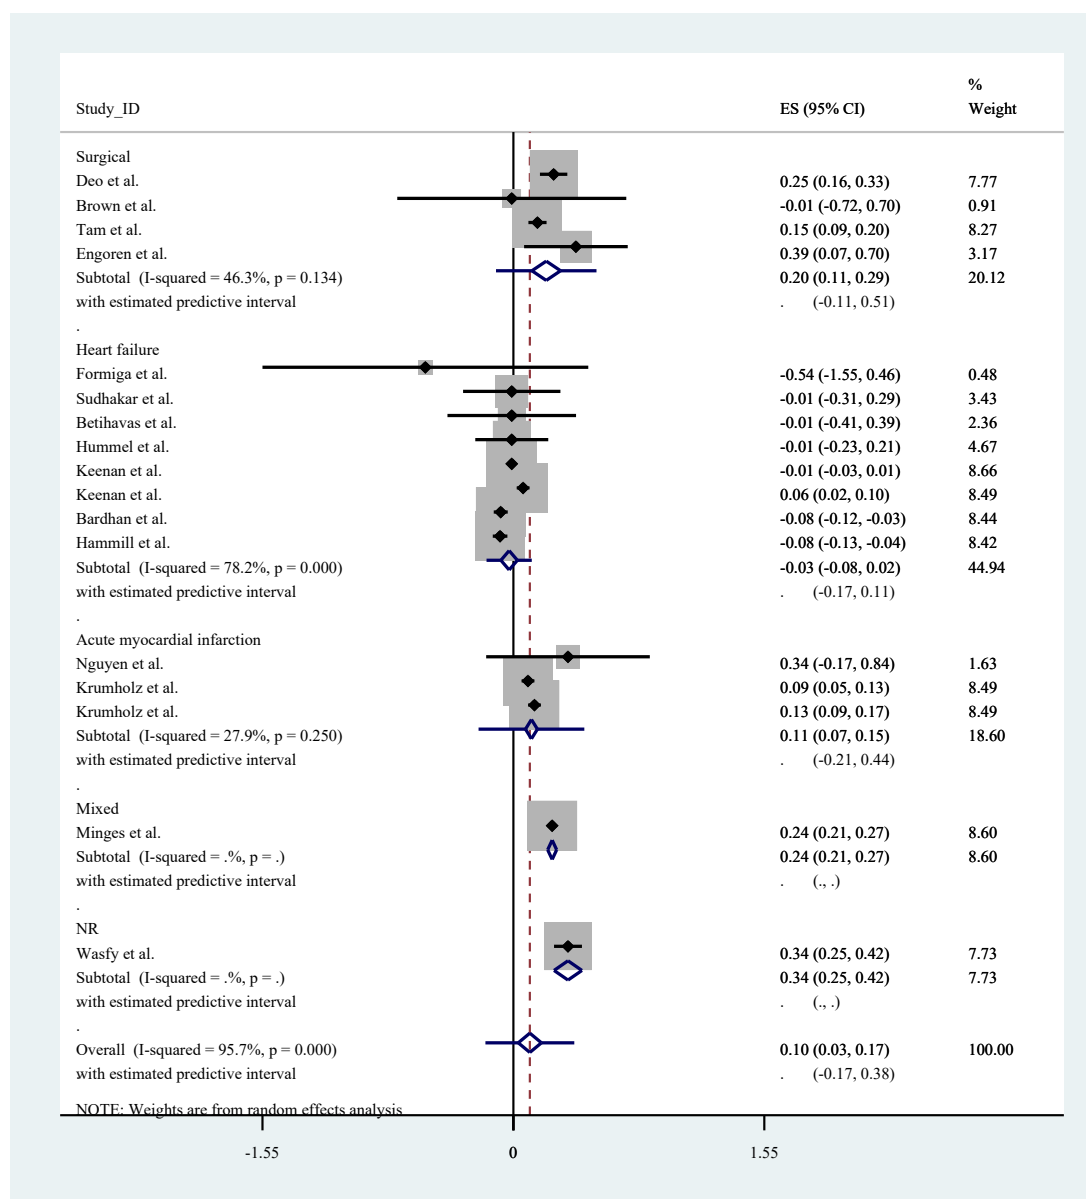

Legend: Two studies were not included in the analysis because the standard errors were missing. The values of their coefficients were: -0.28 and 0.206.

## Supplemental Figure 1. Arrhythmias as predictor

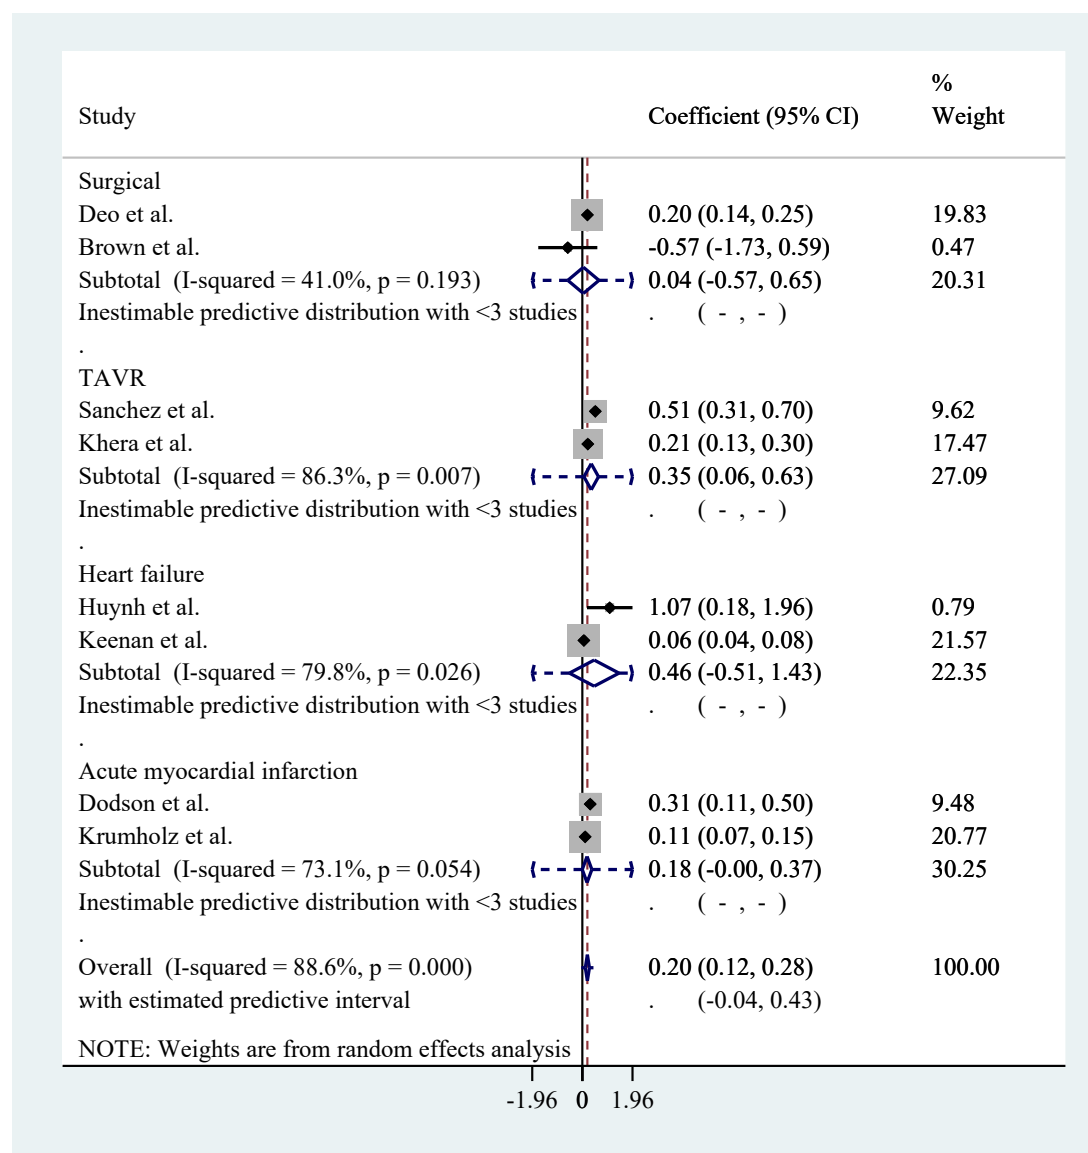

Legend: There was no missing data in the analysis.

## Supplemental Figure 12. Chronic lung disease as predictor

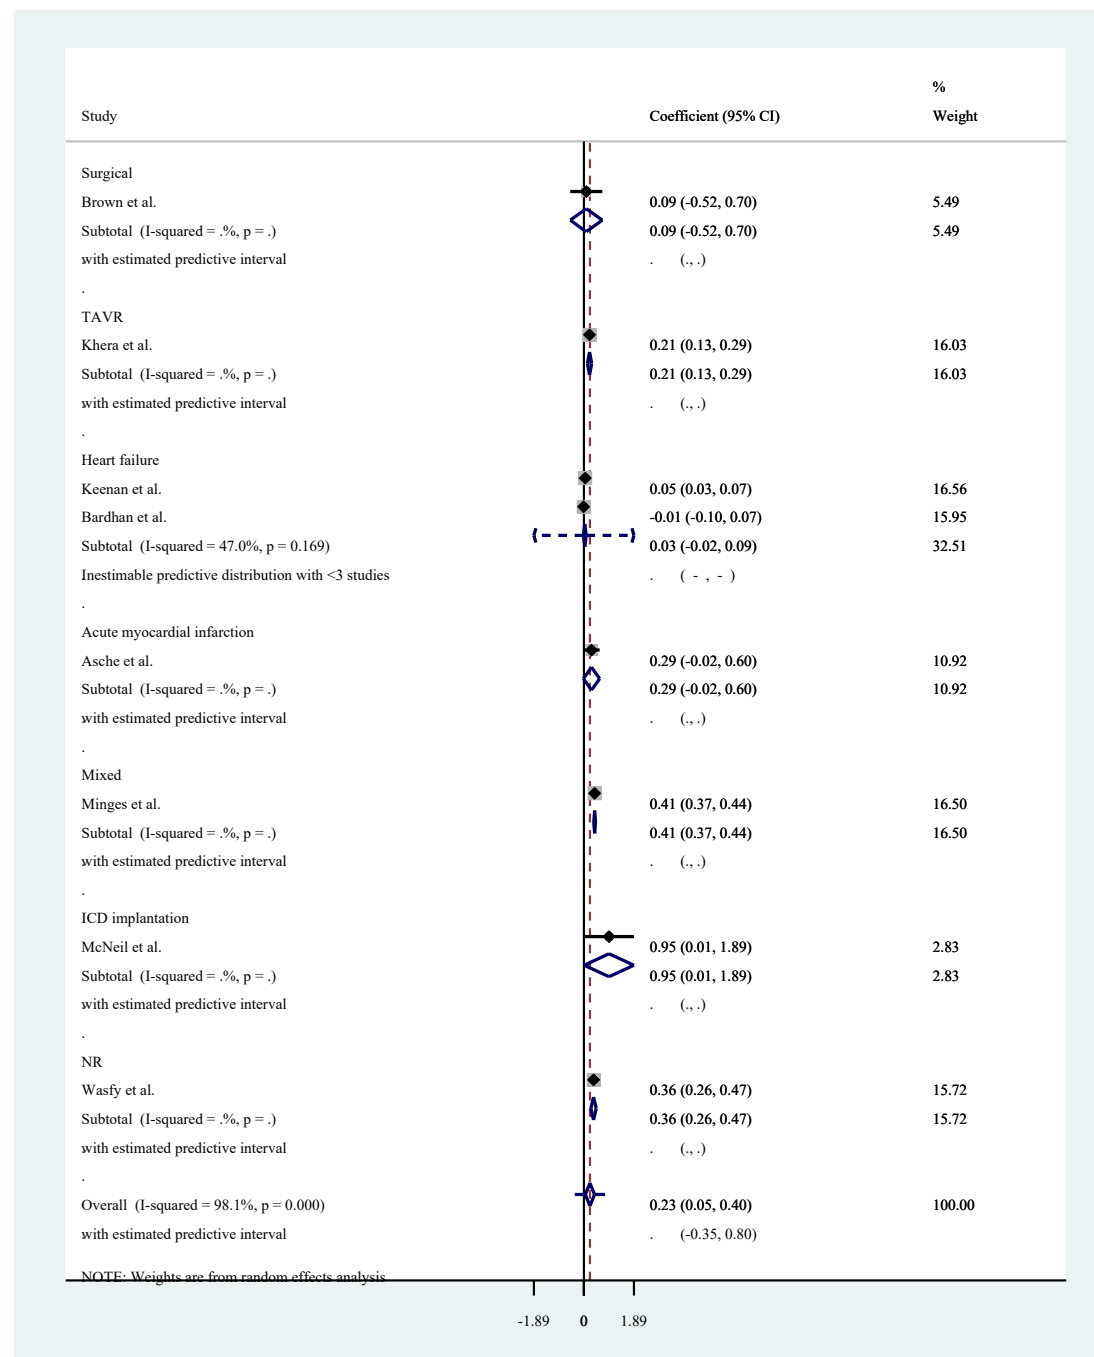

Legend: There was no missing data in the analysis.

## Supplemental Figure 13. Chronic Obstructive Pulmonary Disease as predictor

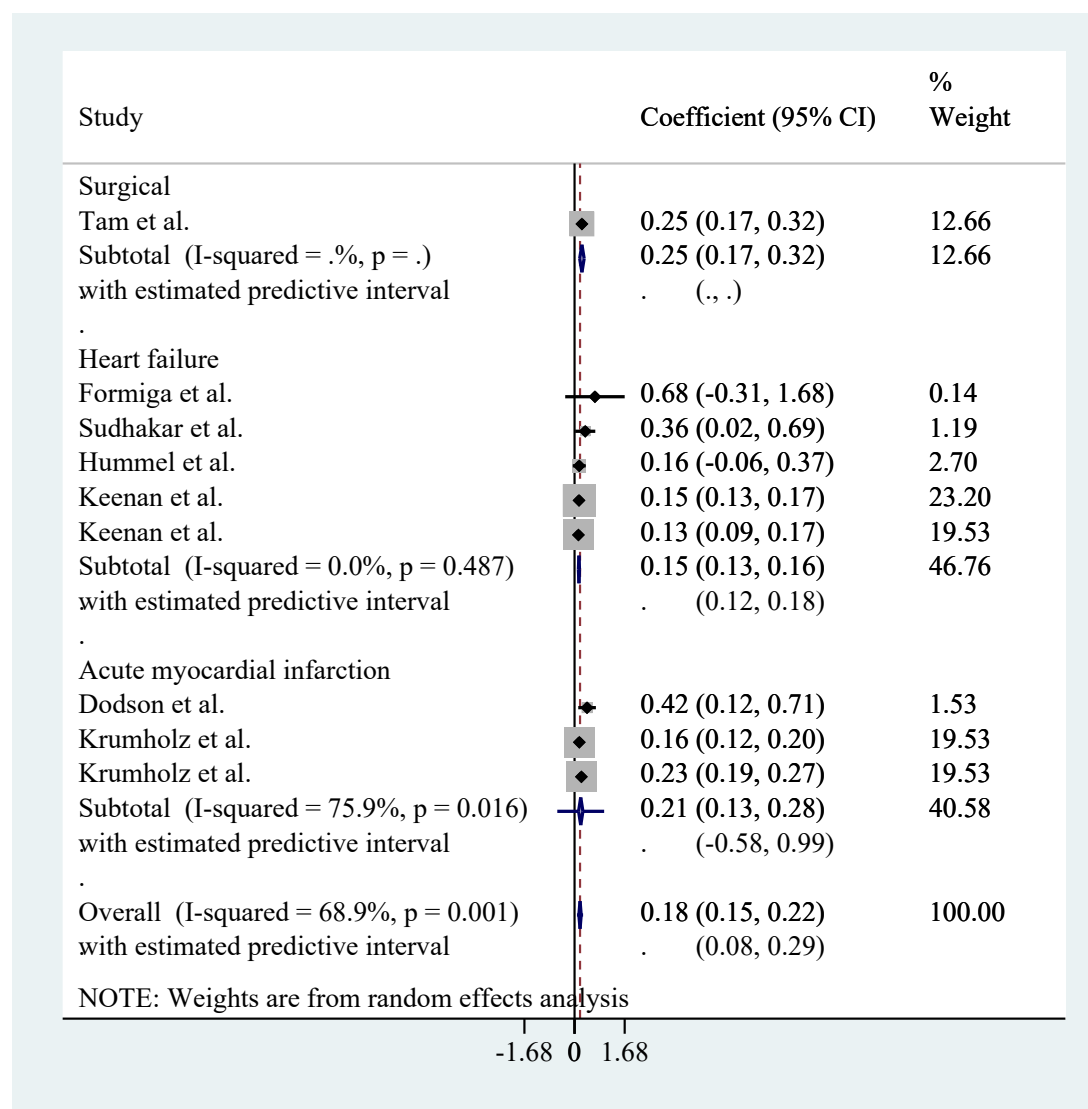

Legend: Two studies were not included in the analysis because the standard errors were missing. The values of their coefficients were: 0.053 and 0.677.

## Supplemental Figure 14. Atherosclerosis as predictor

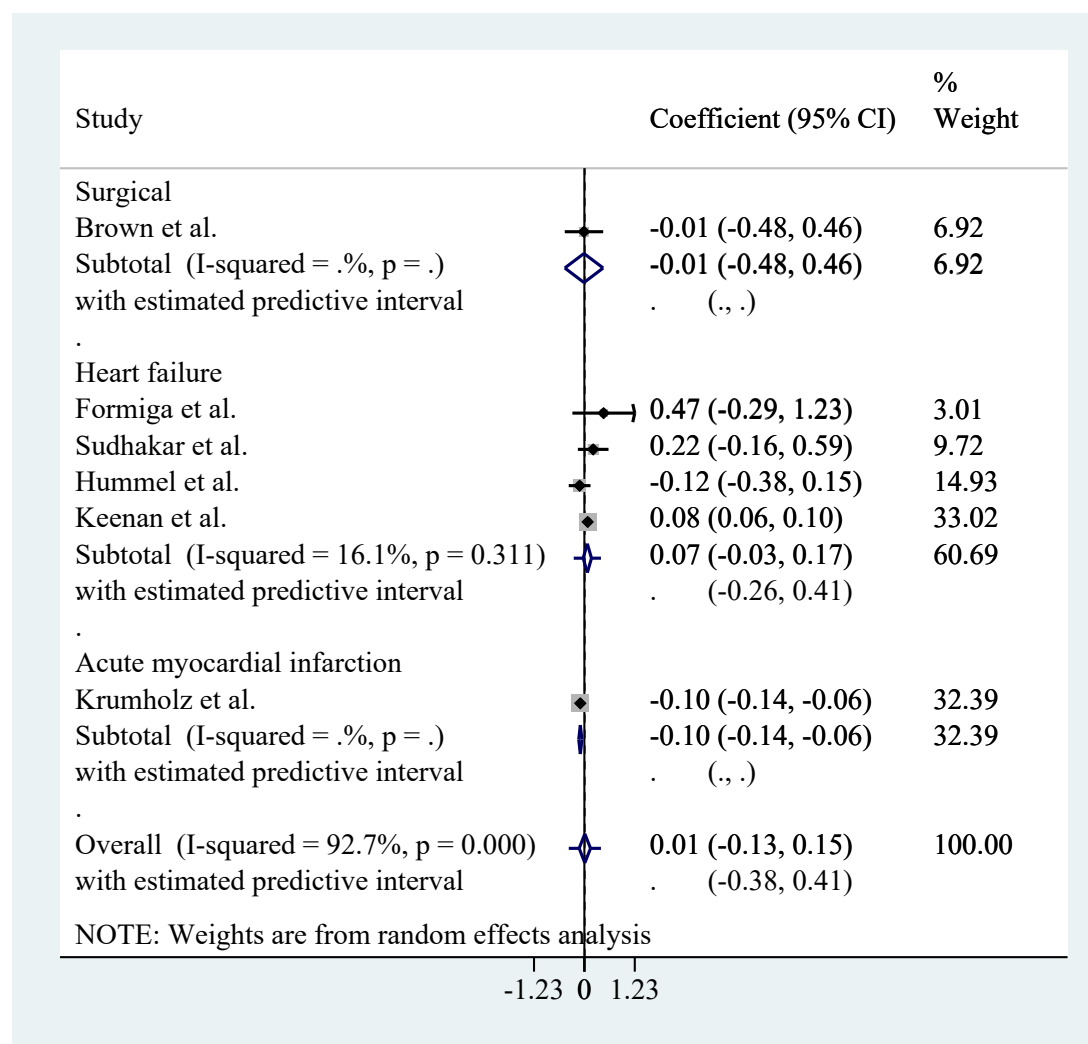

Legend: One study was not included in the analysis because the standard error were missing. The values of their coefficient was: 0.11.



## Supplemental Figure 15. Diabetes Mellitus as predictor

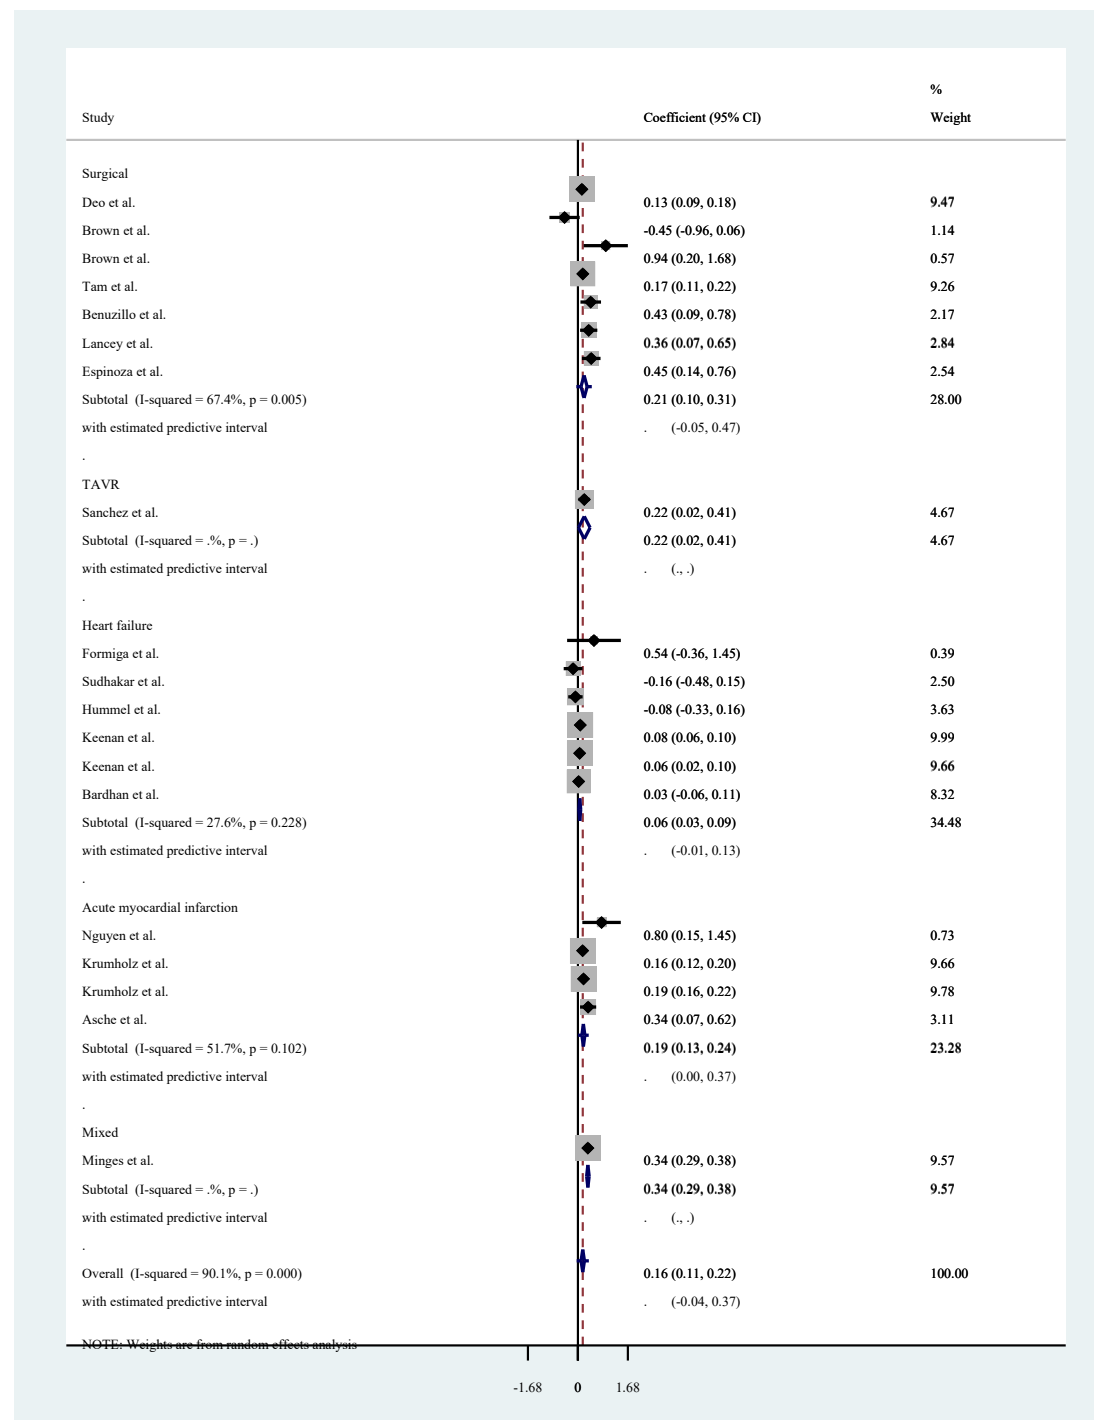

Legend: Two studies were not included in the analysis because the standard errors were missing. The values of their coefficients were: -0.068 and 0.639.

**Supplemental Figure 16. Current heart failure as predictor**

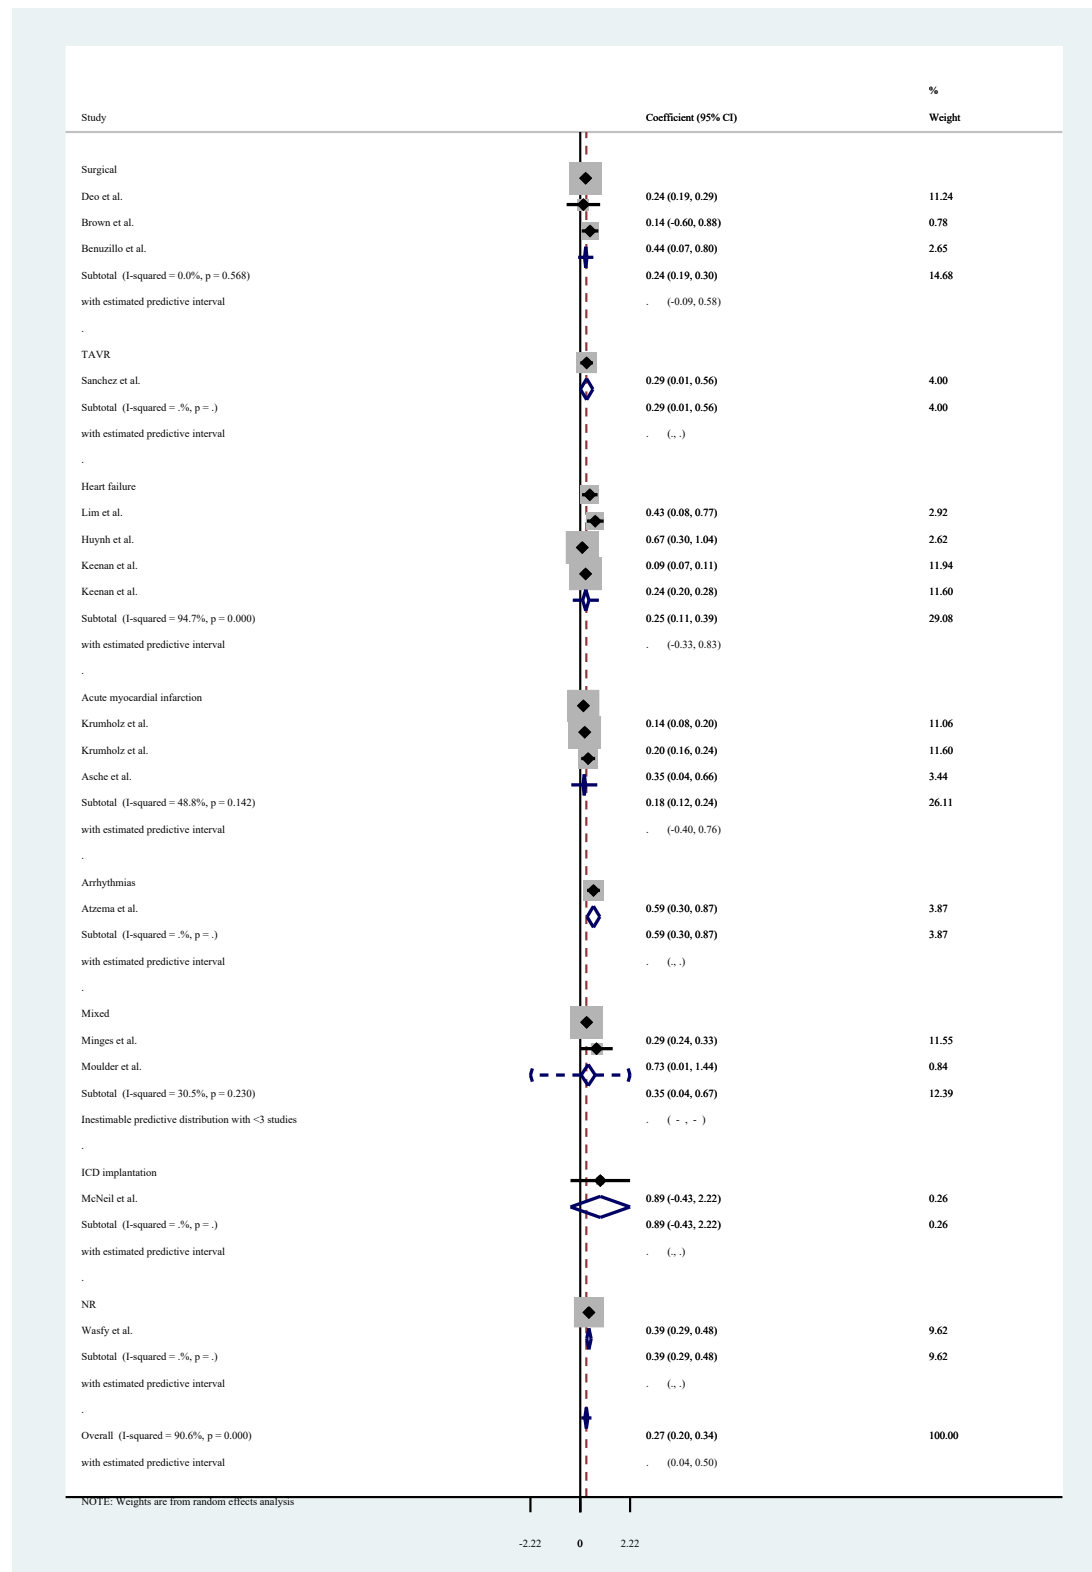

Legend: There was no missing data.

## Supplemental Figure 17. Hypertension as predictor

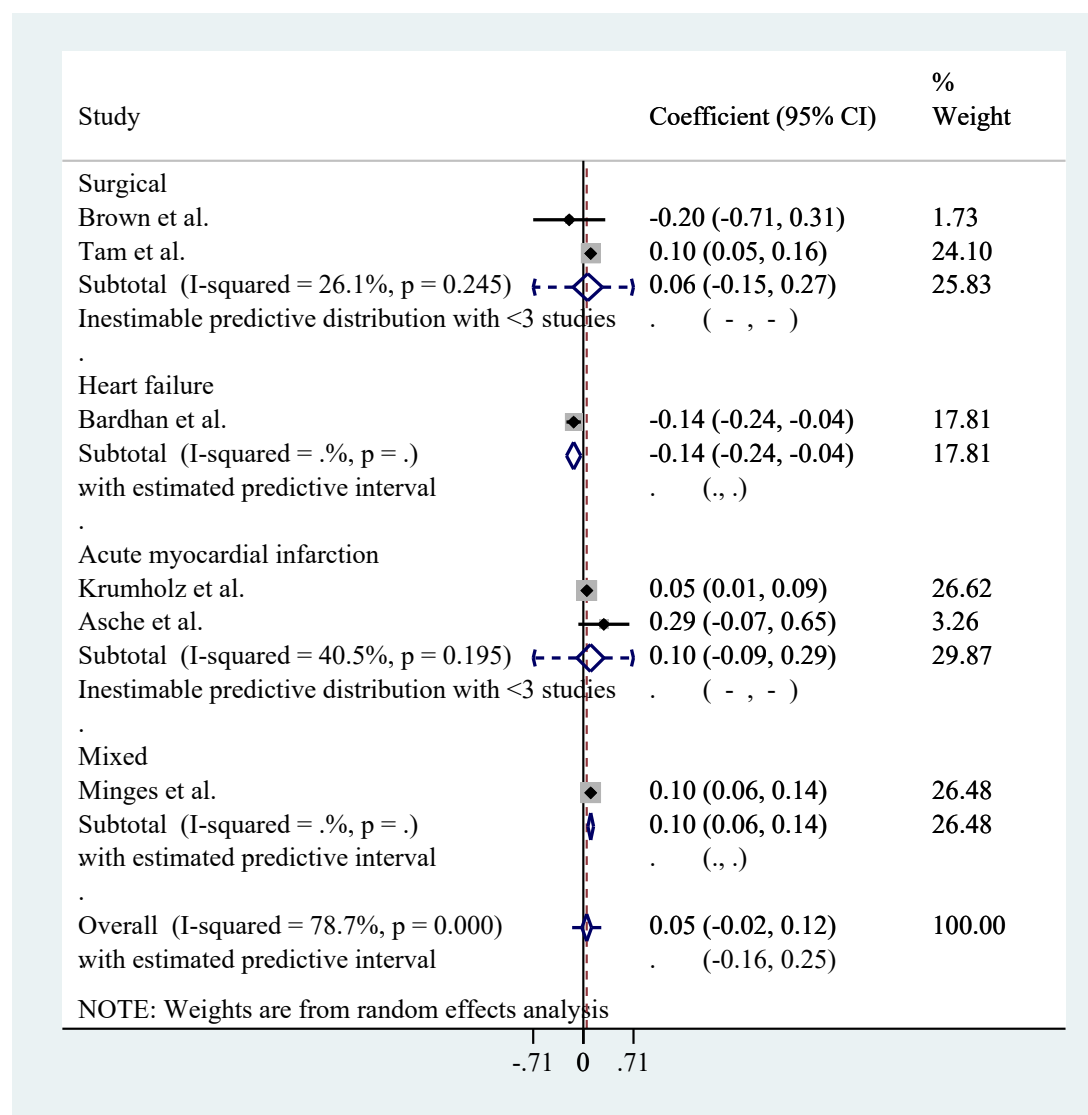

Legend: One study was not included in the analysis because the standard error were missing. The values of their coefficient was: -0.28.

## Supplemental Figure 18. Valve disease as predictor

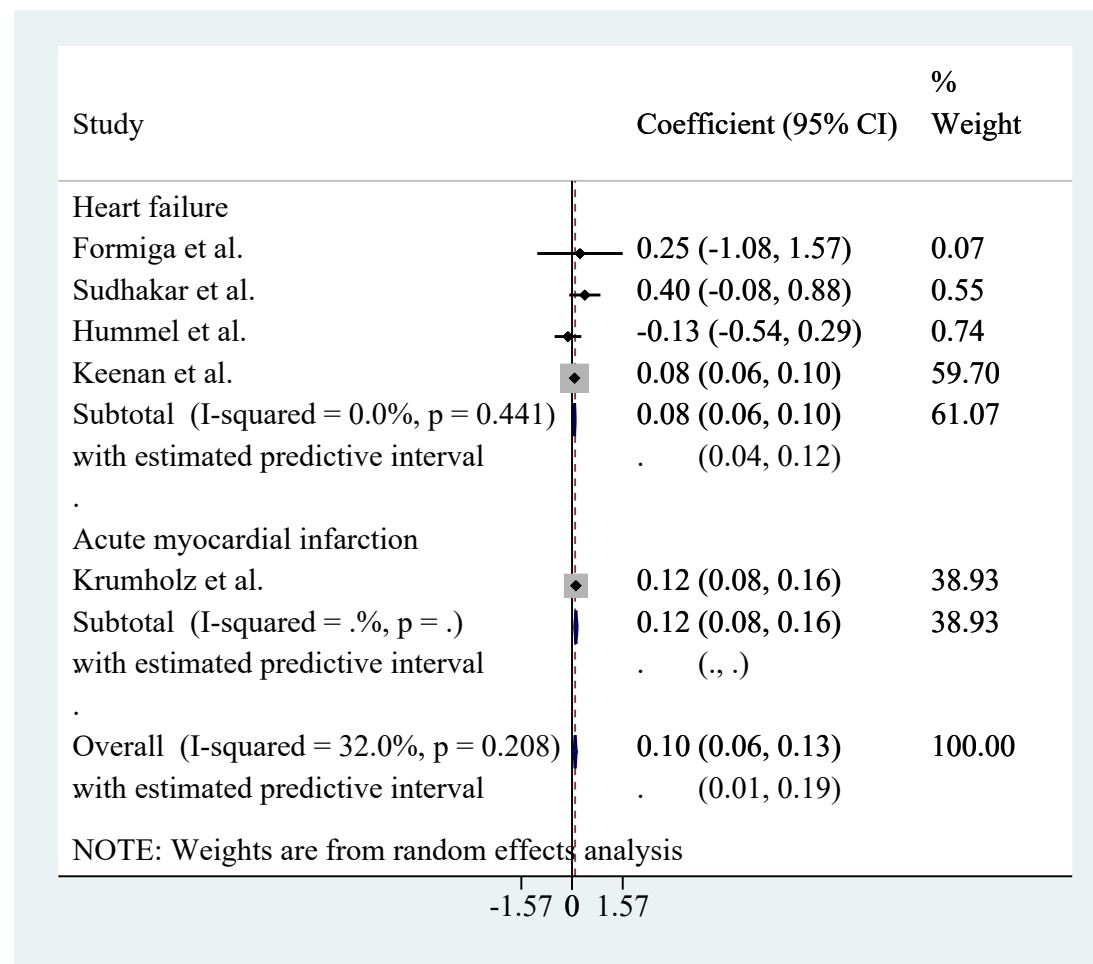

Legend: There was no missing data.

## Supplemental Figure 19. Prior percutaneous coronary intervention as predictor

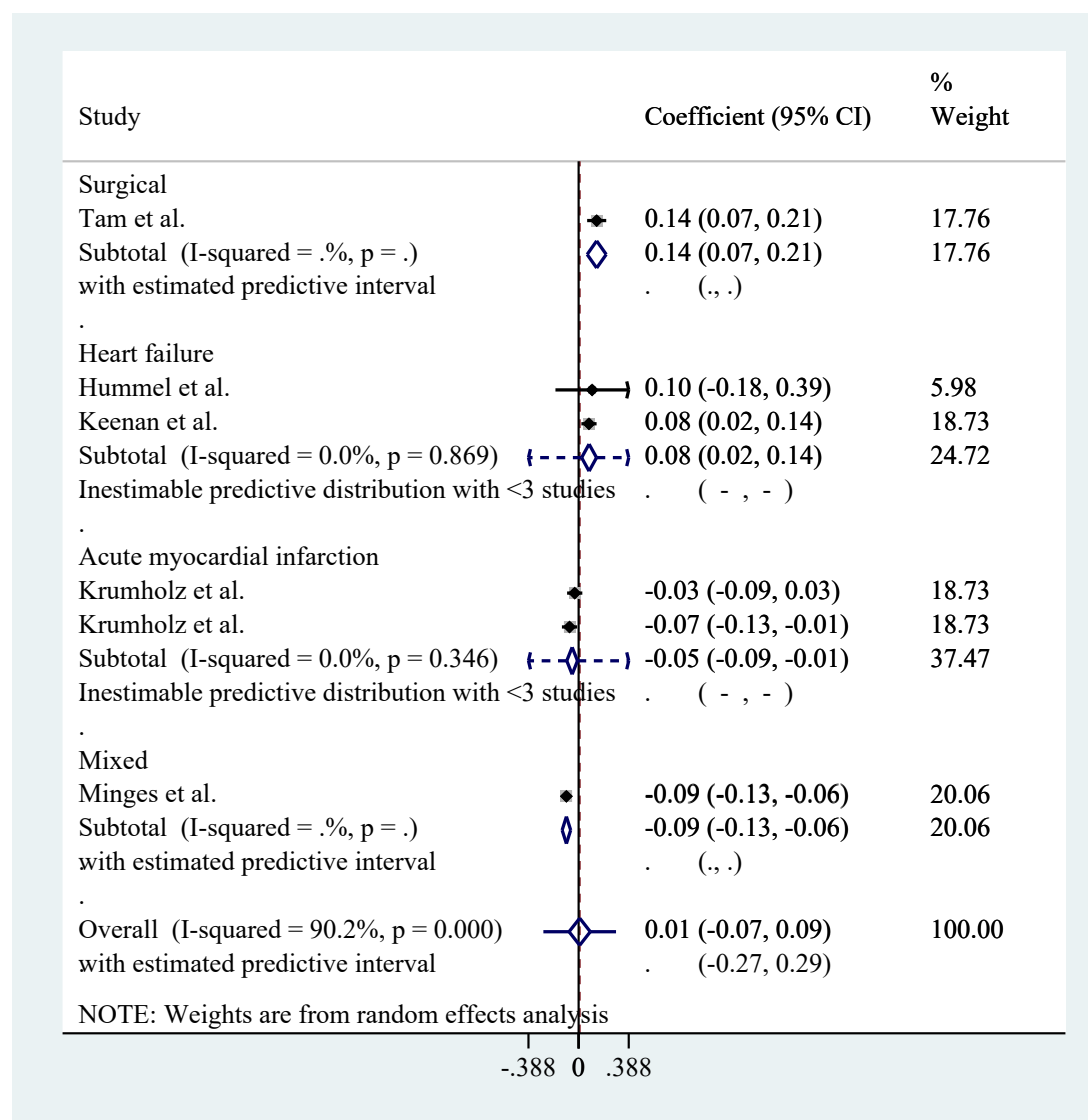

Legend: There was no missing data.

Supplemental Figure 20. History of heart failure as predictor

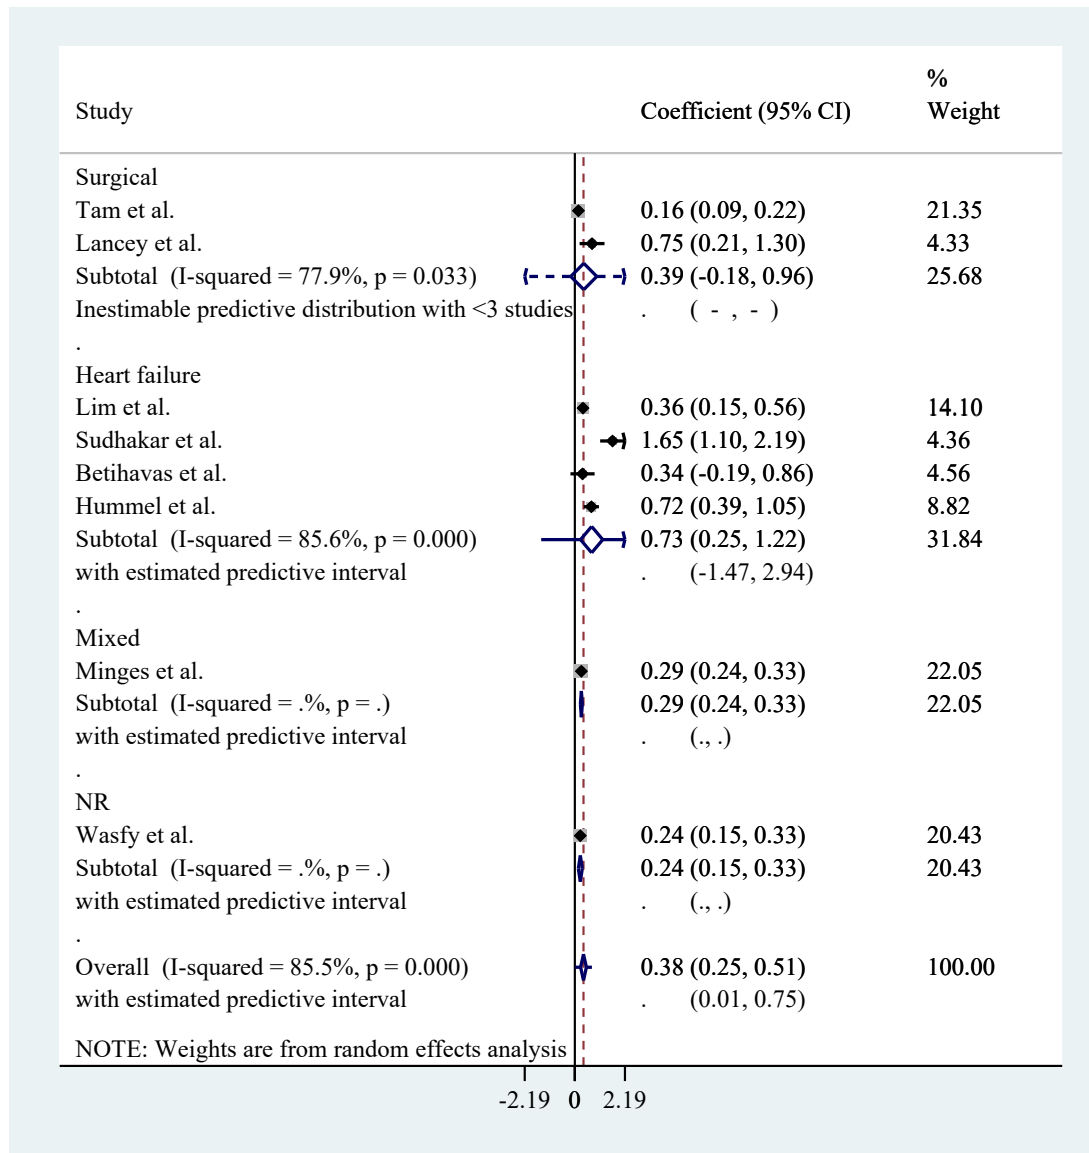

Legend: There was no missing data.

Supplemental Figure 21. Cerebrovascular disease as predictor

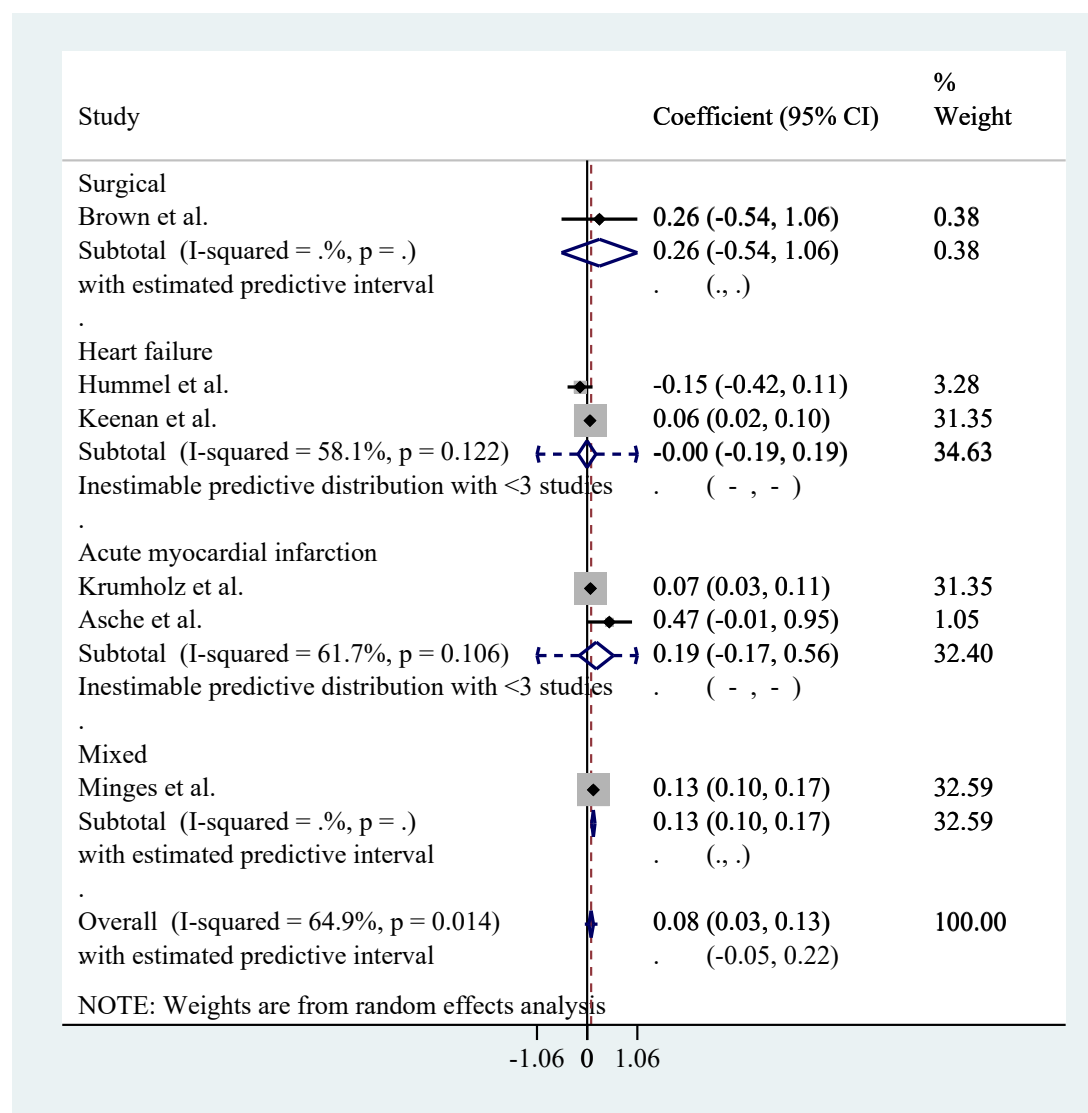

Legend: there was no missing data.

## Supplemental Figure 22. Anemia as predictor

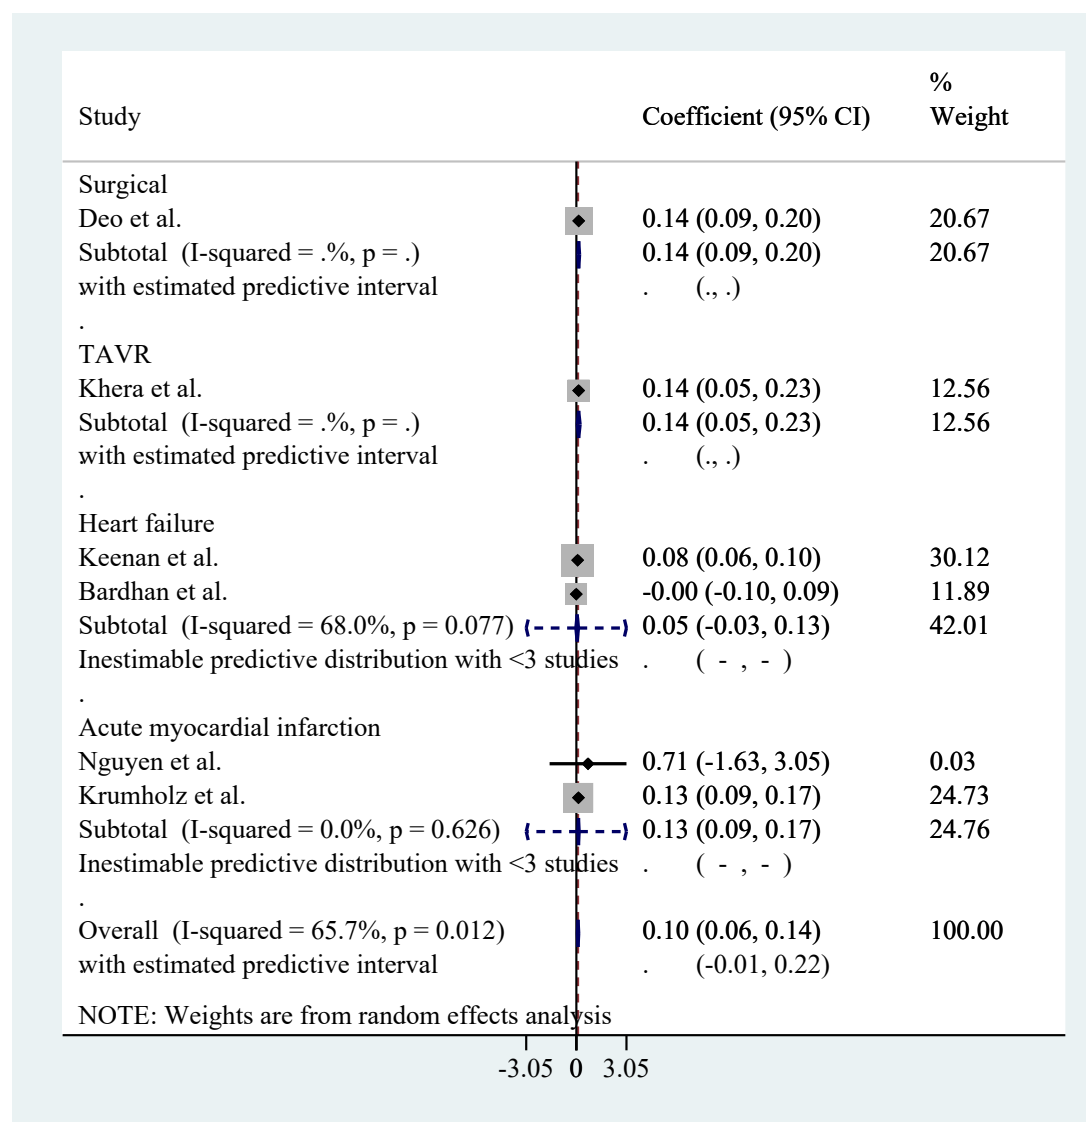

Legend: There was no missing data.



## Supplemental Figure 23. Stroke as predictor

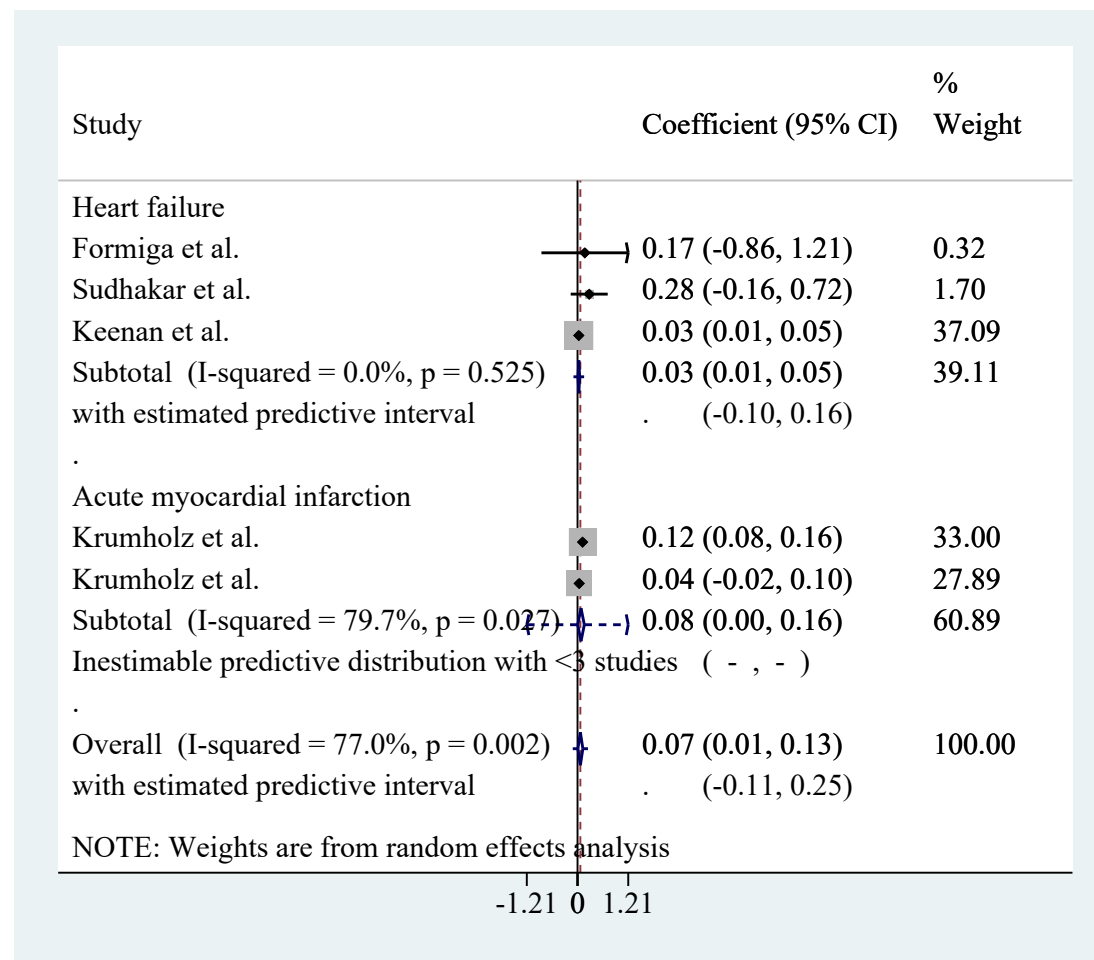

Legend: There was no missing data.

## Supplemental Figure 24. Peripheral vascular disease as predictor

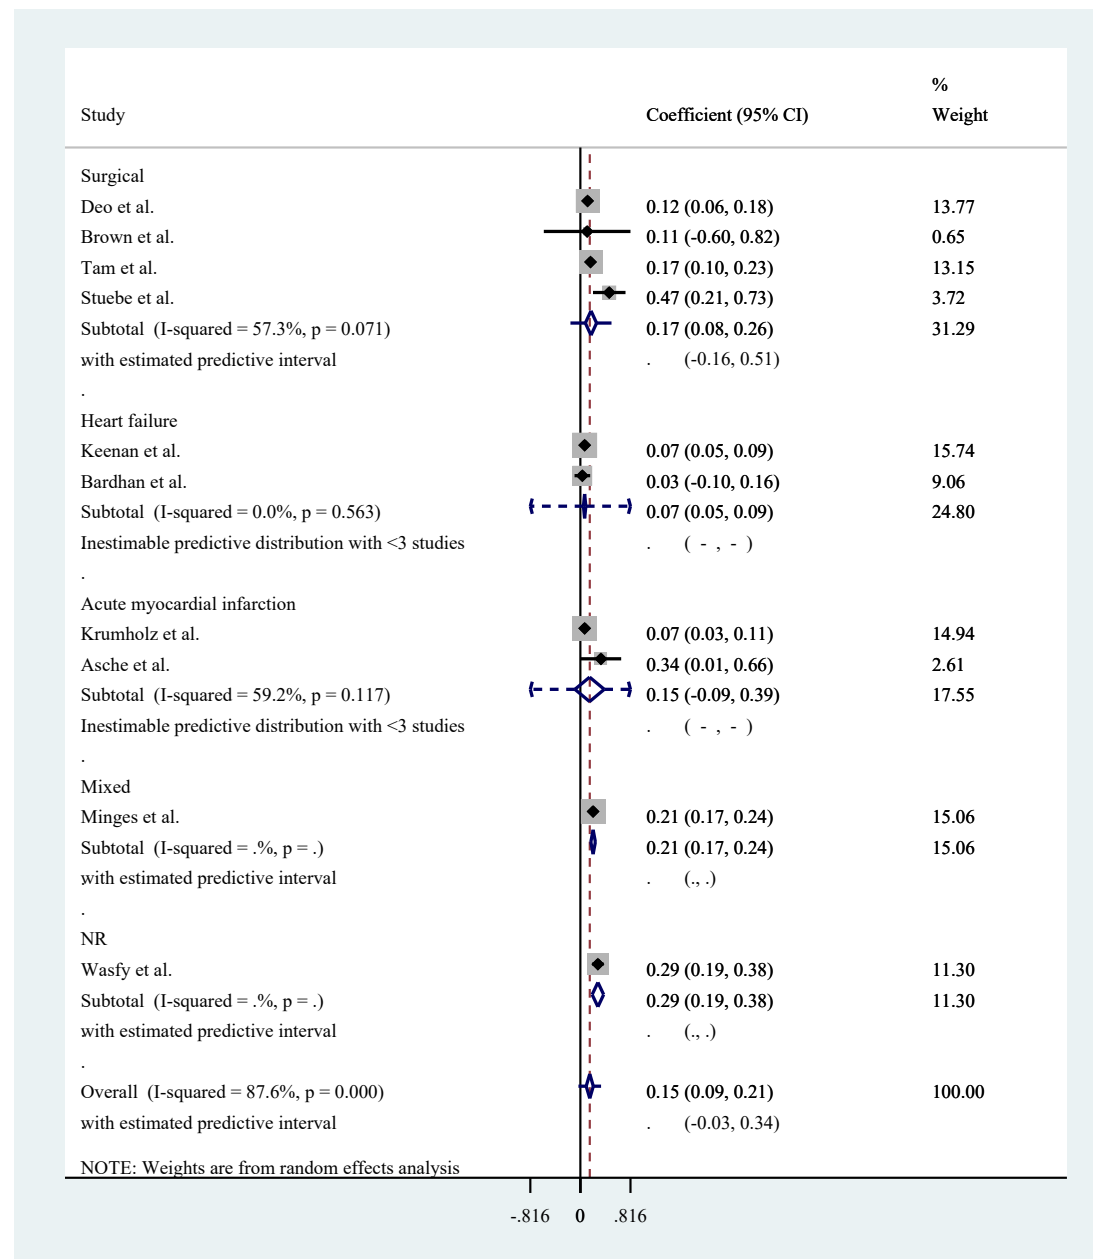

Legend: There was no missing data.

Supplemental Figure 25. Dementia as predictor

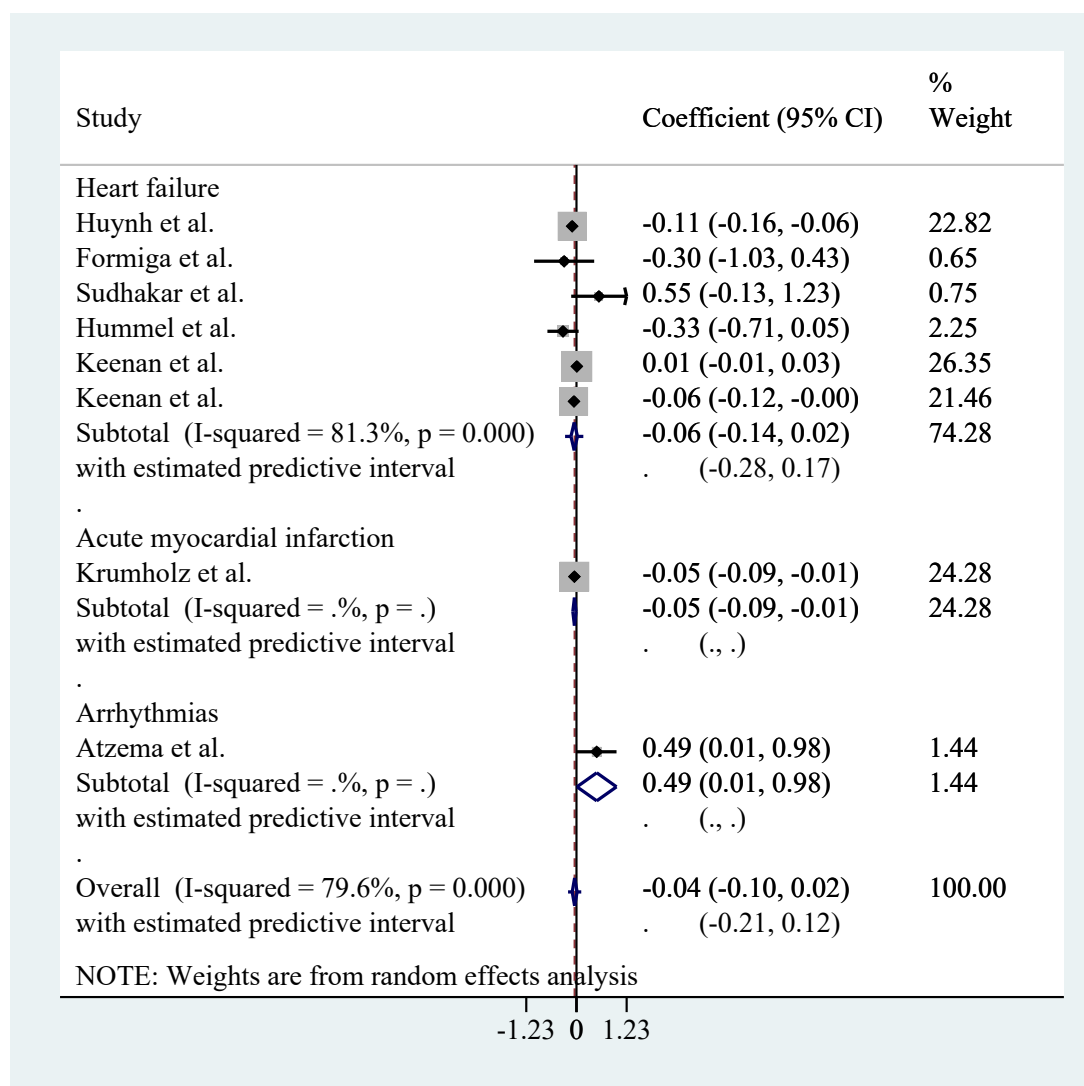

Legend: There was no missing data.

Supplemental Figure 26. Prior Coronary Artery Bypass Graft as predictor

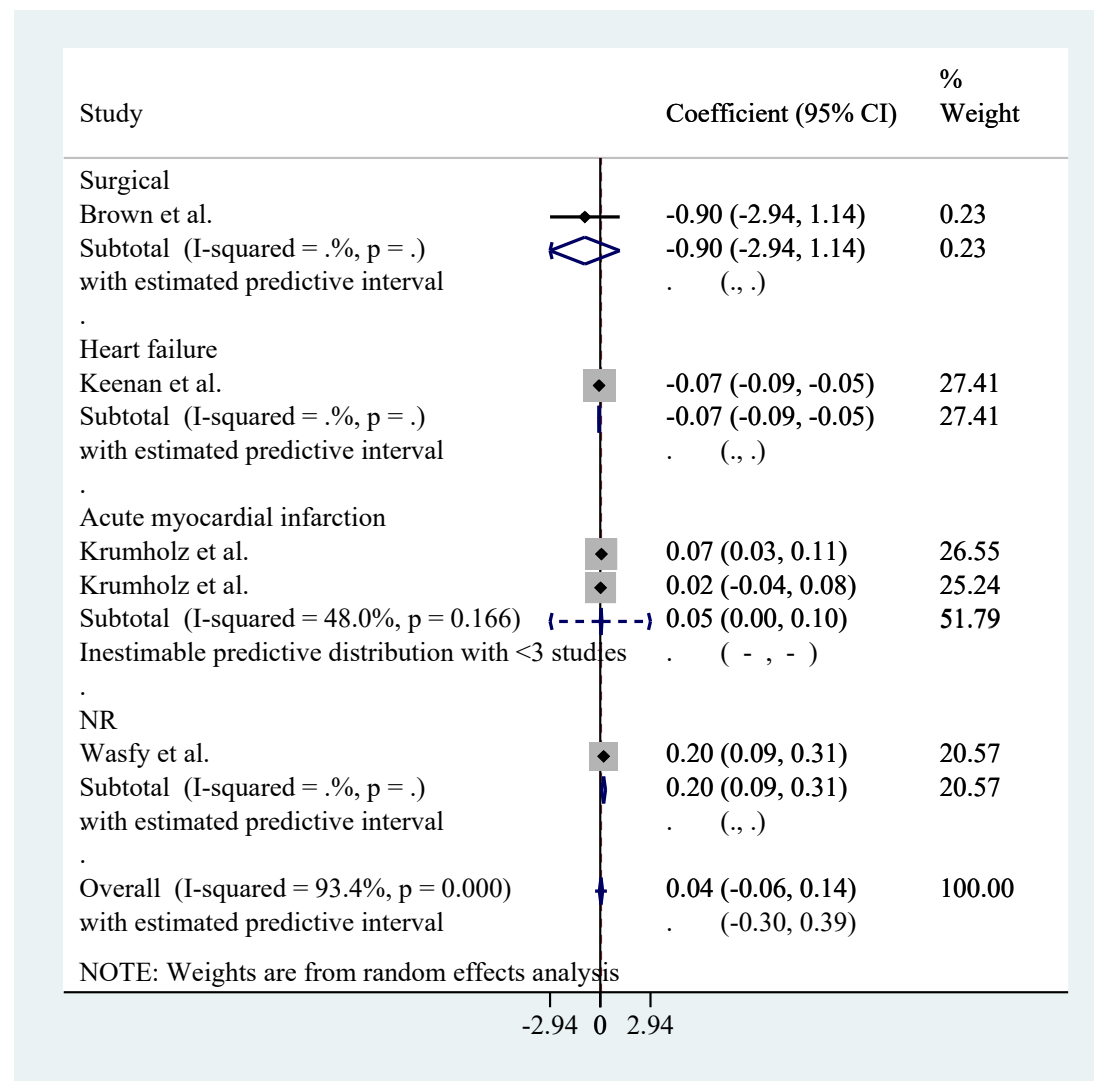

Legend: There was no missing data.
